# Supplementary material for: Directed copper-catalyzed C–H functionalization of unactivated olefins with azodicarbonamide compounds
Source: Royal Society of Chemistry journal article supplement (doi:10.1039/d4ra04113e), 2024-01-01

## Supporting Information

### **Directed Copper-Catalyzed C-H Functionalization of Unactivated Olefins with Azodicarbonamide Compounds**

Jing Cui,<sup>[a]</sup> Xiaoya Wang<sup>[a]</sup> and Runsheng Zeng\*

## Table of Contents

|                                                                                |    |
|--------------------------------------------------------------------------------|----|
| 1. General Information .....                                                   | 1  |
| 2. Instruments .....                                                           | 1  |
| 3. Optimization of Reaction Conditions <sup>a</sup> .....                      | 2  |
| 4. General Procedures for the Preparation of Alkene Substrates .....           | 4  |
| 4.1 General procedure for the substrate 1aa, 1ay <sup>[21]</sup> .....         | 5  |
| 4.2 General procedure for the substrate 1ab-1aw <sup>[21]</sup> .....          | 6  |
| 4.3 General procedure for the substrate 1ax, 1ay' <sup>[20-21]</sup> .....     | 18 |
| 4.4 General procedure for amide bond formation <sup>[21-24]</sup> .....        | 20 |
| 4.5 General procedure for the substrate 1bp, 1bq, 1br <sup>[20-21]</sup> ..... | 25 |
| 4.6 General procedure for the substrate 1bb-1bo <sup>[20-21]</sup> .....       | 27 |
| 5. General Procedures for the Heck-type Coupling Reactions .....               | 36 |
| 6. General Procedures for the Synthesis of $\beta$ -Lactams .....              | 52 |
| 7. Gram-scale Reactions .....                                                  | 64 |
| 8. Mechanistic Experiments .....                                               | 65 |
| 9. X-Ray Crystallography .....                                                 | 67 |
| 10. References .....                                                           | 72 |
| 11. NMR Spectra .....                                                          | 73 |

## 1. General Information

Unless otherwise noted, all reactions were performed in the oven-dried glass tubes with magnetic stirring. All reagents were purchased from commercial suppliers and used without further purification. TLC were performed on silica gel Huanghai HSGF254 plates and visualization of the developed chromatogram was performed by fluorescence quenching ( $\lambda_{\text{max}} = 254 \text{ nm}$ ). Column chromatography purifications were performed using 200 - 300 and 300 - 400 mesh silica gel.

## 2. Instruments

NMR spectra were recorded on Varian Inova-400 MHz, Inova-300 MHz, Bruker DRX-400 or Bruker DRX-500 instruments and chemical shifts were quoted in parts per million (ppm) referenced to the appropriate solvent peak. Multiplicities are recorded as: s = singlet, d = doublet, t = triplet, q = quartet, dd = doublet of doublets, dt = doublet of triplets, td = triplet of doublet, ddd = doublet of doublet of doublet, m = multiplet. Coupling constants,  $J$ , were reported in hertz unit (Hz). HRMS analysis were carried out using a Bruker micro TOF-Q instrument or a TOF-MS instrument. Melting point were recorded on X-4 micro melting point instrument. X-ray was carried out using the D8 VENTURE single crystal instrument.

### 3. Optimization of Reaction Conditions <sup>a</sup>

**Table S1. Optimization Conditions of the Heck-Type Reaction**

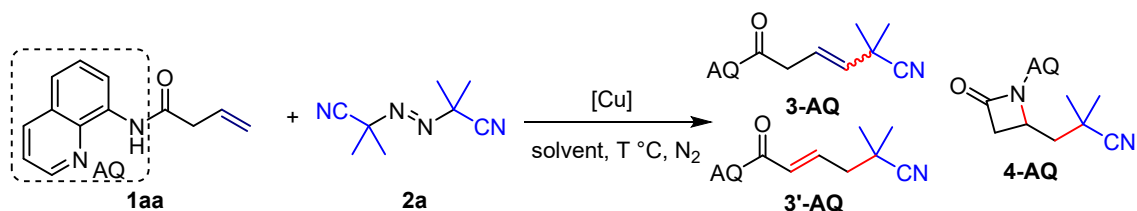

| entry                 | [Cu]                                      | solvent          | T/°C      | yield (%) <sup>b</sup><br>of <b>3-AQ</b> | yield (%) <sup>b</sup><br>of <b>4-AQ</b> | <i>rr</i><br>( <b>3-AQ</b> : <b>3'-AQ</b> ) | <i>E/Z</i>      |
|-----------------------|-------------------------------------------|------------------|-----------|------------------------------------------|------------------------------------------|---------------------------------------------|-----------------|
| 1                     | CuCl                                      | MeCN             | 90        | 35                                       | 32                                       | 10:1                                        | >20:1           |
| 2                     | CuI                                       | MeCN             | 90        | 30                                       | 38                                       | 10:1                                        | >20:1           |
| 3                     | Cu(MeCN) <sub>4</sub> PF <sub>6</sub>     | MeCN             | 90        | trace                                    | 67                                       | --                                          | --              |
| 4                     | CuOTf                                     | MeCN             | 90        | trace                                    | 61                                       | --                                          | --              |
| 5                     | Cu(OTf) <sub>2</sub>                      | MeCN             | 90        | trace                                    | 63                                       | --                                          | --              |
| 6                     | Cu(OAc) <sub>2</sub>                      | MeCN             | 90        | 62                                       | 12                                       | 12:1                                        | >20:1           |
| 7                     | CuBr <sub>2</sub>                         | MeCN             | 90        | 59                                       | 15                                       | 12:1                                        | >20:1           |
| 8                     | Cu(OAc) <sub>2</sub> ·H <sub>2</sub> O    | MeCN             | 90        | 65                                       | trace                                    | 13:1                                        | >20:1           |
| 9                     | Cu(OAc) <sub>2</sub> ·H <sub>2</sub> O    | DCE              | 90        | 28                                       | 41                                       | 12:1                                        | >20:1           |
| 10                    | Cu(OAc) <sub>2</sub> ·H <sub>2</sub> O    | toluene          | 90        | 32                                       | 21                                       | 5:1                                         | >20:1           |
| 11                    | Cu(OAc) <sub>2</sub> ·H <sub>2</sub> O    | DMSO             | 90        | 32                                       | trace                                    | 8:1                                         | >20:1           |
| 12                    | Cu(OAc) <sub>2</sub> ·H <sub>2</sub> O    | DMF              | 90        | 36                                       | trace                                    | 6:1                                         | >20:1           |
| 13                    | Cu(OAc) <sub>2</sub> ·H <sub>2</sub> O    | THF              | 90        | 44                                       | 36                                       | 12:1                                        | >20:1           |
| 14                    | Cu(OAc) <sub>2</sub> ·H <sub>2</sub> O    | MeOH             | 90        | 67                                       | trace                                    | >20:1                                       | >20:1           |
| 15                    | Cu(OAc) <sub>2</sub> ·H <sub>2</sub> O    | EtOH             | 90        | 69                                       | trace                                    | >20:1                                       | >20:1           |
| 16                    | Cu(OAc) <sub>2</sub> ·H <sub>2</sub> O    | <i>i</i> PrOH    | 90        | 68                                       | trace                                    | >20:1                                       | >20:1           |
| 17                    | Cu(OAc) <sub>2</sub> ·H <sub>2</sub> O    | 2-butanol        | 90        | 70                                       | trace                                    | >20:1                                       | >20:1           |
| <b>18<sup>c</sup></b> | <b>Cu(OAc)<sub>2</sub>·H<sub>2</sub>O</b> | <b>2-butanol</b> | <b>90</b> | <b>75</b>                                | <b>trace</b>                             | <b>&gt;20:1</b>                             | <b>&gt;20:1</b> |
| 19 <sup>c</sup>       | Cu(OAc) <sub>2</sub> ·H <sub>2</sub> O    | 2-butanol        | 80        | 70                                       | trace                                    | >20:1                                       | >20:1           |
| 20 <sup>c</sup>       | Cu(OAc) <sub>2</sub> ·H <sub>2</sub> O    | 2-butanol        | 100       | 66                                       | trace                                    | >20:1                                       | >20:1           |

<sup>a</sup> Reaction conditions: **1aa** (0.2 mmol), **2a** (0.6 mmol), [Cu] (20 mol%) in solvent (1 mL) for 12 h.

<sup>b</sup> Isolated yield. <sup>c</sup> [Cu] (40 mol%).

**Table S2. Optimization Conditions of the Synthesis of  $\beta$ -Lactams <sup>a</sup>**

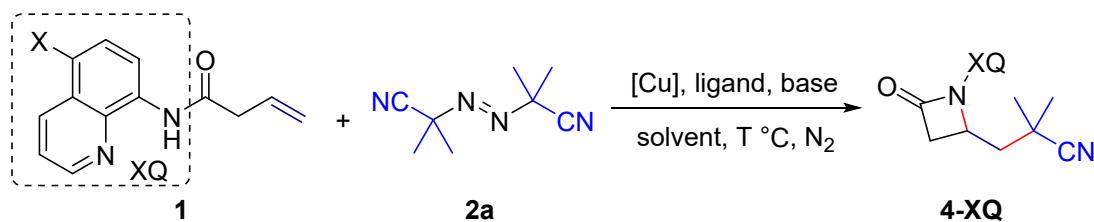

| entry                 | X        | [Cu]                                      | ligand | base                            | solvent                 | T/°C      | yield (%) <sup>b</sup> of <b>4-XQ</b> |
|-----------------------|----------|-------------------------------------------|--------|---------------------------------|-------------------------|-----------|---------------------------------------|
| 1                     | I        | Cu(MeCN) <sub>4</sub> PF <sub>6</sub>     | --     | --                              | 1,4-dioxane             | 110       | 39                                    |
| 2                     | I        | Cu(OTf) <sub>2</sub>                      | --     | --                              | 1,4-dioxane             | 110       | 28                                    |
| 3                     | I        | CuOTf                                     | --     | --                              | 1,4-dioxane             | 110       | 20                                    |
| 4                     | I        | CuI                                       | --     | --                              | 1,4-dioxane             | 110       | trace                                 |
| 5                     | I        | Cu(MeCN) <sub>4</sub> PF <sub>6</sub>     | --     | --                              | DCE                     | 110       | 15                                    |
| 6                     | I        | Cu(MeCN) <sub>4</sub> PF <sub>6</sub>     | --     | --                              | DCM                     | 110       | 24                                    |
| 7                     | I        | Cu(MeCN) <sub>4</sub> PF <sub>6</sub>     | --     | --                              | <i>t</i> -BuOH          | 110       | trace                                 |
| 8                     | I        | Cu(MeCN) <sub>4</sub> PF <sub>6</sub>     | --     | --                              | CH <sub>3</sub> CN      | 110       | 49                                    |
| 9 <sup>c</sup>        | I        | Cu(MeCN) <sub>4</sub> PF <sub>6</sub>     | --     | --                              | CH <sub>3</sub> CN      | 110       | 61                                    |
| 10 <sup>d</sup>       | I        | Cu(MeCN) <sub>4</sub> PF <sub>6</sub>     | --     | --                              | CH <sub>3</sub> CN      | 110       | 70                                    |
| 11 <sup>d</sup>       | I        | Cu(MeCN) <sub>4</sub> PF <sub>6</sub>     | --     | --                              | CH <sub>3</sub> CN      | 100       | 72                                    |
| <b>12<sup>d</sup></b> | <b>I</b> | <b>Cu(MeCN)<sub>4</sub>PF<sub>6</sub></b> | --     | --                              | <b>CH<sub>3</sub>CN</b> | <b>90</b> | <b>89</b>                             |
| 13 <sup>d</sup>       | I        | Cu(MeCN) <sub>4</sub> PF <sub>6</sub>     | --     | --                              | CH <sub>3</sub> CN      | 80        | 80                                    |
| 14 <sup>d</sup>       | H        | Cu(MeCN) <sub>4</sub> PF <sub>6</sub>     | --     | --                              | CH <sub>3</sub> CN      | 90        | 70                                    |
| 15 <sup>d</sup>       | Cl       | Cu(MeCN) <sub>4</sub> PF <sub>6</sub>     | --     | --                              | CH <sub>3</sub> CN      | 90        | 72                                    |
| 16 <sup>d</sup>       | Br       | Cu(MeCN) <sub>4</sub> PF <sub>6</sub>     | --     | --                              | CH <sub>3</sub> CN      | 90        | 75                                    |
| 17 <sup>d</sup>       | I        | Cu(MeCN) <sub>4</sub> PF <sub>6</sub>     | phen   | --                              | CH <sub>3</sub> CN      | 90        | 71                                    |
| 18 <sup>d</sup>       | I        | Cu(MeCN) <sub>4</sub> PF <sub>6</sub>     | bpy    | --                              | CH <sub>3</sub> CN      | 90        | 66                                    |
| 19 <sup>d</sup>       | I        | Cu(MeCN) <sub>4</sub> PF <sub>6</sub>     | BINAP  | --                              | CH <sub>3</sub> CN      | 90        | 73                                    |
| 20 <sup>d</sup>       | I        | Cu(MeCN) <sub>4</sub> PF <sub>6</sub>     | --     | Et <sub>3</sub> N               | CH <sub>3</sub> CN      | 90        | 54                                    |
| 21 <sup>d</sup>       | I        | Cu(MeCN) <sub>4</sub> PF <sub>6</sub>     | --     | K <sub>2</sub> CO <sub>3</sub>  | CH <sub>3</sub> CN      | 90        | 35                                    |
| 22 <sup>d</sup>       | I        | Cu(MeCN) <sub>4</sub> PF <sub>6</sub>     | --     | Na <sub>2</sub> CO <sub>3</sub> | CH <sub>3</sub> CN      | 90        | 32                                    |

<sup>a</sup> Reaction conditions: **1** (0.2 mmol), **2a** (0.4 mmol), [Cu] (20 mol%) in solvent (2 mL) for 12 h.

<sup>b</sup> Isolated yield. <sup>c</sup> **2a** (0.6 mmol). <sup>d</sup> **2a** (0.8 mmol). Ligand (0.4 mmol). Base (0.4 mmol).

## 4. General Procedures for the Preparation of Alkene

### Substrates

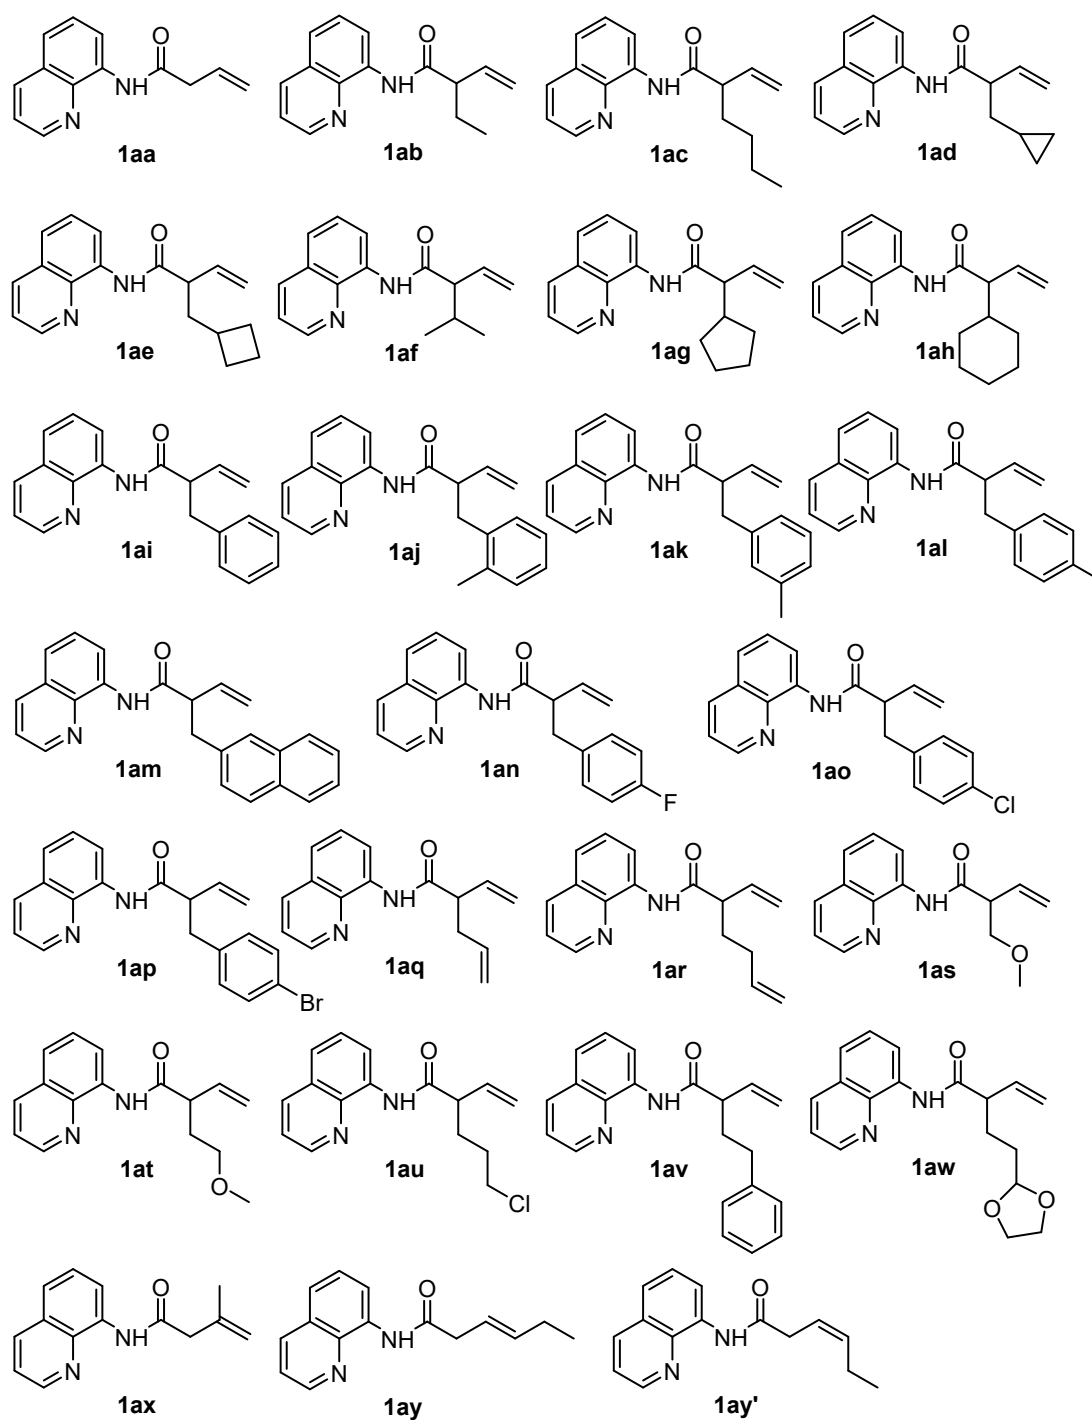

Scheme S1. Alkene Substrates (AQ-Directed, Yields are unoptimized)

#### 4.1 General procedure for the substrate **1aa**, **1ay**<sup>[21]</sup>

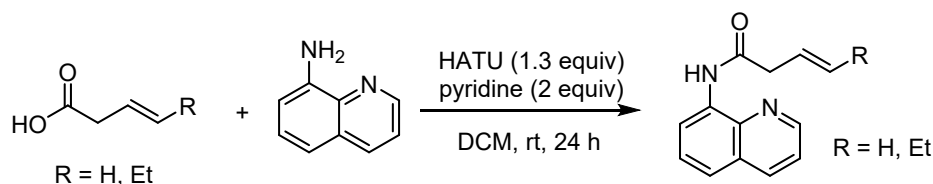

**Scheme S2. Synthesis of substrate **1aa**, **1ay****

Vinyl acetic acid or  $\gamma$ -substituted vinyl acetic acid (12 mmol, 1.2 equiv, from commercial sources) was charged into a 150 mL flask containing 30 mL DCM. 8-Aminoquinoline (1.44 g, 10 mmol, 1 equiv), pyridine (2.6 mL, 20 mmol, 2 equiv), and HATU (4.94 g, 13 mmol, 1.3 equiv) were added sequentially, and the reaction was stirred at room temperature for 24 h. The deep brown solution was diluted with DCM (100 mL), washed with sat. NaHCO<sub>3</sub> (100 mL,  $\times 2$ ) and brine (100 mL,  $\times 2$ ). The organic layer was evaporated under reduced pressure and the residue was purified by column chromatography on silica gel (200 - 300 mesh), eluting with 10%-20% EtOAc/petroleum ether to give the desire product.

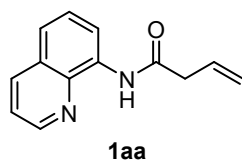

$R_f = 0.5$ , Petroleum Ether: Ethyl Acetate = 5: 1 (v/v)

Compound **1aa** was prepared following the general procedure in 89% yield (1.89 g) as a yellow oil.

<sup>1</sup>H NMR (400 MHz, Chloroform-*d*)  $\delta$  9.93 (s, 1H), 8.78 – 8.68 (m, 2H), 8.07 (dd,  $J = 8.2, 1.7$  Hz, 1H), 7.50 – 7.40 (m, 2H), 7.37 (dd,  $J = 8.3, 4.2$  Hz, 1H), 6.12 (ddt,  $J = 17.2, 10.2, 7.1$  Hz, 1H), 5.40 – 5.26 (m, 2H), 3.32 (dt,  $J = 7.1, 1.3$  Hz, 2H).

<sup>13</sup>C NMR (101 MHz, Chloroform-*d*)  $\delta$  169.23, 148.19, 138.39, 136.28, 134.33, 130.98, 127.87, 127.29, 121.59, 121.56, 120.02, 116.42, 43.14.

HRMS (ESI-TOF):  $m/z$  Calcd for C<sub>13</sub>H<sub>13</sub>N<sub>2</sub>O<sup>+</sup> [M+H<sup>+</sup>]: 213.1022; found: 213.1029.

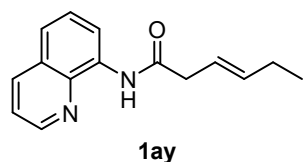

$R_f = 0.4$ , Petroleum Ether: Ethyl Acetate = 10: 1 (v/v)

Compound **1ay** was prepared following the general procedure in 80% yield (1.92 g) as a yellow oil.

$^1\text{H NMR}$  (400 MHz, Chloroform-*d*)  $\delta$  10.08 (s, 1H), 8.81 – 8.72 (m, 2H), 8.12 (dd,  $J = 8.3, 1.7$  Hz, 1H), 7.55 – 7.44 (m, 2H), 7.41 (dd,  $J = 8.3, 4.2$  Hz, 1H), 5.91 – 5.81 (m, 1H), 5.73 (dtt,  $J = 15.5, 7.1, 1.4$  Hz, 1H), 3.26 (dq,  $J = 7.1, 1.1$  Hz, 2H), 2.18 (qdd,  $J = 7.5, 6.3, 1.3$  Hz, 2H), 1.11 (t,  $J = 7.5$  Hz, 3H).

$^{13}\text{C NMR}$  (101 MHz, Chloroform-*d*)  $\delta$  170.19, 148.17, 138.76, 138.58, 136.39, 134.53, 128.00, 127.46, 121.61, 121.56, 121.46, 116.42, 42.16, 25.87, 13.65.

**HRMS** (ESI-TOF):  $m/z$  Calcd for  $\text{C}_{15}\text{H}_{17}\text{N}_2\text{O}^+$  [ $\text{M}+\text{H}^+$ ]: 241.1335; found: 241.1338.

#### 4.2 General procedure for the substrate **1ab-1aw**<sup>[21]</sup>

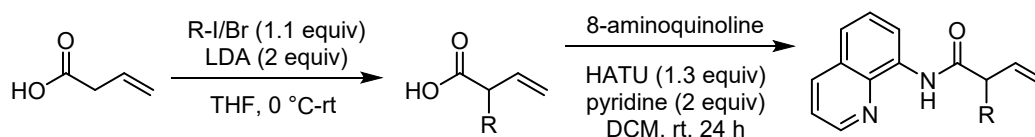

**Scheme S3. Synthesis of substrate **1ab-1aw****

Step1: A solution of commercial LDA 2 M (11.8 mL, 23.5 mmol, 2 equiv) in THF was cooled to ice-water temperature and a solution of 3-butenoic acid (1 mL, 11.77 mmol, 1 equiv) in 10 mL of THF was added slowly over a period of 15 min. The resulting mixture was stirred at the 0°C for 45 min to obtain a deep yellow solution. A total of R-I/Br (12.9 mmol, 1.1 equiv) of the alkylating agent was added, whereupon the reaction mixture immediately turned colorless. After 30 min at the same temperature and 3 h at room temperature, the pH of the solution was adjusted to 2.5 with 10% HCl. The organic phase was separated. The aqueous layer was saturated with solid NaCl and the mixture was extracted with DCM. The combined organic layers were dried over anhydrous  $\text{Na}_2\text{SO}_4$ , filtered and concentrated *in vacuo* to obtain the  $\alpha$ -substituted 3-butenoic acid.

Step 2:  $\alpha$ -Substituted vinyl acetic acid (12 mmol, 1.2 equiv) was charged into a 150



mL flask containing 30 mL DCM. 8-Aminoquinoline (1.44 g, 10 mmol, 1 equiv), pyridine (2.6 mL, 20 mmol, 2 equiv), and HATU (4.94 g, 13 mmol, 1.3 equiv) were added sequentially, and the reaction was stirred at room temperature for 24 h. The deep brown solution was diluted with DCM (100 mL), washed with sat. NaHCO<sub>3</sub> (100 mL, ×2) and brine (100 mL, ×2). The organic layer was evaporated under reduced pressure and the residue was purified by column chromatography on silica gel (200 - 300 mesh), eluting with 5%-20% EtOAc/petroleum ether to give the desired product.

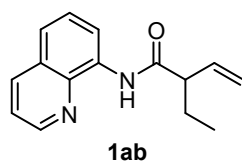

$R_f$  = 0.4, Petroleum Ether: Ethyl Acetate = 15: 1 (v/v)

Compound **1ab** was prepared following the general procedure in 35% yield (0.83 g) as a yellow oil.

**<sup>1</sup>H NMR** (400 MHz, Chloroform-*d*)  $\delta$  9.87 (s, 1H), 8.74 – 8.62 (m, 2H), 7.98 (dt,  $J$  = 8.3, 1.6 Hz, 1H), 7.43 – 7.31 (m, 2H), 7.29 (ddd,  $J$  = 8.3, 4.2, 1.5 Hz, 1H), 5.91 (ddd,  $J$  = 17.1, 10.2, 8.7 Hz, 1H), 5.31 – 5.12 (m, 2H), 3.05 – 2.92 (m, 1H), 1.93 (ddd,  $J$  = 14.0, 7.5, 6.6 Hz, 1H), 1.70 – 1.54 (m, 1H), 0.90 (t,  $J$  = 7.5 Hz, 3H).

**<sup>13</sup>C NMR** (101 MHz, Chloroform-*d*)  $\delta$  172.12, 148.21, 138.50, 136.82, 136.28, 134.49, 127.91, 127.33, 121.56, 121.50, 118.15, 116.39, 55.09, 25.12, 11.82.

**HRMS** (ESI-TOF):  $m/z$  Calcd for C<sub>15</sub>H<sub>16</sub>N<sub>2</sub>NaO<sup>+</sup> [M+Na<sup>+</sup>]: 263.1155; found: 263.1162.

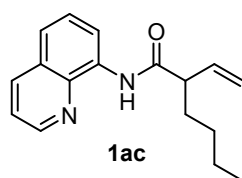

$R_f$  = 0.5, Petroleum Ether: Ethyl Acetate = 10: 1 (v/v)

Compound **1ac** was prepared following the general procedure in 27% yield (0.72 g) as a yellow oil.

**<sup>1</sup>H NMR** (400 MHz, Chloroform-*d*)  $\delta$  9.97 (s, 1H), 8.83 – 8.72 (m, 2H), 8.10 (dd,  $J$  = 8.3, 1.7 Hz, 1H), 7.54 – 7.42 (m, 2H), 7.40 (dd,  $J$  = 8.3, 4.2 Hz, 1H), 6.02 (ddd,  $J$  =

17.2, 10.1, 8.6 Hz, 1H), 5.41 – 5.21 (m, 2H), 3.17 (q,  $J = 7.7$  Hz, 1H), 2.05 – 1.94 (m, 1H), 1.75 – 1.61 (m, 1H), 1.47 – 1.26 (m, 4H), 0.99 – 0.80 (m, 3H).

$^{13}\text{C}$  NMR (101 MHz, Chloroform-*d*)  $\delta$  172.26, 148.25, 138.56, 137.17, 136.32, 134.56, 127.95, 127.39, 121.59, 121.51, 117.95, 116.43, 53.55, 31.71, 29.47, 22.64, 14.03.

**HRMS** (ESI-TOF):  $m/z$  Calcd for  $\text{C}_{17}\text{H}_{20}\text{N}_2\text{NaO}^+$   $[\text{M}+\text{Na}^+]$ : 291.1468; found: 291.1470.

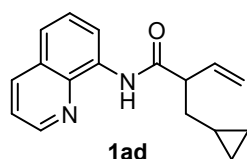

$R_f = 0.5$ , Petroleum Ether: Ethyl Acetate = 15: 1 (v/v)

Compound **1ad** was prepared following the general procedure in 36% yield (0.95 g) as a yellow oil.

$^1\text{H}$  NMR (400 MHz, Chloroform-*d*)  $\delta$  9.98 (s, 1H), 8.76 (ddt,  $J = 17.8, 6.0, 2.0$  Hz, 2H), 8.02 (td,  $J = 8.5, 1.8$  Hz, 1H), 7.49 – 7.36 (m, 2H), 7.33 (td,  $J = 8.1, 4.3$  Hz, 1H), 6.06 (dddd,  $J = 17.1, 10.2, 9.2, 2.6$  Hz, 1H), 5.40 – 5.18 (m, 2H), 3.29 (qd,  $J = 7.3, 2.6$  Hz, 1H), 1.81 (dtd,  $J = 14.3, 7.3, 2.5$  Hz, 1H), 1.65 (dtd,  $J = 13.8, 6.9, 3.0$  Hz, 1H), 0.77 (qdt,  $J = 11.3, 7.8, 4.0$  Hz, 1H), 0.49 – 0.32 (m, 2H), 0.10 (dq,  $J = 5.1, 3.7$  Hz, 2H).

$^{13}\text{C}$  NMR (101 MHz, Chloroform-*d*)  $\delta$  171.98, 148.10, 137.00, 136.14, 134.41, 127.78, 127.20, 121.44, 121.39, 117.65, 116.26, 53.81, 37.22, 8.97, 4.68, 4.57.

**HRMS** (ESI-TOF):  $m/z$  Calcd for  $\text{C}_{17}\text{H}_{18}\text{N}_2\text{NaO}^+$   $[\text{M}+\text{Na}^+]$ : 289.1311; found: 289.1316.

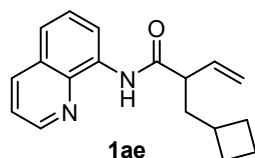

$R_f = 0.3$ , Petroleum Ether: Ethyl Acetate = 10: 1 (v/v)

Compound **1ae** was prepared following the general procedure in 38% yield (1.05 g) as a yellow oil.

**<sup>1</sup>H NMR** (400 MHz, Chloroform-*d*)  $\delta$  9.94 (s, 1H), 8.85 – 8.73 (m, 2H), 8.11 (dd,  $J$  = 8.3, 1.7 Hz, 1H), 7.53 – 7.43 (m, 2H), 7.41 (dd,  $J$  = 8.3, 4.2 Hz, 1H), 6.01 (ddd,  $J$  = 17.1, 10.1, 8.6 Hz, 1H), 5.37 – 5.21 (m, 2H), 3.12 (q,  $J$  = 7.7 Hz, 1H), 2.41 (hept,  $J$  = 7.9 Hz, 1H), 2.15 – 1.99 (m, 3H), 1.86 – 1.74 (m, 3H), 1.69 (tt,  $J$  = 10.9, 8.4 Hz, 2H).

**<sup>13</sup>C NMR** (101 MHz, Chloroform-*d*)  $\delta$  172.21, 148.26, 138.56, 137.17, 136.37, 134.57, 127.99, 127.43, 121.61, 121.53, 117.72, 116.48, 51.77, 39.29, 34.00, 28.59, 28.32, 18.55.

**HRMS** (ESI-TOF):  $m/z$  Calcd for C<sub>18</sub>H<sub>20</sub>N<sub>2</sub>NaO<sup>+</sup> [M+Na<sup>+</sup>]: 303.1468; found: 303.1474.

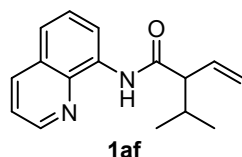

$R_f$  = 0.5, Petroleum Ether: Ethyl Acetate = 10: 1 (v/v)

Compound **1af** was prepared following the general procedure in 32% yield (0.82 g) as a yellow oil.

**<sup>1</sup>H NMR** (400 MHz, Chloroform-*d*)  $\delta$  9.91 (s, 1H), 8.87 – 8.69 (m, 2H), 8.06 (dt,  $J$  = 8.3, 1.5 Hz, 1H), 7.51 – 7.40 (m, 2H), 7.37 (ddd,  $J$  = 8.3, 4.2, 1.2 Hz, 1H), 6.03 (ddd,  $J$  = 17.0, 10.2, 9.4 Hz, 1H), 5.34 – 5.21 (m, 2H), 2.93 – 2.78 (m, 1H), 2.33 – 2.20 (m, 1H), 1.03 (d,  $J$  = 6.7 Hz, 3H), 0.98 (d,  $J$  = 6.7 Hz, 3H).

**<sup>13</sup>C NMR** (101 MHz, Chloroform-*d*)  $\delta$  172.06, 148.17, 138.44, 136.25, 135.75, 134.45, 127.88, 127.31, 121.54, 121.47, 118.73, 116.39, 61.37, 30.30, 21.02, 19.71.

**HRMS** (ESI-TOF):  $m/z$  Calcd for C<sub>16</sub>H<sub>18</sub>N<sub>2</sub>NaO<sup>+</sup> [M+Na<sup>+</sup>]: 277.1311; found: 277.1317.

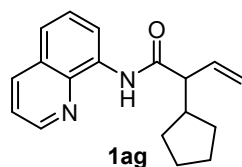

$R_f$  = 0.5, Petroleum Ether: Ethyl Acetate = 10: 1 (v/v)

Compound **1ag** was prepared following the general procedure in 17% yield (0.48 g) as a yellow oil.

**<sup>1</sup>H NMR** (400 MHz, Chloroform-*d*)  $\delta$  9.90 (s, 1H), 8.84 – 8.74 (m, 2H), 8.14 (dd,  $J$  = 8.2, 1.7 Hz, 1H), 7.55 – 7.46 (m, 2H), 7.44 (dd,  $J$  = 8.3, 4.2 Hz, 1H), 6.05 (ddd,  $J$  = 17.1, 10.2, 9.0 Hz, 1H), 5.37 – 5.16 (m, 2H), 2.97 (t,  $J$  = 9.2 Hz, 1H), 2.42 (qt,  $J$  = 9.0, 7.4 Hz, 1H), 1.93 – 1.77 (m, 2H), 1.71 – 1.49 (m, 4H), 1.38 – 1.25 (m, 2H).

**<sup>13</sup>C NMR** (101 MHz, Chloroform-*d*)  $\delta$  172.36, 148.29, 138.58, 136.76, 136.47, 134.63, 128.05, 127.53, 121.67, 121.54, 117.77, 116.58, 59.74, 42.11, 31.11, 30.50, 25.32, 25.12.

**HRMS** (ESI-TOF):  $m/z$  Calcd for C<sub>18</sub>H<sub>21</sub>N<sub>2</sub>O<sup>+</sup> [M+H<sup>+</sup>]: 281.1648; found: 281.1652.

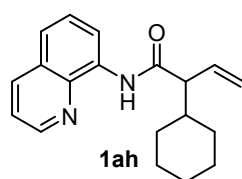

$R_f$  = 0.5, Petroleum Ether: Ethyl Acetate = 10: 1 (v/v)

Compound **1ah** was prepared following the general procedure in 12% yield (0.35 g) as a yellow oil.

**<sup>1</sup>H NMR** (400 MHz, Chloroform-*d*)  $\delta$  9.89 (s, 1H), 8.86 – 8.75 (m, 2H), 8.13 (dd,  $J$  = 8.3, 1.7 Hz, 1H), 7.55 – 7.45 (m, 2H), 7.43 (dd,  $J$  = 8.2, 4.2 Hz, 1H), 6.03 (ddd,  $J$  = 17.0, 10.2, 9.4 Hz, 1H), 5.32 – 5.21 (m, 2H), 2.89 (t,  $J$  = 8.9 Hz, 1H), 2.00 – 1.89 (m, 1H), 1.89 – 1.79 (m, 2H), 1.77 – 1.60 (m, 3H), 1.35 – 1.22 (m, 2H), 1.20 – 1.05 (m, 2H), 0.97 (tdd,  $J$  = 12.6, 11.4, 3.5 Hz, 1H).

**<sup>13</sup>C NMR** (101 MHz, Chloroform-*d*)  $\delta$  172.19, 148.28, 138.56, 136.41, 136.03, 134.54, 128.02, 127.48, 121.65, 121.56, 118.50, 116.52, 60.82, 39.81, 31.56, 30.33, 26.45, 26.29.

**HRMS** (ESI-TOF):  $m/z$  Calcd for C<sub>19</sub>H<sub>23</sub>N<sub>2</sub>O<sup>+</sup> [M+H<sup>+</sup>]: 295.1805; found: 295.1812.

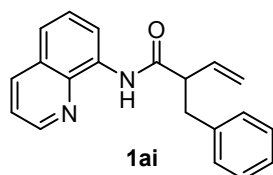

$R_f$  = 0.5, Petroleum Ether: Ethyl Acetate = 5: 1 (v/v)

Compound **1ai** was prepared following the general procedure in 21% yield (0.62 g) as a yellow oil.

**<sup>1</sup>H NMR** (400 MHz, Chloroform-*d*)  $\delta$  9.93 (s, 1H), 8.88 – 8.68 (m, 2H), 8.06 (dd,  $J = 8.3, 1.7$  Hz, 1H), 7.52 – 7.42 (m, 2H), 7.36 (dd,  $J = 8.3, 4.3$  Hz, 1H), 7.29 – 7.22 (m, 4H), 7.15 (ddt,  $J = 8.6, 5.5, 2.7$  Hz, 1H), 6.06 (ddd,  $J = 17.2, 10.2, 8.5$  Hz, 1H), 5.33 – 5.22 (m, 2H), 3.57 – 3.46 (m, 1H), 3.39 (dd,  $J = 13.7, 6.9$  Hz, 1H), 2.99 (dd,  $J = 13.7, 7.6$  Hz, 1H).

**<sup>13</sup>C NMR** (101 MHz, Chloroform-*d*)  $\delta$  171.26, 148.19, 139.19, 138.48, 136.35, 136.28, 134.42, 129.26, 127.91, 127.35, 126.33, 121.62, 121.57, 118.71, 116.47, 55.14, 38.16.

**HRMS** (ESI-TOF):  $m/z$  Calcd for C<sub>20</sub>H<sub>18</sub>N<sub>2</sub>NaO<sup>+</sup> [M+Na<sup>+</sup>]: 325.1311; found: 325.1307.

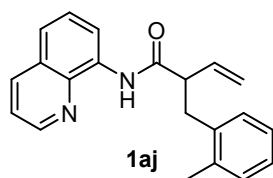

$R_f = 0.4$ , Petroleum Ether: Ethyl Acetate = 20: 1 (v/v)

Compound **1aj** was prepared following the general procedure in 30% yield (0.95 g) as a yellow oil.

**<sup>1</sup>H NMR** (400 MHz, Chloroform-*d*)  $\delta$  9.94 (s, 1H), 8.83 – 8.74 (m, 2H), 8.13 (dd,  $J = 8.3, 1.7$  Hz, 1H), 7.57 – 7.46 (m, 2H), 7.42 (dd,  $J = 8.3, 4.2$  Hz, 1H), 7.25 – 7.19 (m, 1H), 7.18 – 7.13 (m, 1H), 7.12 – 7.06 (m, 2H), 6.11 (ddd,  $J = 17.3, 9.9, 8.4$  Hz, 1H), 5.34 – 5.19 (m, 2H), 3.59 – 3.34 (m, 2H), 2.99 (dd,  $J = 13.7, 7.4$  Hz, 1H), 2.40 (s, 3H).

**<sup>13</sup>C NMR** (101 MHz, Chloroform-*d*)  $\delta$  171.49, 148.27, 138.57, 137.49, 136.49, 136.38, 134.51, 130.39, 129.94, 128.00, 127.45, 126.50, 125.93, 121.67, 121.65, 118.66, 116.55, 54.06, 35.32, 19.78.

**HRMS** (ESI-TOF):  $m/z$  Calcd for C<sub>21</sub>H<sub>20</sub>N<sub>2</sub>NaO<sup>+</sup> [M+Na<sup>+</sup>]: 339.1468; found: 339.1475.

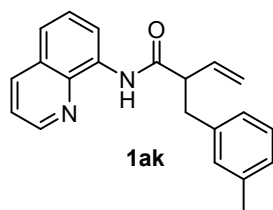

$R_f = 0.6$ , Petroleum Ether: Ethyl Acetate = 10: 1 (v/v)

Compound **1ak** was prepared following the general procedure in 17% yield (0.53 g) as a yellow oil.

**$^1\text{H NMR}$**  (400 MHz, Chloroform-*d*)  $\delta$  9.95 (s, 1H), 8.83 (dd,  $J = 7.6, 1.4$  Hz, 1H), 8.75 (dd,  $J = 4.3, 1.7$  Hz, 1H), 8.09 (dd,  $J = 8.2, 1.8$  Hz, 1H), 7.56 – 7.43 (m, 2H), 7.39 (dd,  $J = 8.2, 4.2$  Hz, 1H), 7.17 (t,  $J = 7.4$  Hz, 1H), 7.13 – 7.06 (m, 2H), 6.99 (d,  $J = 7.4$  Hz, 1H), 6.10 (ddd,  $J = 17.2, 10.2, 8.5$  Hz, 1H), 5.40 – 5.24 (m, 2H), 3.54 (q,  $J = 7.6$  Hz, 1H), 3.39 (dd,  $J = 13.7, 6.9$  Hz, 1H), 2.99 (dd,  $J = 13.7, 7.6$  Hz, 1H), 2.30 (s, 3H).

**$^{13}\text{C NMR}$**  (101 MHz, Chloroform-*d*)  $\delta$  171.35, 148.14, 139.05, 138.44, 137.84, 136.42, 136.24, 134.39, 130.01, 128.25, 127.87, 127.31, 127.07, 126.23, 121.56, 121.52, 118.56, 116.44, 55.10, 38.13, 21.39.

**HRMS** (ESI-TOF):  $m/z$  Calcd for  $\text{C}_{21}\text{H}_{20}\text{N}_2\text{NaO}^+$   $[\text{M}+\text{Na}^+]$ : 339.1468; found: 339.1472.

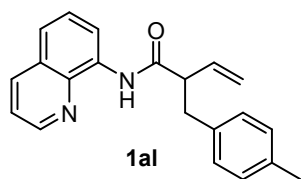

$R_f = 0.6$ , Petroleum Ether: Ethyl Acetate = 10: 1 (v/v)

Compound **1al** was prepared following the general procedure in 31% yield (0.97 g) as a yellow oil.

**$^1\text{H NMR}$**  (400 MHz, Chloroform-*d*)  $\delta$  9.96 (s, 1H), 8.83 (dd,  $J = 7.5, 1.5$  Hz, 1H), 8.75 (dd,  $J = 4.2, 1.7$  Hz, 1H), 8.09 (dd,  $J = 8.2, 1.7$  Hz, 1H), 7.56 – 7.44 (m, 2H), 7.39 (dd,  $J = 8.3, 4.2$  Hz, 1H), 7.23 – 7.14 (m, 2H), 7.08 (d,  $J = 7.8$  Hz, 2H), 6.09 (ddd,  $J = 17.2, 10.2, 8.5$  Hz, 1H), 5.41 – 5.22 (m, 2H), 3.58 – 3.47 (m, 1H), 3.38 (dd,  $J = 13.8, 6.9$  Hz, 1H), 2.99 (dd,  $J = 13.8, 7.6$  Hz, 1H), 2.29 (s, 3H).

**$^{13}\text{C NMR}$**  (101 MHz, Chloroform-*d*)  $\delta$  171.35, 148.15, 138.46, 136.44, 136.24, 136.03, 135.72, 134.43, 129.10, 129.07, 127.88, 127.32, 121.57, 121.54, 118.60, 116.44, 55.21, 37.75, 21.05.

**HRMS** (ESI-TOF):  $m/z$  Calcd for  $C_{21}H_{20}N_2NaO^+$   $[M+Na^+]$ : 339.1468; found: 339.1473.

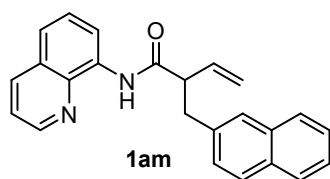

$R_f$  = 0.3, Petroleum Ether: Ethyl Acetate = 10: 1 (v/v)

Compound **1am** was prepared following the general procedure in 40% yield (1.41 g) as a yellow solid. m.p. 73-75 °C.

**$^1H$  NMR** (400 MHz, Chloroform-*d*)  $\delta$  9.95 (s, 1H), 8.81 (dd,  $J$  = 7.5, 1.5 Hz, 1H), 8.68 (dd,  $J$  = 4.3, 1.7 Hz, 1H), 8.10 (dd,  $J$  = 8.3, 1.7 Hz, 1H), 7.81 – 7.70 (m, 4H), 7.56 – 7.45 (m, 2H), 7.45 – 7.35 (m, 4H), 6.12 (ddd,  $J$  = 17.1, 10.2, 8.4 Hz, 1H), 5.36 – 5.23 (m, 2H), 3.68 – 3.49 (m, 2H), 3.17 (dd,  $J$  = 13.4, 7.3 Hz, 1H).

**$^{13}C$  NMR** (101 MHz, Chloroform-*d*)  $\delta$  171.34, 148.21, 138.53, 136.81, 136.37, 136.34, 134.46, 133.65, 132.32, 128.05, 127.98, 127.79, 127.67, 127.42, 125.96, 125.40, 121.70, 121.61, 118.90, 116.61, 55.17, 38.43.

**HRMS** (ESI-TOF):  $m/z$  Calcd for  $C_{24}H_{21}N_2O^+$   $[M+H^+]$ : 353.1648; found: 353.1643.

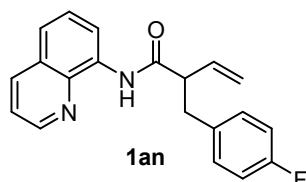

$R_f$  = 0.4, Petroleum Ether: Ethyl Acetate = 20: 1 (v/v)

Compound **1an** was prepared following the general procedure in 31% yield (1.00 g) as a white solid. m.p. 128-130 °C.

**$^1H$  NMR** (400 MHz, Chloroform-*d*)  $\delta$  9.92 (s, 1H), 8.79 (dd,  $J$  = 7.5, 1.5 Hz, 1H), 8.74 (dd,  $J$  = 4.3, 1.7 Hz, 1H), 8.09 (dt,  $J$  = 8.3, 1.3 Hz, 1H), 7.54 – 7.43 (m, 2H), 7.41 – 7.35 (m, 1H), 7.25 – 7.17 (m, 2H), 6.99 – 6.87 (m, 2H), 6.13 – 5.98 (m, 1H), 5.35 – 5.23 (m, 2H), 3.46 (q,  $J$  = 7.5 Hz, 1H), 3.34 (dd,  $J$  = 13.8, 7.0 Hz, 1H), 2.96 (dd,  $J$  = 13.8, 7.4 Hz, 1H).

**<sup>13</sup>C NMR** (101 MHz, Chloroform-*d*)  $\delta$  171.04, 162.78, 160.35, 148.22, 138.46, 136.30, 136.17, 134.85, 134.82, 134.34, 130.73, 130.65, 127.92, 127.32, 121.70, 121.61, 118.85, 116.48, 115.25, 115.04, 55.25, 37.35.

**<sup>19</sup>F NMR** (376 MHz, Chloroform-*d*)  $\delta$  -116.92.

**HRMS** (ESI-TOF):  $m/z$  Calcd for C<sub>20</sub>H<sub>17</sub>FN<sub>2</sub>NaO<sup>+</sup> [M+Na<sup>+</sup>]: 343.1217; found: 343.1223.

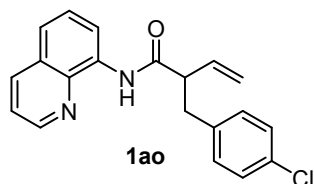

$R_f$  = 0.4, Petroleum Ether: Ethyl Acetate = 15: 1 (v/v)

Compound **1ao** was prepared following the general procedure in 15% yield (0.52 g) as a white solid. m.p. 126-128 °C.

**<sup>1</sup>H NMR** (400 MHz, Chloroform-*d*)  $\delta$  9.92 (s, 1H), 8.83 – 8.70 (m, 2H), 8.11 (dd,  $J$  = 8.3, 1.7 Hz, 1H), 7.56 – 7.45 (m, 2H), 7.41 (dd,  $J$  = 8.3, 4.2 Hz, 1H), 7.24 – 7.13 (m, 4H), 6.14 – 5.90 (m, 1H), 5.35 – 5.21 (m, 2H), 3.46 (q,  $J$  = 7.6 Hz, 1H), 3.34 (dd,  $J$  = 13.8, 7.0 Hz, 1H), 2.95 (dd,  $J$  = 13.7, 7.4 Hz, 1H).

**<sup>13</sup>C NMR** (101 MHz, Chloroform-*d*)  $\delta$  170.94, 148.28, 138.49, 137.69, 136.36, 136.06, 134.33, 132.14, 130.67, 128.53, 127.96, 127.37, 121.77, 121.66, 119.05, 116.54, 55.05, 37.48.

**HRMS** (ESI-TOF):  $m/z$  Calcd for C<sub>20</sub>H<sub>17</sub>ClN<sub>2</sub>NaO<sup>+</sup> [M+Na<sup>+</sup>]: 359.0922; found: 359.0928.

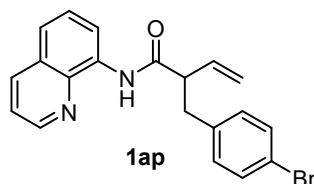

$R_f$  = 0.4, Petroleum Ether: Ethyl Acetate = 15: 1 (v/v)

Compound **1ap** was prepared following the general procedure in 10% yield (0.36 g) as a yellow solid. m.p. 125-127 °C.

**<sup>1</sup>H NMR** (400 MHz, Chloroform-*d*)  $\delta$  9.91 (s, 1H), 8.87 – 8.67 (m, 2H), 8.13 (dd,  $J$  = 8.3, 1.7 Hz, 1H), 7.57 – 7.46 (m, 2H), 7.42 (dd,  $J$  = 8.3, 4.2 Hz, 1H), 7.39 – 7.30 (m,



2H), 7.18 – 7.06 (m, 2H), 6.11 – 5.93 (m, 1H), 5.37 – 5.20 (m, 2H), 3.46 (q,  $J = 7.6$  Hz, 1H), 3.32 (dd,  $J = 13.8, 7.0$  Hz, 1H), 2.93 (dd,  $J = 13.8, 7.4$  Hz, 1H).

$^{13}\text{C}$  NMR (101 MHz, Chloroform- $d$ )  $\delta$  170.96, 148.33, 138.54, 138.26, 136.43, 136.08, 134.37, 131.52, 131.11, 128.02, 127.44, 121.81, 121.70, 120.30, 119.11, 116.61, 55.02, 37.59.

HRMS (ESI-TOF):  $m/z$  Calcd for  $\text{C}_{20}\text{H}_{18}\text{BrN}_2\text{O}^+$   $[\text{M}+\text{H}^+]$ : 381.0597; found: 381.0592.

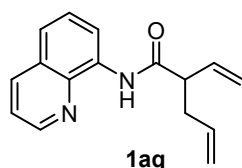

$R_f = 0.5$ , Petroleum Ether: Ethyl Acetate = 10: 1 (v/v)

Compound **1aq** was prepared following the general procedure in 22% yield (0.55 g) as a yellow oil.

$^1\text{H}$  NMR (400 MHz, Chloroform- $d$ )  $\delta$  10.00 (s, 1H), 8.78 (dq,  $J = 7.6, 3.3, 2.5$  Hz, 2H), 8.11 (dd,  $J = 8.3, 1.7$  Hz, 1H), 7.54 – 7.44 (m, 2H), 7.41 (dd,  $J = 8.3, 4.3$  Hz, 1H), 6.03 (ddd,  $J = 17.2, 10.2, 8.6$  Hz, 1H), 5.86 (ddt,  $J = 17.1, 10.2, 7.0$  Hz, 1H), 5.42 – 5.27 (m, 2H), 5.20 – 5.01 (m, 2H), 3.29 (ddd,  $J = 8.5, 7.6, 6.7$  Hz, 1H), 2.76 (dtt,  $J = 13.8, 6.8, 1.3$  Hz, 1H), 2.55 – 2.42 (m, 1H).

$^{13}\text{C}$  NMR (101 MHz, Chloroform- $d$ )  $\delta$  171.32, 148.25, 138.51, 136.38, 136.33, 135.38, 134.41, 127.93, 127.36, 121.62, 121.60, 118.51, 117.12, 116.47, 53.02, 36.16.

HRMS (ESI-TOF):  $m/z$  Calcd for  $\text{C}_{16}\text{H}_{17}\text{N}_2\text{O}^+$   $[\text{M}+\text{H}^+]$ : 253.1335; found: 253.1334.

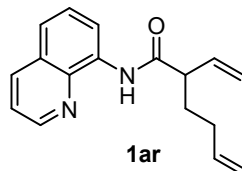

$R_f = 0.6$ , Petroleum Ether: Ethyl Acetate = 10: 1 (v/v)

Compound **1ar** was prepared following the general procedure in 19% yield (0.50 g) as a yellow oil.

$^1\text{H}$  NMR (400 MHz, Chloroform- $d$ )  $\delta$  9.98 (s, 1H), 8.82 – 8.72 (m, 2H), 8.09 (dd,  $J = 8.3, 1.7$  Hz, 1H), 7.52 – 7.42 (m, 2H), 7.39 (dd,  $J = 8.3, 4.2$  Hz, 1H), 6.01 (ddd,  $J =$

17.1, 10.1, 8.7 Hz, 1H), 5.83 (ddt,  $J = 16.8, 10.2, 6.5$  Hz, 1H), 5.41 – 5.24 (m, 2H), 5.10 – 4.96 (m, 2H), 3.21 (td,  $J = 8.1, 5.9$  Hz, 1H), 2.22 – 2.06 (m, 3H), 1.83 – 1.70 (m, 1H).

$^{13}\text{C}$  NMR (101 MHz, Chloroform-*d*)  $\delta$  171.88, 148.23, 138.50, 137.82, 136.80, 136.28, 134.47, 127.91, 127.33, 121.58, 121.55, 118.34, 116.41, 115.42, 52.59, 31.24, 30.89.

HRMS (ESI-TOF):  $m/z$  Calcd for  $\text{C}_{17}\text{H}_{19}\text{N}_2\text{O}^+$  [ $\text{M}+\text{H}^+$ ]: 267.1492; found: 267.1493.

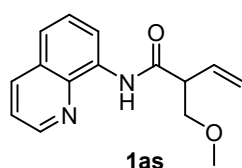

$R_f = 0.4$ , Petroleum Ether: Ethyl Acetate = 5: 1 (v/v)

Compound **1as** was prepared following the general procedure in 8% yield (0.21 g) as a yellow oil.

$^1\text{H}$  NMR (400 MHz, Chloroform-*d*)  $\delta$  10.35 (s, 1H), 8.84 – 8.73 (m, 2H), 8.13 (dd,  $J = 8.3, 1.7$  Hz, 1H), 7.55 – 7.45 (m, 2H), 7.42 (dd,  $J = 8.3, 4.2$  Hz, 1H), 6.09 (ddd,  $J = 17.2, 10.3, 8.3$  Hz, 1H), 5.48 – 5.28 (m, 2H), 3.86 (dd,  $J = 9.2, 7.2$  Hz, 1H), 3.72 (dd,  $J = 9.2, 5.2$  Hz, 1H), 3.51 (dddd,  $J = 8.2, 7.2, 3.6, 2.6$  Hz, 1H), 3.45 (s, 3H).

$^{13}\text{C}$  NMR (101 MHz, Chloroform-*d*)  $\delta$  170.46, 148.30, 138.67, 136.40, 134.67, 133.75, 128.03, 127.45, 121.72, 121.63, 119.49, 116.79, 73.24, 59.29, 53.29.

HRMS (ESI-TOF):  $m/z$  Calcd for  $\text{C}_{15}\text{H}_{16}\text{N}_2\text{NaO}_2^+$  [ $\text{M}+\text{Na}^+$ ]: 279.1104; found: 279.1107.

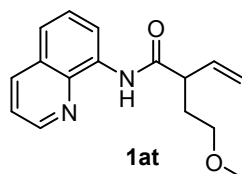

$R_f = 0.5$ , Petroleum Ether: Ethyl Acetate = 5: 1 (v/v)

Compound **1at** was prepared following the general procedure in 13% yield (0.36 g) as a yellow oil.

$^1\text{H}$  NMR (400 MHz, Chloroform-*d*)  $\delta$  10.02 (s, 1H), 8.86 – 8.71 (m, 2H), 8.12 (dd,  $J = 8.3, 1.7$  Hz, 1H), 7.53 – 7.44 (m, 2H), 7.42 (dd,  $J = 8.3, 4.2$  Hz, 1H), 6.02 (ddd,  $J =$

17.1, 10.1, 8.7 Hz, 1H), 5.42 – 5.24 (m, 2H), 3.52 – 3.40 (m, 3H), 3.32 (s, 3H), 2.27 (ddt,  $J = 13.4, 7.2, 6.3$  Hz, 1H), 1.91 (ddt,  $J = 13.7, 7.5, 6.1$  Hz, 1H).

$^{13}\text{C}$  NMR (101 MHz, Chloroform-*d*)  $\delta$  171.93, 148.27, 138.55, 136.64, 136.39, 134.56, 128.00, 127.42, 121.65, 121.62, 118.31, 116.54, 69.95, 58.73, 49.77, 31.84.

HRMS (ESI-TOF):  $m/z$  Calcd for  $\text{C}_{16}\text{H}_{19}\text{N}_2\text{O}_2^+$  [ $\text{M}+\text{H}^+$ ]: 271.1441; found: 271.1438.

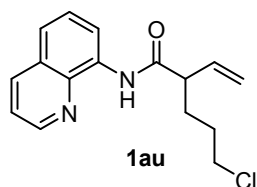

$R_f = 0.5$ , Petroleum Ether: Ethyl Acetate = 15: 1 (v/v)

Compound **1au** was prepared following the general procedure in 10% yield (0.28 g) as a yellow oil.

$^1\text{H}$  NMR (400 MHz, Chloroform-*d*)  $\delta$  10.00 (s, 1H), 8.84 – 8.70 (m, 2H), 8.14 (dd,  $J = 8.3, 1.7$  Hz, 1H), 7.56 – 7.46 (m, 2H), 7.43 (dd,  $J = 8.3, 4.2$  Hz, 1H), 6.01 (ddd,  $J = 17.1, 10.1, 8.6$  Hz, 1H), 5.45 – 5.29 (m, 2H), 3.67 – 3.50 (m, 2H), 3.26 – 3.17 (m, 1H), 2.22 – 2.06 (m, 1H), 1.93 – 1.82 (m, 3H).

$^{13}\text{C}$  NMR (101 MHz, Chloroform-*d*)  $\delta$  171.50, 148.35, 138.58, 136.51, 136.45, 134.44, 128.03, 127.44, 121.75, 121.70, 118.83, 116.57, 52.73, 44.82, 30.38, 29.16.

HRMS (ESI-TOF):  $m/z$  Calcd for  $\text{C}_{16}\text{H}_{18}\text{ClN}_2\text{O}^+$  [ $\text{M}+\text{H}^+$ ]: 289.1102; found: 289.1108.

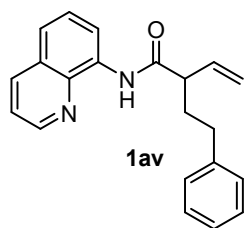

$R_f = 0.3$ , Petroleum Ether: Ethyl Acetate = 10: 1 (v/v)

Compound **1av** was prepared following the general procedure in 9% yield (0.27 g) as a yellow oil.

$^1\text{H}$  NMR (400 MHz, Chloroform-*d*)  $\delta$  10.00 (s, 1H), 8.89 – 8.75 (m, 2H), 8.15 (dd,  $J = 8.2, 1.7$  Hz, 1H), 7.58 – 7.47 (m, 2H), 7.45 (dd,  $J = 8.3, 4.2$  Hz, 1H), 7.33 – 7.19 (m, 5H), 6.07 (ddd,  $J = 17.2, 10.2, 8.7$  Hz, 1H), 5.48 – 5.24 (m, 2H), 3.23 (q,  $J = 7.6$  Hz,

1H), 2.83 – 2.69 (m, 2H), 2.40 (ddt,  $J = 13.6, 9.1, 6.7$  Hz, 1H), 2.02 (dddd,  $J = 13.9, 9.1, 7.6, 6.5$  Hz, 1H).

$^{13}\text{C}$  NMR (101 MHz, Chloroform-*d*)  $\delta$  171.87, 148.31, 148.24, 141.63, 138.61, 136.88, 136.44, 134.54, 128.52, 128.04, 127.49, 126.04, 121.68, 121.67, 118.63, 116.59, 52.67, 33.40, 33.36.

HRMS (ESI-TOF):  $m/z$  Calcd for  $\text{C}_{21}\text{H}_{21}\text{N}_2\text{O}^+$  [ $\text{M}+\text{H}^+$ ]: 317.1648; found: 317.1654.

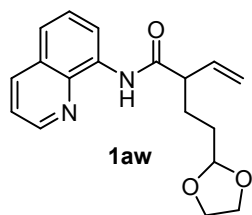

$R_f = 0.4$ , Petroleum Ether: Ethyl Acetate = 5: 1 (v/v)

Compound **1aw** was prepared following the general procedure in 13% yield (0.42 g) as a yellow oil.

$^1\text{H}$  NMR (400 MHz, Chloroform-*d*)  $\delta$  10.00 (s, 1H), 8.83 – 8.72 (m, 2H), 8.12 (dd,  $J = 8.3, 1.7$  Hz, 1H), 7.54 – 7.45 (m, 2H), 7.42 (dd,  $J = 8.3, 4.2$  Hz, 1H), 6.01 (ddd,  $J = 17.1, 10.1, 8.6$  Hz, 1H), 5.43 – 5.24 (m, 2H), 4.92 (t,  $J = 4.4$  Hz, 1H), 4.01 – 3.89 (m, 2H), 3.88 – 3.77 (m, 2H), 3.26 (q,  $J = 7.8, 7.3$  Hz, 1H), 2.21 – 2.07 (m, 1H), 1.87 – 1.71 (m, 3H).

$^{13}\text{C}$  NMR (101 MHz, Chloroform-*d*)  $\delta$  171.91, 148.25, 138.56, 136.82, 136.43, 134.54, 128.01, 127.45, 121.63, 121.61, 118.45, 116.58, 104.41, 65.02, 64.97, 52.99, 31.43, 26.29.

HRMS (ESI-TOF):  $m/z$  Calcd for  $\text{C}_{18}\text{H}_{20}\text{N}_2\text{NaO}_3^+$  [ $\text{M}+\text{Na}^+$ ]: 335.1366; found: 335.1367.

### 4.3 General procedure for the substrate **1ax**, **1ay**'<sup>[20-21]</sup>

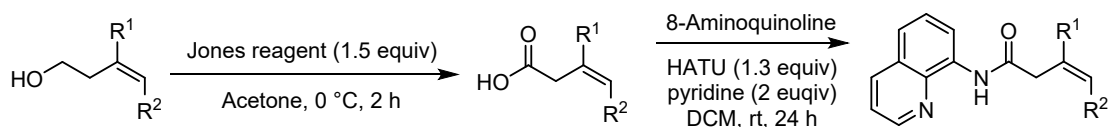

Scheme S4. Synthesis of substrate **1ax**, **1ay**'

Step 1: 3-methylbut-3-en-1-ol (10 mmol, 1 equiv) or (*Z*)-hex-3-en-1-ol (10 mmol, 1 equiv) in acetone (50 mL) was added 2.5 M Jones reagent (6 mL, 15 mmol, 1.5 equiv) dropwisely for 10 min at 0 °C. The reaction was stirred at 0 °C for 2 h. The reaction mixture was quenched with 2-propanol at 0 °C, diluted with water, and basified with 10% NaOH solution (25 mL) at 0 °C. The aqueous layer was washed with DCM (50 mL), acidified with conc. HCl to pH = 2 under ice cooling, and then extracted with DCM (50 mL, ×2). The combined organic layer was dried over Na<sub>2</sub>SO<sub>4</sub> and concentrated under reduced pressure to afford the crude product, which was used in the next step without further purification.

Step 2:  $\beta$ -Substituted or  $\gamma$ -substituted vinyl acetic acid (12 mmol, 1.2 equiv) was charged into a 150 mL flask containing 30 mL DCM. 8-Aminoquinoline (1.44 g, 10 mmol, 1 equiv), pyridine (2.6 mL, 20 mmol, 2 equiv), and HATU (4.94 g, 13 mmol, 1.3 equiv) were added sequentially, and the reaction was stirred at room temperature for 24 h. The deep brown solution was diluted with DCM (100 mL), washed with sat. NaHCO<sub>3</sub> (100 mL, ×2) and brine (100 mL, ×2). The organic layer was evaporated under reduced pressure and the residue was purified by column chromatography on silica gel (200 - 300 mesh), eluting with 10% EtOAc/petroleum ether to give the desire product.

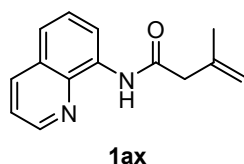

$R_f$  = 0.3, Petroleum Ether: Ethyl Acetate = 10: 1 (v/v)

Compound **1ax** was prepared following the general procedure in 19% yield (0.42 g) as a yellow oil.

<sup>1</sup>H NMR (400 MHz, Chloroform-*d*)  $\delta$  10.05 (s, 1H), 8.81 – 8.68 (m, 2H), 8.10 (dd,  $J$  = 8.3, 1.7 Hz, 1H), 7.53 – 7.43 (m, 2H), 7.40 (dd,  $J$  = 8.3, 4.2 Hz, 1H), 5.15 – 5.03 (m, 2H), 3.28 (d,  $J$  = 1.1 Hz, 2H), 1.91 (t,  $J$  = 1.2 Hz, 3H).

<sup>13</sup>C NMR (101 MHz, Chloroform-*d*)  $\delta$  169.19, 148.31, 139.86, 138.56, 136.29, 134.45, 127.94, 127.35, 121.59, 116.41, 115.96, 47.91, 22.58.

**HRMS** (ESI-TOF):  $m/z$  Calcd for  $C_{14}H_{14}N_2NaO^+$   $[M+Na^+]$ : 249.0998; found: 249.0997.

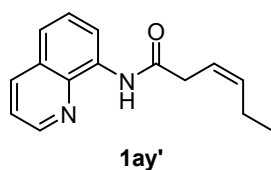

$R_f = 0.4$ , Petroleum Ether: Ethyl Acetate = 10: 1 (v/v)

Compound **1ay'** was prepared following the general procedure in 22% yield (0.52 g) as a yellow oil.

**$^1H$  NMR** (400 MHz, Chloroform-*d*)  $\delta$  10.03 (s, 1H), 8.81 – 8.70 (m, 2H), 8.07 (dd,  $J = 8.3, 1.7$  Hz, 1H), 7.51 – 7.40 (m, 2H), 7.37 (dd,  $J = 8.3, 4.2$  Hz, 1H), 5.85 – 5.68 (m, 2H), 3.32 (dd,  $J = 7.3, 1.1$  Hz, 2H), 2.18 (pd,  $J = 7.5, 1.4$  Hz, 2H), 1.05 (t,  $J = 7.5$  Hz, 3H).

**$^{13}C$  NMR** (101 MHz, Chloroform-*d*)  $\delta$  169.63, 148.17, 138.48, 137.11, 136.22, 134.45, 127.88, 127.30, 121.53, 121.50, 120.68, 116.36, 36.77, 20.84, 13.95.

**HRMS** (ESI-TOF):  $m/z$  Calcd for  $C_{15}H_{17}N_2O^+$   $[M+H^+]$ : 241.1335; found: 241.1337.

#### 4.4 General procedure for amide bond formation<sup>[21-24]</sup>

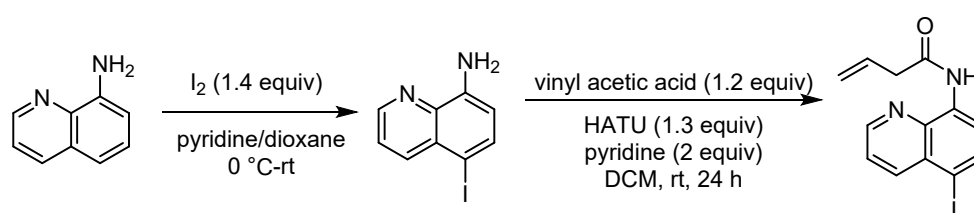

**Scheme S5. Synthesis of substrate 1ba (1-IQ)**

Step 1: The 8-aminoquinoline (20 g, 0.14 mol, 1 equiv) was dissolved in dioxane (150 mL) and pyridine (150 mL) and the solution was cooled to 0°C. Iodine (40 g, 0.16 mol, 1.14 equiv) was added in one portion. The solution progressively took a dark brown color. After 1 h, the ice bath was removed and a supplementary portion of iodine (10g, 0.04 mol) was added. The solution was further stirred for one hour at room temperature. A saturated solution of sodium thiosulfate was then added until the

brown color disappeared. The mixture was extracted with DCM (200mL, ×3) and washed with water, and dried by Na<sub>2</sub>SO<sub>4</sub>. The solvent was evaporated under reduced pressure and the residue was purified by column chromatography on silica gel (200 - 300 mesh), eluting with 10% EtOAc/petroleum ether to give the target compound as a bright yellow solid (28.2 g, 0.1 mol, 75% yield).

Step 2: Vinyl acetic acid (12 mmol, 1.2 equiv) was charged into a 150 mL flask containing 30 mL DCM. 5-Iodo-8-aminoquinoline (2.7 g, 10 mmol, 1 equiv), pyridine (2.6 mL, 20 mmol, 2 equiv), and HATU (4.94 g, 13 mmol, 1.3 equiv) were added sequentially, and the reaction was stirred at room temperature for 24 h. The deep brown solution was diluted with DCM (100 mL), washed with sat. NaHCO<sub>3</sub> (100 mL, ×2) and brine (100 mL, ×2). The organic layer was evaporated under reduced pressure and the residue was purified by column chromatography on silica gel (200 - 300 mesh), eluting with 10% EtOAc/petroleum ether to give the desire product.

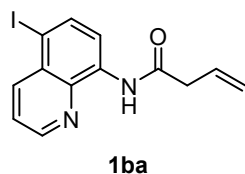

R<sub>f</sub> = 0.4, Petroleum Ether: Ethyl Acetate = 10: 1 (v/v)

Compound **1ba** was prepared following the general procedure in 80% yield (2.70 g) as a yellow solid. m.p. 78-80 °C.

<sup>1</sup>H NMR (400 MHz, Chloroform-*d*) δ 9.97 (s, 1H), 8.77 (dd, *J* = 4.2, 1.6 Hz, 1H), 8.54 (d, *J* = 8.3 Hz, 1H), 8.36 (dd, *J* = 8.5, 1.6 Hz, 1H), 8.07 (d, *J* = 8.3 Hz, 1H), 7.53 (dd, *J* = 8.5, 4.2 Hz, 1H), 6.13 (ddt, *J* = 16.6, 10.4, 7.1 Hz, 1H), 5.44 – 5.34 (m, 2H), 3.35 (dt, *J* = 7.1, 1.3 Hz, 2H).

<sup>13</sup>C NMR (101 MHz, Chloroform-*d*) δ 169.46, 148.95, 140.85, 139.21, 138.38, 135.41, 130.87, 129.72, 123.28, 120.45, 117.96, 89.55, 43.32.

HRMS (ESI-TOF): *m/z* Calcd for C<sub>13</sub>H<sub>12</sub>IN<sub>2</sub>O<sup>+</sup> [M+H<sup>+</sup>]: 338.9989; found: 338.9989.

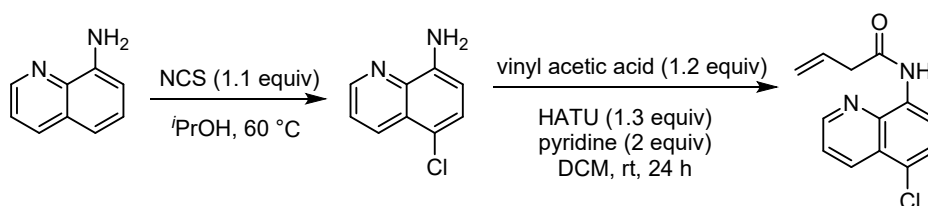

### Scheme S6. Synthesis of substrate **1c** (1-ClQ)

Step 1: *N*-Chlorosuccinimide (2.5 g, 19.1 mmol, 1.1 equiv) was added in one portion to a solution of 8-aminoquinoline (2.5g, 17.3 mmol, 1 equiv) in *i*PrOH (25 mL) at 60 °C. The reaction mixture was heated at reflux for 3 h. Saturated aqueous NaHCO<sub>3</sub> solution was added and the mixture was extracted with DCM (30 mL, ×3), washed with brine and dried by Na<sub>2</sub>SO<sub>4</sub>. The solvent was removed under reduced pressure to give a brown solid. Purified by column chromatography on silica gel (200 - 300 mesh), eluting with 20% EtOAc/petroleum ether to give the target compound as a bright yellow solid. (1.2g, 40% yield)

Step 2: Vinyl acetic acid (12 mmol, 1.2 equiv) was charged into a 150 mL flask containing 30 mL DCM. 5-Chloro-8-aminoquinoline (1.8 g, 10 mmol, 1 equiv), pyridine (2.6 mL, 20 mmol, 2 equiv), and HATU (4.94 g, 13 mmol, 1.3 equiv) were added sequentially, and the reaction was stirred at room temperature for 24 h. The deep brown solution was diluted with DCM (100 mL), washed with sat. NaHCO<sub>3</sub> (100 mL, ×2) and brine (100 mL, ×2). The organic layer was evaporated under reduced pressure and the residue was purified by column chromatography on silica gel (200 - 300 mesh), eluting with 10% EtOAc/petroleum ether to give the desire product.

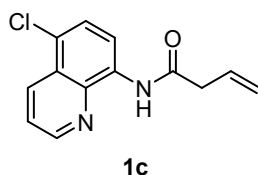

R<sub>f</sub> = 0.5, Petroleum Ether: Ethyl Acetate = 10: 1 (v/v)

Compound **1c** was prepared following the general procedure in 62% yield (1.53 g) as a white solid. m.p. 80-82 °C.

<sup>1</sup>H NMR (400 MHz, Chloroform-*d*) δ 9.82 (s, 1H), 8.75 (dd, *J* = 4.3, 1.7 Hz, 1H), 8.63 (d, *J* = 8.4 Hz, 1H), 8.43 (dd, *J* = 8.5, 1.7 Hz, 1H), 7.52 – 7.42 (m, 2H), 6.11 (ddt, *J* = 16.5, 10.4, 7.1 Hz, 1H), 5.43 – 5.29 (m, 2H), 3.32 (dt, *J* = 7.1, 1.3 Hz, 2H).

<sup>13</sup>C NMR (101 MHz, Chloroform-*d*) δ 169.18, 148.64, 138.87, 133.58, 133.20, 130.82, 127.10, 125.76, 124.26, 122.26, 120.26, 116.24, 43.13.



**HRMS** (ESI-TOF):  $m/z$  Calcd for  $C_{13}H_{12}ClN_2O^+$   $[M+H]^+$ : 247.0633; found: 247.0631.

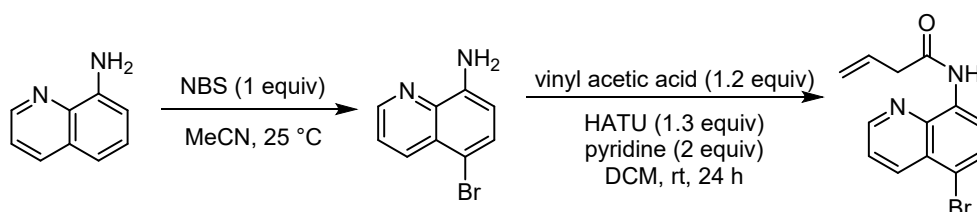

**Scheme S7. Synthesis of substrate 1d (1-BrQ)**

Step 1: *N*-Bromosuccinimide (6.1 g, 34.7 mmol, 1 equiv) was added to a solution of 8-aminoquinoline (5.0 g, 34.7 mmol, 1 equiv) in MeCN (80 mL). The reaction was stirred for 30 min at 25 °C. The reaction was quenched with saturated aqueous NaHCO<sub>3</sub> solution (100 mL) and dried by Na<sub>2</sub>SO<sub>4</sub>. The solvent was evaporated under reduced pressure and the residue was purified by column chromatography on silica gel (200 - 300 mesh), eluting with 20% EtOAc/petroleum ether to give the target compound as a yellow solid (3.8 g, 17 mmol, 50% yield).

Step 2: Vinyl acetic acid (12 mmol, 1.2 equiv) was charged into a 150 mL flask containing 30 mL DCM. 5-Bromo-8-aminoquinoline (2.2 g, 10 mmol, 1 equiv), pyridine (2.6 mL, 20 mmol, 2 equiv), and HATU (4.94 g, 13 mmol, 1.3 equiv) were added sequentially, and the reaction was stirred at room temperature for 24 h. The deep brown solution was diluted with DCM (100 mL), washed with sat. NaHCO<sub>3</sub> (100 mL, ×2) and brine (100 mL, ×2). The organic layer was evaporated under reduced pressure and the residue was purified by column chromatography on silica gel (200 - 300 mesh), eluting with 10% EtOAc/petroleum ether to give the desired product.

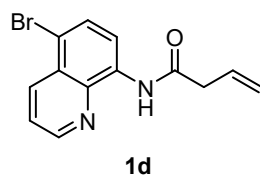

$R_f = 0.5$ , Petroleum Ether: Ethyl Acetate = 10: 1 (v/v)

Compound **1d** was prepared following the general procedure in 82% yield (2.38 g) as

a yellow solid. m.p. 74-76 °C.

**<sup>1</sup>H NMR** (400 MHz, Chloroform-*d*) δ 9.94 (s, 1H), 8.82 (dd, *J* = 4.3, 1.6 Hz, 1H), 8.67 (d, *J* = 8.4 Hz, 1H), 8.52 (dd, *J* = 8.5, 1.6 Hz, 1H), 7.79 (d, *J* = 8.4 Hz, 1H), 7.56 (dd, *J* = 8.5, 4.2 Hz, 1H), 6.13 (ddt, *J* = 17.2, 10.3, 7.1 Hz, 1H), 5.48 – 5.30 (m, 2H), 3.35 (dt, *J* = 7.1, 1.3 Hz, 2H).

**<sup>13</sup>C NMR** (101 MHz, Chloroform-*d*) δ 169.43, 148.82, 139.26, 136.16, 134.42, 131.06, 130.89, 127.33, 122.78, 120.43, 117.16, 114.45, 43.29.

**HRMS** (ESI-TOF): *m/z* Calcd for C<sub>13</sub>H<sub>12</sub>BrN<sub>2</sub>O<sup>+</sup> [M+H<sup>+</sup>]: 291.0128; found: 291.0132.

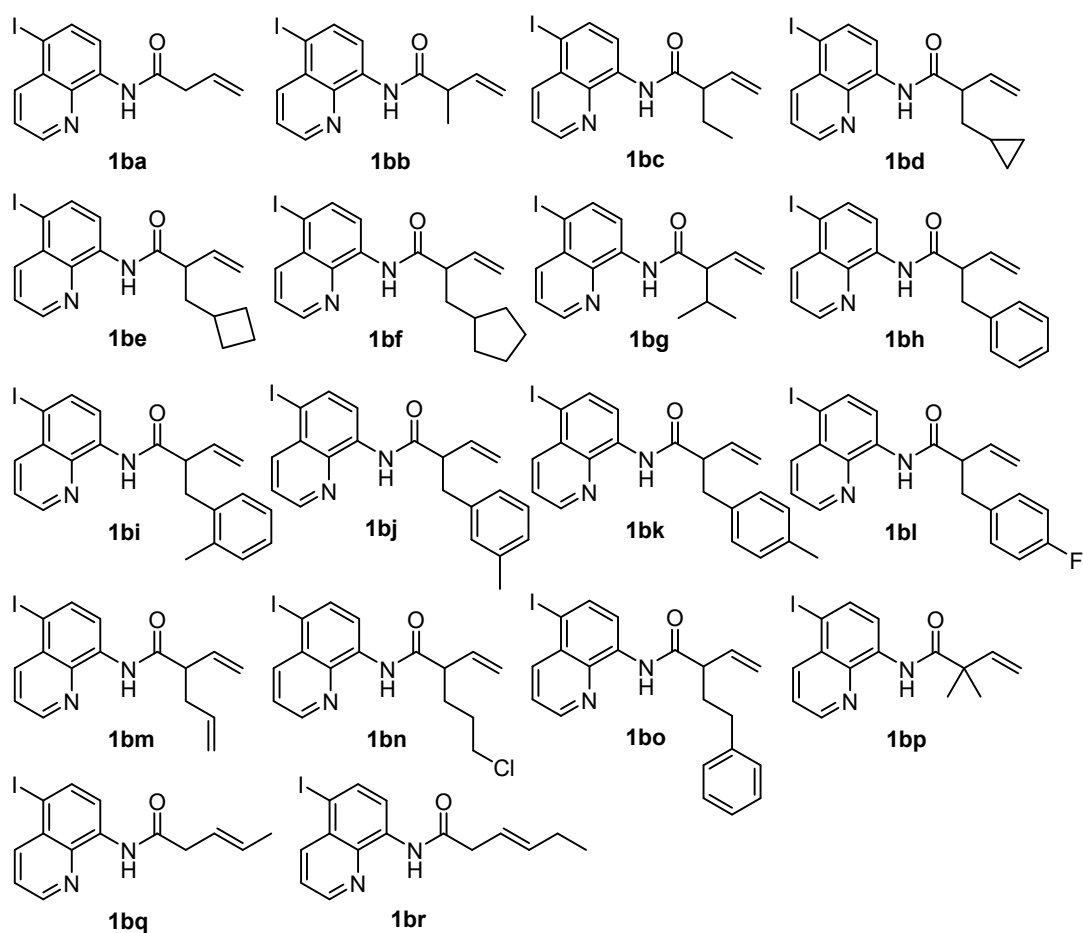

**Scheme S8. Alkene Substrates ( IQ-Directed, Yields are unoptimized)**

#### 4.5 General procedure for the substrate **1bp**, **1bq**, **1br**<sup>[20-21]</sup>

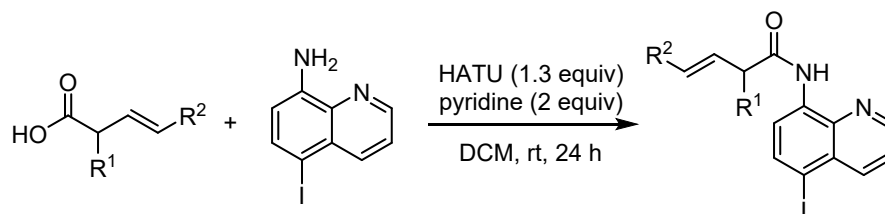

**Scheme S9. Synthesis of substrate **1bp**, **1bq**, **1br****

$\alpha$ -Substituted vinyl acetic acid or  $\gamma$ -substituted vinyl acetic acid (12 mmol, 1.2 equiv, from commercial sources) was charged into a 150 mL flask containing 30 mL DCM. 5-Iodo-8-aminoquinoline (2.7 g, 10 mmol, 1 equiv), pyridine (2.6 mL, 20 mmol, 2 equiv), and HATU (4.94 g, 13 mmol, 1.3 equiv) were added sequentially, and the reaction was stirred at room temperature for 24 h. The deep brown solution was diluted with DCM (100 mL), washed with sat.  $\text{NaHCO}_3$  (100 mL,  $\times 2$ ) and brine (100 mL,  $\times 2$ ). The organic layer was evaporated under reduced pressure and the residue was purified by column chromatography on silica gel (200 - 300 mesh), eluting with 10% EtOAc/petroleum ether to give the desire product.

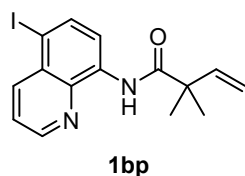

$R_f = 0.3$ , Petroleum Ether: Ethyl Acetate = 10: 1 (v/v)

Compound **1bp** was prepared following the general procedure in 65% yield (2.38 g) as a white solid. m.p. 68-70 °C.

**$^1\text{H NMR}$**  (400 MHz, Chloroform-*d*)  $\delta$  10.23 (s, 1H), 8.75 (dd,  $J = 4.2, 1.6$  Hz, 1H), 8.54 (d,  $J = 8.3$  Hz, 1H), 8.33 (dd,  $J = 8.5, 1.6$  Hz, 1H), 8.05 (d,  $J = 8.3$  Hz, 1H), 7.50 (dd,  $J = 8.5, 4.2$  Hz, 1H), 6.22 (dd,  $J = 17.5, 10.6$  Hz, 1H), 5.50 – 5.33 (m, 2H), 1.47 (s, 6H).

**$^{13}\text{C NMR}$**  (101 MHz, Chloroform-*d*)  $\delta$  175.05, 148.98, 142.81, 140.71, 139.57, 138.34, 135.70, 129.67, 123.17, 117.72, 115.31, 89.26, 47.01, 24.93.

**HRMS** (ESI-TOF):  $m/z$  Calcd for  $\text{C}_{15}\text{H}_{16}\text{IN}_2\text{O}^+$  [ $\text{M}+\text{H}^+$ ]: 367.0302; found: 367.0298.

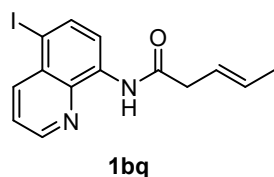

$R_f = 0.5$ , Petroleum Ether: Ethyl Acetate = 10: 1 (v/v)

Compound **1bq** was prepared following the general procedure in 89% yield (3.13 g) as a yellow solid. m.p. 78-80 °C.

**$^1\text{H NMR}$**  (400 MHz, Chloroform-*d*)  $\delta$  10.00 (s, 1H), 8.74 (dd,  $J = 4.3, 1.6$  Hz, 1H), 8.52 (d,  $J = 8.2$  Hz, 1H), 8.33 (dd,  $J = 8.5, 1.6$  Hz, 1H), 8.04 (d,  $J = 8.3$  Hz, 1H), 7.50 (dd,  $J = 8.5, 4.2$  Hz, 1H), 5.90 – 5.63 (m, 2H), 3.25 (dd,  $J = 6.6, 1.5$  Hz, 2H), 1.82 (dd,  $J = 5.9, 1.3$  Hz, 3H).

**$^{13}\text{C NMR}$**  (101 MHz, Chloroform-*d*)  $\delta$  170.23, 148.86, 140.77, 139.15, 138.34, 135.43, 131.69, 129.64, 123.36, 123.19, 117.82, 89.36, 42.19, 18.23.

**HRMS** (ESI-TOF):  $m/z$  Calcd for  $\text{C}_{14}\text{H}_{13}\text{IN}_2\text{NaO}^+$  [ $\text{M}+\text{Na}^+$ ]: 374.9965; found: 374.9967.

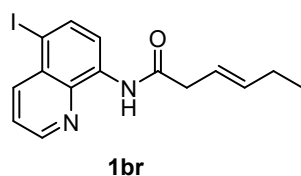

$R_f = 0.4$ , Petroleum Ether: Ethyl Acetate = 10: 1 (v/v)

Compound **1br** was prepared following the general procedure in 82% yield (3.00 g) as a yellow solid. m.p. 83-85 °C.

**$^1\text{H NMR}$**  (400 MHz, Chloroform-*d*)  $\delta$  10.07 (s, 1H), 8.72 (dd,  $J = 4.2, 1.6$  Hz, 1H), 8.53 (d,  $J = 8.2$  Hz, 1H), 8.33 (dd,  $J = 8.5, 1.6$  Hz, 1H), 8.04 (d,  $J = 8.3$  Hz, 1H), 7.50 (dd,  $J = 8.5, 4.2$  Hz, 1H), 5.87 (dtt,  $J = 15.0, 6.2, 1.1$  Hz, 1H), 5.72 (dtt,  $J = 15.5, 7.2, 1.5$  Hz, 1H), 3.26 (dd,  $J = 7.0, 1.2$  Hz, 2H), 2.19 (qdd,  $J = 7.5, 6.3, 1.3$  Hz, 2H), 1.12 (t,  $J = 7.5$  Hz, 3H).

**$^{13}\text{C NMR}$**  (101 MHz, Chloroform-*d*)  $\delta$  170.27, 148.78, 140.75, 139.19, 139.08, 138.35, 135.45, 129.65, 123.19, 121.27, 117.78, 89.35, 42.19, 25.91, 13.70.

**HRMS** (ESI-TOF):  $m/z$  Calcd for  $\text{C}_{15}\text{H}_{16}\text{IN}_2\text{O}^+$  [ $\text{M}+\text{H}^+$ ]: 367.0302; found: 367.0308.

#### 4.6 General procedure for the substrate **1bb-1bo**<sup>[20-21]</sup>

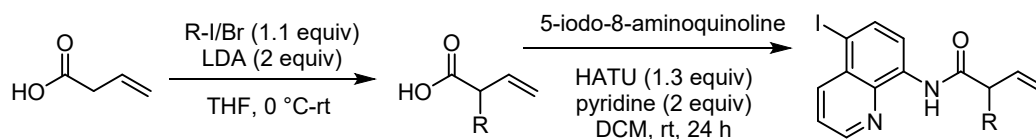

**Scheme S10. Synthesis of substrate **1bb-1bo****

Step1: A solution of commercial LDA 2 M (11.8 mL, 23.5 mmol, 2 equiv) in THF was cooled to ice-water temperature and a solution of 3-butenoic acid (1 mL, 11.77 mmol, 1 equiv) in 10 mL of THF was added slowly over a period of 15 min. The resulting mixture was stirred at the 0°C for 45 min to obtain a deep yellow solution. A total of R-I/Br (12.9 mmol, 1.1 equiv) of the alkylating agent was added, whereupon the reaction mixture immediately turned colorless. After 30 min at the same temperature and 3 h at room temperature, the pH of the solution was adjusted to 2.5 with 10% HCl. The organic phase was separated. The aqueous layer was saturated with solid NaCl and the mixture was extracted with DCM. The combined organic layers were dried over anhydrous Na<sub>2</sub>SO<sub>4</sub>, filtered and concentrated *in vacuo* to obtain the  $\alpha$ -substituted 3-butenoic acid.

Step 2:  $\alpha$ -Substituted vinyl acetic acid (12 mmol, 1.2 equiv) was charged into a 150 mL flask containing 30 mL DCM. 5-Iodo-8-aminoquinoline (2.7 g, 10 mmol, 1 equiv), pyridine (2.6 mL, 20 mmol, 2 equiv), and HATU (4.94 g, 13 mmol, 1.3 equiv) were added sequentially, and the reaction was stirred at room temperature for 24 h. The deep brown solution was diluted with DCM (100 mL), washed with sat. NaHCO<sub>3</sub> (100 mL,  $\times 2$ ) and brine (100 mL,  $\times 2$ ). The organic layer was evaporated under reduced pressure and the residue was purified by column chromatography on silica gel (200 - 300 mesh), eluting with 5%-15% EtOAc/petroleum ether to give the desire product.

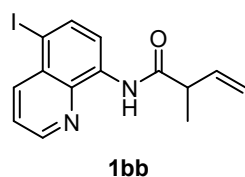

$R_f = 0.6$ , Petroleum Ether: Ethyl Acetate = 10: 1 (v/v)

Compound **1bb** was prepared following the general procedure in 52% yield (1.62 g) as a yellow solid. m.p. 60-62 °C.

**<sup>1</sup>H NMR** (400 MHz, Chloroform-*d*)  $\delta$  9.98 (s, 1H), 8.71 (dd,  $J = 4.2, 1.6$  Hz, 1H), 8.51 (d,  $J = 8.3$  Hz, 1H), 8.27 (dd,  $J = 8.5, 1.6$  Hz, 1H), 8.00 (d,  $J = 8.3$  Hz, 1H), 7.45 (dd,  $J = 8.5, 4.2$  Hz, 1H), 6.08 (ddd,  $J = 17.3, 10.2, 7.9$  Hz, 1H), 5.43 – 5.26 (m, 2H), 3.41 – 3.27 (m, 1H), 1.43 (d,  $J = 7.0$  Hz, 3H).

**<sup>13</sup>C NMR** (101 MHz, Chloroform-*d*)  $\delta$  172.55, 148.80, 140.60, 139.09, 138.20, 137.83, 135.39, 129.50, 123.12, 117.72, 117.59, 89.35, 47.05, 16.94.

**HRMS** (ESI-TOF):  $m/z$  Calcd for  $C_{14}H_{13}IN_2NaO^+$  [ $M+Na^+$ ]: 374.9965; found: 374.9968.

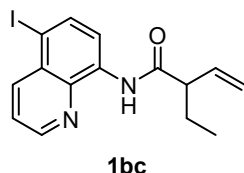

$R_f = 0.5$ , Petroleum Ether: Ethyl Acetate = 10: 1 (v/v)

Compound **1bc** was prepared following the general procedure in 42% yield (1.54 g) as a yellow solid. m.p. 74-75 °C.

**<sup>1</sup>H NMR** (400 MHz, Chloroform-*d*)  $\delta$  9.98 (s, 1H), 8.77 (dd,  $J = 4.3, 1.6$  Hz, 1H), 8.57 (d,  $J = 8.3$  Hz, 1H), 8.36 (dd,  $J = 8.5, 1.6$  Hz, 1H), 8.07 (d,  $J = 8.3$  Hz, 1H), 7.53 (dd,  $J = 8.5, 4.2$  Hz, 1H), 6.00 (ddd,  $J = 17.1, 10.2, 8.6$  Hz, 1H), 5.44 – 5.23 (m, 2H), 3.09 (q,  $J = 7.5$  Hz, 1H), 2.03 (tt,  $J = 13.8, 7.3$  Hz, 1H), 1.72 (dp,  $J = 13.6, 7.5$  Hz, 1H), 1.01 (t,  $J = 7.4$  Hz, 3H).

**<sup>13</sup>C NMR** (101 MHz, Chloroform-*d*)  $\delta$  172.34, 148.91, 140.86, 139.26, 138.40, 136.73, 135.54, 129.72, 123.25, 118.55, 117.95, 89.36, 55.23, 25.13, 11.92.

**HRMS** (ESI-TOF):  $m/z$  Calcd for  $C_{15}H_{15}IN_2NaO^+$  [ $M+Na^+$ ]: 389.0121; found: 389.0118.

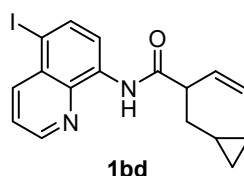

$R_f = 0.4$ , Petroleum Ether: Ethyl Acetate = 10: 1 (v/v)

Compound **1bd** was prepared following the general procedure in 27% yield (1.06 g) as a yellow solid. m.p. 65-67 °C.

**$^1\text{H NMR}$**  (400 MHz, Chloroform-*d*)  $\delta$  10.01 (s, 1H), 8.77 (dd,  $J = 4.2, 1.6$  Hz, 1H), 8.56 (d,  $J = 8.3$  Hz, 1H), 8.36 (dd,  $J = 8.5, 1.6$  Hz, 1H), 8.06 (d,  $J = 8.3$  Hz, 1H), 7.52 (dd,  $J = 8.5, 4.2$  Hz, 1H), 6.07 (ddd,  $J = 17.1, 10.2, 8.6$  Hz, 1H), 5.42 – 5.26 (m, 2H), 3.31 (q,  $J = 7.5$  Hz, 1H), 1.82 (dt,  $J = 14.4, 7.3$  Hz, 1H), 1.68 (dt,  $J = 13.9, 6.9$  Hz, 1H), 0.85 – 0.74 (m, 1H), 0.54 – 0.37 (m, 2H), 0.20 – 0.06 (m, 2H).

**$^{13}\text{C NMR}$**  (101 MHz, Chloroform-*d*)  $\delta$  172.34, 148.91, 140.84, 139.26, 138.41, 136.99, 135.56, 129.71, 123.24, 118.13, 117.93, 89.35, 54.07, 37.33, 9.14, 4.85, 4.74.

**HRMS** (ESI-TOF):  $m/z$  Calcd for  $\text{C}_{17}\text{H}_{18}\text{IN}_2\text{O}^+$  [ $\text{M}+\text{H}^+$ ]: 393.0458; found: 393.0462.

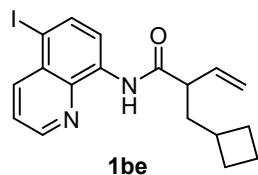

$R_f = 0.5$ , Petroleum Ether: Ethyl Acetate = 10: 1 (v/v)

Compound **1be** was prepared following the general procedure in 17% yield (0.69 g) as a yellow solid. m.p. 58-60 °C.

**$^1\text{H NMR}$**  (400 MHz, Chloroform-*d*)  $\delta$  9.94 (s, 1H), 8.76 (dd,  $J = 4.2, 1.6$  Hz, 1H), 8.55 (d,  $J = 8.3$  Hz, 1H), 8.34 (dd,  $J = 8.5, 1.6$  Hz, 1H), 8.05 (d,  $J = 8.3$  Hz, 1H), 7.51 (dd,  $J = 8.5, 4.2$  Hz, 1H), 5.99 (ddd,  $J = 17.1, 10.1, 8.6$  Hz, 1H), 5.37 – 5.23 (m, 2H), 3.17 – 3.05 (m, 1H), 2.40 (hept,  $J = 7.9$  Hz, 1H), 2.15 – 1.97 (m, 3H), 1.89 – 1.74 (m, 3H), 1.71 – 1.60 (m, 2H).

**$^{13}\text{C NMR}$**  (101 MHz, Chloroform-*d*)  $\delta$  172.33, 148.90, 140.80, 139.22, 138.37, 136.99, 135.51, 129.68, 123.22, 118.05, 117.90, 89.35, 51.83, 39.21, 34.02, 28.63, 28.35, 18.60.

**HRMS** (ESI-TOF):  $m/z$  Calcd for  $\text{C}_{18}\text{H}_{19}\text{IN}_2\text{NaO}^+$  [ $\text{M}+\text{Na}^+$ ]: 429.0434; found: 429.0436.

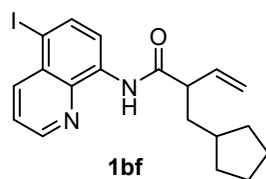

$R_f = 0.6$ , Petroleum Ether: Ethyl Acetate = 10: 1 (v/v)

Compound **1bf** was prepared following the general procedure in 21% yield (0.88 g) as a yellow solid. m.p. 65-67 °C.

**<sup>1</sup>H NMR** (400 MHz, Chloroform-*d*)  $\delta$  9.98 (s, 1H), 8.78 (dd,  $J = 4.3, 1.6$  Hz, 1H), 8.56 (d,  $J = 8.3$  Hz, 1H), 8.36 (dd,  $J = 8.5, 1.6$  Hz, 1H), 8.06 (d,  $J = 8.3$  Hz, 1H), 7.53 (dd,  $J = 8.5, 4.2$  Hz, 1H), 6.00 (ddd,  $J = 17.1, 10.1, 8.7$  Hz, 1H), 5.40 – 5.24 (m, 2H), 3.22 (q,  $J = 7.8$  Hz, 1H), 2.00 (dt,  $J = 13.2, 7.1$  Hz, 1H), 1.94 – 1.76 (m, 3H), 1.72 (ddd,  $J = 13.2, 8.0, 6.1$  Hz, 1H), 1.63 – 1.58 (m, 2H), 1.55 – 1.45 (m, 2H), 1.24 – 1.07 (m, 2H).

**<sup>13</sup>C NMR** (101 MHz, Chloroform-*d*)  $\delta$  172.53, 148.93, 140.85, 139.27, 138.40, 137.24, 135.56, 129.72, 123.25, 118.09, 117.95, 89.34, 53.00, 38.39, 37.79, 33.05, 32.48, 25.32, 25.26.

**HRMS** (ESI-TOF):  $m/z$  Calcd for  $C_{19}H_{22}IN_2O^+$  [ $M+H^+$ ]: 421.0771; found: 421.0768.

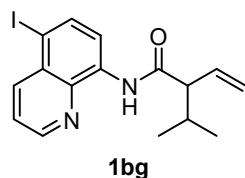

$R_f = 0.4$ , Petroleum Ether: Ethyl Acetate = 10: 1 (v/v)

Compound **1bg** was prepared following the general procedure in 12% yield (0.34 g) as a yellow oil.

**<sup>1</sup>H NMR** (400 MHz, Chloroform-*d*)  $\delta$  9.91 (s, 1H), 8.76 (dd,  $J = 4.2, 1.6$  Hz, 1H), 8.57 (d,  $J = 8.3$  Hz, 1H), 8.34 (dd,  $J = 8.5, 1.6$  Hz, 1H), 8.05 (d,  $J = 8.3$  Hz, 1H), 7.51 (dd,  $J = 8.5, 4.2$  Hz, 1H), 6.08 – 5.96 (m, 1H), 5.35 – 5.26 (m, 2H), 2.86 (dd,  $J = 9.4, 8.0$  Hz, 1H), 2.27 (dp,  $J = 8.0, 6.6$  Hz, 1H), 1.03 (d,  $J = 6.7$  Hz, 3H), 0.99 (d,  $J = 6.7$  Hz, 3H).

**<sup>13</sup>C NMR** (101 MHz, Chloroform-*d*)  $\delta$  172.28, 148.87, 140.80, 139.18, 138.35, 135.58, 135.46, 129.66, 123.22, 119.14, 117.93, 89.36, 61.46, 30.38, 21.14, 19.79.



**HRMS** (ESI-TOF):  $m/z$  Calcd for  $C_{16}H_{18}IN_2O^+$   $[M+H^+]$ : 381.0458; found: 381.0465.

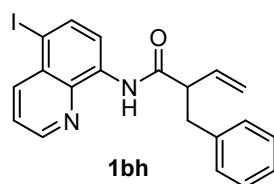

$R_f$  = 0.5, Petroleum Ether: Ethyl Acetate = 8: 1 (v/v)

Compound **1bh** was prepared following the general procedure in 61% yield (2.61 g) as a white solid. m.p. 88-90 °C.

**$^1H$  NMR** (400 MHz, Chloroform-*d*)  $\delta$  9.93 (s, 1H), 8.73 (dd,  $J$  = 4.3, 1.6 Hz, 1H), 8.57 (d,  $J$  = 8.3 Hz, 1H), 8.35 (dd,  $J$  = 8.5, 1.6 Hz, 1H), 8.07 (d,  $J$  = 8.3 Hz, 1H), 7.51 (dd,  $J$  = 8.5, 4.2 Hz, 1H), 7.27 (d,  $J$  = 1.6 Hz, 4H), 7.18 (ddd,  $J$  = 8.7, 5.0, 3.7 Hz, 1H), 6.12 – 5.99 (m, 1H), 5.36 – 5.23 (m, 2H), 3.50 (dt,  $J$  = 8.5, 7.1 Hz, 1H), 3.38 (dd,  $J$  = 13.7, 6.9 Hz, 1H), 2.99 (dd,  $J$  = 13.7, 7.5 Hz, 1H).

**$^{13}C$  NMR** (101 MHz, Chloroform-*d*)  $\delta$  171.44, 148.87, 140.77, 139.18, 139.13, 138.33, 136.23, 135.39, 129.66, 129.32, 128.50, 126.47, 123.23, 119.01, 117.93, 89.50, 55.27, 38.20.

**HRMS** (ESI-TOF):  $m/z$  Calcd for  $C_{20}H_{17}IN_2NaO^+$   $[M+Na^+]$ : 451.0278; found: 451.0277.

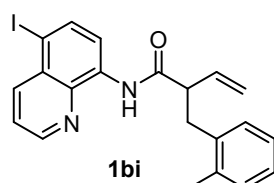

$R_f$  = 0.4, Petroleum Ether: Ethyl Acetate = 8: 1 (v/v)

Compound **1bi** was prepared following the general procedure in 54% yield (2.39 g) as a yellow solid. m.p. 99-101 °C.

**$^1H$  NMR** (400 MHz, Chloroform-*d*)  $\delta$  9.92 (s, 1H), 8.72 (dd,  $J$  = 4.2, 1.5 Hz, 1H), 8.56 (d,  $J$  = 8.2 Hz, 1H), 8.36 (dd,  $J$  = 8.5, 1.5 Hz, 1H), 8.07 (d,  $J$  = 8.3 Hz, 1H), 7.51 (dd,  $J$  = 8.5, 4.2 Hz, 1H), 7.21 – 7.15 (m, 1H), 7.15 – 7.11 (m, 1H), 7.10 – 7.02 (m, 2H), 6.14 – 6.02 (m, 1H), 5.32 – 5.20 (m, 2H), 3.48 (q,  $J$  = 7.6 Hz, 1H), 3.39 (dd,  $J$  = 13.9, 6.7 Hz, 1H), 2.96 (dd,  $J$  = 13.9, 7.5 Hz, 1H), 2.38 (s, 3H).

$^{13}\text{C}$  NMR (101 MHz, Chloroform-*d*)  $\delta$  171.63, 148.76, 140.97, 139.03, 138.41, 137.37, 136.41, 136.31, 135.34, 130.45, 129.94, 129.69, 126.58, 125.98, 123.21, 118.87, 118.09, 89.51, 54.08, 35.32, 19.80.

HRMS (ESI-TOF):  $m/z$  Calcd for  $\text{C}_{21}\text{H}_{19}\text{IN}_2\text{NaO}^+$   $[\text{M}+\text{Na}^+]$ : 465.0434; found: 465.0438.

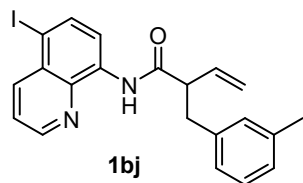

$R_f$  = 0.4, Petroleum Ether: Ethyl Acetate = 8: 1 (v/v)

Compound **1bj** was prepared following the general procedure in 32% yield (1.41 g) as a yellow solid. m.p. 102-104 °C.

$^1\text{H}$  NMR (400 MHz, Chloroform-*d*)  $\delta$  9.90 (s, 1H), 8.71 (dd,  $J$  = 4.3, 1.6 Hz, 1H), 8.55 (dd,  $J$  = 8.3, 1.2 Hz, 1H), 8.33 (dd,  $J$  = 8.5, 1.6 Hz, 1H), 8.05 (dd,  $J$  = 8.3, 1.2 Hz, 1H), 7.49 (dd,  $J$  = 8.5, 4.2 Hz, 1H), 7.14 (t,  $J$  = 7.4 Hz, 1H), 7.11 – 7.02 (m, 2H), 6.97 (d,  $J$  = 7.5 Hz, 1H), 6.05 (dddd,  $J$  = 17.0, 10.0, 8.5, 1.2 Hz, 1H), 5.35 – 5.23 (m, 2H), 3.50 (q,  $J$  = 7.6 Hz, 1H), 3.33 (dd,  $J$  = 13.7, 6.9 Hz, 1H), 2.95 (dd,  $J$  = 13.7, 7.5 Hz, 1H), 2.28 (s, 3H).

$^{13}\text{C}$  NMR (101 MHz, Chloroform-*d*)  $\delta$  171.54, 148.75, 140.82, 139.06, 139.01, 138.34, 138.00, 136.31, 135.34, 130.08, 129.63, 128.36, 127.20, 126.29, 123.18, 118.85, 118.00, 89.46, 55.21, 38.17, 21.49.

HRMS (ESI-TOF):  $m/z$  Calcd for  $\text{C}_{21}\text{H}_{19}\text{IN}_2\text{NaO}^+$   $[\text{M}+\text{Na}^+]$ : 465.0434; found: 465.0434.

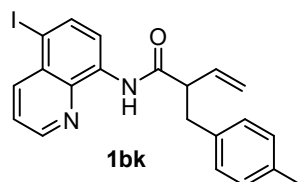

$R_f$  = 0.5, Petroleum Ether: Ethyl Acetate = 10: 1 (v/v)

Compound **1bk** was prepared following the general procedure in 58% yield (2.56 g) as a yellow solid. m.p. 106-108 °C.

**<sup>1</sup>H NMR** (400 MHz, Chloroform-*d*) δ 9.92 (s, 1H), 8.72 (dd, *J* = 4.2, 1.5 Hz, 1H), 8.55 (d, *J* = 8.3 Hz, 1H), 8.34 (dd, *J* = 8.5, 1.6 Hz, 1H), 8.06 (d, *J* = 8.3 Hz, 1H), 7.50 (dd, *J* = 8.5, 4.2 Hz, 1H), 7.16 – 7.11 (m, 2H), 7.05 (d, *J* = 8.0 Hz, 2H), 6.04 (ddd, *J* = 17.0, 10.2, 8.5 Hz, 1H), 5.33 – 5.23 (m, 2H), 3.48 (q, *J* = 7.6 Hz, 1H), 3.32 (dd, *J* = 13.8, 6.9 Hz, 1H), 2.95 (dd, *J* = 13.8, 7.6 Hz, 1H), 2.26 (s, 3H).

**<sup>13</sup>C NMR** (101 MHz, Chloroform-*d*) δ 171.57, 148.76, 140.88, 139.08, 138.38, 136.32, 135.98, 135.91, 135.37, 129.66, 129.19, 129.17, 123.18, 118.89, 118.05, 89.46, 55.31, 37.79, 21.15.

**HRMS** (ESI-TOF): *m/z* Calcd for C<sub>21</sub>H<sub>19</sub>IN<sub>2</sub>NaO<sup>+</sup> [*M*+Na<sup>+</sup>]: 465.0434; found: 465.0434.

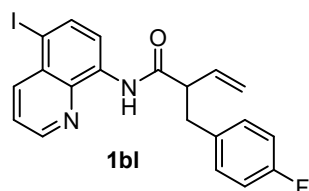

*R<sub>f</sub>* = 0.4, Petroleum Ether: Ethyl Acetate = 15: 1 (v/v)

Compound **1bl** was prepared following the general procedure in 49% yield (2.19 g) as a white solid. m.p. 114-116 °C.

**<sup>1</sup>H NMR** (400 MHz, Chloroform-*d*) δ 9.89 (s, 1H), 8.72 (dd, *J* = 4.2, 1.5 Hz, 1H), 8.53 (d, *J* = 8.3 Hz, 1H), 8.34 (dd, *J* = 8.5, 1.5 Hz, 1H), 8.06 (d, *J* = 8.3 Hz, 1H), 7.51 (dd, *J* = 8.5, 4.2 Hz, 1H), 7.23 – 7.15 (m, 2H), 6.98 – 6.87 (m, 2H), 6.09 – 5.95 (m, 1H), 5.32 – 5.24 (m, 2H), 3.43 (q, *J* = 7.6 Hz, 1H), 3.31 (dd, *J* = 13.8, 7.1 Hz, 1H), 2.95 (dd, *J* = 13.8, 7.3 Hz, 1H).

**<sup>13</sup>C NMR** (101 MHz, Chloroform-*d*) δ 171.23, 162.90, 160.47, 148.91, 140.81, 139.17, 138.33, 136.04, 135.30, 134.79, 130.80, 130.72, 129.70, 123.27, 119.17, 117.95, 115.40, 115.19, 89.61, 55.41, 37.40.

**<sup>19</sup>F NMR** (376 MHz, Chloroform-*d*) δ -116.87.

**HRMS** (ESI-TOF): *m/z* Calcd for C<sub>20</sub>H<sub>17</sub>FIN<sub>2</sub>O<sup>+</sup> [*M*+H<sup>+</sup>]: 447.0364; found: 447.0357.

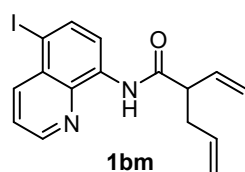

$R_f = 0.5$ , Petroleum Ether: Ethyl Acetate = 15: 1 (v/v)

Compound **1bn** was prepared following the general procedure in 32% yield (1.21 g) as a yellow solid. m.p. 60-62 °C.

**<sup>1</sup>H NMR** (400 MHz, Chloroform-*d*)  $\delta$  10.01 (s, 1H), 8.77 (dd,  $J = 4.2, 1.6$  Hz, 1H), 8.56 (d,  $J = 8.3$  Hz, 1H), 8.37 (dd,  $J = 8.5, 1.6$  Hz, 1H), 8.07 (d,  $J = 8.3$  Hz, 1H), 7.53 (dd,  $J = 8.5, 4.2$  Hz, 1H), 6.02 (ddd,  $J = 17.2, 10.2, 8.6$  Hz, 1H), 5.84 (ddt,  $J = 17.1, 10.2, 7.0$  Hz, 1H), 5.42 – 5.31 (m, 2H), 5.19 – 5.02 (m, 2H), 3.28 (q,  $J = 7.6$  Hz, 1H), 2.80 – 2.69 (m, 1H), 2.54 – 2.42 (m, 1H).

**<sup>13</sup>C NMR** (101 MHz, Chloroform-*d*)  $\delta$  171.45, 148.86, 140.80, 139.14, 138.32, 136.25, 135.36, 135.33, 129.65, 123.20, 118.82, 117.96, 117.29, 89.48, 53.09, 36.14.

**HRMS** (ESI-TOF):  $m/z$  Calcd for  $C_{16}H_{16}IN_2O^+$  [ $M+H^+$ ]: 379.0302; found: 379.0309.

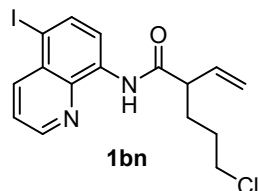

$R_f = 0.4$ , Petroleum Ether: Ethyl Acetate = 20: 1 (v/v)

Compound **1bn** was prepared following the general procedure in 16% yield (0.66 g) as a yellow solid. m.p. 78-80 °C.

**<sup>1</sup>H NMR** (400 MHz, Chloroform-*d*)  $\delta$  10.00 (s, 1H), 8.76 (dd,  $J = 4.2, 1.6$  Hz, 1H), 8.53 (d,  $J = 8.3$  Hz, 1H), 8.35 (dd,  $J = 8.5, 1.6$  Hz, 1H), 8.06 (d,  $J = 8.3$  Hz, 1H), 7.52 (dd,  $J = 8.5, 4.2$  Hz, 1H), 6.00 (ddd,  $J = 17.0, 10.1, 8.6$  Hz, 1H), 5.46 – 5.30 (m, 2H), 3.68 – 3.48 (m, 2H), 3.21 (t,  $J = 7.7$  Hz, 1H), 2.12 (dtd,  $J = 14.8, 9.7, 6.6$  Hz, 1H), 1.98 – 1.77 (m, 3H).

**<sup>13</sup>C NMR** (101 MHz, Chloroform-*d*)  $\delta$  171.55, 148.96, 140.80, 139.20, 138.31, 136.32, 135.35, 129.68, 123.28, 119.15, 117.91, 89.58, 52.76, 44.81, 30.36, 29.05.

**HRMS** (ESI-TOF):  $m/z$  Calcd for  $C_{16}H_{16}ClIN_2NaO^+$  [ $M+Na^+$ ]: 436.9888; found: 436.9884.

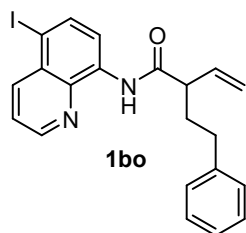

$R_f = 0.3$ , Petroleum Ether: Ethyl Acetate = 10: 1 (v/v)

Compound **1bo** was prepared following the general procedure in 21% yield (0.93 g) as a yellow oil.

$^1\text{H NMR}$  (400 MHz, Chloroform-*d*)  $\delta$  9.98 (s, 1H), 8.77 (dd,  $J = 4.2, 1.6$  Hz, 1H), 8.57 (d,  $J = 8.3$  Hz, 1H), 8.36 (dd,  $J = 8.5, 1.5$  Hz, 1H), 8.07 (d,  $J = 8.3$  Hz, 1H), 7.53 (dd,  $J = 8.5, 4.2$  Hz, 1H), 7.32 – 7.26 (m, 2H), 7.25 – 7.16 (m, 3H), 6.04 (ddd,  $J = 17.2, 10.2, 8.7$  Hz, 1H), 5.43 – 5.31 (m, 2H), 3.24 – 3.14 (m, 1H), 2.82 – 2.65 (m, 2H), 2.37 (ddt,  $J = 13.6, 9.2, 6.7$  Hz, 1H), 2.00 (dddd,  $J = 13.8, 9.0, 7.7, 6.4$  Hz, 1H).

$^{13}\text{C NMR}$  (101 MHz, Chloroform-*d*)  $\delta$  171.94, 148.93, 141.55, 140.84, 139.26, 138.38, 136.69, 135.48, 129.72, 128.70, 128.57, 126.12, 123.27, 118.93, 117.96, 89.46, 52.67, 33.34, 33.28.

**HRMS** (ESI-TOF):  $m/z$  Calcd for  $\text{C}_{21}\text{H}_{19}\text{IN}_2\text{NaO}^+$   $[\text{M}+\text{Na}^+]$ : 465.0434; found: 465.0435.

## 5. General Procedures for the Heck-type Coupling Reactions

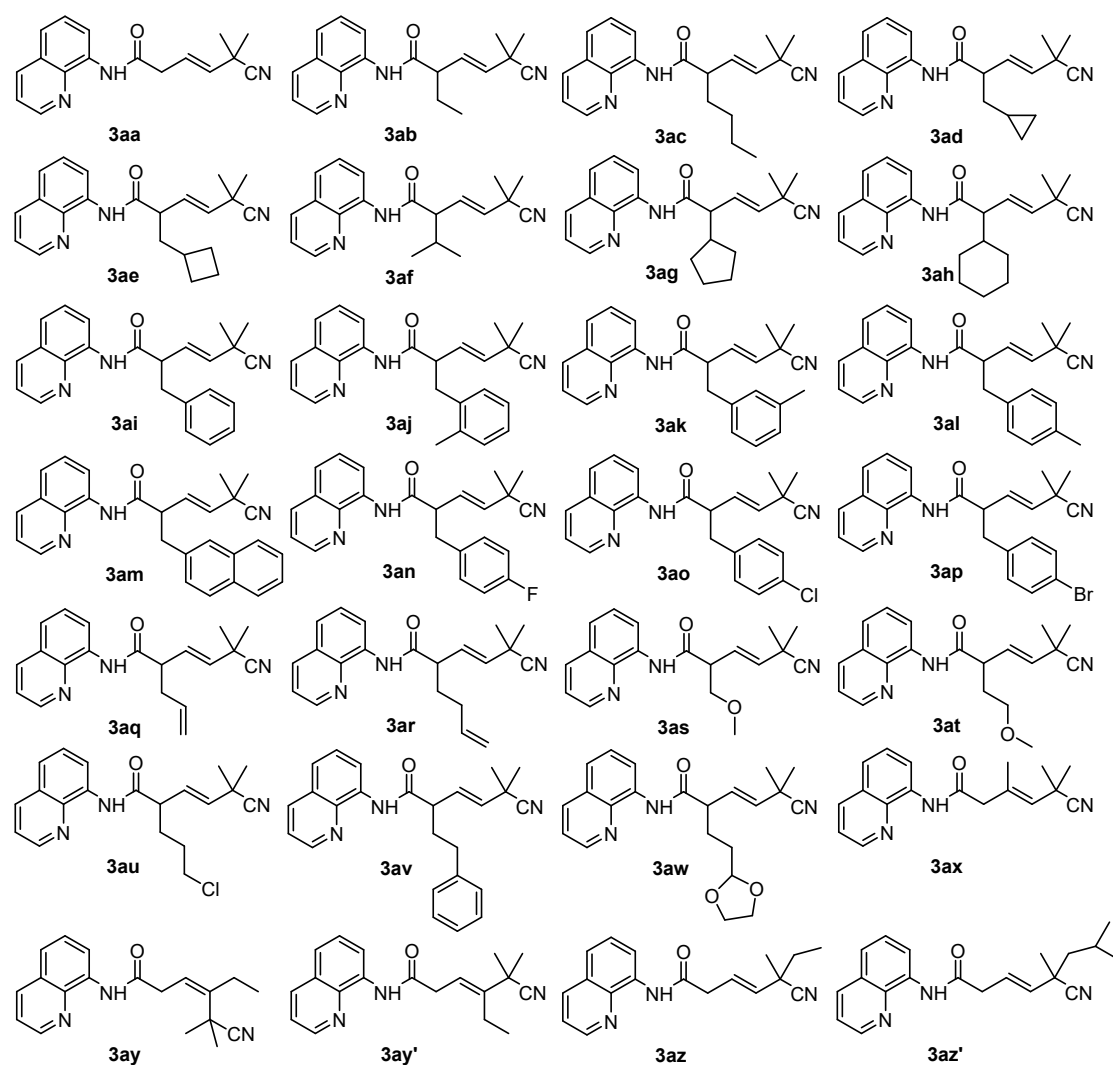

**Scheme S11. Products of the Heck-type Coupling Reactions**

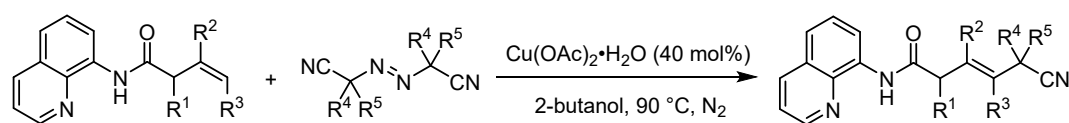

**Scheme S12. Synthesis of products of the Heck-type Coupling Reactions**

The alkenes substrate (0.2 mmol, 1 equiv), azo compounds (0.6 mmol, 3 equiv), Cu(OAc)<sub>2</sub>·H<sub>2</sub>O (16mg, 0.08 mmol, 0.4 equiv), 2-butanol (1 mL) were added into a 15 mL sealed glass vial under N<sub>2</sub> atmosphere. The reaction mixture was heated at 90 °C for 12 h. After being cooled to room temperature, the mixture was concentrated *in vacuo* and purified by silica gel (300 - 400 mesh) column chromatography to give the

desired products.

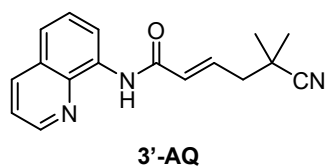

$R_f = 0.4$ , Petroleum Ether: Ethyl Acetate = 2: 1 (v/v)

Compound **3'-AQ** was prepared following the general procedure as a white solid. m.p. 136-138 °C.

$^1\text{H NMR}$  (400 MHz, Chloroform-*d*)  $\delta$  9.94 (s, 1H), 8.89 – 8.77 (m, 2H), 8.19 (dd,  $J = 8.3, 1.7$  Hz, 1H), 7.60 – 7.51 (m, 2H), 7.48 (dd,  $J = 8.3, 4.2$  Hz, 1H), 7.06 (dt,  $J = 15.3, 7.7$  Hz, 1H), 6.36 (dt,  $J = 15.1, 1.4$  Hz, 1H), 2.54 (dd,  $J = 7.7, 1.3$  Hz, 2H), 1.43 (s, 6H).

$^{13}\text{C NMR}$  (101 MHz, Chloroform-*d*)  $\delta$  163.20, 148.26, 138.49, 136.75, 134.44, 129.43, 128.12, 127.65, 124.37, 122.02, 121.82, 117.20, 43.25, 32.53, 26.50.

**HRMS** (ESI-TOF):  $m/z$  Calcd for  $\text{C}_{17}\text{H}_{17}\text{N}_3\text{NaO}^+$  [ $\text{M}+\text{Na}^+$ ]: 302.1264; found: 302.1267.

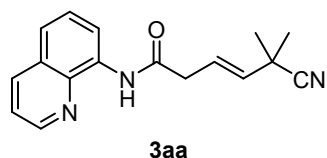

$R_f = 0.4$ , Petroleum Ether: Ethyl Acetate = 4: 1 (v/v)

Compound **3aa** was prepared following the general procedure in 75% yield (42 mg) as a white solid. m.p. 140-142 °C.

$^1\text{H NMR}$  (400 MHz, Chloroform-*d*)  $\delta$  10.00 (s, 1H), 8.78 – 8.64 (m, 2H), 8.12 (dd,  $J = 8.3, 1.7$  Hz, 1H), 7.53 – 7.45 (m, 2H), 7.42 (dd,  $J = 8.3, 4.2$  Hz, 1H), 6.15 (dt,  $J = 15.5, 7.2$  Hz, 1H), 5.73 (dt,  $J = 15.5, 1.3$  Hz, 1H), 3.32 (dd,  $J = 7.2, 1.3$  Hz, 2H), 1.54 (s, 6H).

$^{13}\text{C NMR}$  (101 MHz, Chloroform-*d*)  $\delta$  168.44, 148.20, 138.39, 136.85, 136.42, 134.15, 127.93, 127.35, 123.39, 123.33, 121.80, 121.71, 116.39, 41.19, 34.74, 27.37.

**HRMS** (ESI-TOF):  $m/z$  Calcd for  $\text{C}_{17}\text{H}_{18}\text{N}_3\text{O}^+$  [ $\text{M}+\text{H}^+$ ]: 280.1444; found: 280.1447.

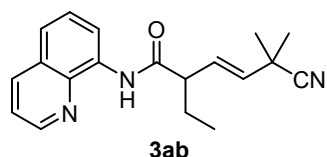

$R_f = 0.4$ , Petroleum Ether: Ethyl Acetate = 5: 1 (v/v)

Compound **3ab** was prepared following the general procedure in 78% yield (48 mg) as a white solid. m.p. 139-141 °C.

**$^1\text{H NMR}$**  (400 MHz, Chloroform-*d*)  $\delta$  9.92 (s, 1H), 8.69 – 8.62 (m, 2H), 8.03 (dt,  $J = 8.3, 1.5$  Hz, 1H), 7.44 – 7.35 (m, 2H), 7.33 (ddd,  $J = 8.3, 4.2, 1.2$  Hz, 1H), 5.94 (dd,  $J = 15.5, 8.8$  Hz, 1H), 5.61 (dd,  $J = 15.5, 0.9$  Hz, 1H), 3.05 – 2.95 (m, 1H), 2.03 – 1.89 (m, 1H), 1.63 (dt,  $J = 13.6, 7.5$  Hz, 1H), 1.41 (s, 6H), 0.90 (t,  $J = 7.4$  Hz, 3H).

**$^{13}\text{C NMR}$**  (101 MHz, Chloroform-*d*)  $\delta$  171.34, 148.23, 138.52, 136.42, 135.21, 134.32, 129.03, 127.97, 127.40, 123.43, 121.71, 116.41, 53.09, 34.72, 27.56, 27.38, 25.11, 11.85.

**HRMS** (ESI-TOF):  $m/z$  Calcd for  $\text{C}_{19}\text{H}_{21}\text{N}_3\text{NaO}^+$  [ $\text{M}+\text{Na}^+$ ]: 330.1577; found: 330.1557.

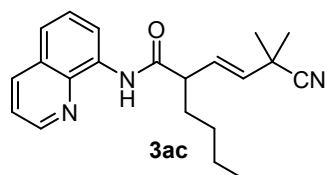

$R_f = 0.5$ , Petroleum Ether: Ethyl Acetate = 5: 1 (v/v)

Compound **3ac** was prepared following the general procedure in 68% yield (46 mg) as a white solid. m.p. 148-150 °C.

**$^1\text{H NMR}$**  (400 MHz, Chloroform-*d*)  $\delta$  10.02 (s, 1H), 8.81 – 8.71 (m, 2H), 8.15 (dd,  $J = 8.3, 1.7$  Hz, 1H), 7.55 – 7.47 (m, 2H), 7.44 (dd,  $J = 8.3, 4.2$  Hz, 1H), 6.05 (dd,  $J = 15.5, 8.8$  Hz, 1H), 5.71 (dd,  $J = 15.5, 0.9$  Hz, 1H), 3.23 – 3.12 (m, 1H), 2.09 – 1.97 (m, 1H), 1.74 – 1.64 (m, 1H), 1.54 (s, 3H), 1.51 (s, 3H), 1.36 (qd,  $J = 9.0, 7.7, 3.8$  Hz, 4H), 0.94 – 0.86 (m, 3H).

**$^{13}\text{C NMR}$**  (101 MHz, Chloroform-*d*)  $\delta$  171.50, 148.25, 138.56, 136.49, 134.95, 134.38, 129.40, 128.03, 127.47, 123.47, 121.73, 116.49, 51.61, 34.75, 31.71, 29.52, 27.60, 27.41, 22.64, 14.04.



**HRMS** (ESI-TOF):  $m/z$  Calcd for  $C_{21}H_{25}N_3NaO^+$   $[M+Na^+]$ : 358.1890; found: 358.1893.

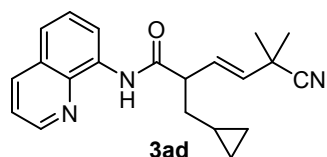

$R_f$  = 0.4, Petroleum Ether: Ethyl Acetate = 5: 1 (v/v)

Compound **3ad** was prepared following the general procedure in 72% yield (48 mg) as a white solid. m.p. 106-108 °C.

**$^1H$  NMR** (400 MHz, Chloroform-*d*)  $\delta$  9.95 (s, 1H), 8.66 (ddd,  $J$  = 9.0, 5.7, 1.9 Hz, 2H), 8.03 (dd,  $J$  = 8.3, 1.7 Hz, 1H), 7.44 – 7.36 (m, 2H), 7.33 (dd,  $J$  = 8.3, 4.2 Hz, 1H), 6.02 (dd,  $J$  = 15.5, 8.8 Hz, 1H), 5.64 (dd,  $J$  = 15.5, 0.8 Hz, 1H), 3.28 – 3.15 (m, 1H), 1.77 (dt,  $J$  = 13.9, 7.0 Hz, 1H), 1.58 (dt,  $J$  = 14.1, 7.2 Hz, 1H), 1.40 (s, 3H), 0.66 (ddt,  $J$  = 10.3, 7.6, 3.8 Hz, 1H), 0.43 – 0.29 (m, 2H), 0.10 – 0.04 (m, 2H).

**$^{13}C$  NMR** (101 MHz, Chloroform-*d*)  $\delta$  171.34, 148.23, 138.52, 136.41, 134.72, 134.34, 129.35, 127.97, 127.40, 123.44, 121.70, 116.39, 52.06, 37.21, 34.67, 27.49, 27.32, 9.04, 4.98, 4.59.

**HRMS** (ESI-TOF):  $m/z$  Calcd for  $C_{21}H_{23}N_3NaO^+$   $[M+Na^+]$ : 356.1733; found: 356.1734.

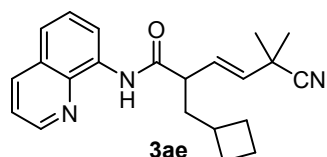

$R_f$  = 0.5, Petroleum Ether: Ethyl Acetate = 5: 1 (v/v)

Compound **3ae** was prepared following the general procedure in 65% yield (45 mg) as a white solid. m.p. 104-106 °C.

**$^1H$  NMR** (400 MHz, Chloroform-*d*)  $\delta$  9.99 (s, 1H), 8.80 – 8.71 (m, 2H), 8.14 (dd,  $J$  = 8.3, 1.7 Hz, 1H), 7.54 – 7.46 (m, 2H), 7.43 (dd,  $J$  = 8.3, 4.2 Hz, 1H), 6.03 (dd,  $J$  = 15.5, 8.8 Hz, 1H), 5.68 (dd,  $J$  = 15.5, 0.8 Hz, 1H), 3.13 (td,  $J$  = 8.3, 6.2 Hz, 1H), 2.38 (hept,  $J$  = 7.9 Hz, 1H), 2.18 – 2.07 (m, 2H), 2.06 – 2.00 (m, 1H), 1.86 – 1.76 (m, 3H), 1.68 (qd,  $J$  = 8.8, 1.8 Hz, 2H), 1.53 (s, 3H), 1.50 (s, 3H).

$^{13}\text{C}$  NMR (101 MHz, Chloroform-*d*)  $\delta$  171.36, 148.22, 138.51, 136.44, 134.59, 134.34, 129.41, 127.99, 127.42, 123.41, 121.70, 121.69, 116.43, 49.98, 39.14, 34.66, 34.08, 28.73, 28.26, 27.48, 27.31, 18.55.

HRMS (ESI-TOF):  $m/z$  Calcd for  $\text{C}_{22}\text{H}_{25}\text{N}_3\text{NaO}^+$   $[\text{M}+\text{Na}^+]$ : 370.1890; found: 370.1889.

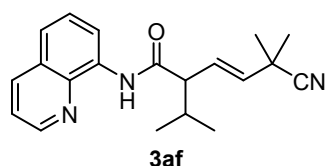

$R_f = 0.5$ , Petroleum Ether: Ethyl Acetate = 5: 1 (v/v)

Compound **3af** was prepared following the general procedure in 69% yield (44 mg) as a white solid. m.p. 101-103 °C.

$^1\text{H}$  NMR (400 MHz, Chloroform-*d*)  $\delta$  9.95 (s, 1H), 8.82 – 8.73 (m, 2H), 8.13 (dd,  $J = 8.2, 1.7$  Hz, 1H), 7.54 – 7.46 (m, 2H), 7.43 (dd,  $J = 8.3, 4.2$  Hz, 1H), 6.08 (dd,  $J = 15.5, 9.5$  Hz, 1H), 5.67 (d,  $J = 15.5$  Hz, 1H), 2.89 (dd,  $J = 9.5, 7.6$  Hz, 1H), 2.39 – 2.27 (m,  $J = 6.8$  Hz, 1H), 1.51 (s, 3H), 1.49 (s, 3H), 1.03 (d,  $J = 6.7$  Hz, 3H), 0.98 (d,  $J = 6.8$  Hz, 3H).

$^{13}\text{C}$  NMR (101 MHz, Chloroform-*d*)  $\delta$  171.31, 148.24, 138.47, 136.44, 135.67, 134.29, 127.98, 127.76, 127.40, 123.46, 121.71, 116.48, 59.06, 34.69, 30.45, 27.60, 27.35, 21.08, 19.58.

HRMS (ESI-TOF):  $m/z$  Calcd for  $\text{C}_{20}\text{H}_{24}\text{N}_3\text{O}^+$   $[\text{M}+\text{H}^+]$ : 322.1914; found: 322.1919.

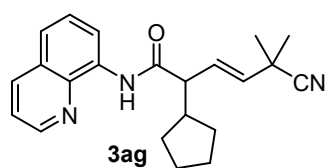

$R_f = 0.4$ , Petroleum Ether: Ethyl Acetate = 5: 1 (v/v)

Compound **3ag** was prepared following the general procedure in 61% yield (42 mg) as a yellow oil.

$^1\text{H}$  NMR (400 MHz, Chloroform-*d*)  $\delta$  9.93 (s, 1H), 8.79 (dd,  $J = 4.3, 1.7$  Hz, 1H), 8.76 (dd,  $J = 7.0, 2.0$  Hz, 1H), 8.15 (dd,  $J = 8.3, 1.7$  Hz, 1H), 7.55 – 7.47 (m, 2H), 7.44 (dd,  $J = 8.3, 4.2$  Hz, 1H), 6.08 (dd,  $J = 15.5, 9.1$  Hz, 1H), 5.67 (dd,  $J = 15.5, 0.7$  Hz, 1H), 2.98 (t,  $J = 9.1$  Hz, 1H), 2.42 (qt,  $J = 9.1, 7.4$  Hz, 1H), 1.92 – 1.85 (m, 1H),

1.84 – 1.76 (m, 1H), 1.64 (tdd,  $J = 7.5, 3.5, 1.9$  Hz, 2H), 1.61 – 1.53 (m, 2H), 1.49 (s, 3H), 1.48 (s, 3H), 1.38 – 1.29 (m, 1H), 1.25 (dddd,  $J = 13.7, 7.7, 3.4, 1.5$  Hz, 1H).

$^{13}\text{C}$  NMR (101 MHz, Chloroform- $d$ )  $\delta$  171.54, 148.26, 138.50, 136.50, 134.46, 134.39, 128.87, 128.03, 127.46, 123.51, 121.72, 121.70, 116.57, 57.51, 42.26, 34.64, 31.09, 30.43, 27.61, 27.37, 25.22, 25.04.

**HRMS** (ESI-TOF):  $m/z$  Calcd for  $\text{C}_{22}\text{H}_{25}\text{N}_3\text{NaO}^+$  [ $\text{M}+\text{Na}^+$ ]: 370.1890; found: 370.1896.

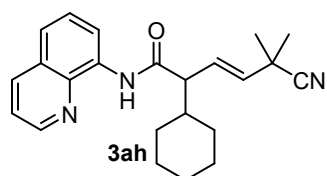

$R_f = 0.5$ , Petroleum Ether: Ethyl Acetate = 5: 1 (v/v)

Compound **3ah** was prepared following the general procedure in 54% yield (39 mg) as a yellow solid. m.p. 113-115 °C.

$^1\text{H}$  NMR (400 MHz, Chloroform- $d$ )  $\delta$  9.93 (s, 1H), 8.83 – 8.75 (m, 2H), 8.15 (dd,  $J = 8.3, 1.7$  Hz, 1H), 7.55 – 7.47 (m, 2H), 7.45 (dd,  $J = 8.3, 4.2$  Hz, 1H), 6.07 (dd,  $J = 15.5, 9.5$  Hz, 1H), 5.64 (dd,  $J = 15.5, 0.6$  Hz, 1H), 2.91 (dd,  $J = 9.5, 8.0$  Hz, 1H), 1.97 (tdt,  $J = 11.5, 7.9, 3.3$  Hz, 1H), 1.85 – 1.75 (m, 3H), 1.71 (dq,  $J = 16.0, 2.9$  Hz, 2H), 1.50 (s, 3H), 1.49 (s, 3H), 1.33 – 1.23 (m, 2H), 1.20 – 1.05 (m, 2H), 0.98 (qd,  $J = 12.3, 3.2$  Hz, 1H).

$^{13}\text{C}$  NMR (101 MHz, Chloroform- $d$ )  $\delta$  171.40, 148.27, 138.51, 136.52, 135.25, 134.33, 128.13, 128.05, 127.49, 123.57, 121.74, 116.57, 58.60, 40.01, 34.67, 31.62, 30.22, 27.68, 27.37, 26.35, 26.27.

**HRMS** (ESI-TOF):  $m/z$  Calcd for  $\text{C}_{23}\text{H}_{28}\text{N}_3\text{O}^+$  [ $\text{M}+\text{H}^+$ ]: 362.2227; found: 362.2229.

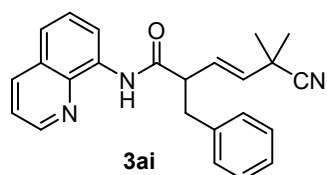

$R_f = 0.4$ , Petroleum Ether: Ethyl Acetate = 5: 1 (v/v)

Compound **3ai** was prepared following the general procedure in 68% yield (50 mg) as a white solid. m.p. 114-116 °C.

**<sup>1</sup>H NMR** (400 MHz, Chloroform-*d*)  $\delta$  9.98 (s, 1H), 8.74 (dd,  $J = 7.2, 1.8$  Hz, 1H), 8.72 (dd,  $J = 4.2, 1.7$  Hz, 1H), 8.10 (dd,  $J = 8.3, 1.7$  Hz, 1H), 7.54 – 7.44 (m, 2H), 7.39 (dd,  $J = 8.3, 4.2$  Hz, 1H), 7.26 – 7.18 (m, 4H), 7.17 – 7.12 (m, 1H), 6.08 – 5.99 (m, 1H), 5.47 (dd,  $J = 15.5, 0.7$  Hz, 1H), 3.47 – 3.36 (m, 2H), 2.95 (tt,  $J = 10.5, 3.5$  Hz, 1H), 1.42 (s, 3H), 1.34 (s, 3H).

**<sup>13</sup>C NMR** (101 MHz, Chloroform-*d*)  $\delta$  170.54, 148.22, 138.81, 138.47, 136.41, 135.77, 134.22, 129.39, 128.43, 128.31, 127.96, 127.39, 126.48, 123.25, 121.82, 121.71, 116.48, 53.43, 38.11, 34.65, 27.35, 27.25.

**HRMS** (ESI-TOF):  $m/z$  Calcd for  $C_{24}H_{23}N_3NaO^+$  [ $M+Na^+$ ]: 392.1733; found: 392.1731.

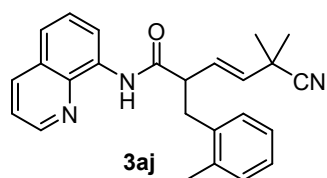

$R_f = 0.5$ , Petroleum Ether: Ethyl Acetate = 5: 1 (v/v)

Compound **3aj** was prepared following the general procedure in 61% yield (47 mg) as a white solid. m.p. 119-121 °C.

**<sup>1</sup>H NMR** (400 MHz, Chloroform-*d*)  $\delta$  10.03 (s, 1H), 8.78 (dd,  $J = 7.3, 1.8$  Hz, 1H), 8.75 (dd,  $J = 4.2, 1.7$  Hz, 1H), 8.13 (dd,  $J = 8.3, 1.7$  Hz, 1H), 7.56 – 7.48 (m, 2H), 7.43 (dd,  $J = 8.3, 4.2$  Hz, 1H), 7.17 – 7.12 (m, 2H), 7.12 – 7.04 (m, 2H), 6.15 – 6.05 (m, 1H), 5.45 (dd,  $J = 15.4, 0.7$  Hz, 1H), 3.51 – 3.40 (m, 2H), 3.04 – 2.91 (m, 1H), 2.39 (s, 3H), 1.45 (s, 3H), 1.36 (s, 3H).

**<sup>13</sup>C NMR** (101 MHz, Chloroform-*d*)  $\delta$  170.68, 148.22, 138.46, 137.06, 136.40, 136.24, 135.59, 134.22, 130.40, 130.13, 128.24, 127.95, 127.38, 126.60, 125.88, 123.21, 121.80, 121.71, 116.44, 52.30, 35.14, 34.64, 27.35, 27.18, 19.70.

**HRMS** (ESI-TOF):  $m/z$  Calcd for  $C_{25}H_{25}N_3NaO^+$  [ $M+Na^+$ ]: 406.1890; found: 406.1894.

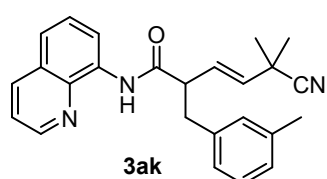

$R_f = 0.6$ , Petroleum Ether: Ethyl Acetate = 5: 1 (v/v)

Compound **3ak** was prepared following the general procedure in 54% yield (41 mg) as a white solid. m.p. 134-136 °C.

**$^1\text{H NMR}$**  (400 MHz, Chloroform-*d*)  $\delta$  10.00 (s, 1H), 8.78 (dd,  $J = 7.3, 1.7$  Hz, 1H), 8.75 (dd,  $J = 4.3, 1.7$  Hz, 1H), 8.13 (dd,  $J = 8.3, 1.7$  Hz, 1H), 7.56 – 7.47 (m, 2H), 7.42 (dd,  $J = 8.3, 4.2$  Hz, 1H), 7.16 (t,  $J = 7.5$  Hz, 1H), 7.06 – 6.95 (m, 3H), 6.07 (dd,  $J = 15.5, 8.7$  Hz, 1H), 5.51 (dd,  $J = 15.5, 0.7$  Hz, 1H), 3.50 – 3.34 (m, 2H), 2.94 (dd,  $J = 13.2, 8.2$  Hz, 1H), 2.29 (s, 3H), 1.46 (s, 3H), 1.39 (s, 3H).

**$^{13}\text{C NMR}$**  (101 MHz, Chloroform-*d*)  $\delta$  170.63, 148.20, 138.70, 138.49, 137.91, 136.37, 135.62, 134.25, 130.20, 128.45, 128.31, 127.95, 127.38, 127.19, 126.37, 123.28, 121.77, 121.69, 116.46, 53.44, 38.11, 34.64, 27.35, 27.29, 21.40.

**HRMS** (ESI-TOF):  $m/z$  Calcd for  $\text{C}_{25}\text{H}_{25}\text{N}_3\text{NaO}^+$  [ $\text{M}+\text{Na}^+$ ]: 406.1890; found: 406.1892.

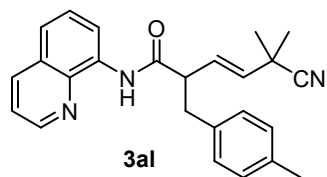

$R_f = 0.6$ , Petroleum Ether: Ethyl Acetate = 5: 1 (v/v)

Compound **3al** was prepared following the general procedure in 60% yield (46 mg) as a white solid. m.p. 126-128 °C.

**$^1\text{H NMR}$**  (400 MHz, Chloroform-*d*)  $\delta$  9.99 (s, 1H), 8.80 – 8.73 (m, 2H), 8.14 (dd,  $J = 8.2, 1.7$  Hz, 1H), 7.57 – 7.48 (m, 2H), 7.43 (dd,  $J = 8.3, 4.2$  Hz, 1H), 7.11 (d,  $J = 8.1$  Hz, 2H), 7.07 (d,  $J = 8.0$  Hz, 2H), 6.06 (dd,  $J = 15.5, 8.7$  Hz, 1H), 5.53 (dd,  $J = 15.6, 0.7$  Hz, 1H), 3.49 – 3.31 (m, 2H), 2.94 (dd,  $J = 13.4, 8.1$  Hz, 1H), 2.28 (s, 3H), 1.46 (s, 3H), 1.39 (s, 3H).

**$^{13}\text{C NMR}$**  (101 MHz, Chloroform-*d*)  $\delta$  170.70, 148.24, 138.54, 136.45, 135.98, 135.70, 135.59, 134.31, 129.29, 129.15, 128.53, 128.01, 127.46, 123.35, 121.81, 121.73, 116.54, 53.56, 37.80, 34.70, 27.40, 27.33, 21.10.

**HRMS** (ESI-TOF):  $m/z$  Calcd for  $\text{C}_{25}\text{H}_{26}\text{N}_3\text{O}^+$  [ $\text{M}+\text{H}^+$ ]: 384.2070; found: 384.2074.

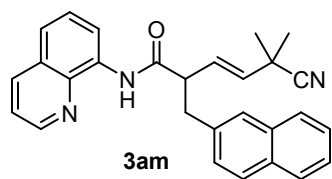

$R_f = 0.5$ , Petroleum Ether: Ethyl Acetate = 5: 1 (v/v)

Compound **3am** was prepared following the general procedure in 53% yield (44 mg) as a yellow solid. m.p. 151-153 °C.

**<sup>1</sup>H NMR** (400 MHz, Chloroform-*d*)  $\delta$  10.02 (s, 1H), 8.79 (dd,  $J = 7.5, 1.6$  Hz, 1H), 8.68 (dd,  $J = 4.3, 1.7$  Hz, 1H), 8.11 (dd,  $J = 8.3, 1.7$  Hz, 1H), 7.76 (ddd,  $J = 8.1, 5.0, 2.5$  Hz, 3H), 7.70 – 7.66 (m, 1H), 7.57 – 7.47 (m, 2H), 7.45 – 7.35 (m, 4H), 6.19 – 6.09 (m, 1H), 5.55 – 5.46 (m, 1H), 3.65 – 3.49 (m, 2H), 3.14 (tt,  $J = 12.2, 4.1$  Hz, 1H), 1.42 (s, 3H), 1.32 (s, 3H).

**<sup>13</sup>C NMR** (101 MHz, Chloroform-*d*)  $\delta$  170.53, 148.19, 138.46, 136.41, 136.39, 135.82, 134.21, 133.55, 132.28, 128.41, 128.06, 127.96, 127.78, 127.65, 127.58, 127.40, 126.06, 125.49, 123.27, 121.85, 121.70, 116.55, 53.45, 38.33, 34.68, 27.38, 27.24.

**HRMS** (ESI-TOF):  $m/z$  Calcd for  $C_{28}H_{25}N_3NaO^+$  [ $M+Na^+$ ]: 442.1890; found: 442.1891.

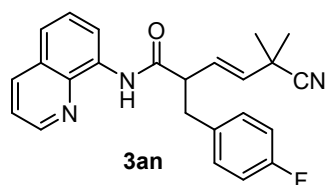

$R_f = 0.4$ , Petroleum Ether: Ethyl Acetate = 5: 1 (v/v)

Compound **3an** was prepared following the general procedure in 52% yield (40 mg) as a yellow solid. m.p. 129-131 °C.

**<sup>1</sup>H NMR** (400 MHz, Chloroform-*d*)  $\delta$  9.98 (s, 1H), 8.78 – 8.71 (m, 2H), 8.13 (dd,  $J = 8.3, 1.7$  Hz, 1H), 7.56 – 7.47 (m, 2H), 7.42 (dd,  $J = 8.3, 4.2$  Hz, 1H), 7.21 – 7.13 (m, 2H), 6.98 – 6.90 (m, 2H), 6.05 (dd,  $J = 15.5, 8.7$  Hz, 1H), 5.52 (d,  $J = 15.5$  Hz, 1H), 3.47 – 3.33 (m, 2H), 2.95 (dt,  $J = 13.0, 6.7$  Hz, 1H), 1.46 (s, 3H), 1.38 (s, 3H).

$^{13}\text{C}$  NMR (101 MHz, Chloroform-*d*)  $\delta$  170.30, 162.84, 160.41, 148.23, 138.44, 136.43, 135.95, 134.51, 134.48, 134.13, 130.86, 130.78, 128.20, 127.96, 127.36, 123.19, 121.89, 121.74, 116.48, 115.32, 115.10, 53.45, 37.27, 34.69, 27.33, 27.30.

$^{19}\text{F}$  NMR (376 MHz, Chloroform-*d*)  $\delta$  -116.64.

HRMS (ESI-TOF):  $m/z$  Calcd for  $\text{C}_{24}\text{H}_{23}\text{FN}_3\text{O}^+$  [ $\text{M}+\text{H}^+$ ]: 388.1820; found: 388.1823.

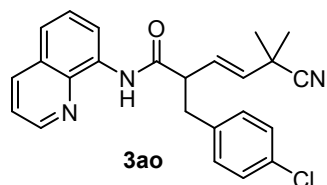

$R_f$  = 0.5, Petroleum Ether: Ethyl Acetate = 5: 1 (v/v)

Compound **3ao** was prepared following the general procedure in 68% yield (55 mg) as a yellow solid. m.p. 121-123 °C.

$^1\text{H}$  NMR (400 MHz, Chloroform-*d*)  $\delta$  9.98 (s, 1H), 8.79 – 8.69 (m, 2H), 8.15 (dd,  $J$  = 8.3, 1.7 Hz, 1H), 7.56 – 7.48 (m, 2H), 7.44 (dd,  $J$  = 8.3, 4.2 Hz, 1H), 7.25 – 7.20 (m, 2H), 7.18 – 7.12 (m, 2H), 6.05 (dd,  $J$  = 15.4, 8.7 Hz, 1H), 5.55 (dd,  $J$  = 15.6, 0.7 Hz, 1H), 3.47 – 3.32 (m, 2H), 2.94 (dd,  $J$  = 13.1, 7.6 Hz, 1H), 1.47 (s, 3H), 1.40 (s, 3H).

$^{13}\text{C}$  NMR (101 MHz, Chloroform-*d*)  $\delta$  170.20, 148.29, 138.51, 137.37, 136.51, 136.08, 134.16, 132.37, 130.78, 128.61, 128.21, 128.03, 127.44, 123.21, 121.97, 121.79, 116.59, 53.29, 37.48, 34.77, 27.41, 27.38.

HRMS (ESI-TOF):  $m/z$  Calcd for  $\text{C}_{24}\text{H}_{23}\text{ClN}_3\text{O}^+$  [ $\text{M}+\text{H}^+$ ]: 404.1524; found: 404.1521.

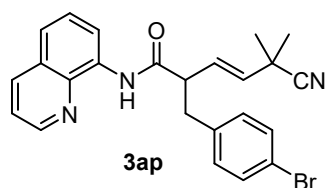

$R_f$  = 0.4, Petroleum Ether: Ethyl Acetate = 5: 1 (v/v)

Compound **3ap** was prepared following the general procedure in 58% yield (52 mg) as a yellow solid. m.p. 132-134 °C.

$^1\text{H}$  NMR (400 MHz, Chloroform-*d*)  $\delta$  9.98 (s, 1H), 8.79 – 8.70 (m, 2H), 8.15 (dd,  $J$  = 8.3, 1.7 Hz, 1H), 7.57 – 7.49 (m, 2H), 7.44 (dd,  $J$  = 8.3, 4.3 Hz, 1H), 7.40 – 7.34 (m,

2H), 7.13 – 7.07 (m, 2H), 6.05 (dd,  $J = 15.5, 8.8$  Hz, 1H), 5.55 (dd,  $J = 15.5, 0.8$  Hz, 1H), 3.47 – 3.29 (m, 2H), 2.93 (dd,  $J = 13.4, 7.9$  Hz, 1H), 1.47 (s, 3H), 1.40 (s, 3H).

$^{13}\text{C}$  NMR (101 MHz, Chloroform-*d*)  $\delta$  170.18, 148.29, 138.49, 137.90, 136.54, 136.10, 134.14, 131.57, 131.18, 128.19, 128.04, 127.45, 123.22, 121.98, 121.80, 120.44, 116.61, 53.23, 37.54, 34.78, 27.42, 27.39.

**HRMS** (ESI-TOF):  $m/z$  Calcd for  $\text{C}_{24}\text{H}_{23}\text{BrN}_3\text{O}^+$   $[\text{M}+\text{H}^+]$ : 448.1019; found: 448.1027.

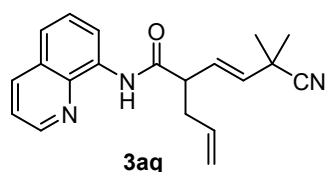

$R_f = 0.5$ , Petroleum Ether: Ethyl Acetate = 5: 1 (v/v)

Compound **3aq** was prepared following the general procedure in 80% yield (51 mg) as a white solid. m.p. 112-114 °C.

$^1\text{H}$  NMR (400 MHz, Chloroform-*d*)  $\delta$  10.06 (s, 1H), 8.77 (ddd,  $J = 9.0, 5.5, 2.0$  Hz, 2H), 8.16 (dd,  $J = 8.2, 1.7$  Hz, 1H), 7.56 – 7.49 (m, 2H), 7.45 (dd,  $J = 8.3, 4.3$  Hz, 1H), 6.06 (dd,  $J = 15.6, 8.8$  Hz, 1H), 5.82 (ddt,  $J = 17.1, 10.1, 7.0$  Hz, 1H), 5.74 (dd,  $J = 15.5, 0.9$  Hz, 1H), 5.20 – 5.04 (m, 2H), 3.30 (dddd,  $J = 8.7, 7.3, 6.2, 0.8$  Hz, 1H), 2.78 (dddt,  $J = 14.4, 7.4, 6.2, 1.3$  Hz, 1H), 2.55 – 2.45 (m, 1H), 1.55 (s, 3H), 1.52 (s, 3H).

$^{13}\text{C}$  NMR (101 MHz, Chloroform-*d*)  $\delta$  170.64, 148.27, 138.56, 136.55, 135.62, 135.03, 134.29, 128.66, 128.06, 127.50, 123.41, 121.86, 121.78, 117.66, 116.58, 51.08, 36.18, 34.81, 27.59, 27.44.

**HRMS** (ESI-TOF):  $m/z$  Calcd for  $\text{C}_{20}\text{H}_{21}\text{N}_3\text{NaO}^+$   $[\text{M}+\text{Na}^+]$ : 342.1577; found: 342.1579.

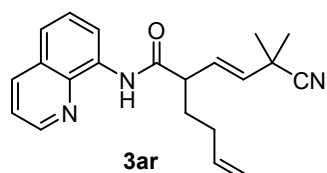

$R_f = 0.6$ , Petroleum Ether: Ethyl Acetate = 5: 1 (v/v)

Compound **3ar** was prepared following the general procedure in 72% yield (48 mg) as a white solid. m.p. 118-120 °C.



**<sup>1</sup>H NMR** (400 MHz, Chloroform-*d*)  $\delta$  10.03 (s, 1H), 8.81 – 8.69 (m, 2H), 8.14 (dd,  $J = 8.3, 1.7$  Hz, 1H), 7.55 – 7.46 (m, 2H), 7.43 (dd,  $J = 8.3, 4.2$  Hz, 1H), 6.04 (dd,  $J = 15.5, 8.9$  Hz, 1H), 5.87 – 5.75 (m, 1H), 5.73 (dd,  $J = 15.5, 0.8$  Hz, 1H), 5.11 – 4.96 (m, 2H), 3.23 (td,  $J = 8.5, 5.2$  Hz, 1H), 2.23 – 2.08 (m, 3H), 1.82 – 1.73 (m, 1H), 1.54 (s, 3H), 1.51 (s, 3H).

**<sup>13</sup>C NMR** (101 MHz, Chloroform-*d*)  $\delta$  171.14, 148.24, 138.54, 137.60, 136.44, 135.39, 134.31, 129.03, 128.00, 127.41, 123.36, 121.76, 121.73, 116.45, 115.71, 50.64, 34.74, 31.28, 30.79, 27.54, 27.36.

**HRMS** (ESI-TOF):  $m/z$  Calcd for  $C_{21}H_{23}N_3NaO^+$  [ $M+Na^+$ ]: 356.1733; found: 356.1728.

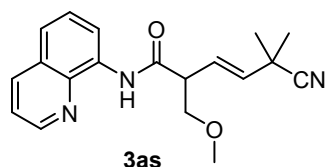

$R_f = 0.4$ , Petroleum Ether: Ethyl Acetate = 2: 1 (v/v)

Compound **3as** was prepared following the general procedure in 66% yield (43 mg) as a yellow oil.

**<sup>1</sup>H NMR** (400 MHz, Chloroform-*d*)  $\delta$  10.36 (s, 1H), 8.80 – 8.71 (m, 2H), 8.11 (dd,  $J = 8.3, 1.7$  Hz, 1H), 7.53 – 7.45 (m, 2H), 7.41 (dd,  $J = 8.3, 4.2$  Hz, 1H), 6.13 (dd,  $J = 15.6, 8.5$  Hz, 1H), 5.77 (dd,  $J = 15.7, 0.9$  Hz, 1H), 3.81 (dd,  $J = 9.2, 6.6$  Hz, 1H), 3.75 (dd,  $J = 9.3, 5.0$  Hz, 1H), 3.47 (dddd,  $J = 8.7, 6.3, 5.0, 1.0$  Hz, 1H), 3.42 (s, 3H), 1.52 (s, 3H), 1.50 (s, 3H).

**<sup>13</sup>C NMR** (101 MHz, Chloroform-*d*)  $\delta$  169.67, 148.23, 138.57, 136.34, 136.13, 134.40, 127.95, 127.32, 126.08, 123.32, 121.81, 121.66, 116.61, 72.88, 59.25, 51.45, 34.77, 27.45, 27.28.

**HRMS** (ESI-TOF):  $m/z$  Calcd for  $C_{19}H_{22}N_3O_2^+$  [ $M+H^+$ ]: 324.1707; found: 324.1701.

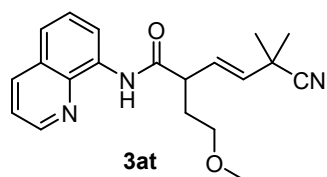

$R_f = 0.5$ , Petroleum Ether: Ethyl Acetate = 2: 1 (v/v)

Compound **3at** was prepared following the general procedure in 62% yield (42 mg) as a white solid. m.p. 112-114 °C.

**<sup>1</sup>H NMR** (400 MHz, Chloroform-*d*)  $\delta$  10.06 (s, 1H), 8.75 (ddd,  $J = 9.0, 5.5, 1.9$  Hz, 2H), 8.13 (dd,  $J = 8.3, 1.7$  Hz, 1H), 7.54 – 7.46 (m, 2H), 7.43 (dd,  $J = 8.2, 4.2$  Hz, 1H), 6.06 (dd,  $J = 15.5, 9.0$  Hz, 1H), 5.73 (dd,  $J = 15.5, 0.8$  Hz, 1H), 3.52 – 3.41 (m, 3H), 3.32 (s, 3H), 2.30 (dtd,  $J = 14.0, 6.9, 5.4$  Hz, 1H), 1.94 – 1.84 (m, 1H), 1.52 (s, 3H), 1.50 (s, 3H).

**<sup>13</sup>C NMR** (101 MHz, Chloroform-*d*)  $\delta$  171.15, 148.22, 138.51, 136.43, 135.19, 134.36, 128.86, 128.00, 127.40, 123.38, 121.75, 121.72, 116.48, 69.73, 58.72, 47.91, 34.66, 31.85, 27.53, 27.30.

**HRMS** (ESI-TOF):  $m/z$  Calcd for  $C_{20}H_{23}N_3NaO_2^+$  [ $M+Na^+$ ]: 360.1682; found: 360.1682.

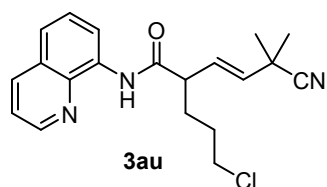

$R_f = 0.4$ , Petroleum Ether: Ethyl Acetate = 5: 1 (v/v)

Compound **3au** was prepared following the general procedure in 59% yield (42 mg) as a yellow solid. m.p. 95-97 °C.

**<sup>1</sup>H NMR** (400 MHz, Chloroform-*d*)  $\delta$  10.06 (s, 1H), 8.78 (dd,  $J = 4.2, 1.7$  Hz, 1H), 8.74 (dd,  $J = 6.4, 2.6$  Hz, 1H), 8.16 (dd,  $J = 8.3, 1.7$  Hz, 1H), 7.57 – 7.49 (m, 2H), 7.45 (dd,  $J = 8.3, 4.2$  Hz, 1H), 6.06 (dd,  $J = 15.5, 8.8$  Hz, 1H), 5.77 (dd,  $J = 15.5, 0.8$  Hz, 1H), 3.58 (tt,  $J = 7.4, 3.6$  Hz, 2H), 3.23 (dt,  $J = 8.8, 6.7$  Hz, 1H), 2.24 – 2.11 (m, 1H), 1.93 – 1.82 (m, 3H), 1.55 (s, 3H), 1.53 (s, 3H).

**<sup>13</sup>C NMR** (101 MHz, Chloroform-*d*)  $\delta$  170.69, 148.33, 138.56, 136.54, 135.72, 134.23, 128.79, 128.05, 127.47, 123.32, 121.93, 121.82, 116.56, 50.82, 44.73, 34.83, 30.41, 29.23, 27.57, 27.42.

**HRMS** (ESI-TOF):  $m/z$  Calcd for  $C_{20}H_{22}ClN_3NaO^+$  [ $M+Na^+$ ]: 378.1344; found: 378.1338.

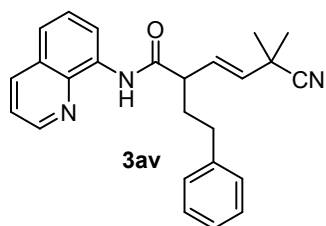

$R_f = 0.4$ , Petroleum Ether: Ethyl Acetate = 5: 1 (v/v)

Compound **3av** was prepared following the general procedure in 57% yield (44 mg) as a white solid. m.p. 100-102 °C.

**$^1\text{H NMR}$**  (400 MHz, Chloroform-*d*)  $\delta$  10.04 (s, 1H), 8.84 – 8.71 (m, 2H), 8.15 (dd,  $J = 8.2, 1.7$  Hz, 1H), 7.57 – 7.48 (m, 2H), 7.44 (dd,  $J = 8.3, 4.2$  Hz, 1H), 7.34 – 7.27 (m, 2H), 7.25 – 7.18 (m, 3H), 6.09 (dd,  $J = 15.5, 8.9$  Hz, 1H), 5.72 (dd,  $J = 15.5, 0.8$  Hz, 1H), 3.25 – 3.17 (m, 1H), 2.83 – 2.67 (m, 2H), 2.44 (ddt,  $J = 13.5, 8.9, 6.7$  Hz, 1H), 2.02 (dtd,  $J = 14.2, 8.4, 6.3$  Hz, 1H), 1.55 (s, 3H), 1.53 (s, 3H).

**$^{13}\text{C NMR}$**  (101 MHz, Chloroform-*d*)  $\delta$  170.98, 148.22, 141.15, 138.51, 136.42, 135.49, 134.26, 129.00, 128.60, 128.53, 127.97, 127.39, 126.12, 123.33, 121.78, 121.72, 116.45, 50.54, 34.73, 33.26, 33.12, 27.52, 27.30.

**HRMS** (ESI-TOF):  $m/z$  Calcd for  $\text{C}_{25}\text{H}_{25}\text{N}_3\text{NaO}^+$  [ $\text{M}+\text{Na}^+$ ]: 406.1890; found: 406.1899.

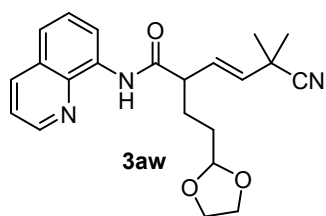

$R_f = 0.4$ , Petroleum Ether: Ethyl Acetate = 3: 1 (v/v)

Compound **3aw** was prepared following the general procedure in 72% yield (55 mg) as a yellow solid. m.p. 101-103 °C.

**$^1\text{H NMR}$**  (400 MHz, Chloroform-*d*)  $\delta$  10.06 (s, 1H), 8.76 (ddd,  $J = 8.9, 5.5, 2.0$  Hz, 2H), 8.15 (dd,  $J = 8.3, 1.7$  Hz, 1H), 7.55 – 7.48 (m, 2H), 7.44 (dd,  $J = 8.3, 4.2$  Hz, 1H), 6.05 (dd,  $J = 15.5, 8.8$  Hz, 1H), 5.74 (dd,  $J = 15.6, 0.8$  Hz, 1H), 4.92 (t,  $J = 4.4$  Hz, 1H), 4.02 – 3.92 (m, 2H), 3.89 – 3.81 (m, 2H), 3.29 (q,  $J = 8.5, 7.6$  Hz, 1H), 2.17 (dtt,  $J = 13.6, 6.8, 4.4$  Hz, 1H), 1.87 – 1.79 (m, 1H), 1.78 (dt,  $J = 6.7, 2.9$  Hz, 2H), 1.53 (s, 3H), 1.51 (s, 3H).

$^{13}\text{C}$  NMR (101 MHz, Chloroform-*d*)  $\delta$  171.14, 148.21, 138.53, 136.56, 135.27, 134.36, 129.13, 128.07, 127.51, 123.42, 121.80, 121.74, 116.64, 104.34, 65.06, 65.01, 51.08, 34.75, 31.42, 27.56, 27.43, 26.37.

HRMS (ESI-TOF):  $m/z$  Calcd for  $\text{C}_{22}\text{H}_{26}\text{N}_3\text{O}_3^+$   $[\text{M}+\text{H}^+]$ : 380.1969; found: 380.1965.

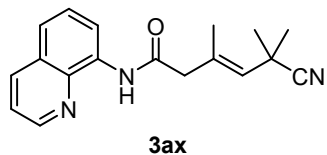

$R_f$  = 0.5, Petroleum Ether: Ethyl Acetate = 5: 1 (v/v)

Compound **3ax** was prepared following the general procedure in 68% yield (40 mg) as a white solid. m.p. 132-134 °C.

$^1\text{H}$  NMR (400 MHz, Chloroform-*d*)  $\delta$  10.04 (s, 1H), 8.79 (dd,  $J$  = 4.2, 1.7 Hz, 1H), 8.76 (dd,  $J$  = 6.8, 2.2 Hz, 1H), 8.15 (dd,  $J$  = 8.3, 1.7 Hz, 1H), 7.56 – 7.47 (m, 2H), 7.44 (dd,  $J$  = 8.3, 4.2 Hz, 1H), 5.43 – 5.34 (m, 1H), 3.71 (d,  $J$  = 0.8 Hz, 2H), 1.93 (d,  $J$  = 1.5 Hz, 3H), 1.58 (s, 6H).

$^{13}\text{C}$  NMR (101 MHz, Chloroform-*d*)  $\delta$  168.02, 148.35, 138.58, 136.42, 134.47, 134.10, 130.26, 128.04, 127.46, 124.69, 121.78, 121.74, 116.62, 41.28, 31.00, 29.41, 25.14.

HRMS (ESI-TOF):  $m/z$  Calcd for  $\text{C}_{18}\text{H}_{20}\text{N}_3\text{O}^+$   $[\text{M}+\text{H}^+]$ : 294.1601; found: 294.1607.

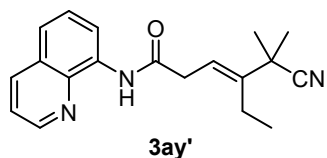

$R_f$  = 0.4, Petroleum Ether: Ethyl Acetate = 5: 1 (v/v)

Compound **3ay'** was prepared following the general procedure in 62% yield (38 mg) as a white solid. m.p. 130-132 °C.

$^1\text{H}$  NMR (400 MHz, Chloroform-*d*)  $\delta$  10.06 (s, 1H), 8.78 – 8.70 (m, 2H), 8.14 (dd,  $J$  = 8.3, 1.7 Hz, 1H), 7.55 – 7.47 (m, 2H), 7.43 (dd,  $J$  = 8.3, 4.2 Hz, 1H), 5.97 (t,  $J$  = 7.6 Hz, 1H), 3.37 (d,  $J$  = 7.6 Hz, 2H), 2.34 (q,  $J$  = 7.6 Hz, 2H), 1.63 (s, 6H), 1.18 (t,  $J$  = 7.6 Hz, 3H).

$^{13}\text{C}$  NMR (101 MHz, Chloroform-*d*)  $\delta$  168.86, 148.24, 145.87, 138.48, 136.46, 134.23, 127.99, 127.43, 124.20, 121.79, 121.75, 118.63, 116.45, 38.94, 37.27, 27.06, 21.93, 14.79.

HRMS (ESI-TOF):  $m/z$  Calcd for  $\text{C}_{19}\text{H}_{21}\text{N}_3\text{NaO}^+$   $[\text{M}+\text{Na}^+]$ : 330.1577; found: 330.1571.

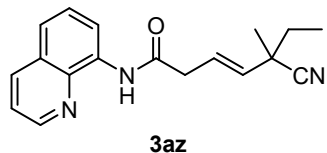

$R_f$  = 0.3, Petroleum Ether: Ethyl Acetate = 4: 1 (v/v)

Compound **3az** was prepared following the general procedure in 73% yield (43 mg) as a white solid. m.p. 104-106 °C.

$^1\text{H}$  NMR (400 MHz, Chloroform-*d*)  $\delta$  10.00 (s, 1H), 8.77 – 8.70 (m, 2H), 8.12 (dd,  $J$  = 8.3, 1.7 Hz, 1H), 7.54 – 7.46 (m, 2H), 7.42 (dd,  $J$  = 8.3, 4.2 Hz, 1H), 6.17 (dt,  $J$  = 15.5, 7.2 Hz, 1H), 5.60 (dt,  $J$  = 15.5, 1.4 Hz, 1H), 3.34 (dd,  $J$  = 7.2, 1.4 Hz, 2H), 1.80 – 1.67 (m, 2H), 1.51 (s, 3H), 1.10 (t,  $J$  = 7.5 Hz, 3H).

$^{13}\text{C}$  NMR (101 MHz, Chloroform-*d*)  $\delta$  168.52, 148.20, 138.46, 136.39, 135.93, 134.23, 127.95, 127.37, 124.30, 122.34, 121.79, 121.72, 116.42, 41.39, 40.55, 33.42, 25.59, 9.70.

HRMS (ESI-TOF):  $m/z$  Calcd for  $\text{C}_{18}\text{H}_{20}\text{N}_3\text{O}^+$   $[\text{M}+\text{H}^+]$ : 294.1601; found: 294.1609.

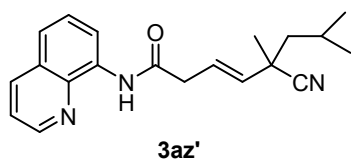

$R_f$  = 0.4, Petroleum Ether: Ethyl Acetate = 5: 1 (v/v)

Compound **3az'** was prepared following the general procedure in 63% yield (40 mg) as a white solid. m.p. 88-90 °C.

$^1\text{H}$  NMR (400 MHz, Chloroform-*d*)  $\delta$  9.98 (s, 1H), 8.78 – 8.70 (m, 2H), 8.13 (dd,  $J$  = 8.3, 1.7 Hz, 1H), 7.54 – 7.46 (m, 2H), 7.42 (dd,  $J$  = 8.3, 4.3 Hz, 1H), 6.20 (dt,  $J$  = 15.5, 7.2 Hz, 1H), 5.62 (dt,  $J$  = 15.5, 1.3 Hz, 1H), 3.34 (dd,  $J$  = 7.2, 1.4 Hz, 2H), 1.87 (dt,  $J$  = 13.1, 6.7 Hz, 1H), 1.67 – 1.54 (m, 2H), 1.52 (s, 3H), 1.01 (d,  $J$  = 6.7 Hz, 3H), 0.96 (d,  $J$  = 6.6 Hz, 3H).

$^{13}\text{C}$  NMR (101 MHz, Chloroform-*d*)  $\delta$  168.55, 148.18, 138.42, 136.52, 136.44, 134.23, 127.97, 127.39, 123.54, 122.96, 121.80, 121.71, 116.49, 48.72, 41.36, 38.99, 27.26, 25.72, 23.94, 23.65.

HRMS (ESI-TOF):  $m/z$  Calcd for  $\text{C}_{20}\text{H}_{23}\text{N}_3\text{NaO}^+$   $[\text{M}+\text{Na}^+]$ : 344.1733; found: 344.1735.

## 6. General Procedures for the Synthesis of $\beta$ -Lactams

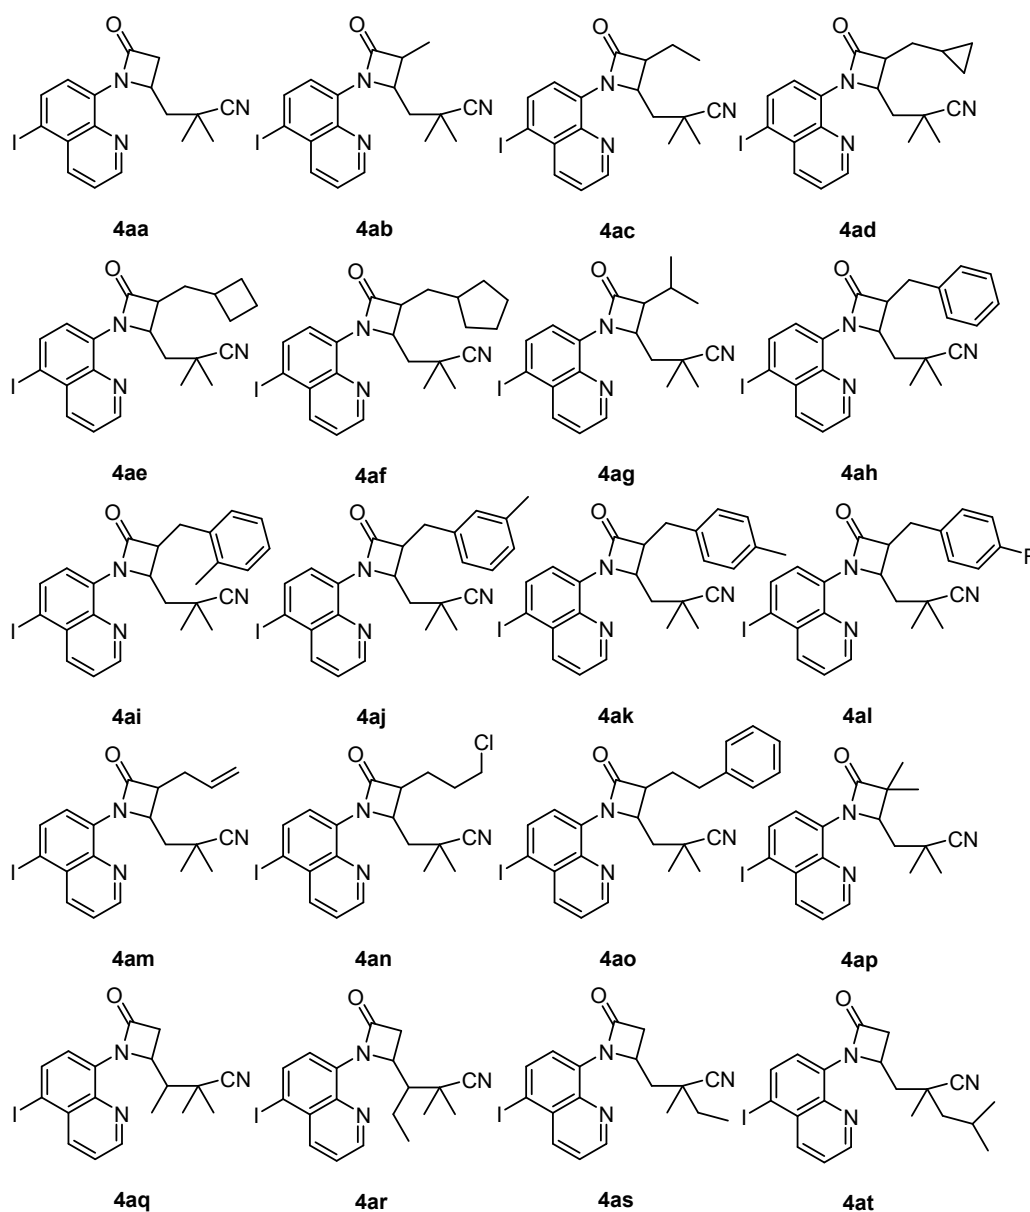

Scheme S13. Products of the Synthesis of  $\beta$ -Lactams

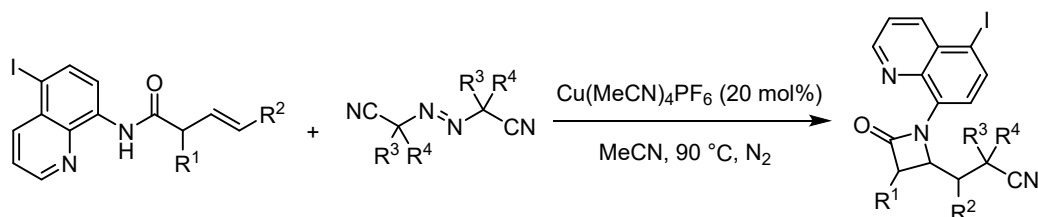

**Scheme S14. Synthesis of products of the Synthesis of  $\beta$ -Lactams**

The alkenes substrate (0.2 mmol, 1 equiv), azo compounds (0.8 mmol, 4 equiv),  $\text{Cu}(\text{MeCN})_4\text{PF}_6$  (15mg, 0.04 mmol, 0.2 equiv), MeCN (2 mL) were added into a 15 mL sealed glass vial under  $\text{N}_2$  atmosphere. The reaction mixture was heated at 90 °C for 12 h. After being cooled to room temperature, the mixture was concentrated *in vacuo* and purified by silica gel (300 - 400 mesh) column chromatography to give the desired products.

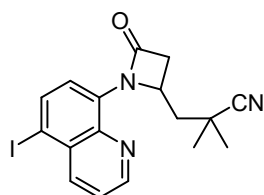

**4aa**

$R_f = 0.4$ , Petroleum Ether: Ethyl Acetate = 4: 1 (v/v)

Compound **4aa** was prepared following the general procedure in 89% yield (72 mg) as a yellow solid. m.p. 132-134 °C.

$^1\text{H NMR}$  (400 MHz, Chloroform-*d*)  $\delta$  8.85 (dt,  $J = 3.6, 1.7$  Hz, 1H), 8.35 (ddd,  $J = 8.6, 2.9, 1.5$  Hz, 1H), 8.11 (dd,  $J = 8.2, 1.5$  Hz, 1H), 8.04 (dd,  $J = 8.3, 2.3$  Hz, 1H), 7.49 (ddd,  $J = 8.6, 4.1, 1.7$  Hz, 1H), 5.46 (ddt,  $J = 12.9, 4.6, 2.2$  Hz, 1H), 3.52 (dd,  $J = 15.3, 5.2$  Hz, 1H), 3.02 (ddd,  $J = 15.4, 2.6, 1.0$  Hz, 1H), 2.39 (dt,  $J = 13.6, 1.5$  Hz, 1H), 1.71 – 1.65 (m, 1H), 1.45 (d,  $J = 1.0$  Hz, 3H), 1.38 (d,  $J = 1.0$  Hz, 3H).

$^{13}\text{C NMR}$  (101 MHz, Chloroform-*d*)  $\delta$  165.77, 149.79, 140.64, 140.56, 137.86, 134.03, 130.59, 124.28, 123.23, 122.14, 92.04, 54.20, 45.58, 44.16, 30.82, 27.33, 27.14.

**HRMS** (ESI-TOF):  $m/z$  Calcd for  $\text{C}_{17}\text{H}_{16}\text{IN}_3\text{NaO}^+$   $[\text{M}+\text{Na}^+]$ : 428.0230; found: 428.0237.

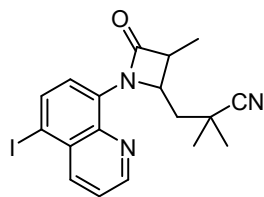

**4ab**

$R_f = 0.5$ , Petroleum Ether: Ethyl Acetate = 4: 1 (v/v)

Compound **4ab** was prepared following the general procedure in 81% yield (68 mg) as a yellow oil.

$^1\text{H NMR}$  (400 MHz, Chloroform-*d*)  $\delta$  8.84 (dd,  $J = 4.1, 1.7$  Hz, 1H), 8.36 (dd,  $J = 8.6, 1.6$  Hz, 1H), 8.12 (d,  $J = 8.2$  Hz, 1H), 8.05 (d,  $J = 8.2$  Hz, 1H), 7.49 (dd,  $J = 8.6, 4.1$  Hz, 1H), 5.07 (dt,  $J = 10.8, 2.0$  Hz, 1H), 3.18 (qd,  $J = 7.3, 2.2$  Hz, 1H), 2.33 (dd,  $J = 13.6, 1.7$  Hz, 1H), 1.74 (dd,  $J = 13.6, 10.7$  Hz, 1H), 1.58 (d,  $J = 7.3$  Hz, 3H), 1.48 (s, 3H), 1.39 (s, 3H).

$^{13}\text{C NMR}$  (101 MHz, Chloroform-*d*)  $\delta$  169.59, 149.73, 140.72, 140.64, 137.89, 134.00, 130.64, 124.39, 123.19, 122.51, 91.94, 62.41, 53.15, 44.23, 30.57, 27.58, 27.18, 13.97.

**HRMS** (ESI-TOF):  $m/z$  Calcd for  $\text{C}_{18}\text{H}_{18}\text{IN}_3\text{NaO}^+$   $[\text{M}+\text{Na}^+]$ : 442.0387; found: 442.0381.

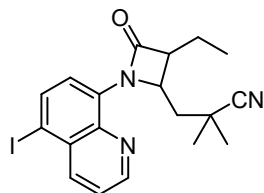

**4ac**

$R_f = 0.6$ , Petroleum Ether: Ethyl Acetate = 4: 1 (v/v)

Compound **4ac** was prepared following the general procedure in 78% yield (68 mg) as a yellow oil.

$^1\text{H NMR}$  (400 MHz, Chloroform-*d*)  $\delta$  8.84 (dd,  $J = 4.1, 1.6$  Hz, 1H), 8.36 (dd,  $J = 8.6, 1.6$  Hz, 1H), 8.14 (d,  $J = 8.2$  Hz, 1H), 8.05 (d,  $J = 8.2$  Hz, 1H), 7.49 (dd,  $J = 8.6, 4.1$  Hz, 1H), 5.15 (dt,  $J = 10.6, 2.0$  Hz, 1H), 3.18 (ddd,  $J = 7.7, 5.4, 2.2$  Hz, 1H), 2.31 (dd,  $J = 13.6, 1.9$  Hz, 1H), 2.11 – 1.95 (m, 2H), 1.75 (dd,  $J = 13.6, 10.7$  Hz, 1H), 1.46 (s, 3H), 1.38 (s, 3H), 1.19 (t,  $J = 7.5$  Hz, 3H).



$^{13}\text{C}$  NMR (101 MHz, Chloroform-*d*)  $\delta$  169.17, 149.72, 140.78, 140.64, 137.92, 134.01, 130.64, 124.40, 123.17, 122.43, 91.89, 59.61, 59.27, 44.17, 30.56, 27.74, 27.14, 22.36, 11.24.

HRMS (ESI-TOF):  $m/z$  Calcd for  $\text{C}_{19}\text{H}_{21}\text{IN}_3\text{O}^+$  [ $\text{M}+\text{H}^+$ ]: 434.0724; found: 434.0725.

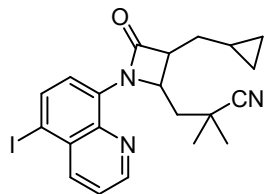

**4ad**

$R_f$  = 0.4, Petroleum Ether: Ethyl Acetate = 8: 1 (v/v)

Compound **4ad** was prepared following the general procedure in 84% yield (77 mg) as a yellow oil.

$^1\text{H}$  NMR (400 MHz, Chloroform-*d*)  $\delta$  8.83 (dd,  $J$  = 4.1, 1.6 Hz, 1H), 8.35 (dd,  $J$  = 8.6, 1.7 Hz, 1H), 8.15 (d,  $J$  = 8.2 Hz, 1H), 8.05 (d,  $J$  = 8.2 Hz, 1H), 7.48 (dd,  $J$  = 8.6, 4.1 Hz, 1H), 5.30 (dt,  $J$  = 10.7, 2.0 Hz, 1H), 3.30 (ddd,  $J$  = 7.6, 5.5, 2.2 Hz, 1H), 2.32 (dd,  $J$  = 13.6, 1.9 Hz, 1H), 2.00 (ddd,  $J$  = 14.2, 7.6, 6.4 Hz, 1H), 1.85 – 1.78 (m, 1H), 1.77 – 1.69 (m, 1H), 1.46 (s, 3H), 1.39 (s, 3H), 1.03 (qdt,  $J$  = 7.9, 6.5, 4.9 Hz, 1H), 0.61 – 0.45 (m, 2H), 0.20 (dq,  $J$  = 4.8, 1.7 Hz, 2H).

$^{13}\text{C}$  NMR (101 MHz, Chloroform-*d*)  $\delta$  169.20, 149.67, 140.74, 140.59, 137.89, 134.03, 130.60, 124.38, 123.15, 122.37, 91.84, 59.63, 58.31, 44.28, 34.13, 30.55, 27.68, 27.16, 8.51, 5.29, 4.74.

HRMS (ESI-TOF):  $m/z$  Calcd for  $\text{C}_{21}\text{H}_{23}\text{IN}_3\text{O}^+$  [ $\text{M}+\text{H}^+$ ]: 460.0880; found: 460.0883.

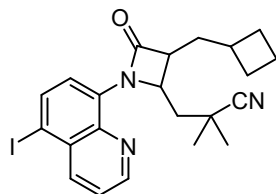

**4ae**

$R_f$  = 0.4, Petroleum Ether: Ethyl Acetate = 8: 1 (v/v)

Compound **4ae** was prepared following the general procedure in 85% yield (80 mg) as a yellow oil.

$^1\text{H}$  NMR (400 MHz, Chloroform-*d*)  $\delta$  8.84 (dd,  $J$  = 4.1, 1.7 Hz, 1H), 8.36 (dd,  $J$  = 8.6, 1.6 Hz, 1H), 8.13 (d,  $J$  = 8.3 Hz, 1H), 8.05 (d,  $J$  = 8.3 Hz, 1H), 7.49 (dd,  $J$  = 8.6, 4.1

Hz, 1H), 5.14 (dt,  $J = 10.6, 2.0$  Hz, 1H), 3.13 (ddd,  $J = 7.9, 5.5, 2.2$  Hz, 1H), 2.70 (p,  $J = 7.8$  Hz, 1H), 2.29 (dd,  $J = 13.6, 1.9$  Hz, 1H), 2.21 – 2.04 (m, 4H), 1.92 – 1.79 (m, 2H), 1.78 – 1.68 (m, 3H), 1.46 (s, 3H), 1.38 (s, 3H).

$^{13}\text{C}$  NMR (101 MHz, Chloroform-*d*)  $\delta$  169.25, 149.70, 140.74, 140.69, 137.95, 134.02, 130.65, 123.18, 122.42, 91.87, 59.90, 56.66, 44.36, 36.42, 33.64, 30.59, 29.26, 28.48, 27.66, 27.22, 18.61.

**HRMS** (ESI-TOF):  $m/z$  Calcd for  $\text{C}_{22}\text{H}_{25}\text{IN}_3\text{O}^+$  [ $\text{M}+\text{H}^+$ ]: 474.1037; found: 474.1037.

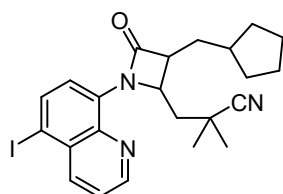

**4af**

$R_f = 0.4$ , Petroleum Ether: Ethyl Acetate = 8: 1 (v/v)

Compound **4af** was prepared following the general procedure in 85% yield (83 mg) as a yellow oil.

$^1\text{H}$  NMR (400 MHz, Chloroform-*d*)  $\delta$  8.83 (dd,  $J = 4.1, 1.7$  Hz, 1H), 8.36 (dd,  $J = 8.6, 1.7$  Hz, 1H), 8.15 (d,  $J = 8.2$  Hz, 1H), 8.06 (d,  $J = 8.2$  Hz, 1H), 7.48 (dd,  $J = 8.6, 4.1$  Hz, 1H), 5.12 (dt,  $J = 10.6, 2.0$  Hz, 1H), 3.22 (ddd,  $J = 10.1, 4.8, 2.1$  Hz, 1H), 2.35 – 2.19 (m, 2H), 2.10 (ddd,  $J = 13.4, 10.2, 5.4$  Hz, 1H), 2.01 – 1.84 (m, 3H), 1.74 (dd,  $J = 13.7, 10.6$  Hz, 1H), 1.68 – 1.51 (m, 5H), 1.46 (s, 3H), 1.39 (s, 3H), 1.21 (q,  $J = 11.3, 9.4$  Hz, 2H).

$^{13}\text{C}$  NMR (101 MHz, Chloroform-*d*)  $\delta$  169.45, 149.69, 140.77, 140.62, 137.93, 134.12, 130.62, 124.43, 123.16, 122.39, 91.82, 60.72, 57.58, 44.32, 37.92, 36.21, 33.65, 32.48, 30.57, 27.70, 27.20, 25.27, 25.23.

**HRMS** (ESI-TOF):  $m/z$  Calcd for  $\text{C}_{23}\text{H}_{26}\text{IN}_3\text{NaO}^+$  [ $\text{M}+\text{Na}^+$ ]: 510.1013; found: 510.1011.

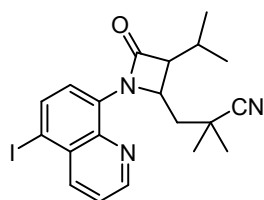

**4ag**

$R_f = 0.3$ , Petroleum Ether: Ethyl Acetate = 8: 1 (v/v)

Compound **4ag** was prepared following the general procedure in 60% yield (54 mg) as a yellow oil.

**<sup>1</sup>H NMR** (400 MHz, Chloroform-*d*)  $\delta$  8.84 (dd,  $J = 4.1, 1.7$  Hz, 1H), 8.36 (dd,  $J = 8.6, 1.6$  Hz, 1H), 8.15 (d,  $J = 8.2$  Hz, 1H), 8.05 (d,  $J = 8.2$  Hz, 1H), 7.49 (dd,  $J = 8.6, 4.1$  Hz, 1H), 5.20 (dt,  $J = 10.4, 2.1$  Hz, 1H), 3.16 (dd,  $J = 5.3, 2.1$  Hz, 1H), 2.35 – 2.22 (m, 2H), 1.76 (dd,  $J = 13.7, 10.5$  Hz, 1H), 1.45 (s, 3H), 1.37 (s, 3H), 1.23 (d,  $J = 6.9$  Hz, 3H), 1.18 (d,  $J = 6.7$  Hz, 3H).

**<sup>13</sup>C NMR** (101 MHz, Chloroform-*d*)  $\delta$  168.46, 149.71, 140.87, 140.64, 137.93, 133.93, 130.63, 124.42, 123.16, 122.44, 91.92, 64.16, 58.27, 44.17, 30.48, 28.39, 28.01, 27.03, 21.67, 18.70.

**HRMS** (ESI-TOF):  $m/z$  Calcd for  $C_{20}H_{22}IN_3NaO^+$  [ $M+Na^+$ ]: 470.0700; found: 470.0708.

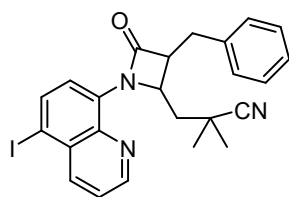

**4ah**

$R_f = 0.6$ , Petroleum Ether: Ethyl Acetate = 4: 1 (v/v)

Compound **4ah** was prepared following the general procedure in 66% yield (65 mg) as a yellow solid. m.p. 140-142 °C.

**<sup>1</sup>H NMR** (400 MHz, Chloroform-*d*)  $\delta$  8.80 (dd,  $J = 4.1, 1.7$  Hz, 1H), 8.34 (dd,  $J = 8.6, 1.7$  Hz, 1H), 8.11 (d,  $J = 8.2$  Hz, 1H), 8.04 (d,  $J = 8.2$  Hz, 1H), 7.47 (dd,  $J = 8.6, 4.1$  Hz, 1H), 7.42 – 7.35 (m, 2H), 7.34 – 7.27 (m, 2H), 7.24 – 7.16 (m, 1H), 5.20 (dt,  $J = 10.6, 2.0$  Hz, 1H), 3.43 (ddd,  $J = 7.2, 6.2, 2.1$  Hz, 1H), 3.31 (d,  $J = 6.7$  Hz, 2H), 2.27 (dd,  $J = 13.7, 1.9$  Hz, 1H), 1.72 (dd,  $J = 13.7, 10.6$  Hz, 1H), 1.34 (s, 3H), 1.16 (s, 3H).

**<sup>13</sup>C NMR** (101 MHz, Chloroform-*d*)  $\delta$  168.42, 149.71, 140.71, 140.57, 138.07, 137.85, 133.83, 130.60, 129.56, 128.77, 126.86, 124.41, 123.17, 122.48, 92.13, 59.70, 59.33, 44.11, 35.42, 30.55, 27.25, 27.11.

**HRMS** (ESI-TOF):  $m/z$  Calcd for  $C_{24}H_{22}IN_3NaO^+$  [ $M+Na^+$ ]: 518.0700; found: 518.0702.

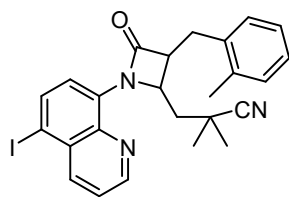

**4ai**

$R_f = 0.4$ , Petroleum Ether: Ethyl Acetate = 8: 1 (v/v)

Compound **4ai** was prepared following the general procedure in 71% yield (72 mg) as a yellow oil.

**$^1\text{H NMR}$**  (400 MHz, Chloroform-*d*)  $\delta$  8.88 (dd,  $J = 4.1, 1.7$  Hz, 1H), 8.37 (dd,  $J = 8.6, 1.7$  Hz, 1H), 8.15 (d,  $J = 8.2$  Hz, 1H), 8.06 (d,  $J = 8.2$  Hz, 1H), 7.50 (dd,  $J = 8.6, 4.1$  Hz, 1H), 7.39 (dd,  $J = 7.0, 1.6$  Hz, 1H), 7.22 – 7.10 (m, 3H), 5.33 – 5.26 (m, 1H), 3.45 – 3.33 (m, 2H), 3.26 (tt,  $J = 11.1, 5.7$  Hz, 1H), 2.42 (s, 3H), 2.30 (dd,  $J = 13.8, 1.8$  Hz, 1H), 1.67 (dd,  $J = 13.8, 10.5$  Hz, 1H), 1.25 (s, 3H), 1.04 (s, 3H).

**$^{13}\text{C NMR}$**  (101 MHz, Chloroform-*d*)  $\delta$  168.46, 149.89, 140.74, 140.61, 137.87, 136.43, 136.41, 133.91, 130.66, 130.64, 130.42, 127.13, 126.40, 124.28, 123.24, 122.50, 92.18, 60.57, 58.16, 44.13, 33.23, 30.58, 27.42, 26.43, 19.77.

**HRMS** (ESI-TOF):  $m/z$  Calcd for  $\text{C}_{25}\text{H}_{24}\text{IN}_3\text{NaO}^+$  [ $\text{M}+\text{Na}^+$ ]: 532.0856; found: 532.0855.

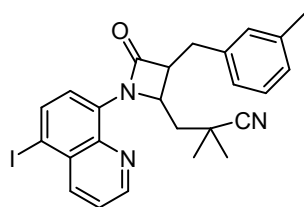

**4aj**

$R_f = 0.4$ , Petroleum Ether: Ethyl Acetate = 8: 1 (v/v)

Compound **4aj** was prepared following the general procedure in 55% yield (56 mg) as a yellow oil.

**$^1\text{H NMR}$**  (400 MHz, Chloroform-*d*)  $\delta$  8.83 (dd,  $J = 4.1, 1.7$  Hz, 1H), 8.36 (dd,  $J = 8.6, 1.6$  Hz, 1H), 8.10 (d,  $J = 8.2$  Hz, 1H), 8.05 (d,  $J = 8.2$  Hz, 1H), 7.48 (dd,  $J = 8.6, 4.1$  Hz, 1H), 7.23 – 7.15 (m, 3H), 7.02 (dt,  $J = 7.1, 2.0$  Hz, 1H), 5.20 (dt,  $J = 10.6, 2.0$  Hz, 1H), 3.41 (td,  $J = 6.9, 2.1$  Hz, 1H), 3.32 – 3.21 (m, 2H), 2.32 (s, 3H), 2.28 (dd,  $J = 13.7, 1.9$  Hz, 1H), 1.71 (dd,  $J = 13.7, 10.6$  Hz, 1H), 1.32 (s, 3H), 1.13 (s, 3H).

$^{13}\text{C}$  NMR (101 MHz, Chloroform-*d*)  $\delta$  168.49, 149.68, 140.68, 140.62, 138.38, 137.99, 137.88, 133.80, 130.61, 130.32, 128.66, 127.59, 126.50, 124.39, 123.17, 122.52, 92.14, 59.86, 59.36, 44.07, 35.43, 30.57, 27.34, 26.90, 21.50.

HRMS (ESI-TOF):  $m/z$  Calcd for  $\text{C}_{25}\text{H}_{24}\text{IN}_3\text{NaO}^+$   $[\text{M}+\text{Na}^+]$ : 532.0856; found: 532.0866.

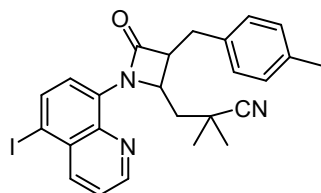

**4ak**

$R_f$  = 0.6, Petroleum Ether: Ethyl Acetate = 4: 1 (v/v)

Compound **4ak** was prepared following the general procedure in 72% yield (73 mg) as a white solid. m.p. 144-146 °C.

$^1\text{H}$  NMR (400 MHz, Chloroform-*d*)  $\delta$  8.81 (dd,  $J$  = 4.1, 1.7 Hz, 1H), 8.34 (dd,  $J$  = 8.6, 1.6 Hz, 1H), 8.11 (d,  $J$  = 8.2 Hz, 1H), 8.04 (d,  $J$  = 8.2 Hz, 1H), 7.47 (dd,  $J$  = 8.6, 4.1 Hz, 1H), 7.26 (d,  $J$  = 8.0 Hz, 2H), 7.11 (d,  $J$  = 7.8 Hz, 2H), 5.19 (dt,  $J$  = 10.6, 2.0 Hz, 1H), 3.40 (ddd,  $J$  = 8.1, 6.2, 2.1 Hz, 1H), 3.27 (d,  $J$  = 6.3 Hz, 2H), 2.32 – 2.24 (m, 4H), 1.71 (dd,  $J$  = 13.7, 10.6 Hz, 1H), 1.35 (s, 3H), 1.17 (s, 3H).

$^{13}\text{C}$  NMR (101 MHz, Chloroform-*d*)  $\delta$  168.52, 149.71, 140.72, 140.57, 137.87, 136.33, 134.95, 133.92, 130.61, 129.44, 129.41, 124.44, 123.16, 122.46, 92.05, 59.78, 59.49, 44.14, 35.03, 30.58, 27.31, 27.10, 21.19.

HRMS (ESI-TOF):  $m/z$  Calcd for  $\text{C}_{25}\text{H}_{25}\text{IN}_3\text{O}^+$   $[\text{M}+\text{H}^+]$ : 510.1037; found: 510.1033.

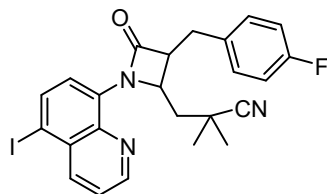

**4al**

$R_f$  = 0.6, Petroleum Ether: Ethyl Acetate = 4: 1 (v/v)

Compound **4al** was prepared following the general procedure in 57% yield (58 mg) as a yellow solid. m.p. 158-160 °C.

$^1\text{H}$  NMR (400 MHz, Chloroform-*d*)  $\delta$  8.78 (dd,  $J$  = 4.5, 1.6 Hz, 1H), 8.35 (dt,  $J$  = 8.7, 1.4 Hz, 1H), 8.08 (d,  $J$  = 8.2 Hz, 1H), 8.06 – 8.02 (m, 1H), 7.47 (dd,  $J$  = 8.6, 4.1 Hz,

1H), 7.38 – 7.31 (m, 2H), 7.02 – 6.93 (m, 2H), 5.16 (dt,  $J = 10.7, 2.1$  Hz, 1H), 3.43 (ddd,  $J = 7.7, 5.3, 2.2$  Hz, 1H), 3.29 (qd,  $J = 14.2, 6.6$  Hz, 2H), 2.25 (dd,  $J = 13.7, 2.0$  Hz, 1H), 1.76 (dd,  $J = 13.7, 10.7$  Hz, 1H), 1.40 (s, 3H), 1.23 (s, 3H).

$^{13}\text{C}$  NMR (101 MHz, Chloroform-*d*)  $\delta$  168.25, 163.13, 160.70, 149.66, 140.68, 137.87, 133.73, 133.66, 131.13, 131.05, 130.63, 124.42, 123.20, 122.56, 115.62, 115.41, 92.28, 59.39, 59.19, 44.11, 34.44, 30.50, 27.52, 27.08.

$^{19}\text{F}$  NMR (376 MHz, Chloroform-*d*)  $\delta$  -116.38.

HRMS (ESI-TOF):  $m/z$  Calcd for  $\text{C}_{24}\text{H}_{21}\text{FIN}_3\text{NaO}^+$  [ $\text{M}+\text{Na}^+$ ]: 536.0606; found: 536.0608.

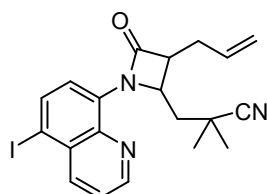

**4am**

$R_f = 0.6$ , Petroleum Ether: Ethyl Acetate = 4: 1 (v/v)

Compound **4am** was prepared following the general procedure in 75% yield (68 mg) as a yellow oil.

$^1\text{H}$  NMR (400 MHz, Chloroform-*d*)  $\delta$  8.83 (dd,  $J = 4.1, 1.7$  Hz, 1H), 8.36 (dd,  $J = 8.6, 1.7$  Hz, 1H), 8.14 (d,  $J = 8.3$  Hz, 1H), 8.06 (d,  $J = 8.2$  Hz, 1H), 7.49 (dd,  $J = 8.6, 4.2$  Hz, 1H), 6.00 (ddt,  $J = 17.1, 10.1, 7.1$  Hz, 1H), 5.28 (dq,  $J = 17.0, 1.5$  Hz, 1H), 5.22 – 5.12 (m, 2H), 3.31 (ddd,  $J = 6.8, 6.0, 2.2$  Hz, 1H), 2.75 (dtt,  $J = 7.0, 5.5, 1.3$  Hz, 2H), 2.31 (dd,  $J = 13.7, 1.9$  Hz, 1H), 1.77 (dd,  $J = 13.6, 10.7$  Hz, 1H), 1.47 (s, 3H), 1.39 (s, 3H).

$^{13}\text{C}$  NMR (101 MHz, Chloroform-*d*)  $\delta$  168.40, 149.72, 140.73, 140.65, 137.91, 134.15, 133.94, 130.65, 124.44, 123.19, 122.46, 118.39, 92.01, 59.31, 57.38, 44.09, 33.31, 30.51, 27.91, 26.97.

HRMS (ESI-TOF):  $m/z$  Calcd for  $\text{C}_{20}\text{H}_{20}\text{IN}_3\text{NaO}^+$  [ $\text{M}+\text{Na}^+$ ]: 468.0543; found: 468.0548.

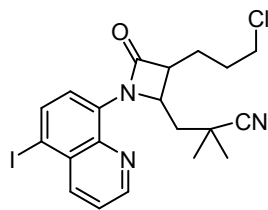

**4an**

$R_f = 0.5$ , Petroleum Ether: Ethyl Acetate = 4: 1 (v/v)

Compound **4an** was prepared following the general procedure in 22% yield (21 mg) as a white solid. m.p. 150-152 °C.

**$^1\text{H NMR}$**  (400 MHz, Chloroform-*d*)  $\delta$  8.84 (dd,  $J = 4.2, 1.6$  Hz, 1H), 8.36 (dd,  $J = 8.6, 1.6$  Hz, 1H), 8.06 (s, 2H), 7.49 (dd,  $J = 8.6, 4.1$  Hz, 1H), 5.18 (d,  $J = 9.8$  Hz, 1H), 2.66 – 2.50 (m, 3H), 2.43 (ddt,  $J = 11.9, 7.4, 3.6$  Hz, 1H), 2.27 (dp,  $J = 11.4, 8.9$  Hz, 1H), 2.06 – 1.96 (m, 2H), 1.77 (dd,  $J = 14.2, 10.0$  Hz, 1H), 1.71 – 1.65 (m, 1H), 1.53 (s, 3H), 1.44 (s, 3H).

**$^{13}\text{C NMR}$**  (101 MHz, Chloroform-*d*)  $\delta$  172.47, 149.73, 141.06, 140.81, 137.98, 133.69, 130.67, 125.02, 123.24, 123.17, 92.14, 64.19, 59.71, 40.27, 30.94, 28.26, 27.76, 27.52, 25.13, 16.47.

**HRMS** (ESI-TOF):  $m/z$  Calcd for  $\text{C}_{20}\text{H}_{22}\text{ClIN}_3\text{O}^+$  [ $\text{M}+\text{H}^+$ ]: 482.0491; found: 482.0482.

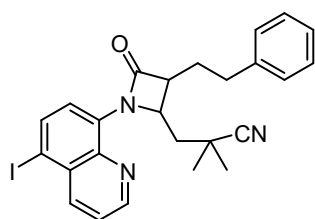

**4ao**

$R_f = 0.4$ , Petroleum Ether: Ethyl Acetate = 8: 1 (v/v)

Compound **4ao** was prepared following the general procedure in 83% yield (85 mg) as a yellow oil.

**$^1\text{H NMR}$**  (400 MHz, Chloroform-*d*)  $\delta$  8.83 (dd,  $J = 4.2, 1.7$  Hz, 1H), 8.37 (dd,  $J = 8.6, 1.6$  Hz, 1H), 8.15 (d,  $J = 8.2$  Hz, 1H), 8.07 (d,  $J = 8.2$  Hz, 1H), 7.49 (dd,  $J = 8.6, 4.1$  Hz, 1H), 7.27 (d,  $J = 4.4$  Hz, 4H), 7.19 (h,  $J = 4.0$  Hz, 1H), 5.16 (dt,  $J = 10.7, 2.0$  Hz, 1H), 3.23 (ddd,  $J = 9.3, 5.1, 2.2$  Hz, 1H), 3.13 – 3.02 (m, 1H), 2.88 (ddd,  $J = 13.8, 9.9,$

6.9 Hz, 1H), 2.45 – 2.23 (m, 3H), 1.72 (dd,  $J = 13.6, 10.7$  Hz, 1H), 1.42 (s, 3H), 1.32 (s, 3H).

$^{13}\text{C}$  NMR (101 MHz, Chloroform-*d*)  $\delta$  168.91, 149.72, 141.45, 140.75, 140.62, 137.89, 133.92, 130.63, 128.67, 128.51, 126.11, 124.33, 123.19, 122.44, 92.02, 60.15, 57.46, 44.16, 33.00, 31.20, 30.50, 27.58, 27.09.

HRMS (ESI-TOF):  $m/z$  Calcd for  $\text{C}_{25}\text{H}_{24}\text{IN}_3\text{NaO}^+$  [ $\text{M}+\text{Na}^+$ ]: 532.0856; found: 532.0863.

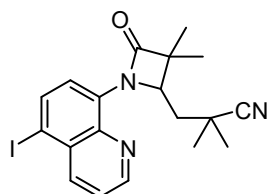

**4ap**

$R_f = 0.5$ , Petroleum Ether: Ethyl Acetate = 4: 1 (v/v)

Compound **4ap** was prepared following the general procedure in 86% yield (74 mg) as a yellow oil.

$^1\text{H}$  NMR (400 MHz, Chloroform-*d*)  $\delta$  8.87 (dd,  $J = 4.2, 1.6$  Hz, 1H), 8.36 (dd,  $J = 8.6, 1.7$  Hz, 1H), 8.06 (d,  $J = 8.2$  Hz, 1H), 7.99 (d,  $J = 8.2$  Hz, 1H), 7.49 (dd,  $J = 8.6, 4.2$  Hz, 1H), 5.18 (dd,  $J = 10.3, 1.4$  Hz, 1H), 2.03 (dd,  $J = 14.4, 1.5$  Hz, 1H), 1.91 (dd,  $J = 14.4, 10.3$  Hz, 1H), 1.59 (s, 3H), 1.48 (s, 3H), 1.42 (s, 3H), 1.36 (s, 3H).

$^{13}\text{C}$  NMR (101 MHz, Chloroform-*d*)  $\delta$  172.96, 149.98, 141.39, 140.63, 137.81, 133.56, 130.67, 124.93, 123.74, 123.19, 92.58, 66.16, 54.16, 39.10, 30.83, 27.95, 27.75, 22.89, 18.16.

HRMS (ESI-TOF):  $m/z$  Calcd for  $\text{C}_{19}\text{H}_{20}\text{IN}_3\text{NaO}^+$  [ $\text{M}+\text{Na}^+$ ]: 456.0543; found: 456.0541.

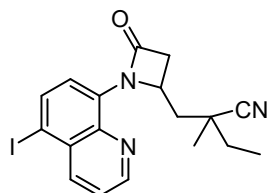

**4as**

$R_f = 0.4$ , Petroleum Ether: Ethyl Acetate = 4: 1 (v/v)

Compound **4as** was prepared following the general procedure in 31% yield (26 mg) as a yellow solid. m.p. 136-138 °C.



**<sup>1</sup>H NMR** (400 MHz, Chloroform-*d*)  $\delta$  8.87 (ddd,  $J = 32.5, 4.1, 1.6$  Hz, 1H), 8.37 (ddd,  $J = 8.6, 3.5, 1.6$  Hz, 1H), 8.12 (d,  $J = 8.2$  Hz, 1H), 8.06 (dd,  $J = 8.2, 1.9$  Hz, 1H), 7.50 (dd,  $J = 8.6, 4.1$  Hz, 1H), 5.48 (ddt,  $J = 13.0, 7.2, 2.2$  Hz, 1H), 3.52 (dt,  $J = 15.2, 5.6$  Hz, 1H), 3.04 (ddd,  $J = 30.1, 15.3, 2.6$  Hz, 1H), 2.54 – 2.23 (m, 1H), 1.82 – 1.73 (m, 1H), 1.68 – 1.62 (m, 2H), 1.57 – 1.49 (m, 1H), 1.50 – 1.39 (m, 3H), 1.06 (dt,  $J = 10.6, 7.4$  Hz, 3H).

**<sup>13</sup>C NMR** (101 MHz, Chloroform-*d*)  $\delta$  165.98, 149.66, 140.82, 140.70, 137.98, 134.05, 130.67, 123.42, 123.23, 122.39, 92.10, 54.02, 45.51, 42.66, 35.68, 33.14, 24.04, 9.28.

**HRMS** (ESI-TOF):  $m/z$  Calcd for  $C_{18}H_{19}IN_3O^+$  [ $M+H^+$ ]: 420.0567; found: 420.0567.

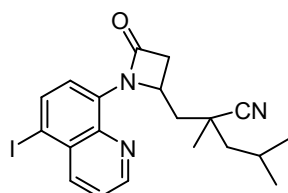

**4at**

$R_f = 0.5$ , Petroleum Ether: Ethyl Acetate = 4: 1 (v/v)

Compound **4at** was prepared following the general procedure in 29% yield (26 mg) as a yellow solid. m.p. 146-148 °C.

**<sup>1</sup>H NMR** (400 MHz, Chloroform-*d*)  $\delta$  8.81 (dd,  $J = 4.1, 1.6$  Hz, 1H), 8.38 (dd,  $J = 8.5, 1.6$  Hz, 1H), 8.12 (d,  $J = 8.2$  Hz, 1H), 8.06 (d,  $J = 8.2$  Hz, 1H), 7.50 (dd,  $J = 8.6, 4.1$  Hz, 1H), 5.46 (ddt,  $J = 10.7, 4.6, 2.0$  Hz, 1H), 3.54 (dd,  $J = 15.5, 5.2$  Hz, 1H), 3.09 (dd,  $J = 15.5, 2.5$  Hz, 1H), 2.24 (dd,  $J = 13.5, 1.8$  Hz, 1H), 1.91 – 1.76 (m, 2H), 1.50 (s, 3H), 1.47 – 1.40 (m, 2H), 1.02 (d,  $J = 6.7$  Hz, 3H), 1.00 (d,  $J = 6.7$  Hz, 3H).

**<sup>13</sup>C NMR** (101 MHz, Chloroform-*d*)  $\delta$  166.05, 149.62, 140.80, 140.71, 137.99, 134.05, 130.67, 124.06, 123.22, 122.44, 92.10, 53.95, 48.78, 45.61, 43.76, 33.90, 25.26, 25.07, 24.23, 23.80.

**HRMS** (ESI-TOF):  $m/z$  Calcd for  $C_{20}H_{22}IN_3NaO^+$  [ $M+Na^+$ ]: 470.0700; found: 470.0704.

## 7. Gram-scale Reactions

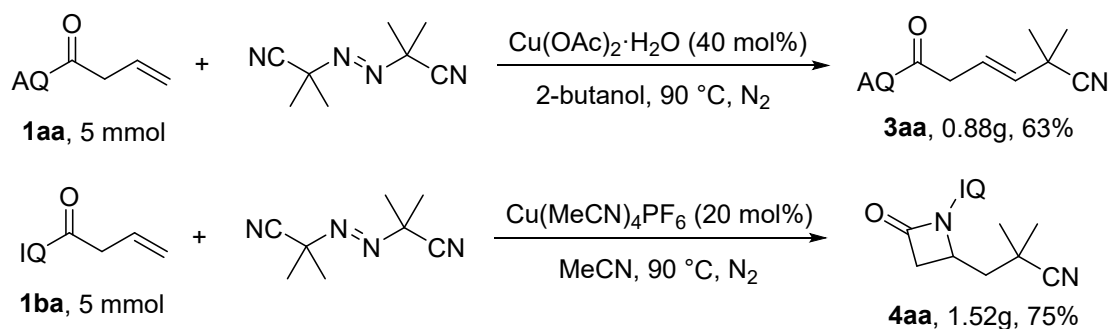

**Scheme S15. Gram-scale reactions**

a) The alkenes substrate **1aa** (1.06g, 5 mmol, 1 equiv), azo compounds **2a** (2.46g, 15 mmol, 3 equiv),  $\text{Cu(OAc)}_2\cdot\text{H}_2\text{O}$  (0.4g, 2 mmol, 0.4 equiv), 2-butanol (25 mL) were added into a 50 mL sealed glass vial under  $\text{N}_2$  atmosphere. The reaction mixture was heated at  $90\text{ }^\circ\text{C}$  for 12 h. After being cooled to room temperature, the mixture was concentrated in vacuo and purified by silica gel (300 - 400 mesh) column chromatography to give the desired products 0.88g.

b) The alkenes substrate **1ba** (1.69g, 5 mmol, 1 equiv), azo compounds **2a** (3.28g, 20 mmol, 4 equiv),  $\text{Cu(MeCN)}_4\text{PF}_6$  (0.38g, 1 mmol, 0.2 equiv), MeCN (50 mL) were added into a 100 mL sealed glass vial under  $\text{N}_2$  atmosphere. The reaction mixture was heated at  $90\text{ }^\circ\text{C}$  for 12 h. After being cooled to room temperature, the mixture was concentrated in vacuo and purified by silica gel (300 - 400 mesh) column chromatography to give the desired products 1.52g.

## 8. Mechanistic Experiments

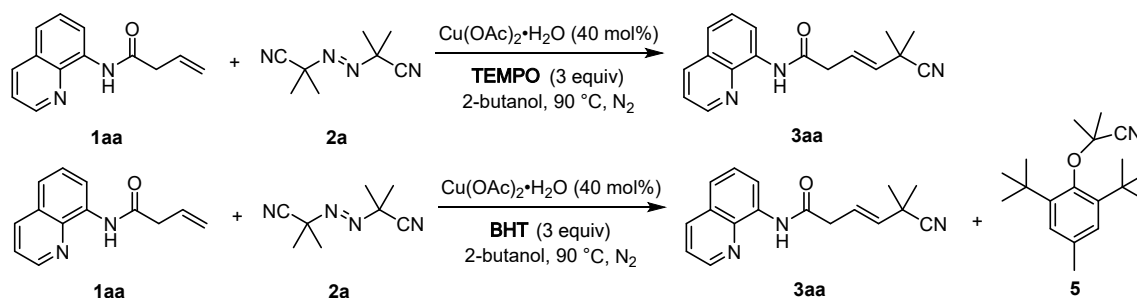

**Scheme S16. Mechanistic Experiments of 1aa**

a) The alkenes substrate **1aa** (0.0424g, 0.2 mmol, 1 equiv), azo compounds **2a** (0.0984g, 0.6 mmol, 3 equiv), Cu(OAc)<sub>2</sub>·H<sub>2</sub>O (16mg, 0.08 mmol, 0.4 equiv), TEMPO (0.0938g, 0.6 mmol, 3 equiv), 2-butanol (1 mL) were added into a 15 mL sealed glass vial under N<sub>2</sub> atmosphere. The reaction mixture was heated at 90 °C for 12 h. After being cooled to room temperature, the mixture was concentrated *in vacuo* and purified by silica gel (300 - 400 mesh) column chromatography to give the desired products.

b) The alkenes substrate **1aa** (0.0424g, 0.2 mmol, 1 equiv), azo compounds **2a** (0.0984g, 0.6 mmol, 3 equiv), Cu(OAc)<sub>2</sub>·H<sub>2</sub>O (16mg, 0.08 mmol, 0.4 equiv), BHT (0.1322g, 0.6 mmol, 3 equiv), 2-butanol (1 mL) were added into a 15 mL sealed glass vial under N<sub>2</sub> atmosphere. The reaction mixture was heated at 90 °C for 12 h. After being cooled to room temperature, the mixture was concentrated *in vacuo* and purified by silica gel (300 - 400 mesh) column chromatography to give the product **5**.

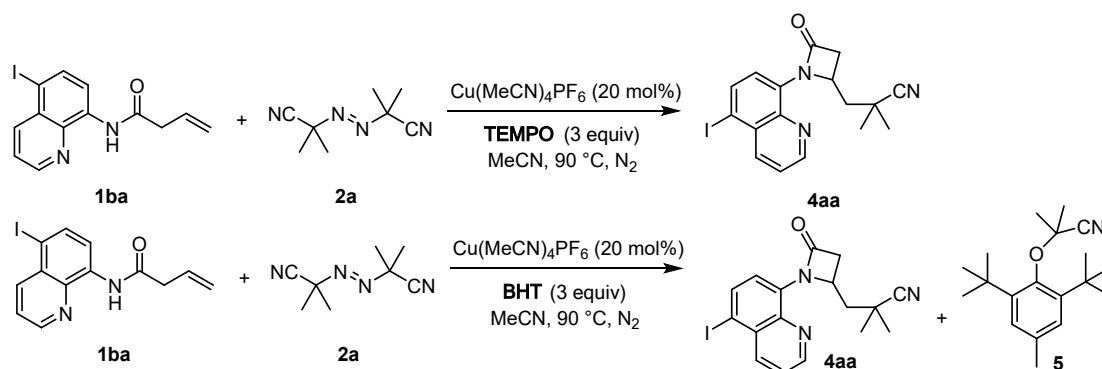

**Scheme S17. Mechanistic Experiments of 1ba**

a) The alkenes substrate **1ba** (0.0676g, 0.2 mmol, 1 equiv), azo compounds **2a** (0.1312g, 0.8 mmol, 4 equiv), Cu(MeCN)<sub>4</sub>PF<sub>6</sub> (15mg, 0.04 mmol, 0.2 equiv), TEMPO (0.0938g, 0.6 mmol, 3 equiv), MeCN (2 mL) were added into a 15 mL sealed glass vial under N<sub>2</sub> atmosphere. The reaction mixture was heated at 90 °C for 12 h. After being cooled to room temperature, the mixture was concentrated *in vacuo* and purified by silica gel (300 - 400 mesh) column chromatography to give the desired products.

b) The alkenes substrate **1ba** (0.0676g, 0.2 mmol, 1 equiv), azo compounds **2a** (0.1312g, 0.8 mmol, 4 equiv), Cu(MeCN)<sub>4</sub>PF<sub>6</sub> (15mg, 0.04 mmol, 0.2 equiv), BHT (0.1322g, 0.6 mmol, 3 equiv), MeCN (2 mL) were added into a 15 mL sealed glass vial under N<sub>2</sub> atmosphere. The reaction mixture was heated at 90 °C for 12 h. After being cooled to room temperature, the mixture was concentrated *in vacuo* and purified by silica gel (300 - 400 mesh) column chromatography to give the product **5**.

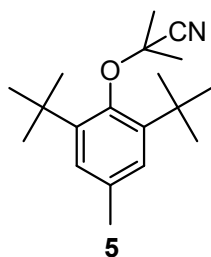

R<sub>f</sub> = 0.5, Petroleum Ether: Ethyl Acetate = 10: 1 (v/v)

Compound **5** was prepared following the general procedure as a white solid. m.p. 106-108 °C.

<sup>1</sup>H NMR (400 MHz, Chloroform-*d*) δ 6.52 (s, 2H), 1.40 (s, 3H), 1.28 (s, 6H), 1.23 (s, 18H).

<sup>13</sup>C NMR (101 MHz, Chloroform-*d*) δ 185.67, 149.41, 140.81, 123.57, 42.81, 39.88, 35.24, 29.55, 23.00, 22.70.

HRMS (ESI-TOF): m/z Calcd for C<sub>19</sub>H<sub>30</sub>NO<sup>+</sup> [M+H<sup>+</sup>]: 288.2322; found: 288.2317.

## 9. X-Ray Crystallography

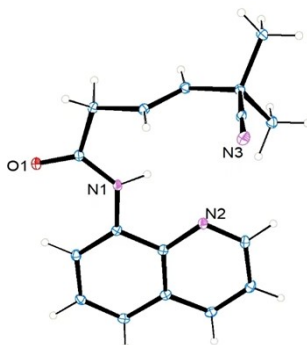

X-ray structure of compound 3aa

mo\_b230717b\_0m

Table S3 Crystal data and structure refinement for mo\_b230717b\_0m.

|                                        |                                                               |
|----------------------------------------|---------------------------------------------------------------|
| Identification code                    | mo_b230717b_0m                                                |
| Empirical formula                      | C <sub>17</sub> H <sub>17</sub> N <sub>3</sub> O              |
| Formula weight                         | 279.33                                                        |
| Temperature/K                          | 100.0                                                         |
| Crystal system                         | triclinic                                                     |
| Space group                            | P-1                                                           |
| a/Å                                    | 8.6338(15)                                                    |
| b/Å                                    | 8.7425(17)                                                    |
| c/Å                                    | 10.074(2)                                                     |
| $\alpha$ /°                            | 90.512(7)                                                     |
| $\beta$ /°                             | 105.948(6)                                                    |
| $\gamma$ /°                            | 95.537(6)                                                     |
| Volume/Å <sup>3</sup>                  | 727.2(2)                                                      |
| Z                                      | 2                                                             |
| $\rho_{\text{calc}}/\text{cm}^3$       | 1.276                                                         |
| $\mu/\text{mm}^{-1}$                   | 0.082                                                         |
| F(000)                                 | 296.0                                                         |
| Crystal size/mm <sup>3</sup>           | 0.2 × 0.1 × 0.05                                              |
| Radiation                              | MoK $\alpha$ ( $\lambda$ = 0.71073)                           |
| 2 $\theta$ range for data collection/° | 5.528 to 55.054                                               |
| Index ranges                           | -11 ≤ h ≤ 11, -11 ≤ k ≤ 11, -13 ≤ l ≤ 13                      |
| Reflections collected                  | 15069                                                         |
| Independent reflections                | 3298 [R <sub>int</sub> = 0.0703, R <sub>sigma</sub> = 0.0512] |
| Data/restraints/parameters             | 3298/0/192                                                    |

|                                             |                                                   |
|---------------------------------------------|---------------------------------------------------|
| Goodness-of-fit on F <sup>2</sup>           | 1.086                                             |
| Final R indexes [I>=2σ (I)]                 | R <sub>1</sub> = 0.0591, wR <sub>2</sub> = 0.1348 |
| Final R indexes [all data]                  | R <sub>1</sub> = 0.0720, wR <sub>2</sub> = 0.1445 |
| Largest diff. peak/hole / e Å <sup>-3</sup> | 0.33/-0.31                                        |

**Table S4 Fractional Atomic Coordinates (×10<sup>4</sup>) and Equivalent Isotropic Displacement Parameters (Å<sup>2</sup>×10<sup>3</sup>) for mo\_b230717b\_0m. U<sub>eq</sub> is defined as 1/3 of of the trace of the orthogonalised U<sub>ij</sub> tensor.**

| Atom | x          | y          | z           | U(eq)   |
|------|------------|------------|-------------|---------|
| O001 | 249.0(15)  | 1542.1(13) | 6793.6(13)  | 24.6(3) |
| N002 | 2781.8(16) | 5959.7(16) | 4929.3(14)  | 20.0(3) |
| N003 | 1521.9(17) | 3743.9(16) | 6223.4(14)  | 19.5(3) |
| N004 | 5412.8(18) | 7477.8(17) | 10331.1(16) | 25.3(3) |
| C005 | 4142(2)    | 7728.1(19) | 9716.7(17)  | 19.6(4) |
| C006 | 2514.9(19) | 8071.4(19) | 8892.4(17)  | 19.5(4) |
| C007 | 1941.9(19) | 3278.8(19) | 5045.3(17)  | 18.6(3) |
| C008 | 3034(2)    | 2597(2)    | 2736.7(18)  | 22.7(4) |
| C009 | 2325(2)    | 1468(2)    | 3371.6(18)  | 22.1(4) |
| C00A | 1393(2)    | 6593.2(19) | 8533.1(17)  | 20.4(4) |
| C00B | 780.1(19)  | 2890.9(19) | 7038.0(17)  | 19.0(3) |
| C00C | 615(2)     | 3759.3(19) | 8302.5(18)  | 20.4(4) |
| C00D | 1783.2(19) | 5180.0(19) | 8762.0(17)  | 18.8(3) |
| C00E | 3951(2)    | 5385(2)    | 2657.0(18)  | 22.5(4) |
| C00F | 2659.7(18) | 4495.6(19) | 4392.4(17)  | 18.8(4) |
| C00G | 3454(2)    | 7075(2)    | 4336.3(18)  | 22.1(4) |
| C00H | 2704(2)    | 8816(2)    | 7556.0(18)  | 23.9(4) |
| C00I | 1780.1(19) | 1792.9(19) | 4533.1(17)  | 20.5(4) |
| C00J | 4069(2)    | 6842(2)    | 3199.1(18)  | 23.4(4) |
| C00K | 1843(2)    | 9180(2)    | 9736(2)     | 26.4(4) |
| C00L | 3219.9(19) | 4145(2)    | 3237.6(17)  | 20.6(4) |

**Table S5 Anisotropic Displacement Parameters ( $\text{\AA}^2 \times 10^3$ ) for mo\_b230717b\_0m. The Anisotropic displacement factor exponent takes the form:  $-2\pi^2[h^2a^*2U_{11}+2hka^*b^*U_{12}+\dots]$ .**

| Atom | $U_{11}$ | $U_{22}$ | $U_{33}$ | $U_{23}$ | $U_{13}$ | $U_{12}$ |
|------|----------|----------|----------|----------|----------|----------|
| O001 | 27.7(6)  | 16.4(6)  | 31.1(7)  | -0.1(5)  | 11.6(5)  | -1.4(5)  |
| N002 | 19.3(7)  | 18.1(7)  | 21.4(7)  | 0.8(6)   | 3.8(5)   | 0.7(5)   |
| N003 | 23.4(7)  | 14.0(7)  | 21.4(7)  | -0.8(5)  | 7.8(6)   | -1.3(5)  |
| N004 | 22.5(7)  | 26.0(8)  | 26.9(8)  | 3.3(6)   | 6.8(6)   | -0.4(6)  |
| C005 | 22.8(8)  | 17.9(8)  | 19.5(8)  | -1.2(6)  | 10.0(7)  | -3.4(6)  |
| C006 | 19.3(8)  | 17.4(8)  | 21.7(8)  | -0.4(6)  | 5.7(6)   | 1.3(6)   |
| C007 | 15.1(7)  | 21.0(8)  | 18.2(8)  | 2.0(6)   | 2.3(6)   | 1.4(6)   |
| C008 | 19.9(8)  | 26.8(9)  | 21.5(8)  | -3.1(7)  | 5.6(6)   | 4.3(7)   |
| C009 | 20.2(8)  | 19.7(8)  | 24.7(9)  | -3.6(7)  | 3.4(7)   | 2.6(6)   |
| C00A | 17.0(8)  | 21.9(9)  | 22.0(8)  | -1.0(7)  | 5.6(6)   | 0.8(6)   |
| C00B | 15.1(7)  | 17.2(8)  | 23.2(8)  | 2.0(6)   | 2.8(6)   | 2.0(6)   |
| C00C | 20.2(8)  | 18.9(8)  | 22.6(8)  | 0.7(6)   | 7.6(6)   | -0.6(6)  |
| C00D | 17.6(7)  | 20.6(8)  | 17.8(8)  | 0.3(6)   | 4.6(6)   | 0.6(6)   |
| C00E | 18.0(8)  | 30.9(10) | 18.7(8)  | 2.7(7)   | 5.1(6)   | 2.6(7)   |
| C00F | 14.6(7)  | 20.9(8)  | 18.5(8)  | 1.4(6)   | 0.7(6)   | 1.6(6)   |
| C00G | 21.7(8)  | 18.6(8)  | 23.1(9)  | 2.2(7)   | 2.0(7)   | -0.8(6)  |
| C00H | 27.0(9)  | 20.4(9)  | 24.5(9)  | 2.1(7)   | 7.5(7)   | 2.2(7)   |
| C00I | 19.2(8)  | 18.5(8)  | 22.2(8)  | 0.6(6)   | 3.6(6)   | 0.3(6)   |
| C00J | 20.1(8)  | 26.4(9)  | 22.0(9)  | 7.3(7)   | 3.7(7)   | -0.5(7)  |
| C00K | 26.4(9)  | 20.6(9)  | 34.7(10) | -5.3(7)  | 13.6(8)  | 0.5(7)   |
| C00L | 15.7(7)  | 25.6(9)  | 18.9(8)  | 1.3(7)   | 2.0(6)   | 2.1(6)   |

**Table S6 Bond Lengths for mo\_b230717b\_0m.**

| Atom Atom | Length/ $\text{\AA}$ | Atom Atom | Length/ $\text{\AA}$ |
|-----------|----------------------|-----------|----------------------|
| O001 C00B | 1.221(2)             | C007 C00I | 1.374(2)             |
| N002 C00F | 1.368(2)             | C008 C009 | 1.366(3)             |
| N002 C00G | 1.317(2)             | C008 C00L | 1.419(2)             |
| N003 C007 | 1.400(2)             | C009 C00I | 1.412(2)             |
| N003 C00B | 1.359(2)             | C00A C00D | 1.317(2)             |
| N004 C005 | 1.145(2)             | C00B C00C | 1.524(2)             |
| C005 C006 | 1.482(2)             | C00C C00D | 1.505(2)             |
| C006 C00A | 1.515(2)             | C00E C00J | 1.365(3)             |
| C006 C00H | 1.543(2)             | C00E C00L | 1.414(2)             |
| C006 C00K | 1.538(2)             | C00F C00L | 1.419(2)             |
| C007 C00F | 1.434(2)             | C00G C00J | 1.410(3)             |

**Table S7 Bond Angles for mo\_b230717b\_0m.**

| Atom Atom Atom Angle/°    | Atom Atom Atom Angle/°    |
|---------------------------|---------------------------|
| C00G N002 C00F 117.69(15) | O001 C00B N003 124.19(16) |
| C00B N003 C007 128.98(14) | O001 C00B C00C 121.08(15) |
| N004 C005 C006 178.46(18) | N003 C00B C00C 114.72(14) |
| C005 C006 C00A 109.68(14) | C00D C00C C00B 115.28(14) |
| C005 C006 C00H 107.65(13) | C00A C00D C00C 124.13(15) |
| C005 C006 C00K 109.18(14) | C00J C00E C00L 119.86(16) |
| C00A C006 C00H 109.67(14) | N002 C00F C007 117.73(15) |
| C00A C006 C00K 110.06(14) | N002 C00F C00L 122.77(15) |
| C00K C006 C00H 110.56(14) | C00L C00F C007 119.49(15) |
| N003 C007 C00F 114.60(14) | N002 C00G C00J 123.84(16) |
| C00I C007 N003 125.61(15) | C007 C00I C009 119.98(16) |
| C00I C007 C00F 119.73(15) | C00E C00J C00G 118.83(16) |
| C009 C008 C00L 119.77(16) | C008 C00L C00F 119.23(16) |
| C008 C009 C00I 121.78(16) | C00E C00L C008 123.78(16) |
| C00D C00A C006 127.21(15) | C00E C00L C00F 116.99(16) |

**Table S8 Torsion Angles for mo\_b230717b\_0m.**

| A B C D Angle/°                 | A B C D Angle/°                 |
|---------------------------------|---------------------------------|
| O001 C00B C00C C00D 159.44(15)  | C009 C008 C00L C00F -0.2(2)     |
| N002 C00F C00L C008 -179.41(14) | C00B N003 C007 C00F 177.56(15)  |
| N002 C00F C00L C00E 1.0(2)      | C00B N003 C007 C00I -5.2(3)     |
| N002 C00G C00J C00E 0.9(3)      | C00B C00C C00D C00A 103.44(19)  |
| N003 C007 C00F N002 -3.2(2)     | C00F N002 C00G C00J -0.9(2)     |
| N003 C007 C00F C00L 176.34(13)  | C00F C007 C00I C009 0.2(2)      |
| N003 C007 C00I C009 -176.88(15) | C00G N002 C00F C007 179.44(14)  |
| N003 C00B C00C C00D -21.8(2)    | C00G N002 C00F C00L -0.1(2)     |
| C005 C006 C00A C00D -6.9(2)     | C00H C006 C00A C00D 111.15(19)  |
| C006 C00A C00D C00C -176.42(15) | C00I C007 C00F N002 179.37(14)  |
| C007 N003 C00B O001 -5.3(3)     | C00I C007 C00F C00L -1.1(2)     |
| C007 N003 C00B C00C 175.95(15)  | C00J C00E C00L C008 179.48(15)  |
| C007 C00F C00L C008 1.1(2)      | C00J C00E C00L C00F -0.9(2)     |
| C007 C00F C00L C00E -178.53(14) | C00K C006 C00A C00D -127.01(19) |
| C008 C009 C00I C007 0.7(2)      | C00L C008 C009 C00I -0.7(3)     |
| C009 C008 C00L C00E 179.37(16)  | C00L C00E C00J C00G 0.1(2)      |



**Table S9 Hydrogen Atom Coordinates ( $\text{\AA}\times 10^4$ ) and Isotropic Displacement Parameters ( $\text{\AA}^2\times 10^3$ ) for mo\_b230717b\_0m.**

| Atom | x       | y        | z        | U(eq) |
|------|---------|----------|----------|-------|
| H003 | 1773.14 | 4724.43  | 6470.38  | 23    |
| H008 | 3400.23 | 2346.17  | 1962.57  | 27    |
| H009 | 2195    | 436.98   | 3021.93  | 26    |
| H00A | 286.23  | 6697.15  | 8094.27  | 24    |
| H00B | -501.31 | 4058.11  | 8099.85  | 24    |
| H00C | 763.55  | 3051.33  | 9078.95  | 24    |
| H00D | 2870.21 | 5049.38  | 9247.49  | 23    |
| H00E | 4359.78 | 5204.87  | 1891.18  | 27    |
| H00G | 3527.78 | 8095.59  | 4696.27  | 27    |
| H00F | 3411.28 | 9783.14  | 7790.92  | 36    |
| H00H | 1639.14 | 9024.03  | 6973.92  | 36    |
| H00I | 3183.03 | 8115.15  | 7054.09  | 36    |
| H00J | 1301.88 | 984.08   | 4960.36  | 25    |
| H00K | 4556.55 | 7684.43  | 2816.68  | 28    |
| H00L | 1754.27 | 8698.8   | 10590.66 | 40    |
| H00M | 770.79  | 9417.25  | 9192.38  | 40    |
| H00N | 2575.85 | 10132.15 | 9963.74  | 40    |

**mo\_b230717b\_0m**

**Table S10 Crystal data and structure refinement for mo\_b230717b\_0m.**

|                                  |                                                |
|----------------------------------|------------------------------------------------|
| Identification code              | mo_b230717b_0m                                 |
| Empirical formula                | $\text{C}_{17}\text{H}_{17}\text{N}_3\text{O}$ |
| Formula weight                   | 279.33                                         |
| Temperature/K                    | 100.0                                          |
| Crystal system                   | triclinic                                      |
| Space group                      | P-1                                            |
| a/ $\text{\AA}$                  | 8.6338(15)                                     |
| b/ $\text{\AA}$                  | 8.7425(17)                                     |
| c/ $\text{\AA}$                  | 10.074(2)                                      |
| $\alpha/^\circ$                  | 90.512(7)                                      |
| $\beta/^\circ$                   | 105.948(6)                                     |
| $\gamma/^\circ$                  | 95.537(6)                                      |
| Volume/ $\text{\AA}^3$           | 727.2(2)                                       |
| Z                                | 2                                              |
| $\rho_{\text{calc}}/\text{cm}^3$ | 1.276                                          |
| $\mu/\text{mm}^{-1}$             | 0.082                                          |
| F(000)                           | 296.0                                          |
| Crystal size/ $\text{mm}^3$      | $0.2 \times 0.1 \times 0.05$                   |

|                                                  |                                                                    |
|--------------------------------------------------|--------------------------------------------------------------------|
| Radiation                                        | MoK $\alpha$ ( $\lambda = 0.71073$ )                               |
| 2 $\Theta$ range for data collection/ $^{\circ}$ | 5.528 to 55.054                                                    |
| Index ranges                                     | $-11 \leq h \leq 11$ , $-11 \leq k \leq 11$ , $-13 \leq l \leq 13$ |
| Reflections collected                            | 15069                                                              |
| Independent reflections                          | 3298 [ $R_{\text{int}} = 0.0703$ , $R_{\text{sigma}} = 0.0512$ ]   |
| Data/restraints/parameters                       | 3298/0/192                                                         |
| Goodness-of-fit on $F^2$                         | 1.086                                                              |
| Final R indexes [ $I \geq 2\sigma(I)$ ]          | $R_1 = 0.0591$ , $wR_2 = 0.1348$                                   |
| Final R indexes [all data]                       | $R_1 = 0.0720$ , $wR_2 = 0.1445$                                   |
| Largest diff. peak/hole / $e \text{ \AA}^{-3}$   | 0.33/-0.31                                                         |

## 10. References

- [20] P. Shi, J. Wang, Z. Gan, J. Zhang, R. Zeng, Y. Zhao, *Chem. Commun.* **2019**, 55, 10523–10526.
- [21] H. Zhang, X. Lv, H. Yu, Z. Bai, G. Chen, G. He, *Org. Lett.* **2021**, 23, 3620–3625.
- [22] C.-B. Huang, L.-J. Chen, J. Huang, L. Xu, *RSC Adv.* **2014**, 4, 19538.
- [23] M. L. Czyz, D. W. Lupton, A. Polyzos, *Chemistry A European J* **2017**, 23, 14450–14453.
- [24] W. Su, J. Cui, R. Zeng, *ChemistryOpen* **2023**, 12, e202300068.

# 11. NMR Spectra

## <sup>1</sup>H NMR of 1aa (CDCl<sub>3</sub>, 400 MHz)

Jun25-2023-h400-cj-0625-01.10.fid

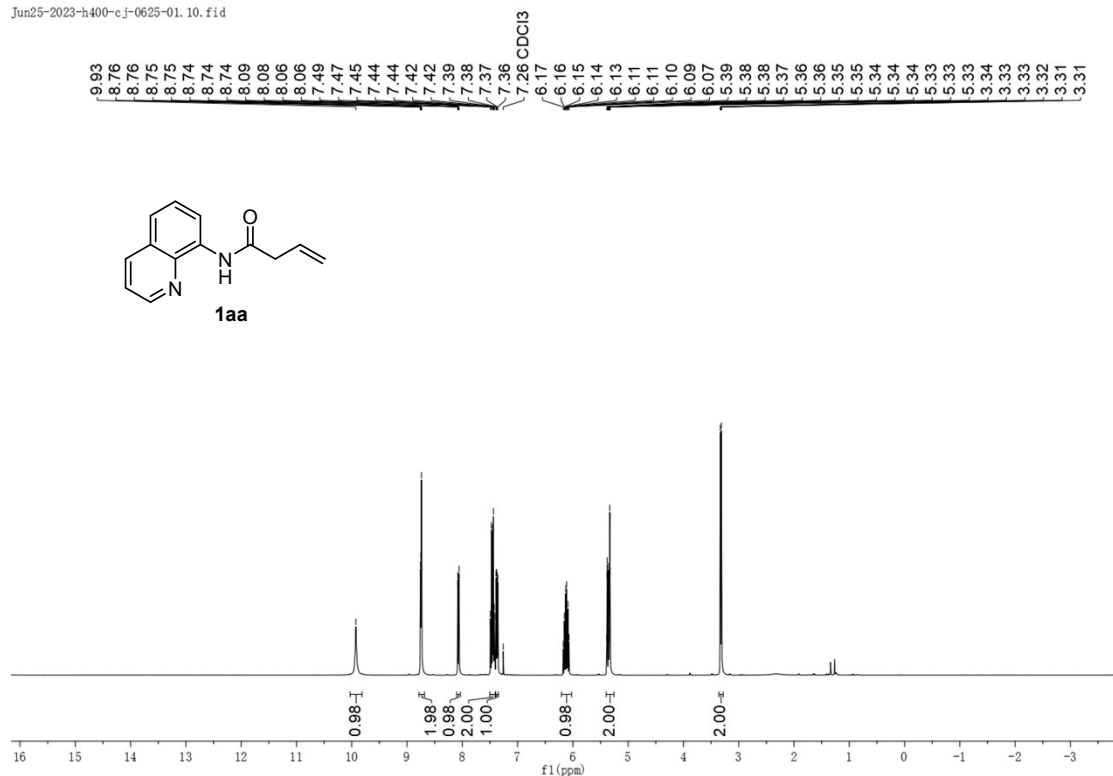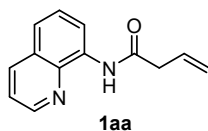

## <sup>13</sup>C NMR of 1aa (CDCl<sub>3</sub>, 101 MHz)

Jun25-2023-c400-cj-0625-01.11.fid

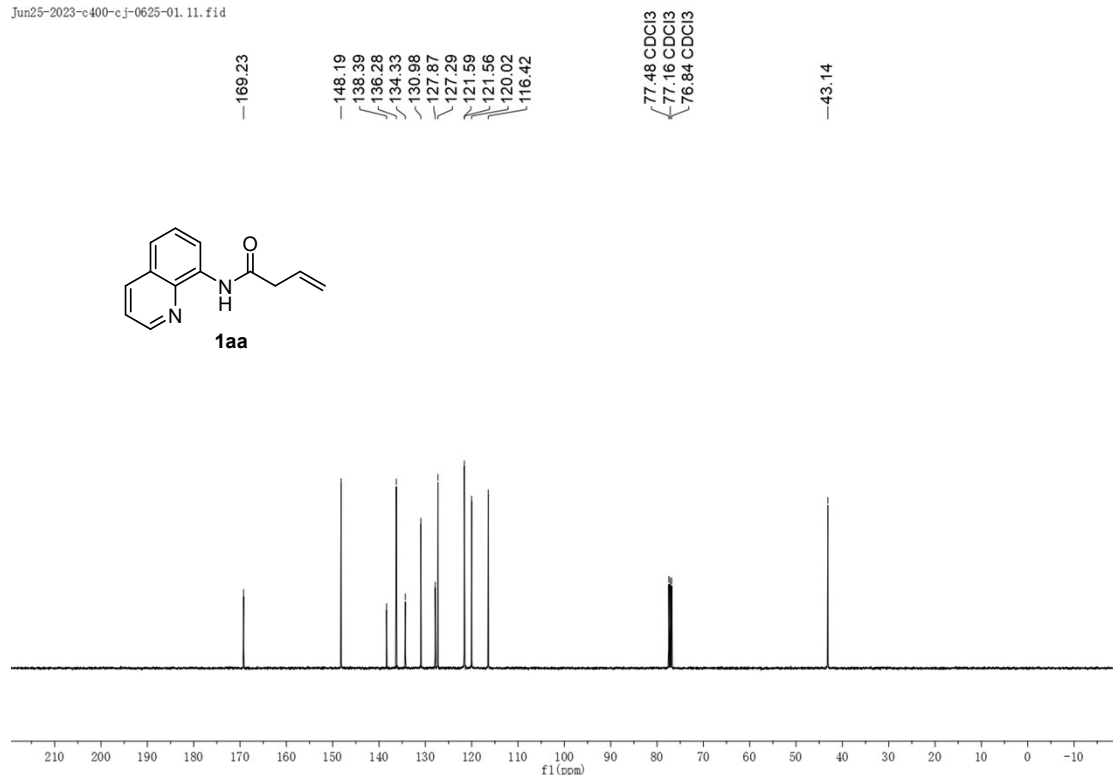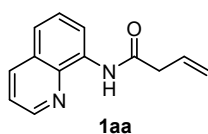

# <sup>1</sup>H NMR of 1ba (CDCl<sub>3</sub>, 400 MHz)

Nov10-2022-H400-CJ-11110-IQ. 10. fid

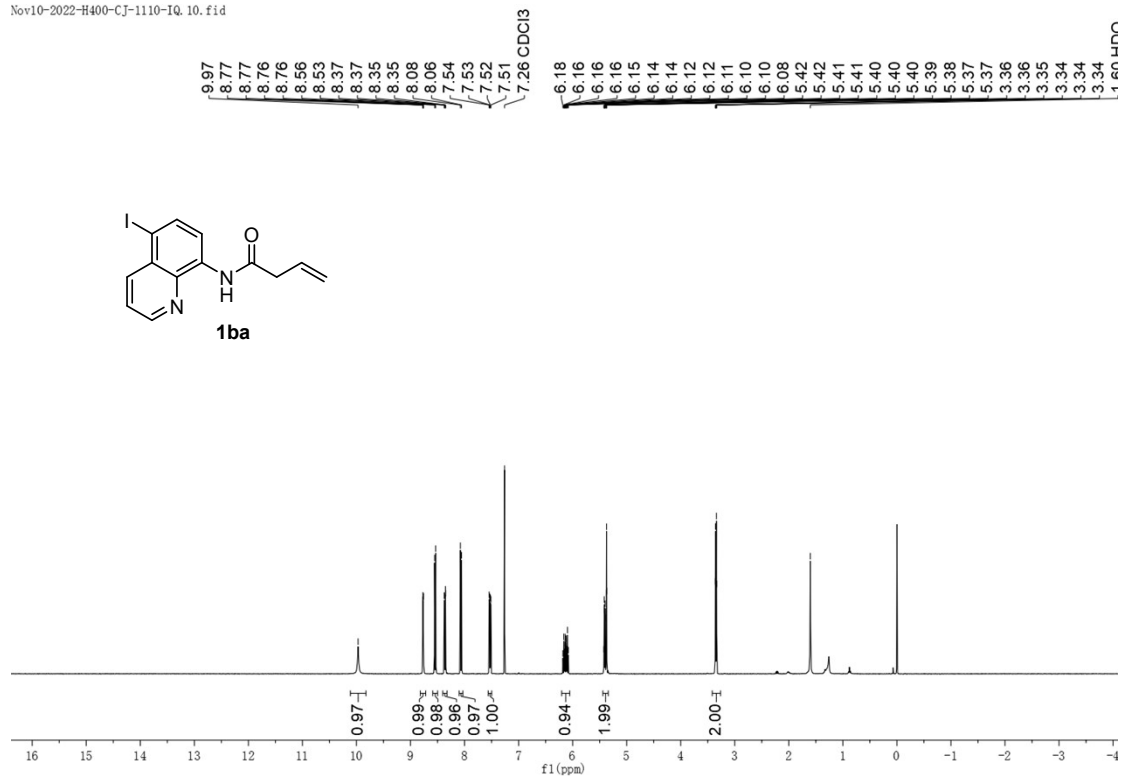

# <sup>13</sup>C NMR of 1ba (CDCl<sub>3</sub>, 101 MHz)

Nov10-2022-C400-CJ-11110-IQ. 12. fid

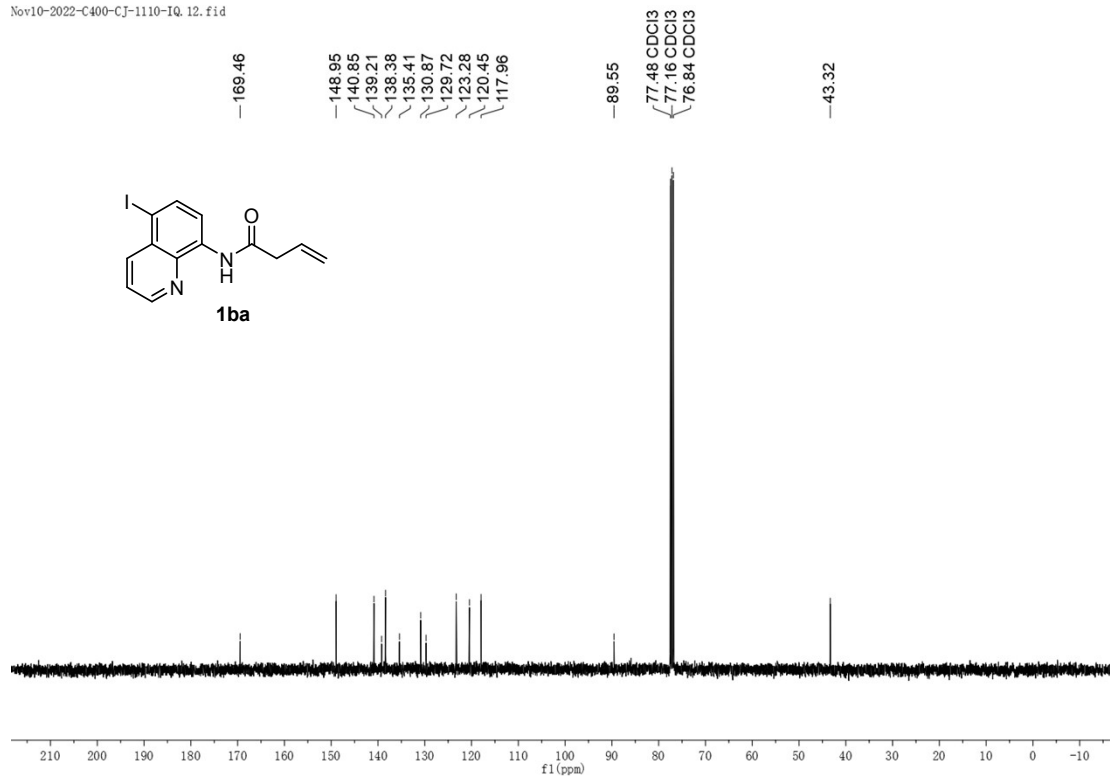

# <sup>1</sup>H NMR of 1c (CDCl<sub>3</sub>, 400 MHz)

Nov24-2023-h400-cj-1124-C10.10.fid

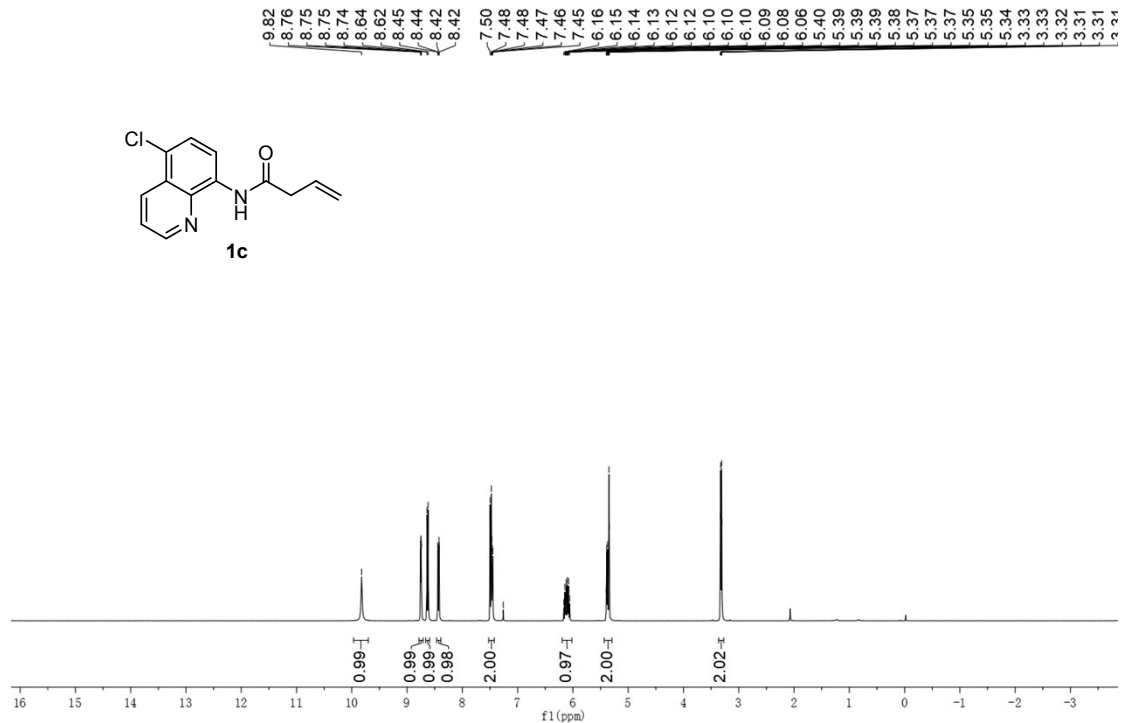

# <sup>13</sup>C NMR of 1c (CDCl<sub>3</sub>, 101 MHz)

Nov24-2023-c400-cj-1124-C10.11.fid

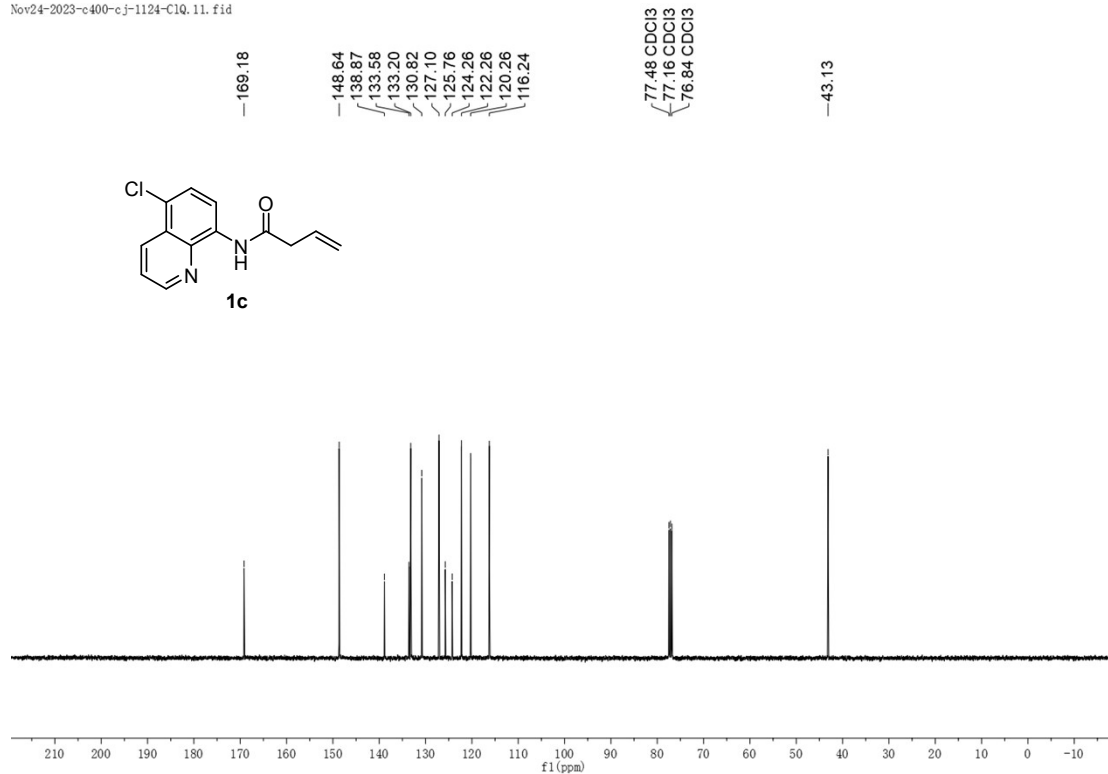

# <sup>1</sup>H NMR of 1d (CDCl<sub>3</sub>, 400 MHz)

Jun06-2023-H400-cj-0606-BQ.20.fid

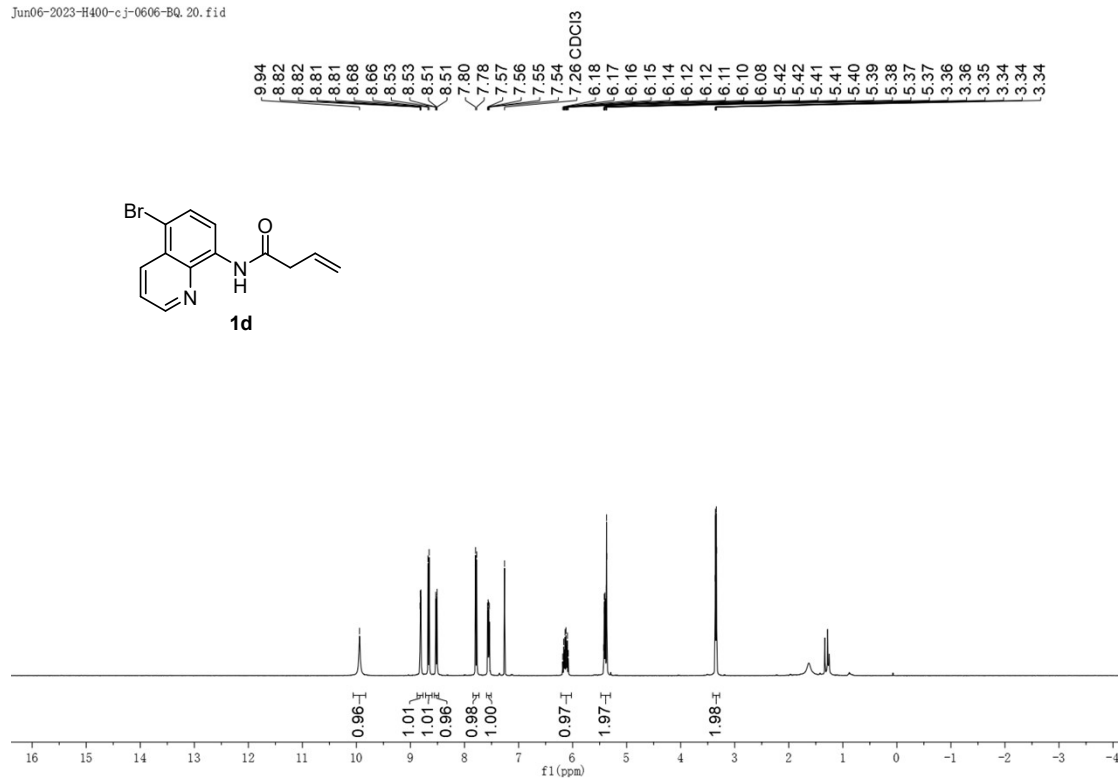

# <sup>13</sup>C NMR of 1d (CDCl<sub>3</sub>, 101 MHz)

Jun06-2023-C400-cj-0606-BQ.22.fid

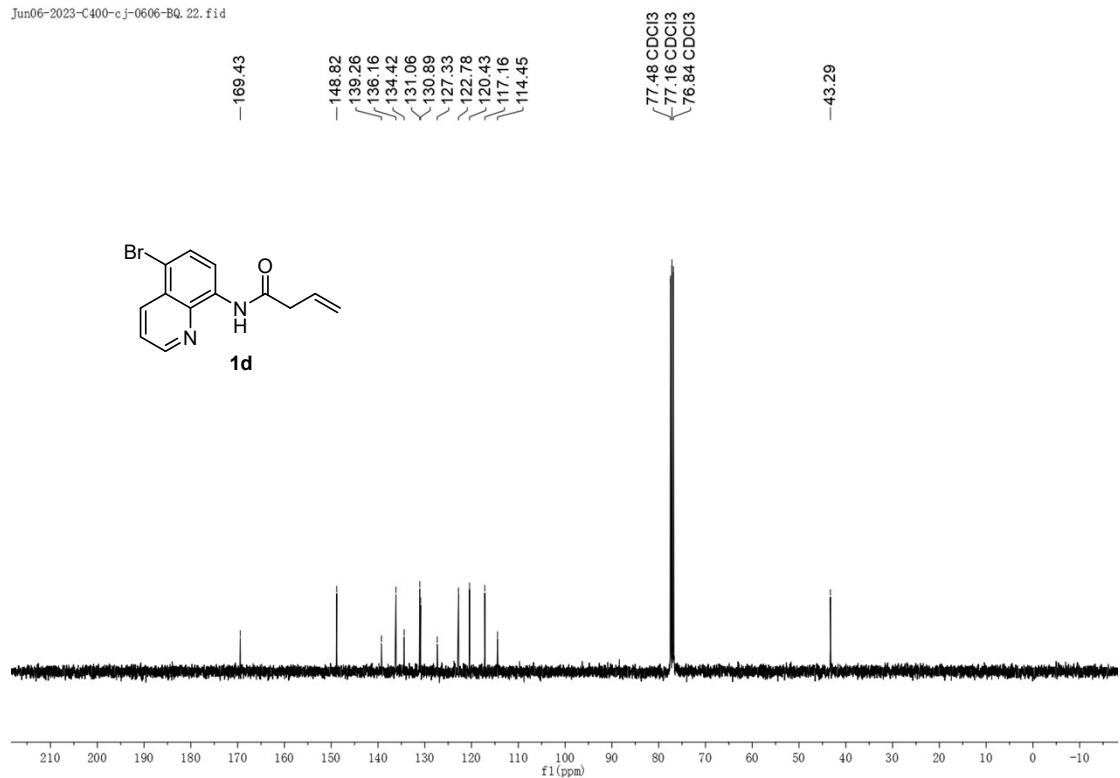

# <sup>1</sup>H NMR of 1ab (CDCl<sub>3</sub>, 400 MHz)

Jul24-2023-h400-cj-0724-03.10.fid

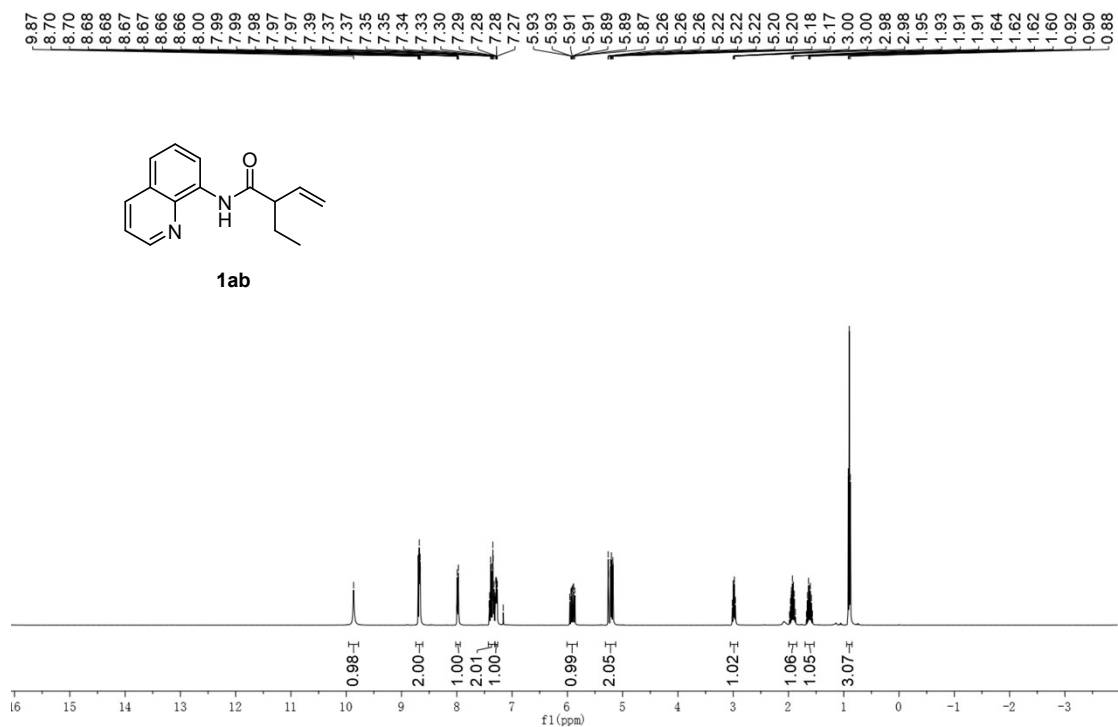

# <sup>13</sup>C NMR of 1ab (CDCl<sub>3</sub>, 101 MHz)

Jul25-2023-c400-cj-0724-03.10.fid

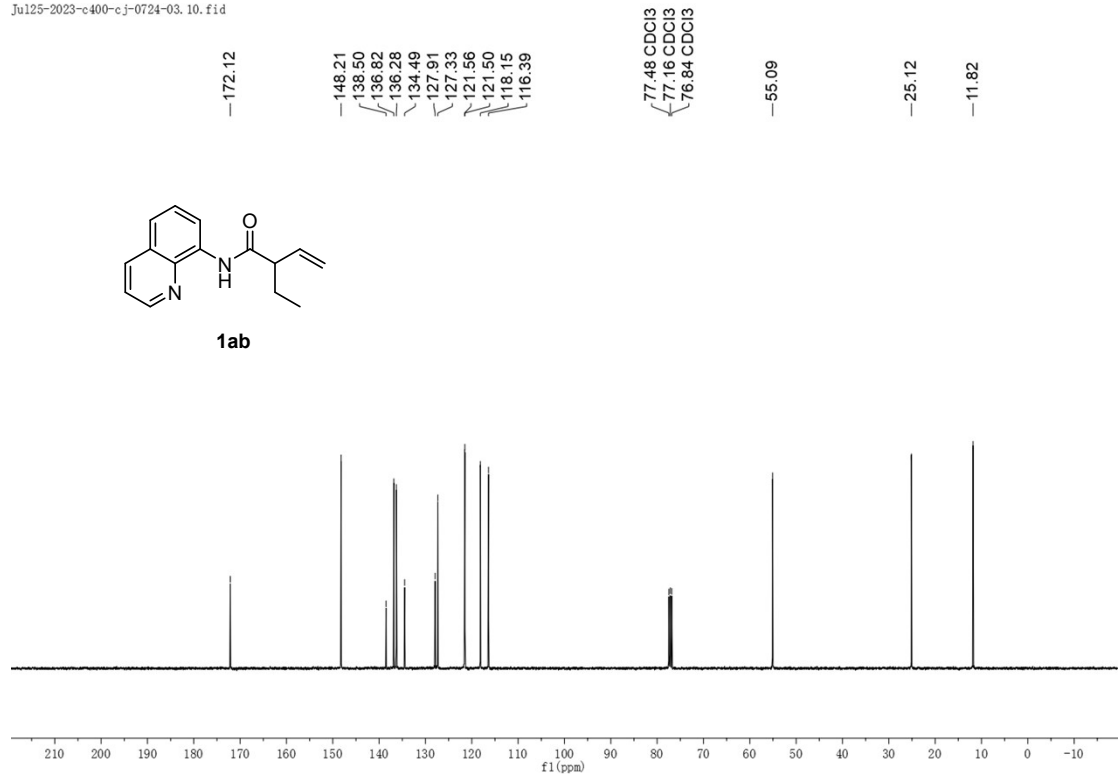

# <sup>1</sup>H NMR of 1ac (CDCl<sub>3</sub>, 400 MHz)

Sep13-2023-h400-cj-0913-J.10.fid

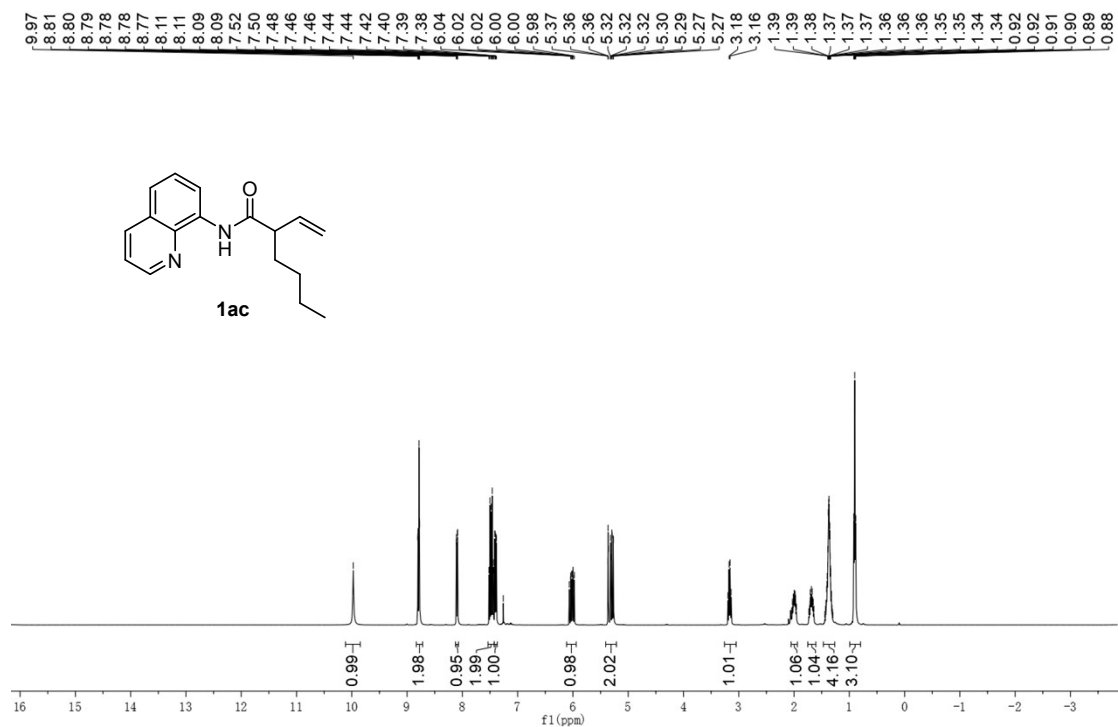

# <sup>13</sup>C NMR of 1ac (CDCl<sub>3</sub>, 101 MHz)

Sep13-2023-c400-cj-0913-J.11.fid

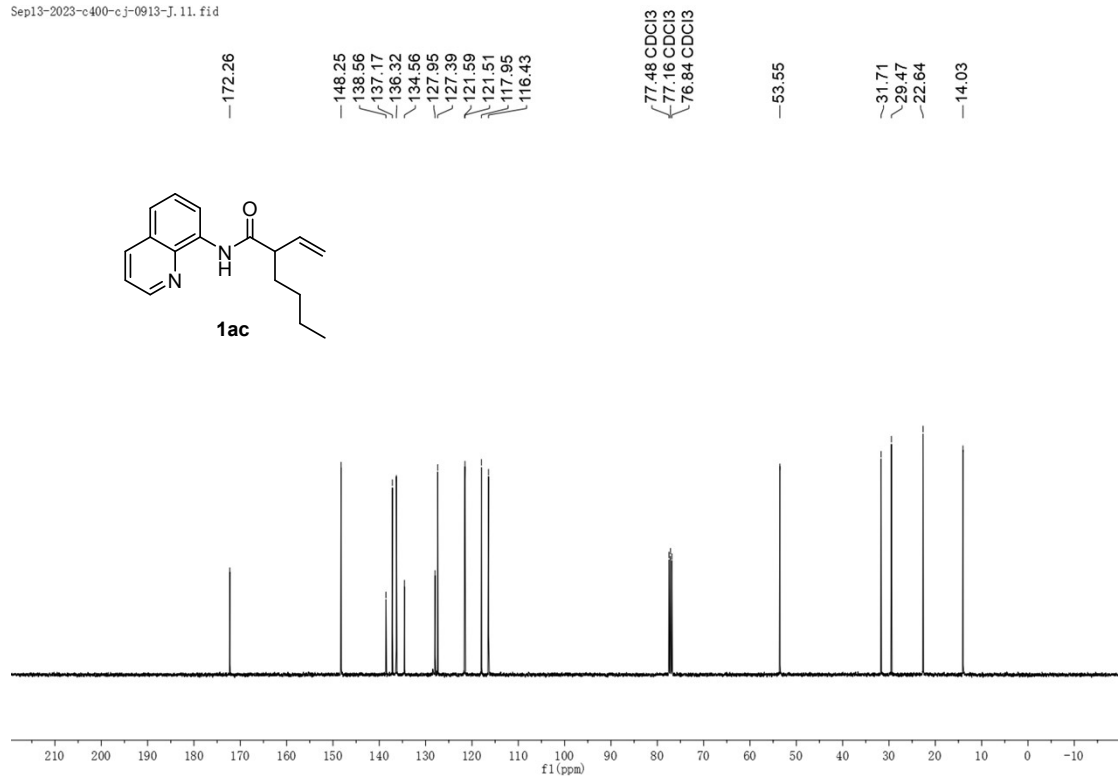



# <sup>1</sup>H NMR of 1ad (CDCl<sub>3</sub>, 400 MHz)

Jul24-2023-h400-cj-0724-13.10.fid

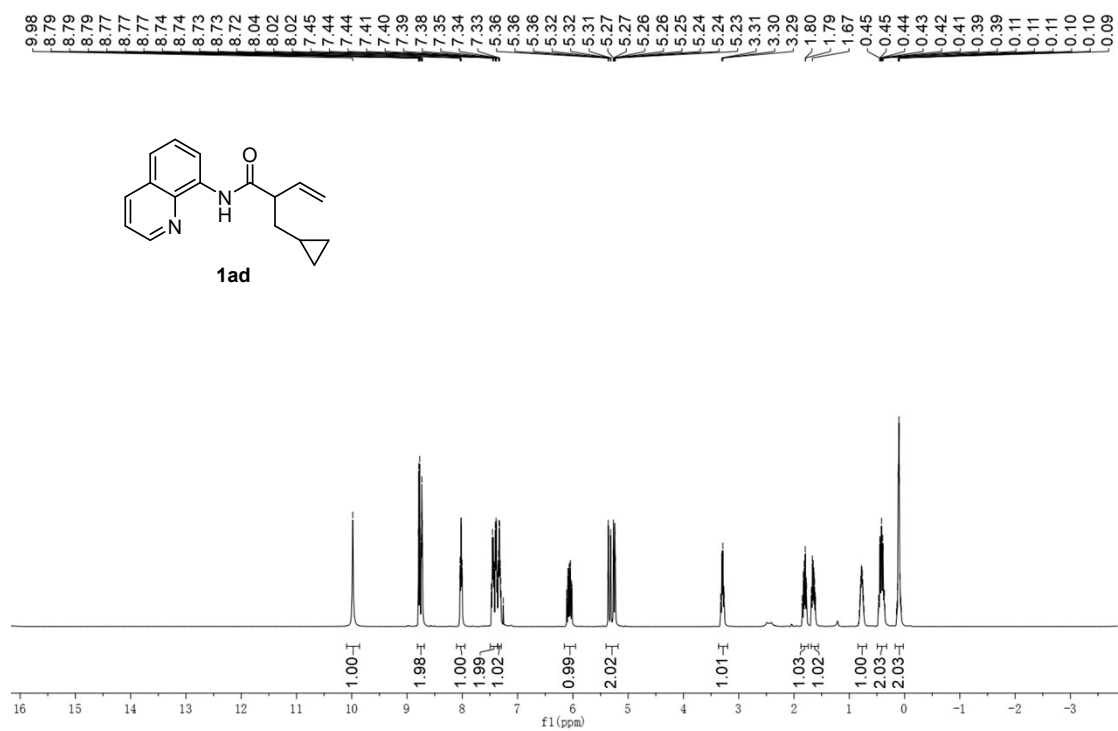

# <sup>13</sup>C NMR of 1ad (CDCl<sub>3</sub>, 101 MHz)

Jul25-2023-c400-cj-0724-13.10.fid

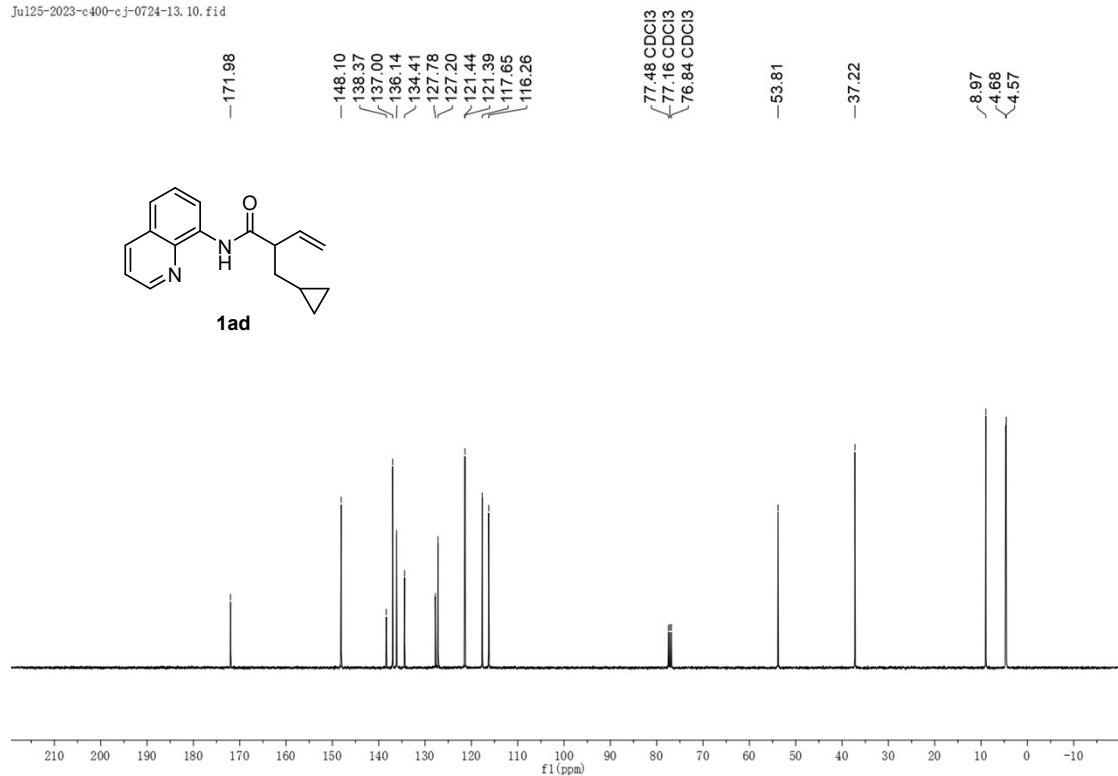

# <sup>1</sup>H NMR of 1ae (CDCl<sub>3</sub>, 400 MHz)

Jun27-2023-H400-cj-0627-14. 10. fid

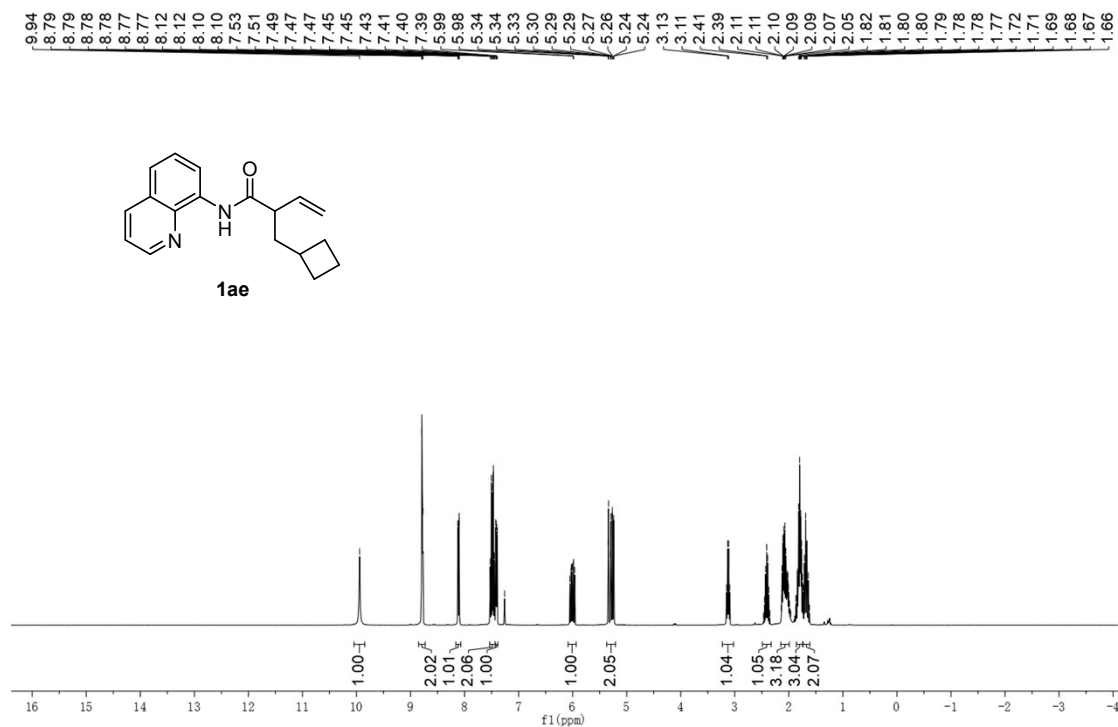

# <sup>13</sup>C NMR of 1ae (CDCl<sub>3</sub>, 101 MHz)

Jun27-2023-C400-cj-0627-14. 12. fid

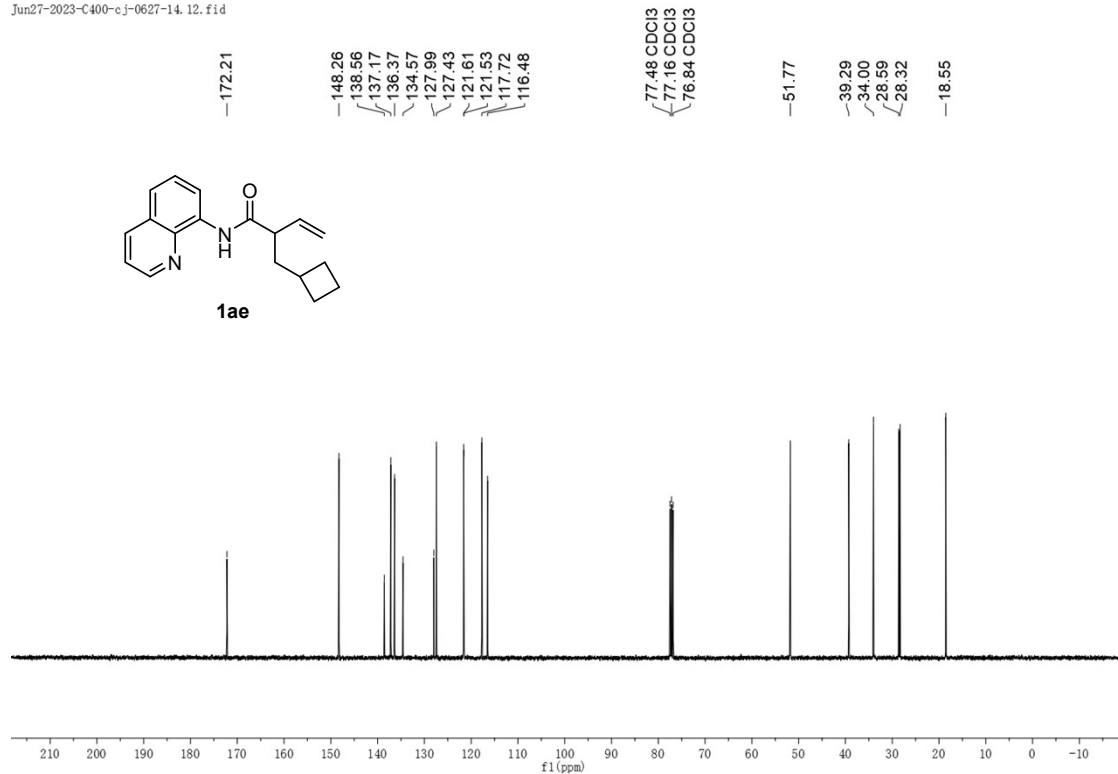

# <sup>1</sup>H NMR of 1af (CDCl<sub>3</sub>, 400 MHz)

Jun26-2023-h400-cj-0626-04.10.fid

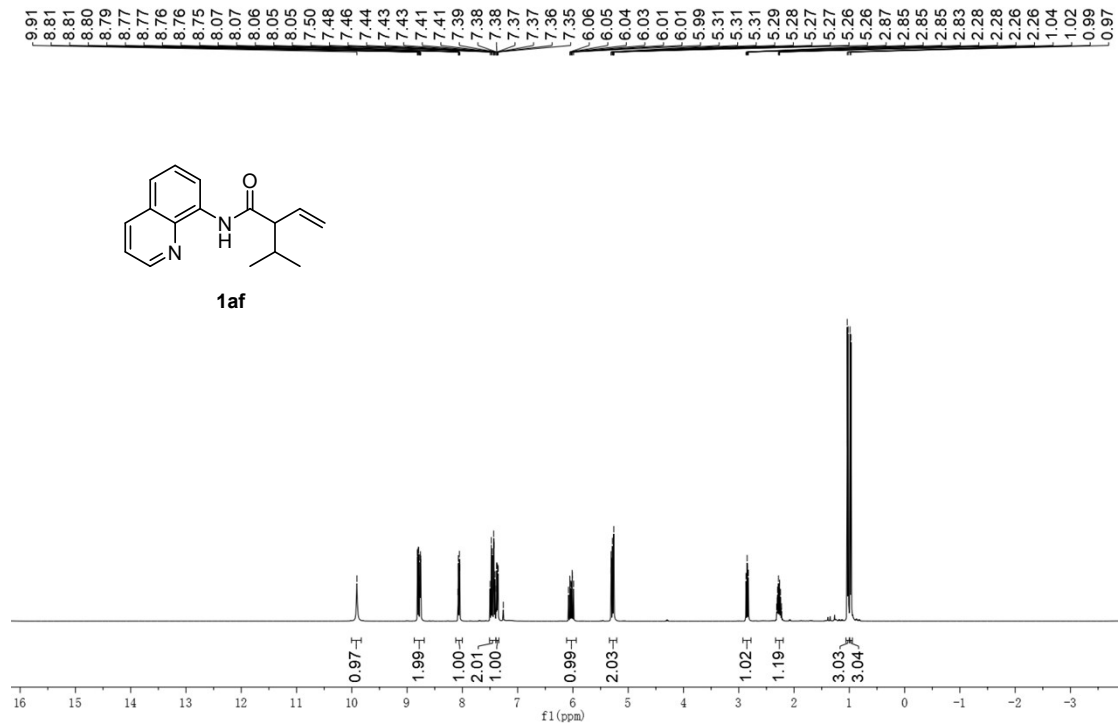

# <sup>13</sup>C NMR of 1af (CDCl<sub>3</sub>, 101 MHz)

Jun26-2023-c400-cj-0626-04.10.fid

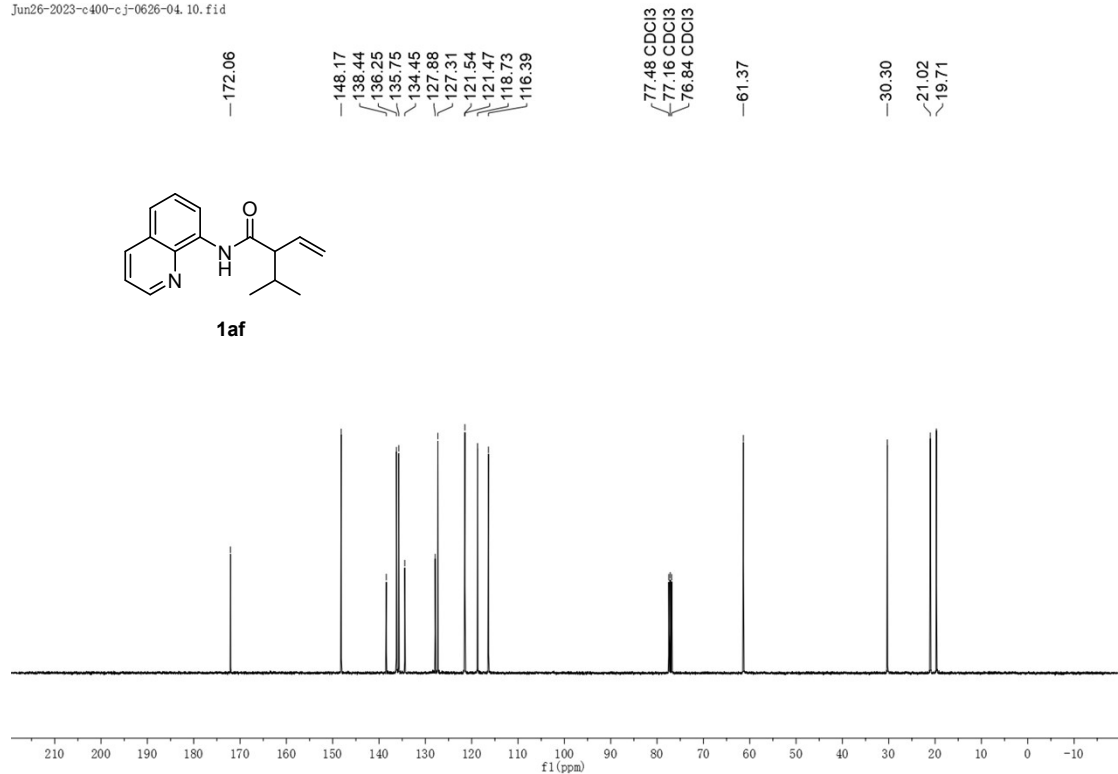

# <sup>1</sup>H NMR of 1ag (CDCl<sub>3</sub>, 400 MHz)

Sep06-2023-h400-cj-0906-wu.10.fid

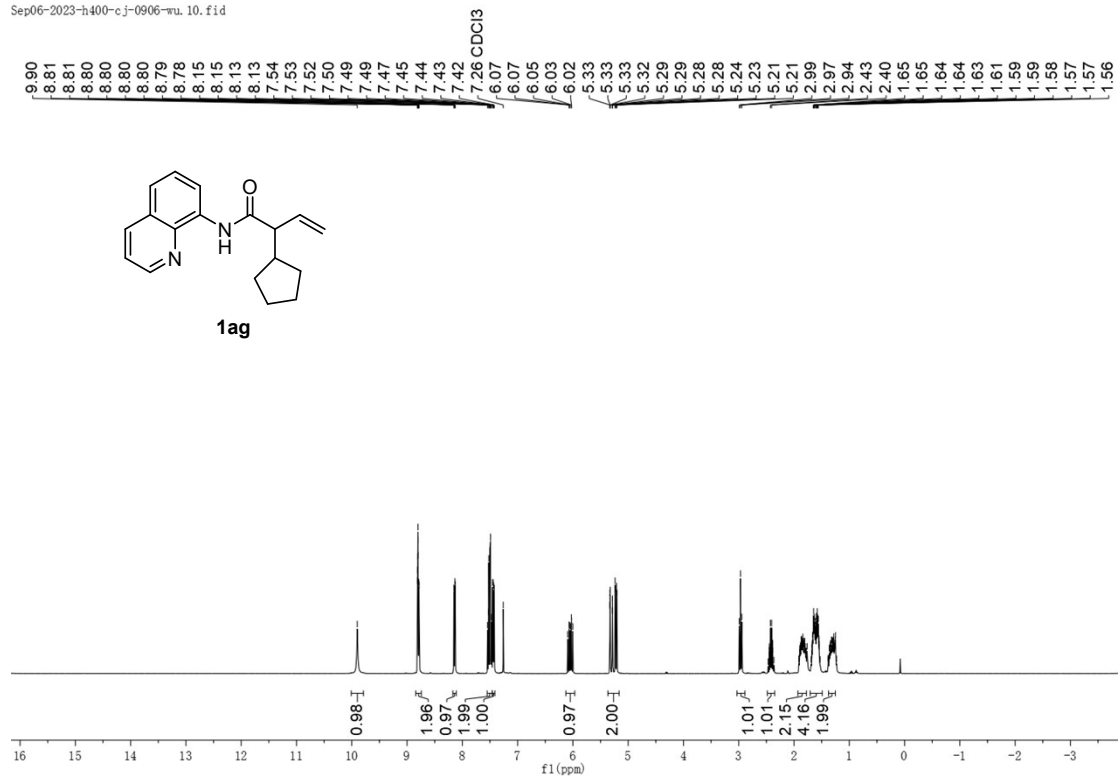

# <sup>13</sup>C NMR of 1ag (CDCl<sub>3</sub>, 101 MHz)

Sep06-2023-c400-cj-0906-wu.11.fid

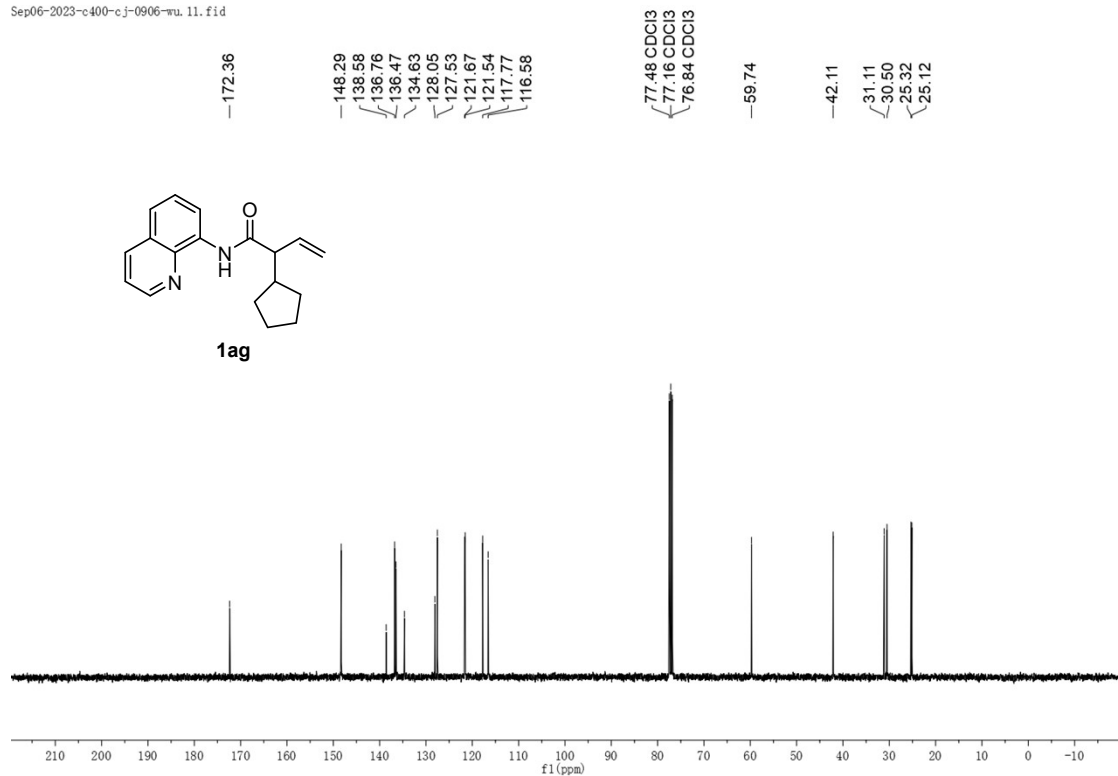

# $^1\text{H}$ NMR of 1ah ( $\text{CDCl}_3$ , 400 MHz)

Sep06-2023-h400-cj-0906-liu.10.fid

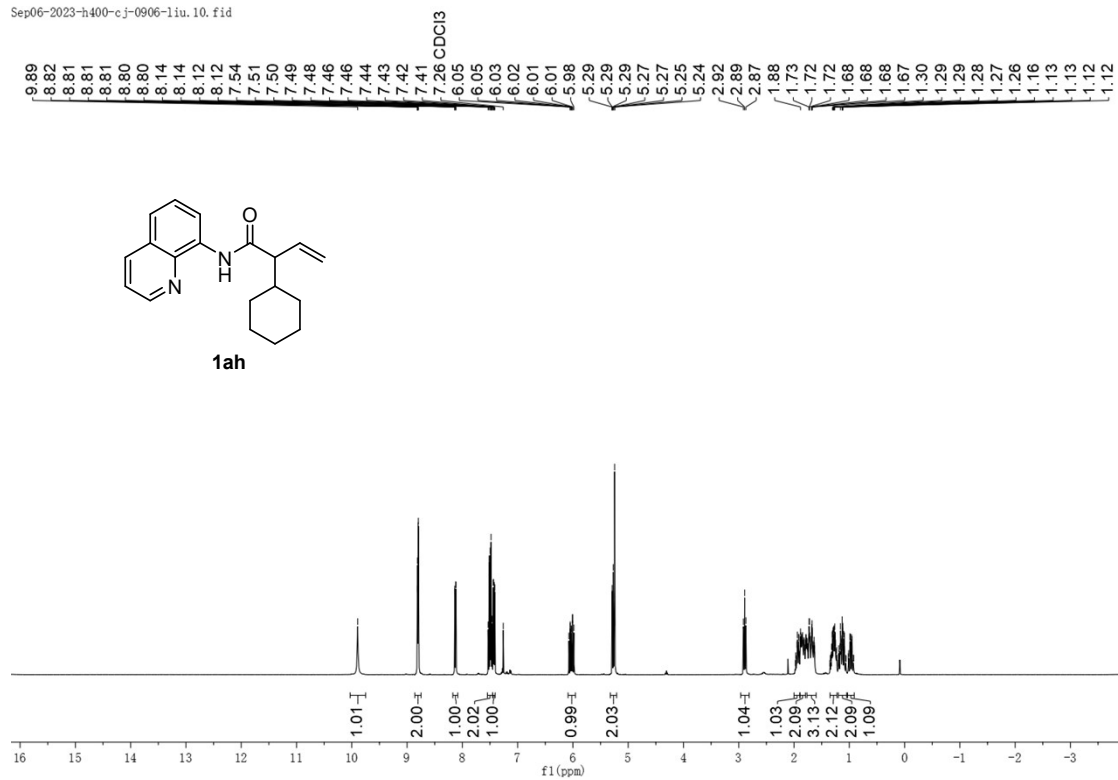

# $^{13}\text{C}$ NMR of 1ah ( $\text{CDCl}_3$ , 101 MHz)

Sep06-2023-c400-cj-0906-liu.11.fid

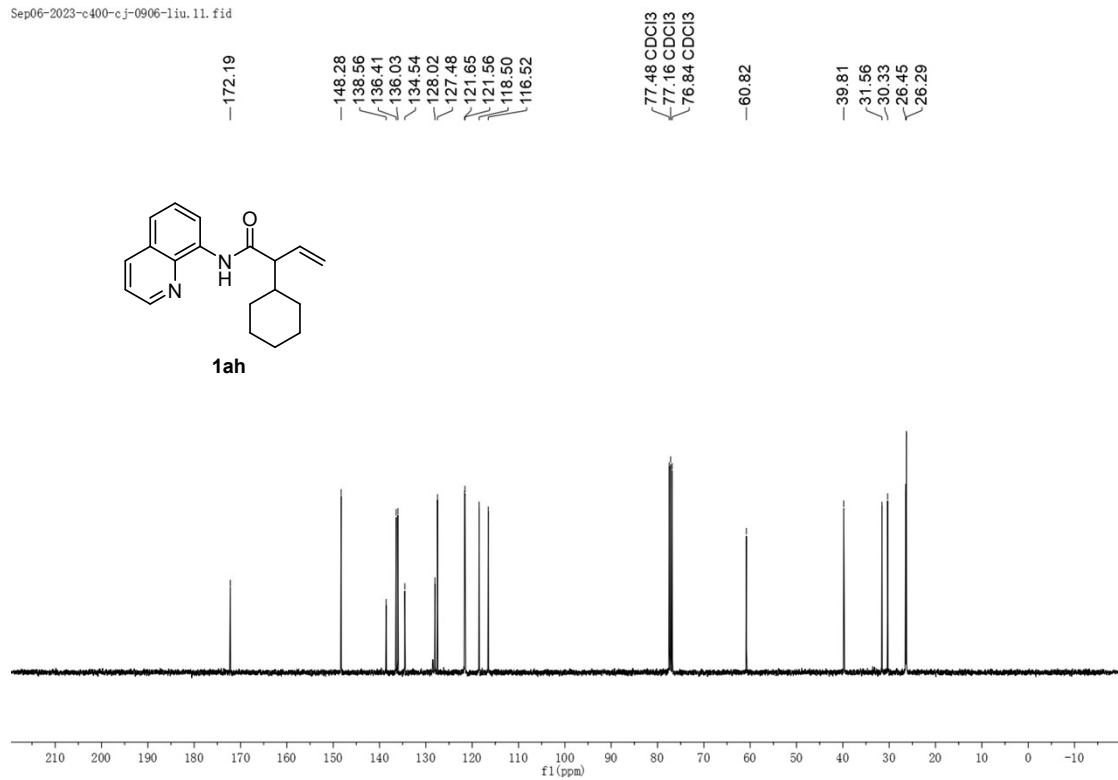

# <sup>1</sup>H NMR of 1ai (CDCl<sub>3</sub>, 400 MHz)

Jun27-2023-H400-cj-0627-16.10.fid

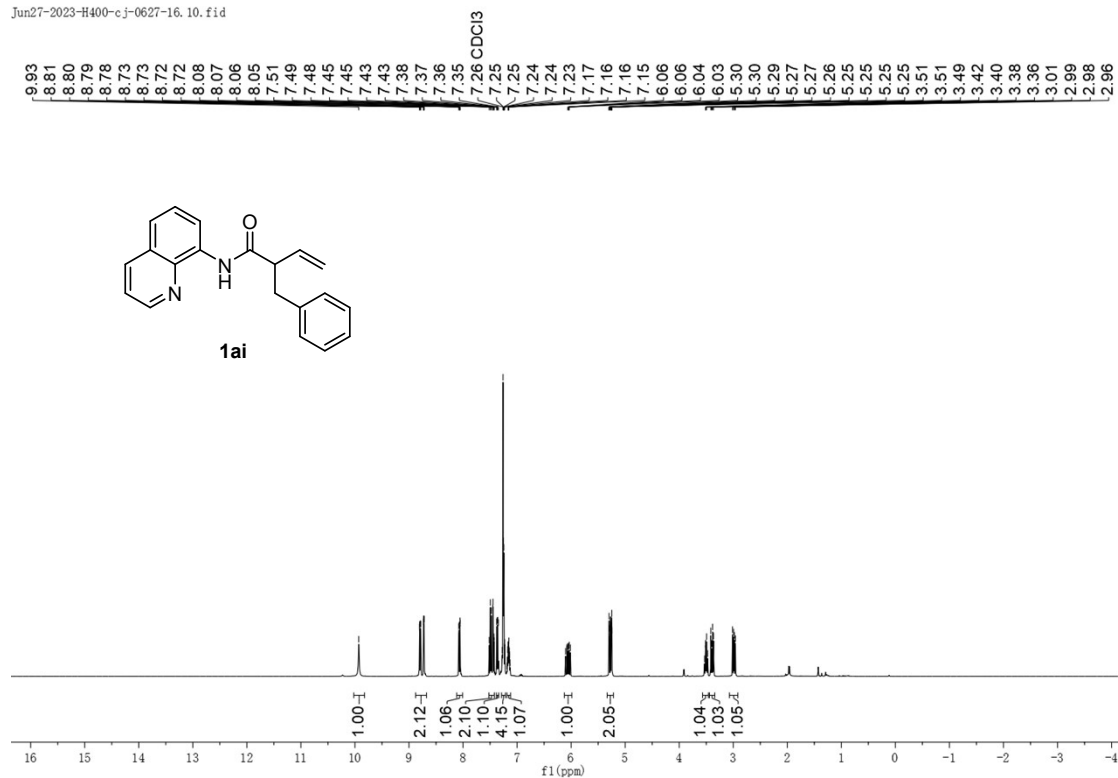

# <sup>13</sup>C NMR of 1ai (CDCl<sub>3</sub>, 101 MHz)

Jun27-2023-C400-cj-0627-16.12.fid

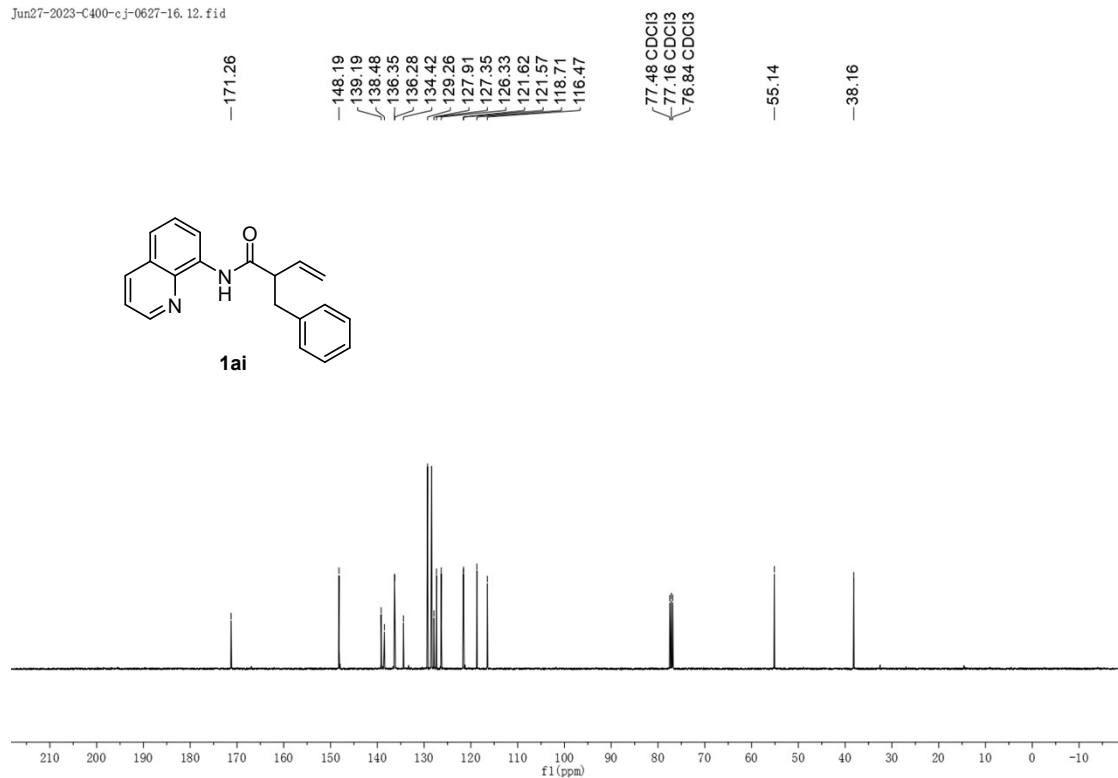

# <sup>1</sup>H NMR of 1aj (CDCl<sub>3</sub>, 400 MHz)

Ju104-2023-h400-cj-0704-17.10.fid

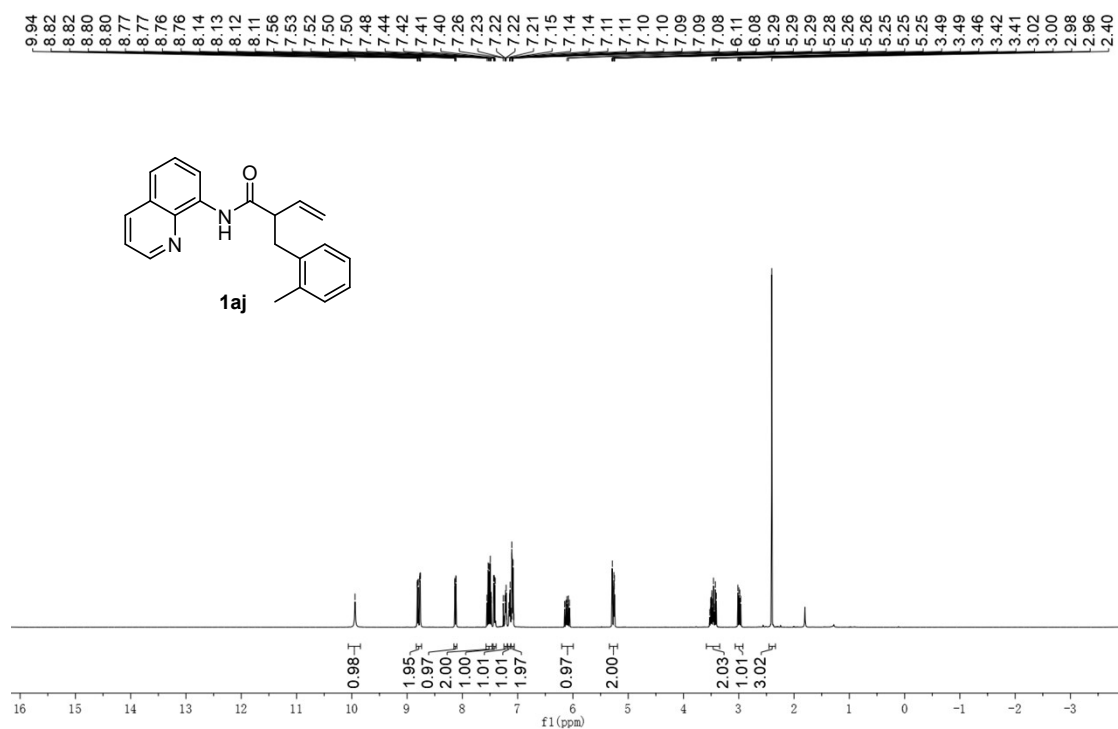

# <sup>13</sup>C NMR of 1aj (CDCl<sub>3</sub>, 101 MHz)

Ju106-2023-C400-cj-0704-17.10.fid

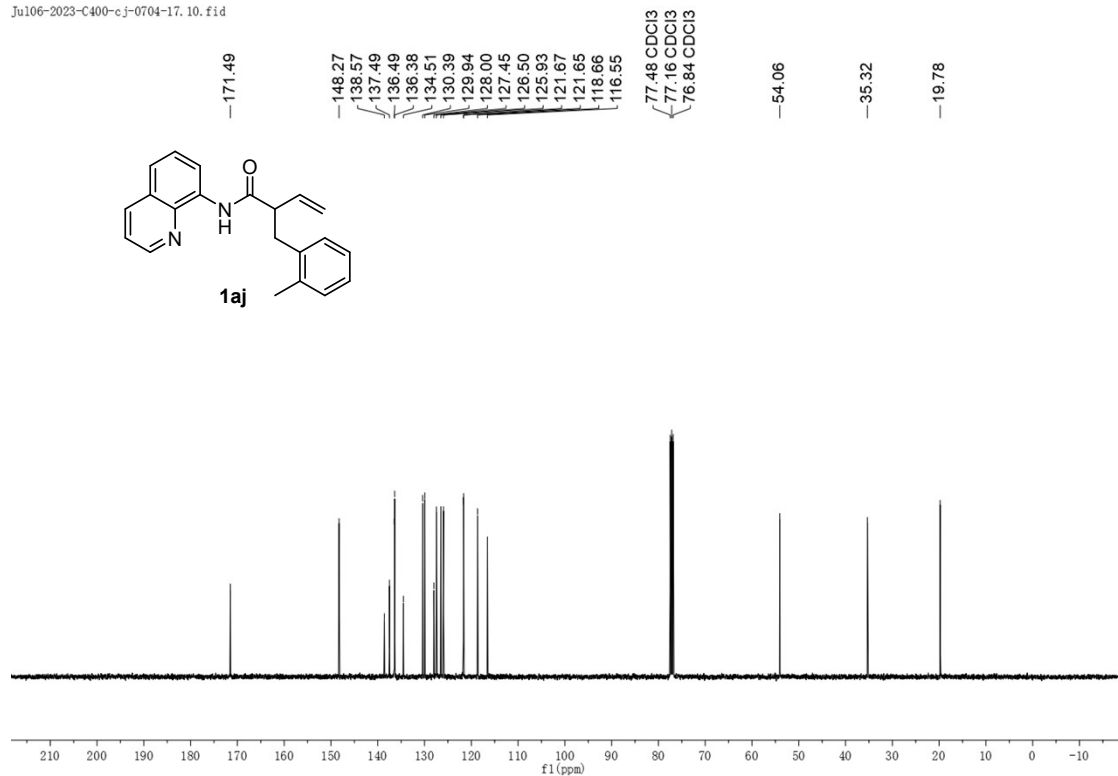

# <sup>1</sup>H NMR of 1ak (CDCl<sub>3</sub>, 400 MHz)

Jul17-2023-h400-cj-0717-18.10.fid

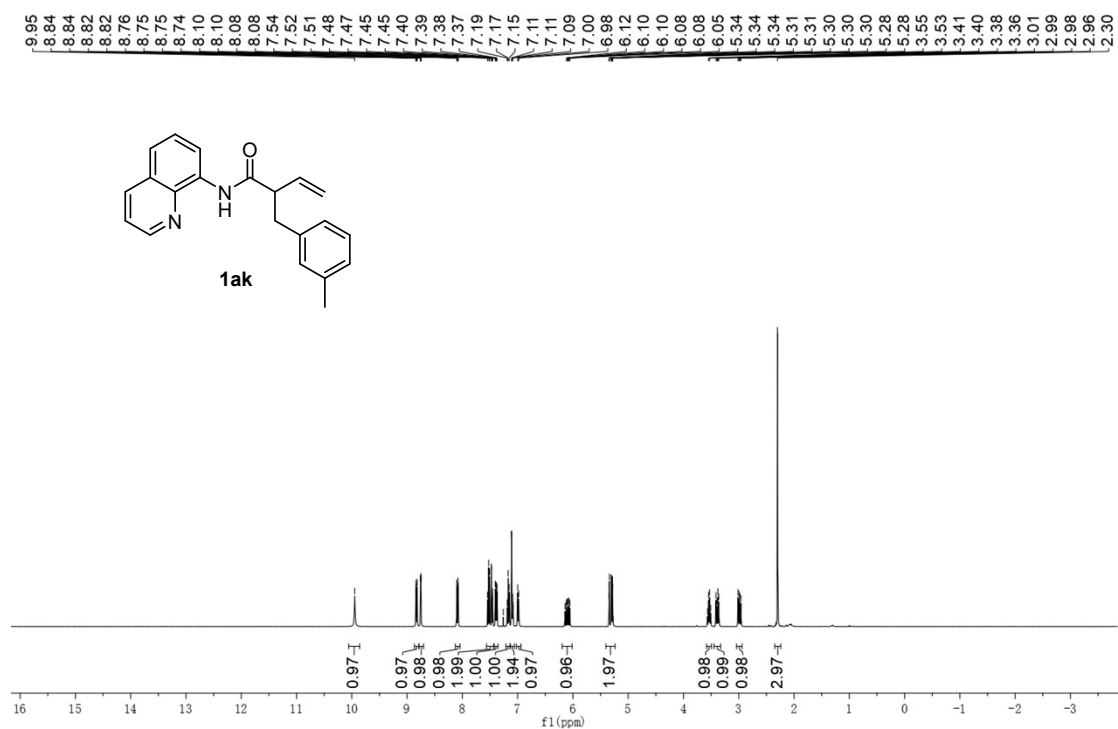

# <sup>13</sup>C NMR of 1ak (CDCl<sub>3</sub>, 101 MHz)

Jul17-2023-c400-cj-0717-18.11.fid

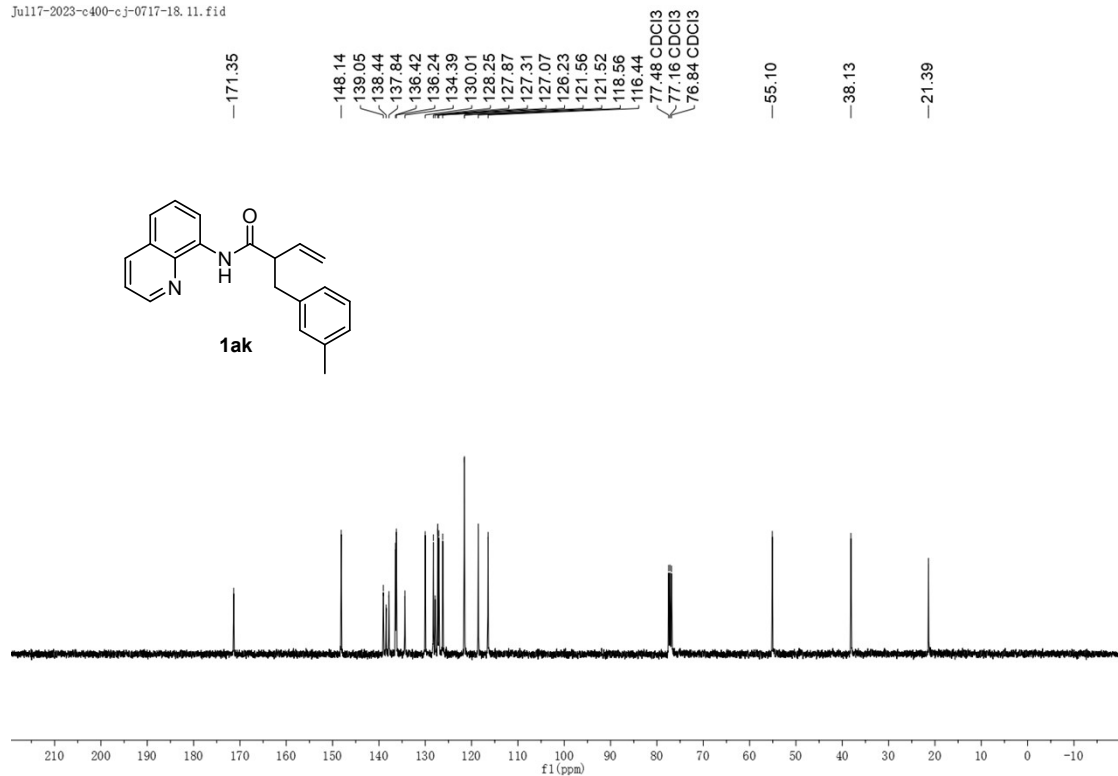



# <sup>1</sup>H NMR of 1aI (CDCl<sub>3</sub>, 400 MHz)

Jul18-2023-h400-cj-0718-19.10.fid

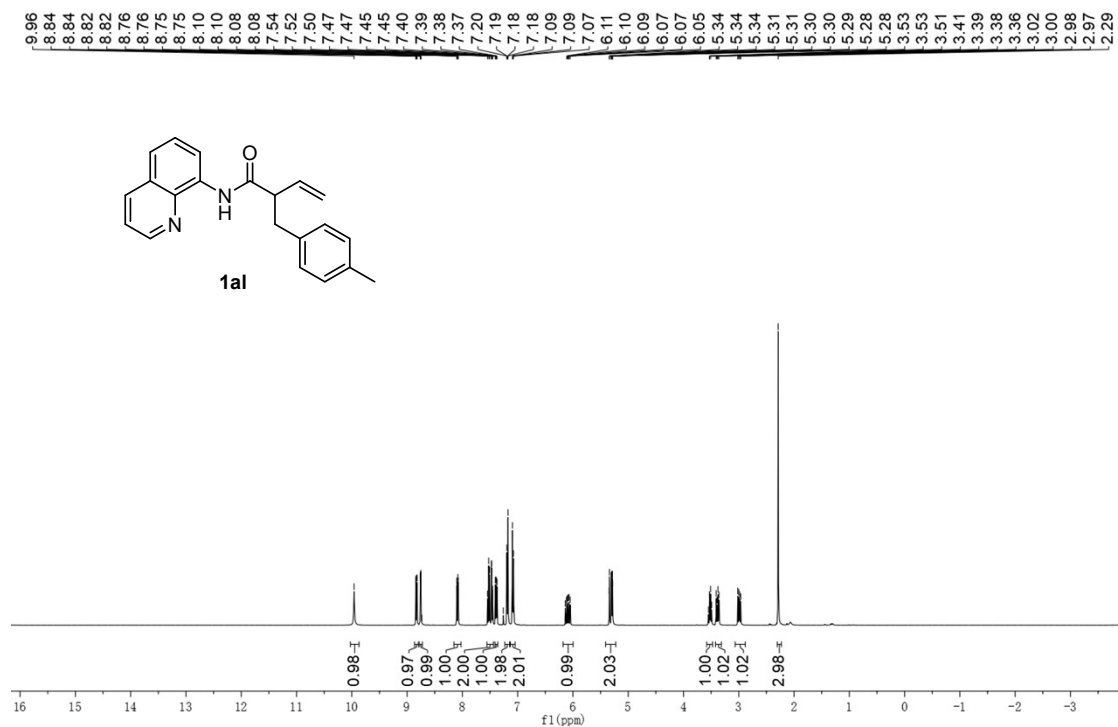

# <sup>13</sup>C NMR of 1aI (CDCl<sub>3</sub>, 101 MHz)

Jul18-2023-c400-cj-0718-19.11.fid

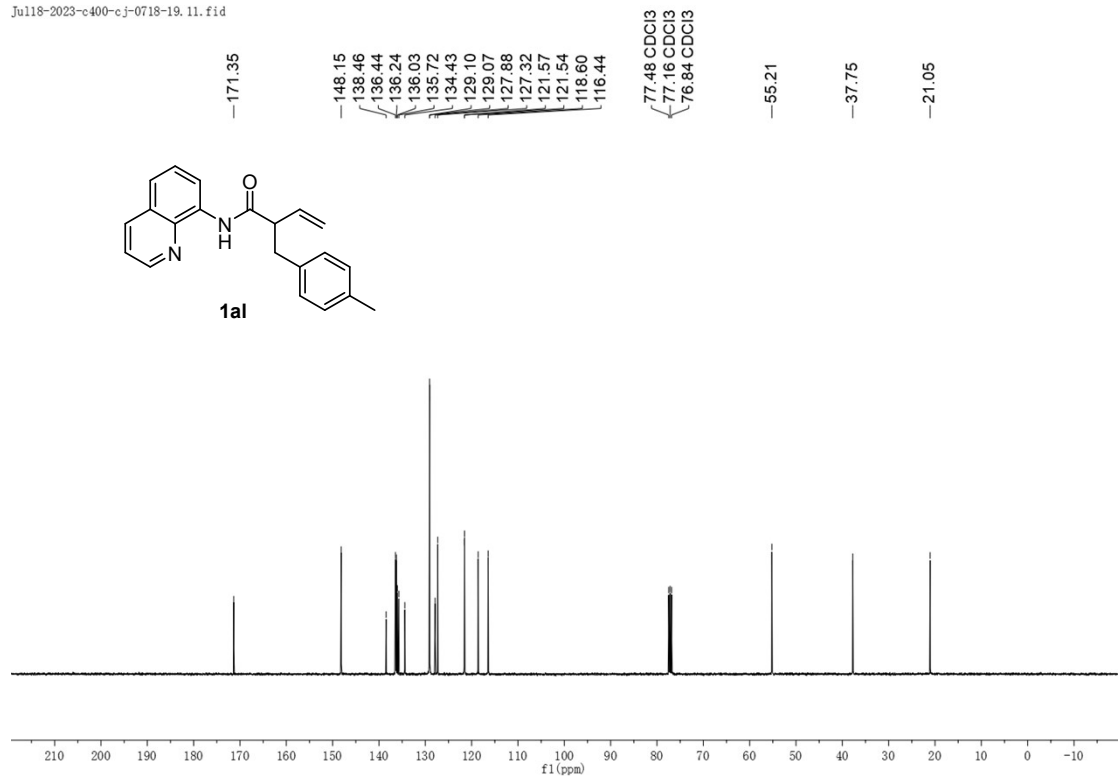

# <sup>1</sup>H NMR of 1am (CDCl<sub>3</sub>, 400 MHz)

Jul12-2023-H400-cj-0712-24. 10. fid

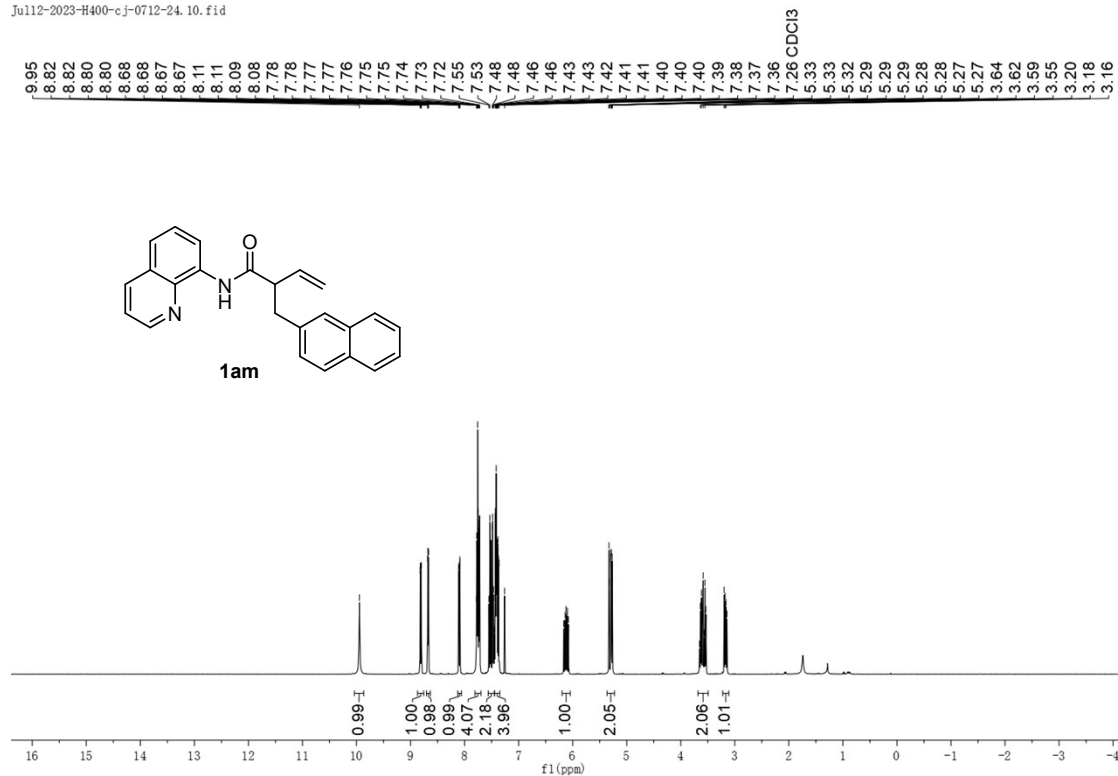

# <sup>13</sup>C NMR of 1am (CDCl<sub>3</sub>, 101 MHz)

Jul12-2023-C400-cj-0712-24. 11. fid

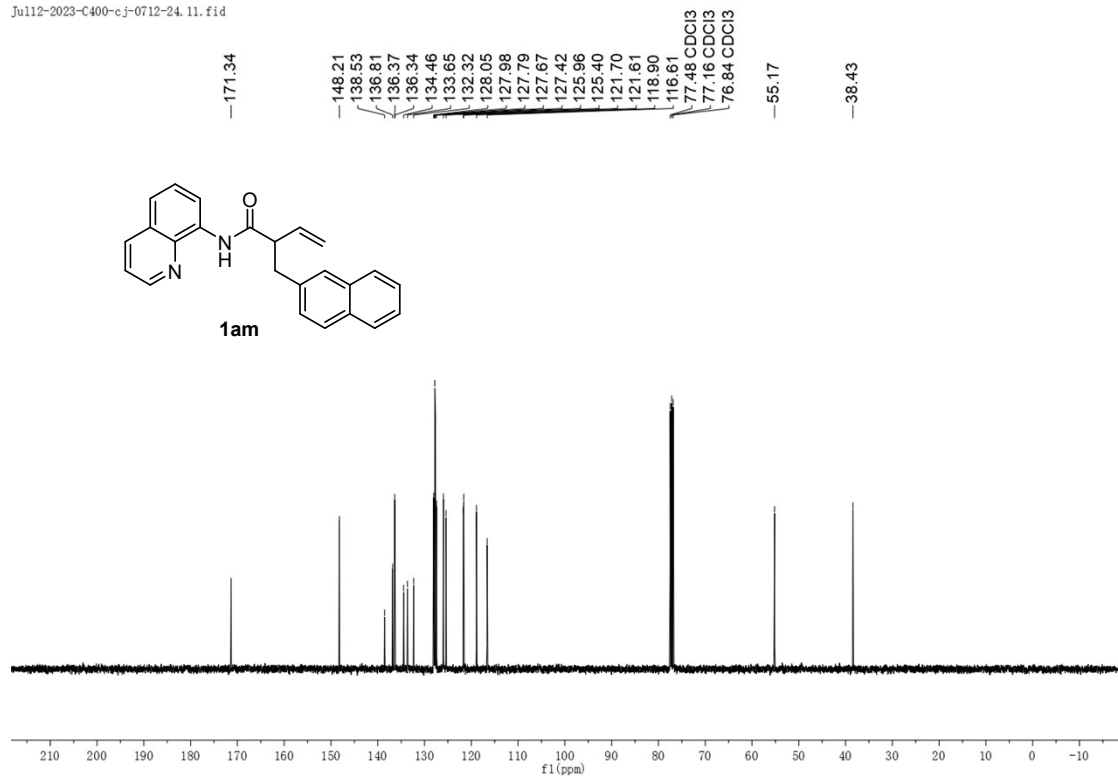

# <sup>1</sup>H NMR of 1an (CDCl<sub>3</sub>, 400 MHz)

Ju105-2023-H400-cj-0705-20.10.fid

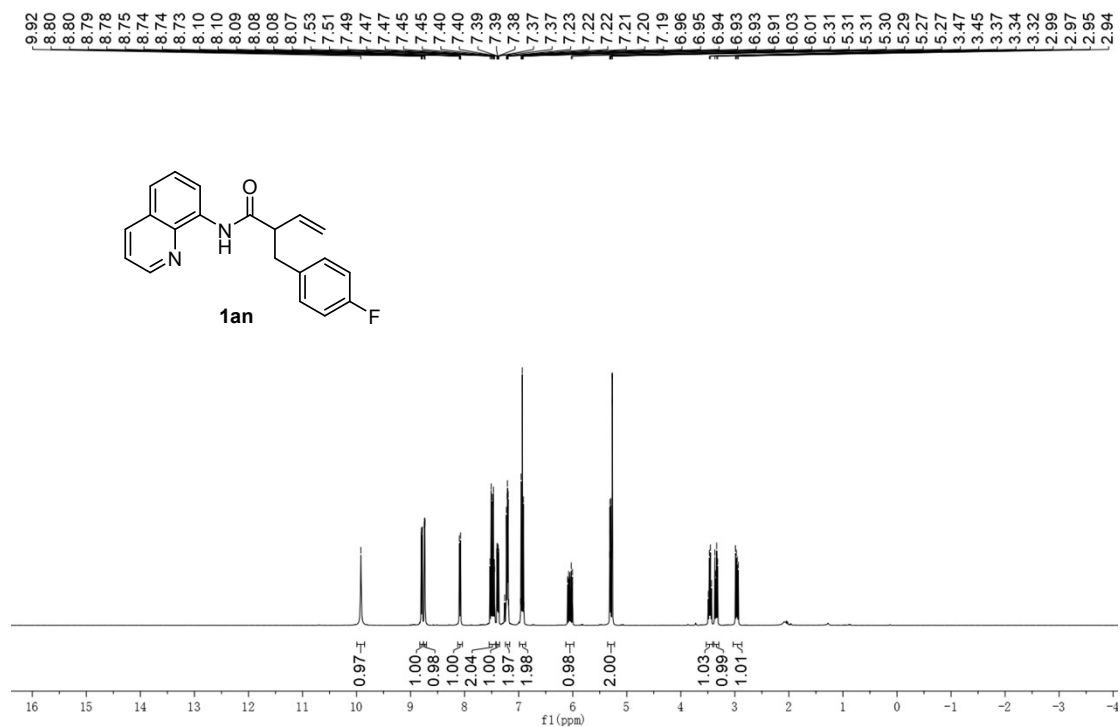

# <sup>13</sup>C NMR of 1an (CDCl<sub>3</sub>, 101 MHz)

Ju105-2023-C400-cj-0705-20.11.fid

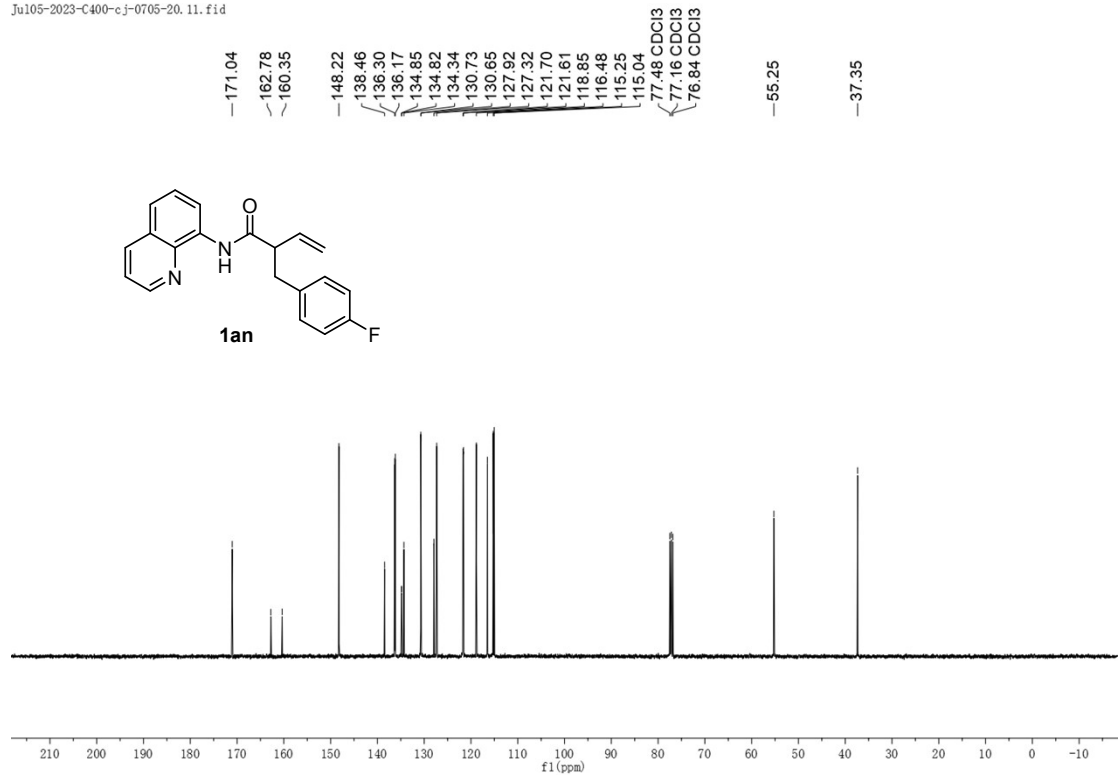

**$^{19}\text{F}$  NMR of 1an ( $\text{CDCl}_3$ , 376 MHz)**

Nov21-2023-f400-cj-1120-20.10.fid

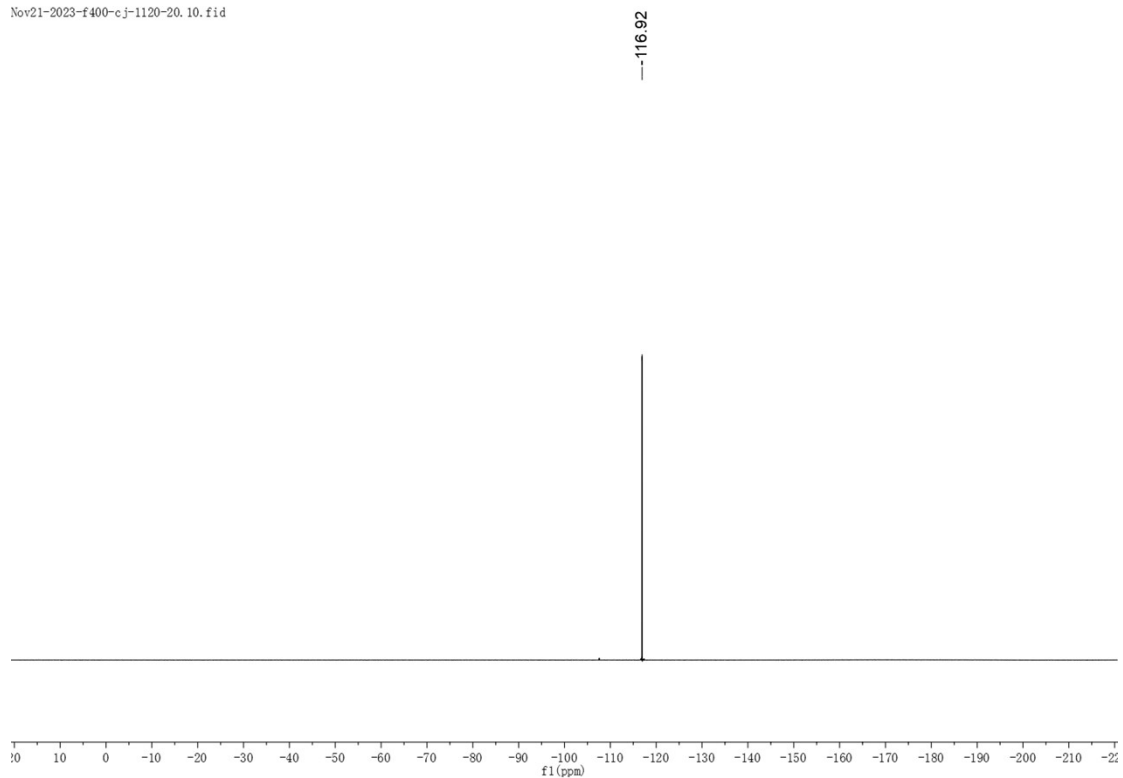

# <sup>1</sup>H NMR of 1ao (CDCl<sub>3</sub>, 400 MHz)

Jul11-2023-h400-cj-0711-21.10.fid

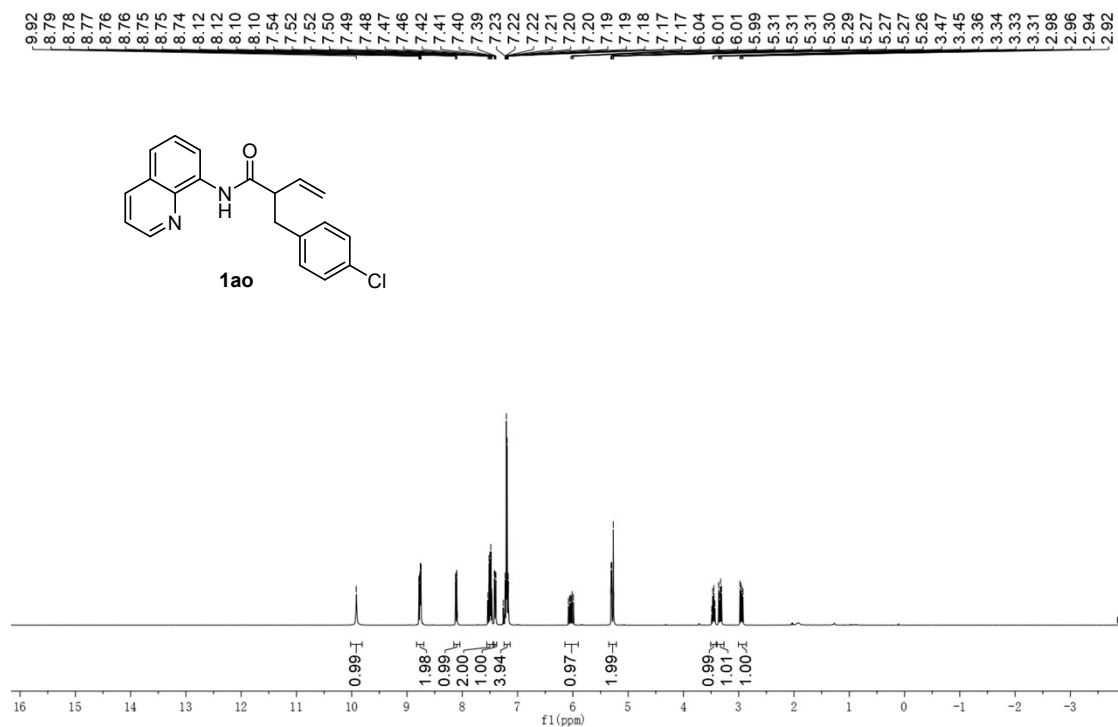

# <sup>13</sup>C NMR of 1ao (CDCl<sub>3</sub>, 101 MHz)

Jul11-2023-c400-cj-0711-21.11.fid

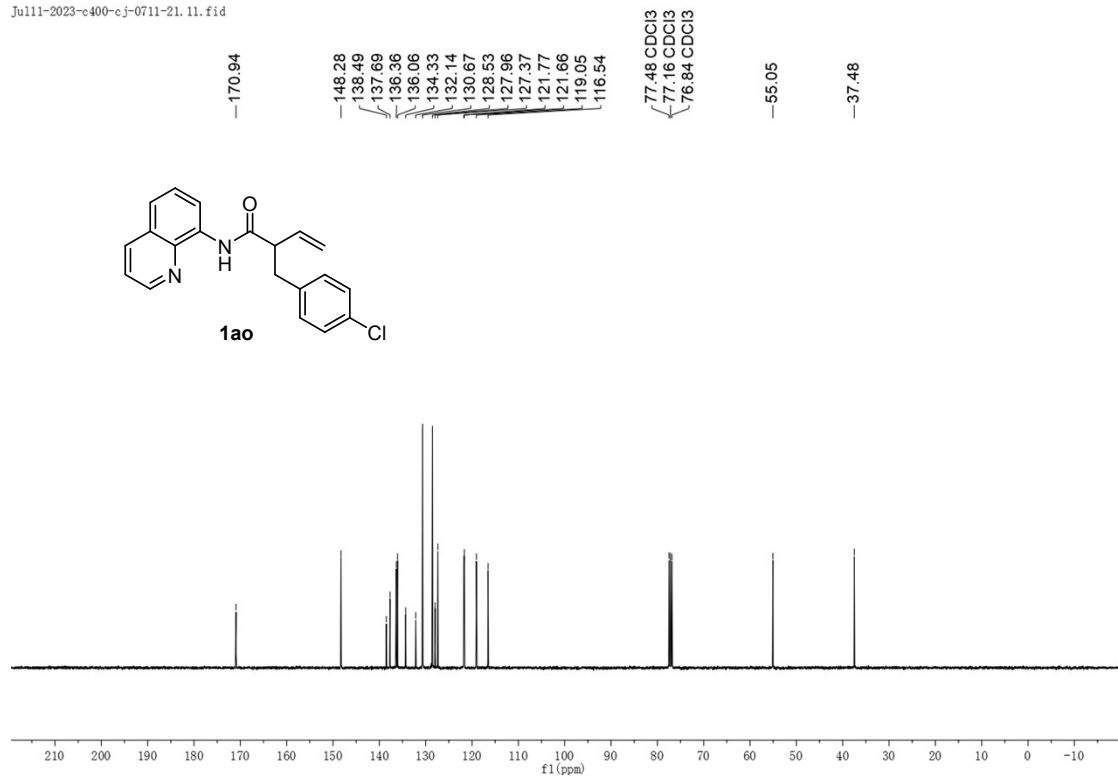

# <sup>1</sup>H NMR of 1ap (CDCl<sub>3</sub>, 400 MHz)

Jul13-2023-H400-cj-0713-22.10.fid

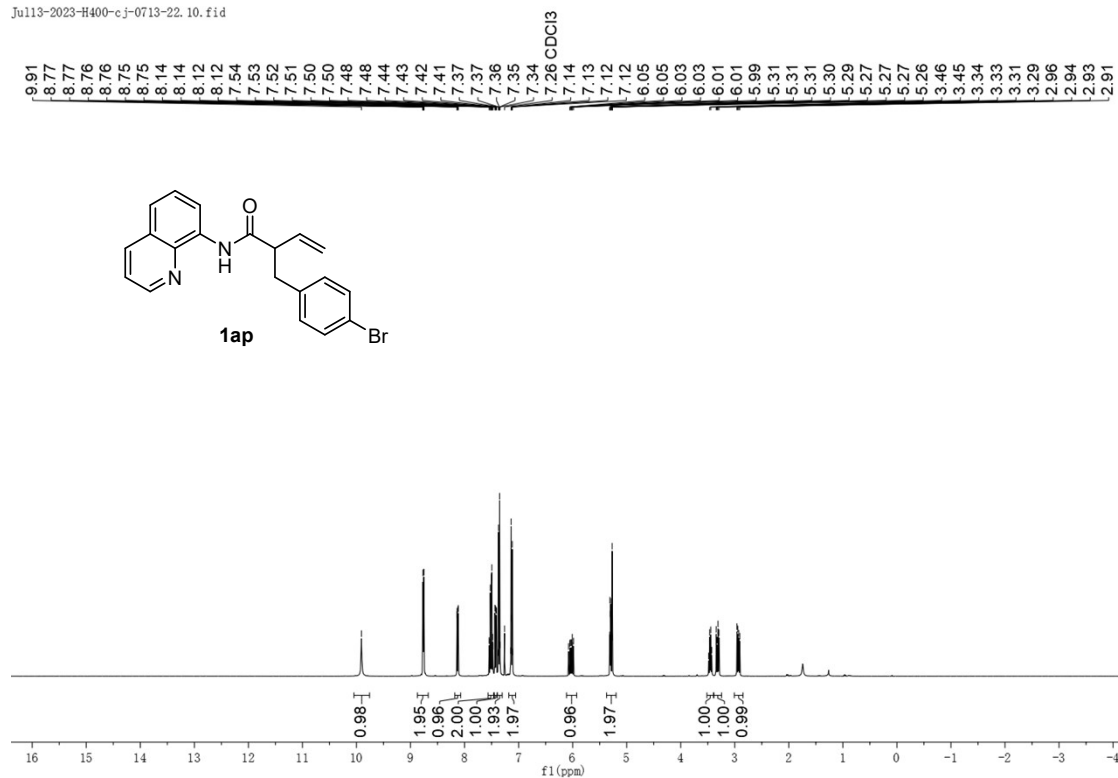

# <sup>13</sup>C NMR of 1ap (CDCl<sub>3</sub>, 101 MHz)

Jul13-2023-C400-cj-0713-22.11.fid

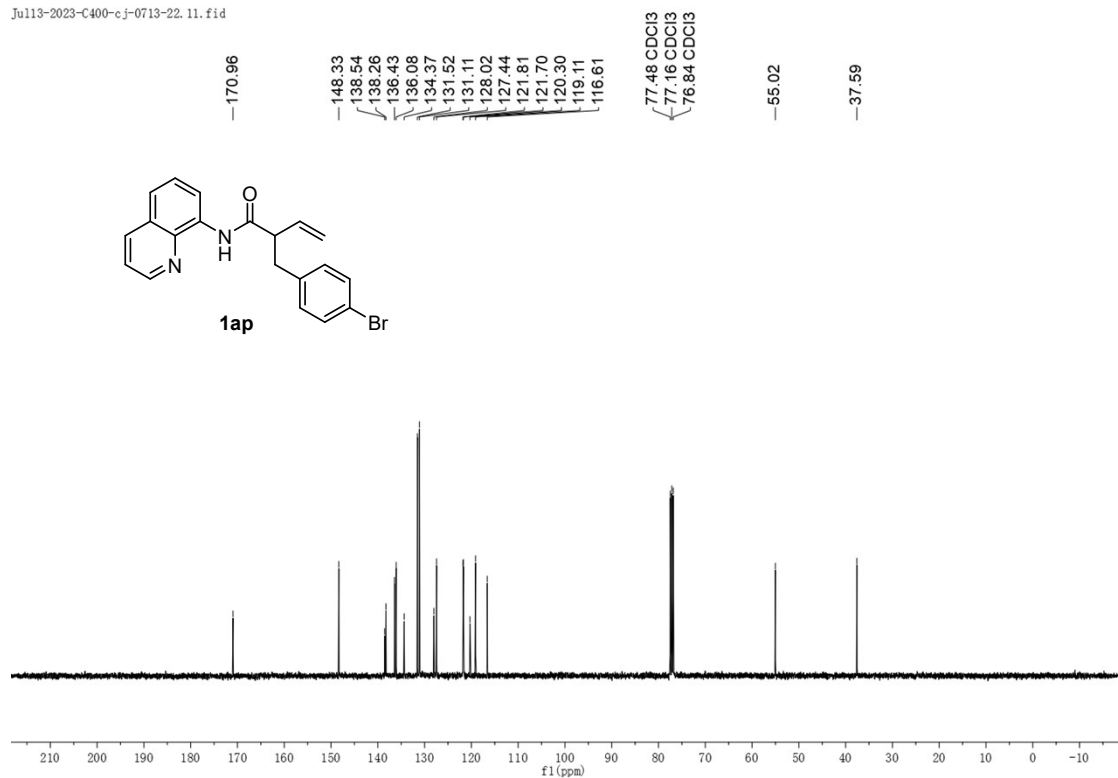

# <sup>1</sup>H NMR of 1aq (CDCl<sub>3</sub>, 400 MHz)

Jun30-2023-h400-cj-0630-07.10.fid

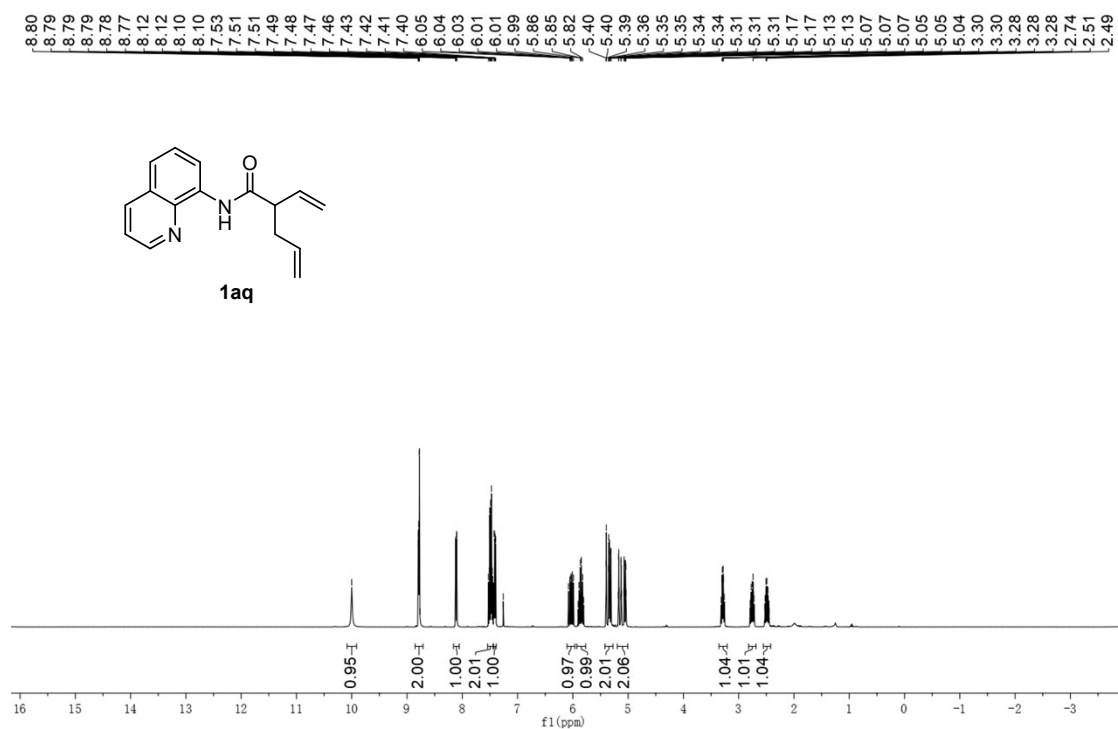

# <sup>13</sup>C NMR of 1aq (CDCl<sub>3</sub>, 101 MHz)

Ju103-2023-c400-cj-0630-07.10.fid

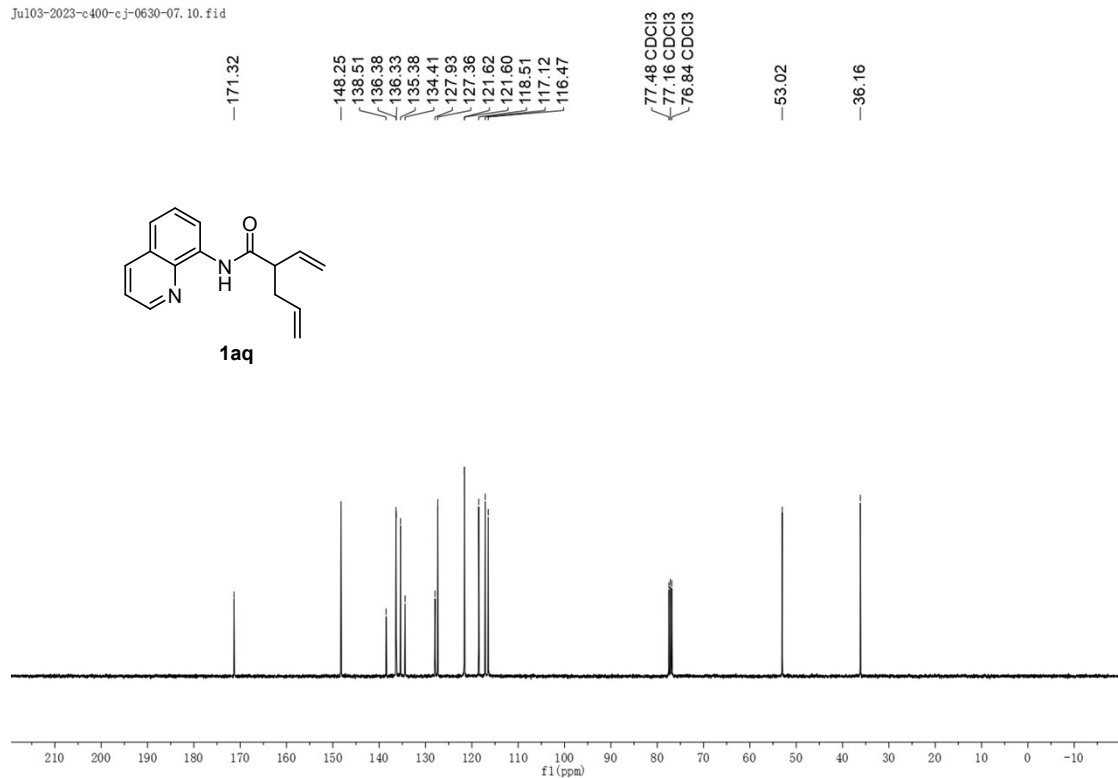

# <sup>1</sup>H NMR of 1ar (CDCl<sub>3</sub>, 400 MHz)

Jul11-2023-h400-cj-0711-08.10.fid

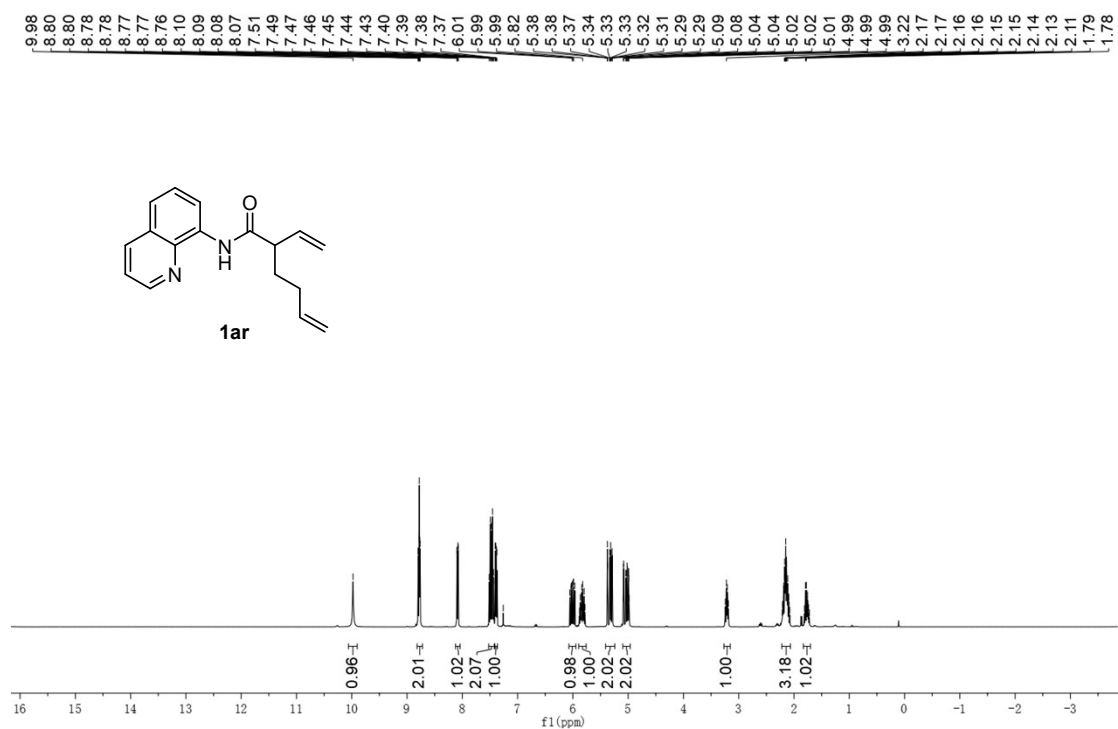

# <sup>13</sup>C NMR of 1ar (CDCl<sub>3</sub>, 101 MHz)

Jul11-2023-c400-cj-0711-08.11.fid

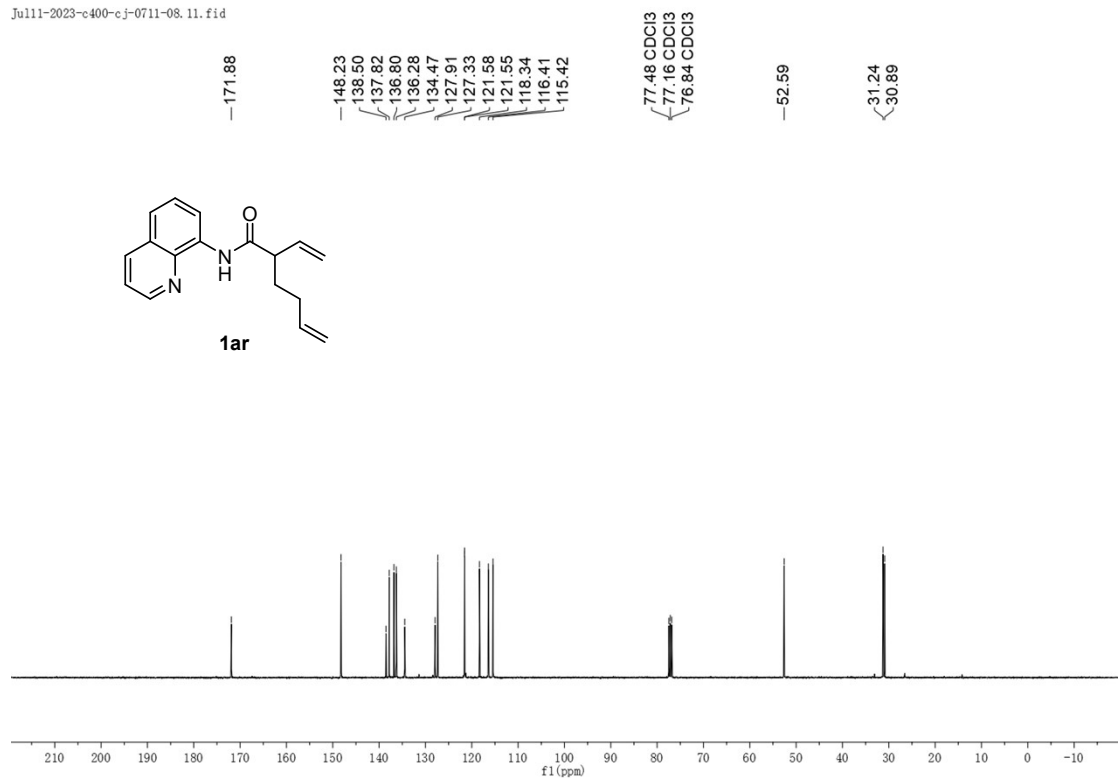



# <sup>1</sup>H NMR of 1as (CDCl<sub>3</sub>, 400 MHz)

Jul28-2023-h400-cj-0728-09.10.fid

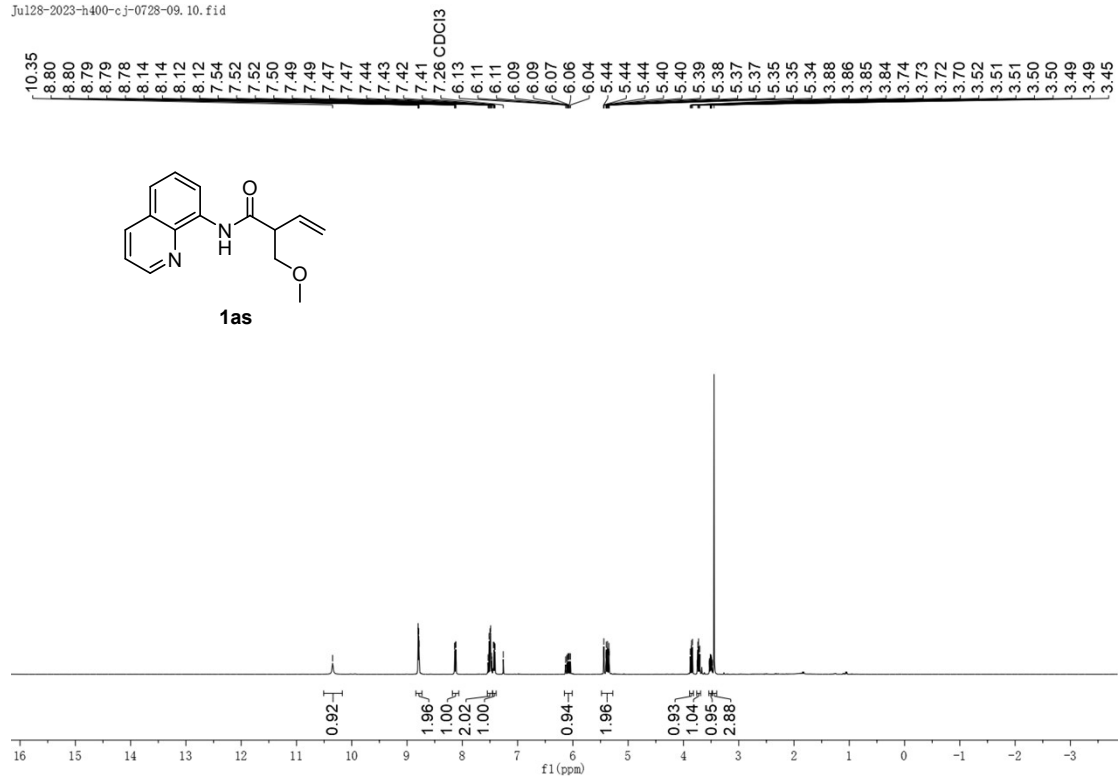

# <sup>13</sup>C NMR of 1as (CDCl<sub>3</sub>, 101 MHz)

Jul28-2023-c400-cj-0728-09.11.fid

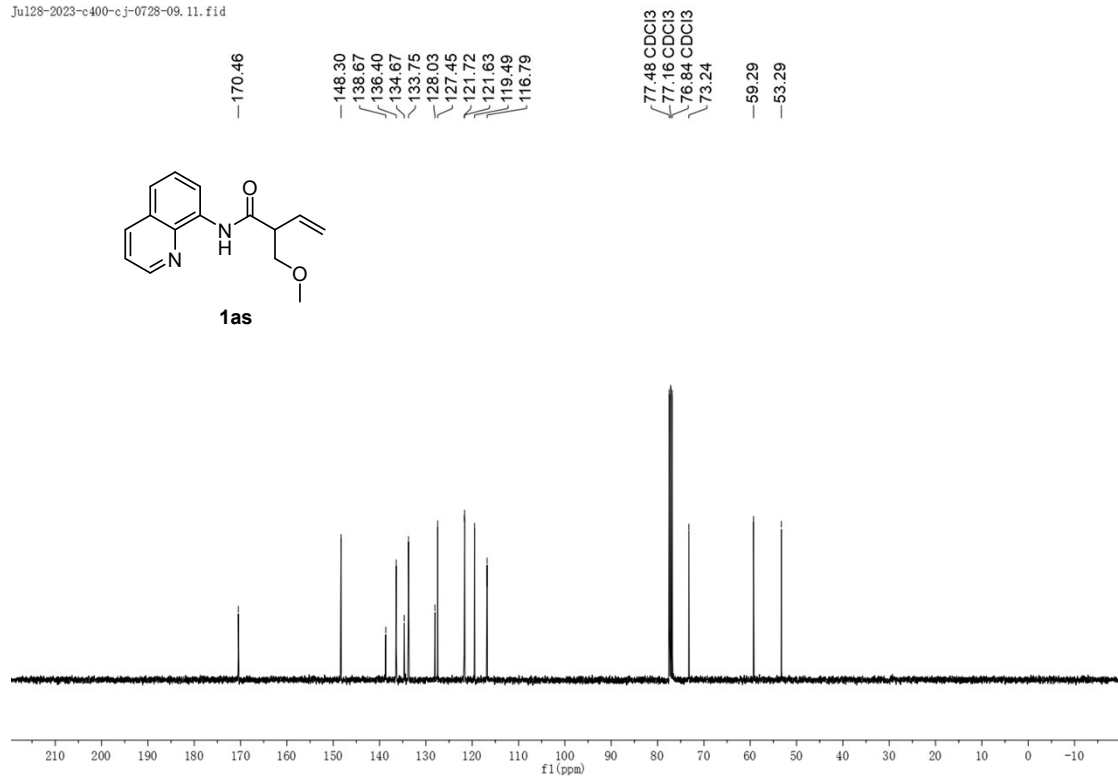

# <sup>1</sup>H NMR of 1at (CDCl<sub>3</sub>, 400 MHz)

Jul31-2023-h400-cj-0731-10.10.fid

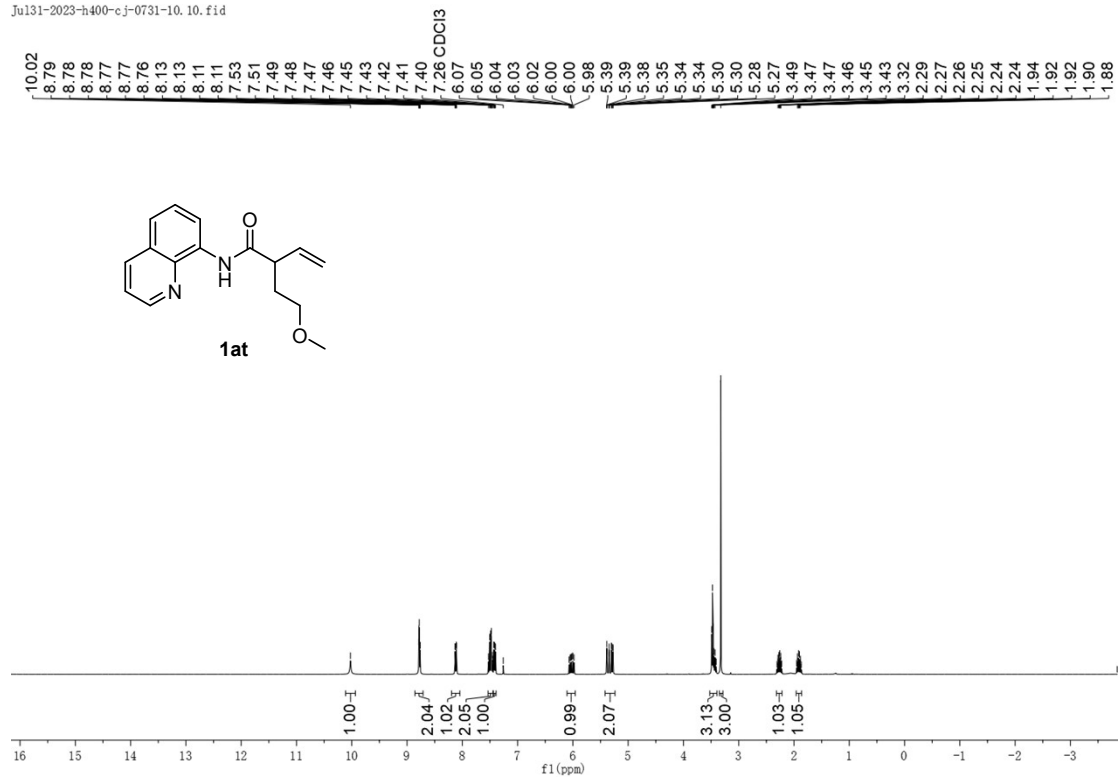

# <sup>13</sup>C NMR of 1at (CDCl<sub>3</sub>, 101 MHz)

Jul31-2023-c400-cj-0731-10.11.fid

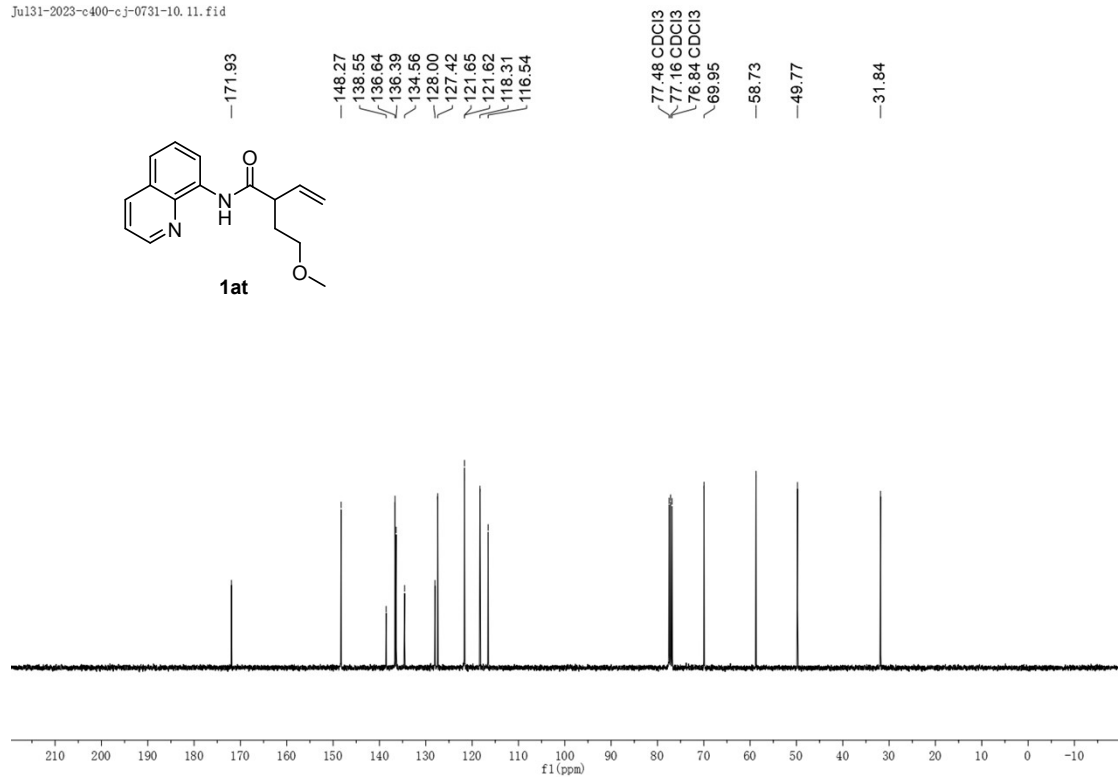

# <sup>1</sup>H NMR of 1au (CDCl<sub>3</sub>, 400 MHz)

Jul19-2023-H400-cj-0719-06.10.fid

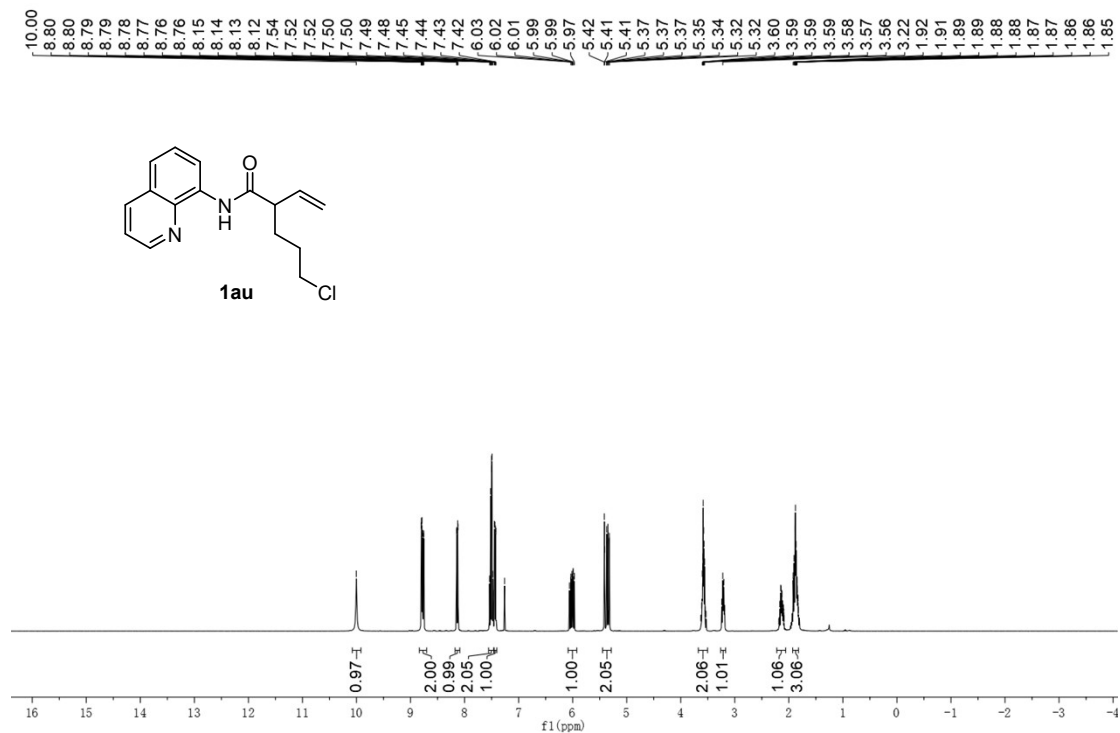

# <sup>13</sup>C NMR of 1au (CDCl<sub>3</sub>, 101 MHz)

Jul19-2023-C400-cj-0719-06.11.fid

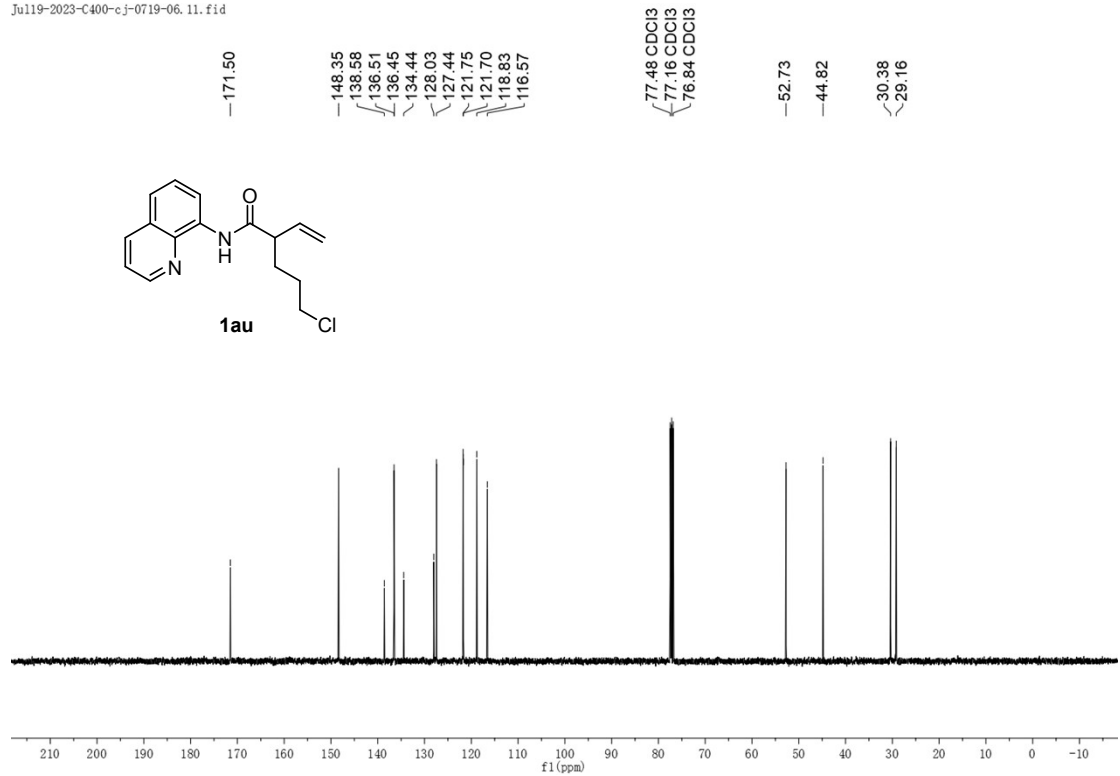

# <sup>1</sup>H NMR of 1av (CDCl<sub>3</sub>, 400 MHz)

Jul14-2023-h400-cj-0714-25.10.fid

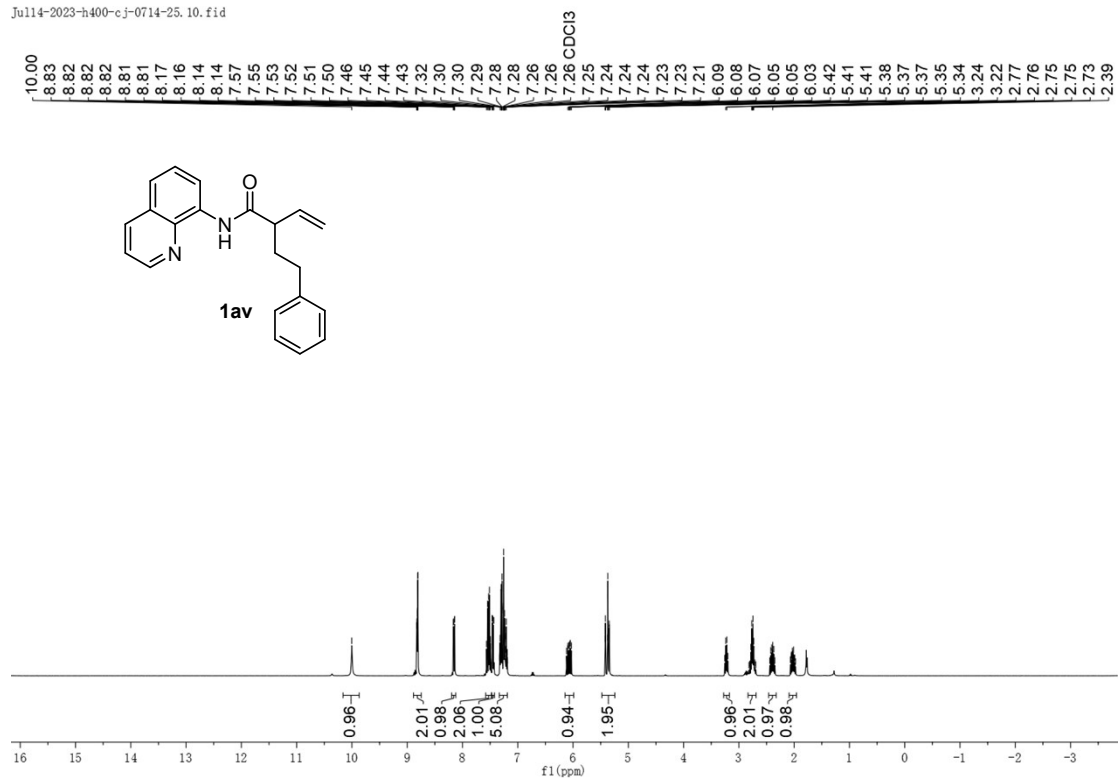

# <sup>13</sup>C NMR of 1av (CDCl<sub>3</sub>, 101 MHz)

Jul14-2023-c400-cj-0714-25.11.fid

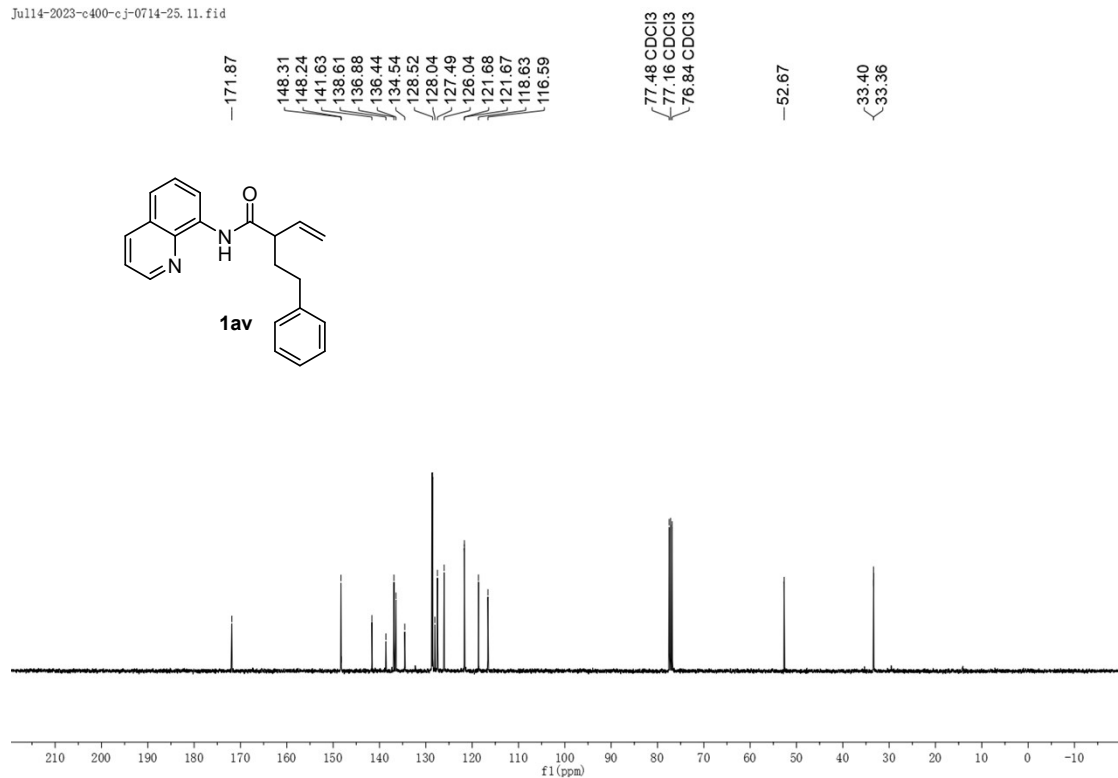

# <sup>1</sup>H NMR of 1aw (CDCl<sub>3</sub>, 400 MHz)

Aug01-2023-h400-cj-0801-71.10.fid

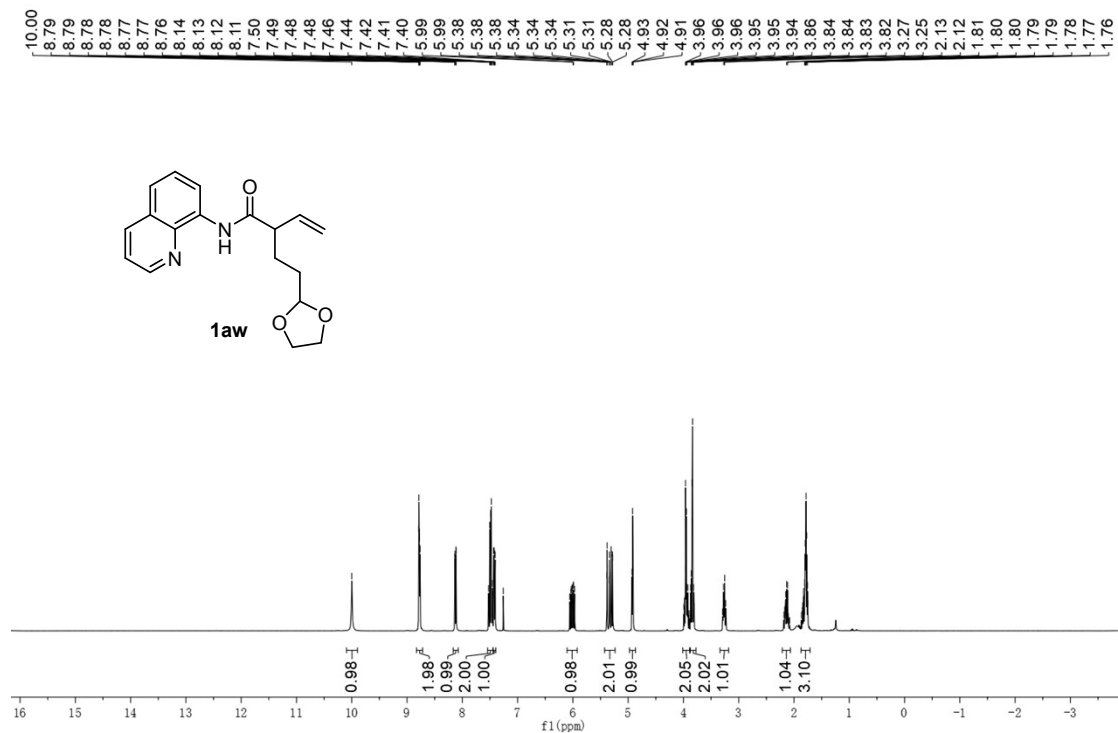

# <sup>13</sup>C NMR of 1aw (CDCl<sub>3</sub>, 101 MHz)

Aug01-2023-c400-cj-0801-71.11.fid

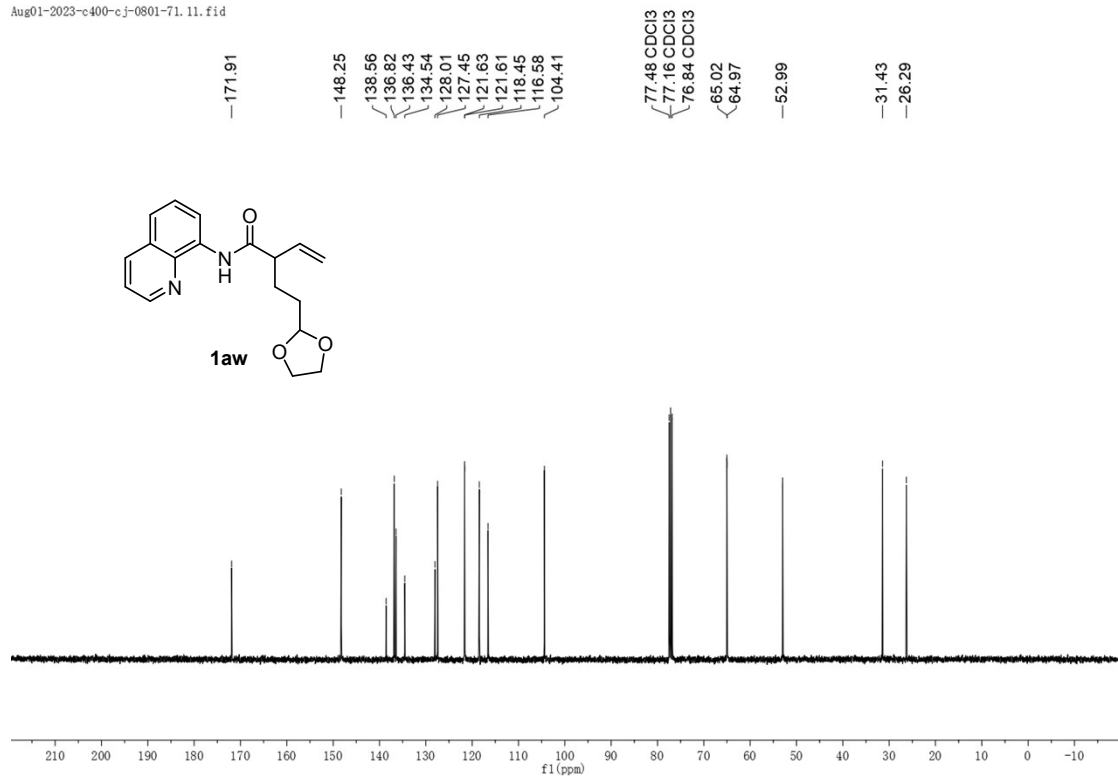

# $^1\text{H}$ NMR of **1ax** ( $\text{CDCl}_3$ , 400 MHz)

Sep20-2023-h400-cj-0920-da.10.fid

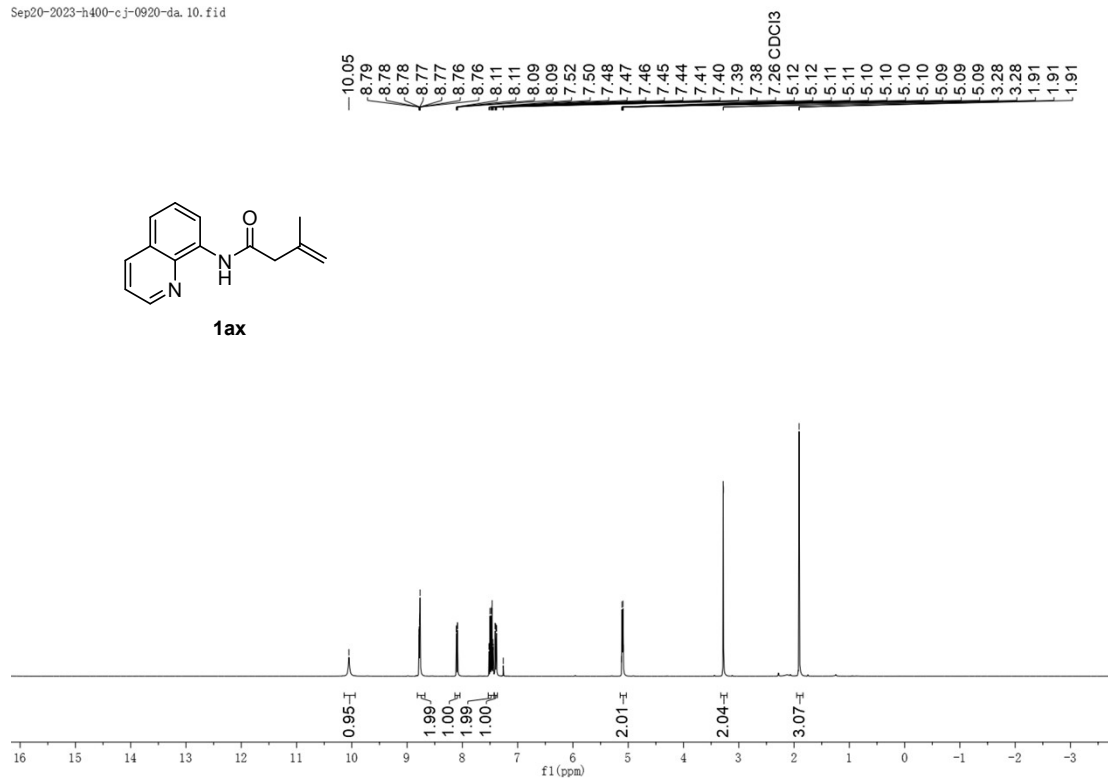

# $^{13}\text{C}$ NMR of **1ax** ( $\text{CDCl}_3$ , 101 MHz)

Sep20-2023-c400-cj-0920-da.11.fid

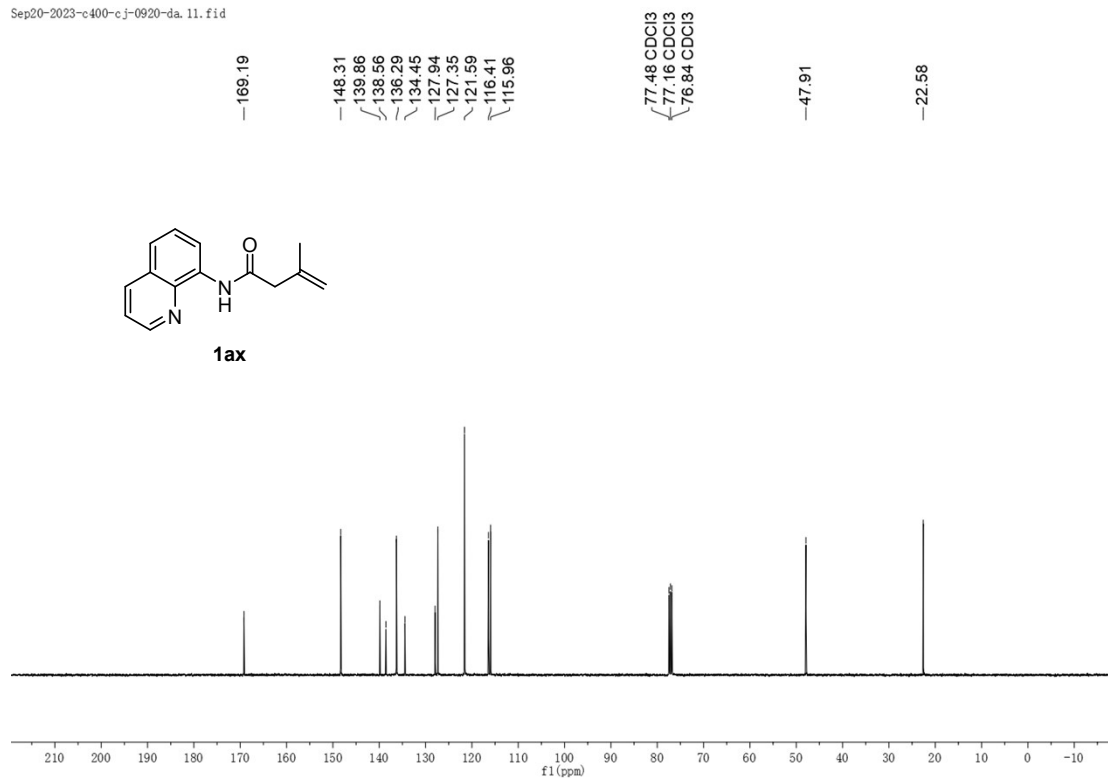

# <sup>1</sup>H NMR of 1ay (CDCl<sub>3</sub>, 400 MHz)

Jul26-2023-H400-cj-0726-27.12.fid

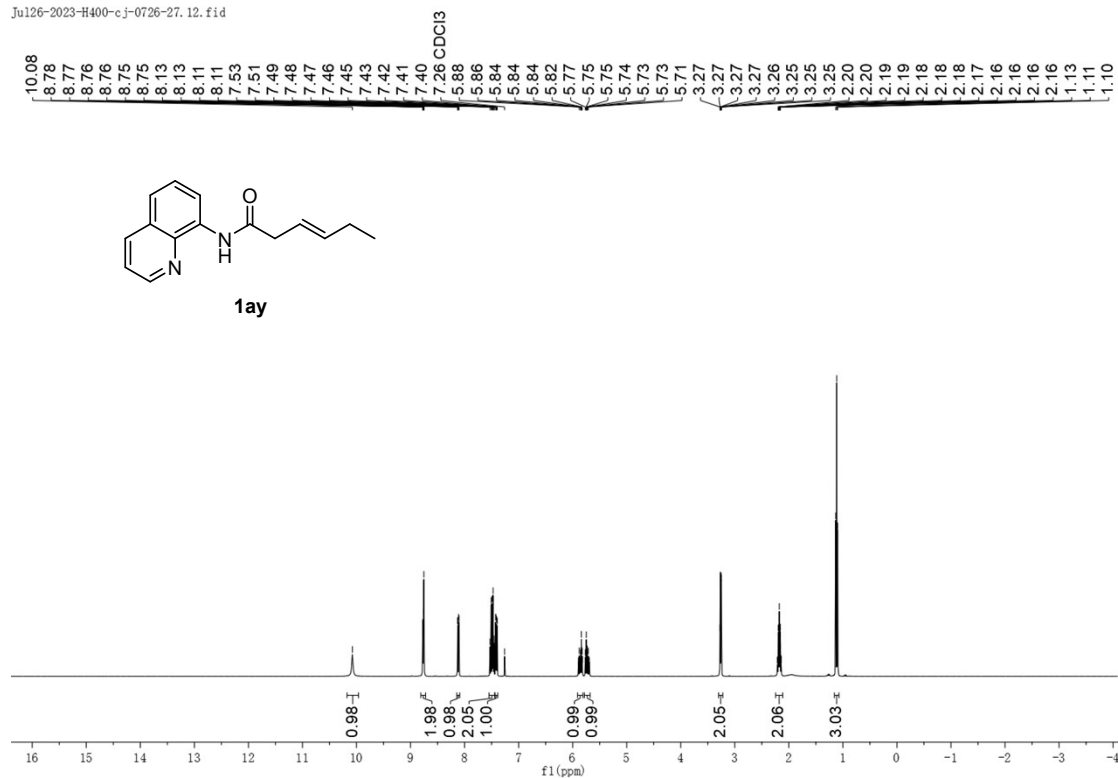

# <sup>13</sup>C NMR of 1ay (CDCl<sub>3</sub>, 101 MHz)

Jul26-2023-C400-cj-0726-27.11.fid

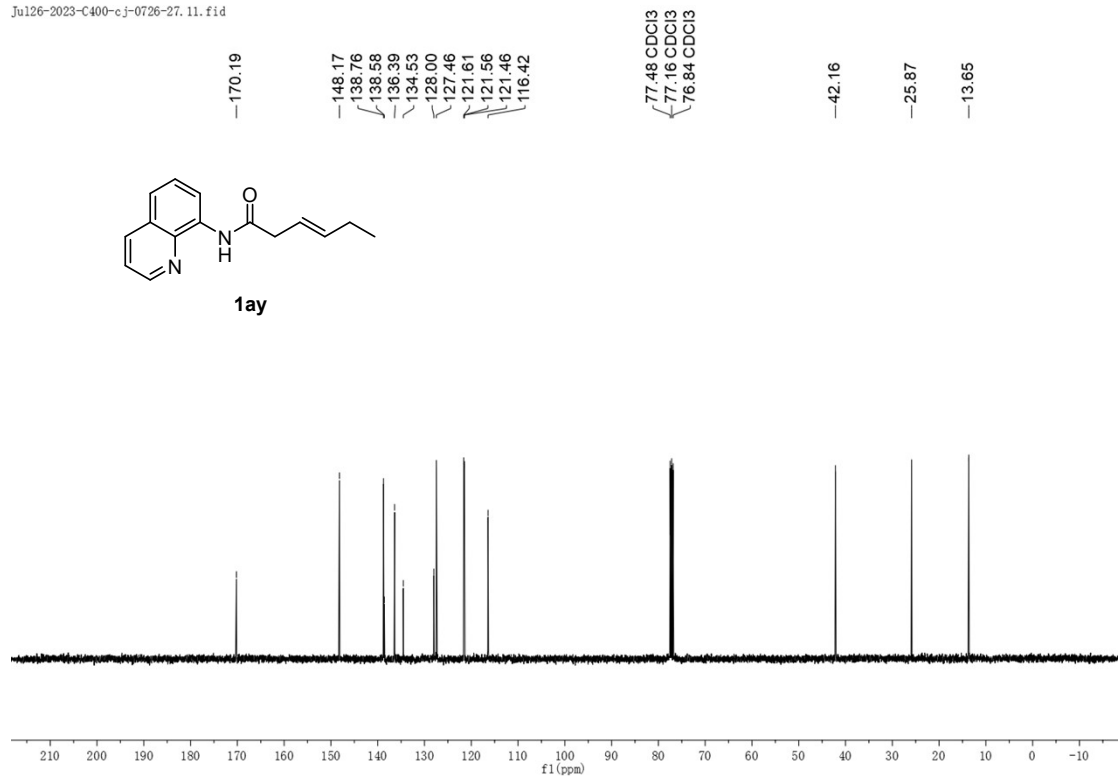

# <sup>1</sup>H NMR of 1ay' (CDCl<sub>3</sub>, 400 MHz)

Sep20-2023-h400-cj-0920-xiao.10.fid

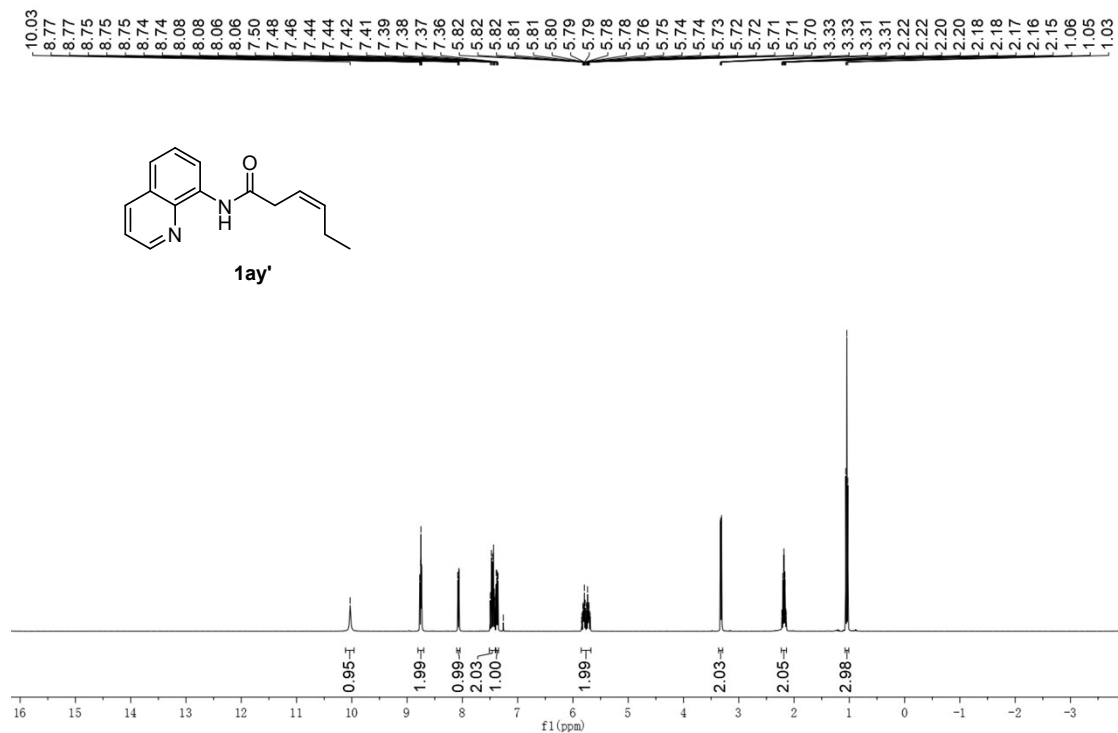

# <sup>13</sup>C NMR of 1ay' (CDCl<sub>3</sub>, 101 MHz)

Sep20-2023-c400-cj-0920-xiao.11.fid

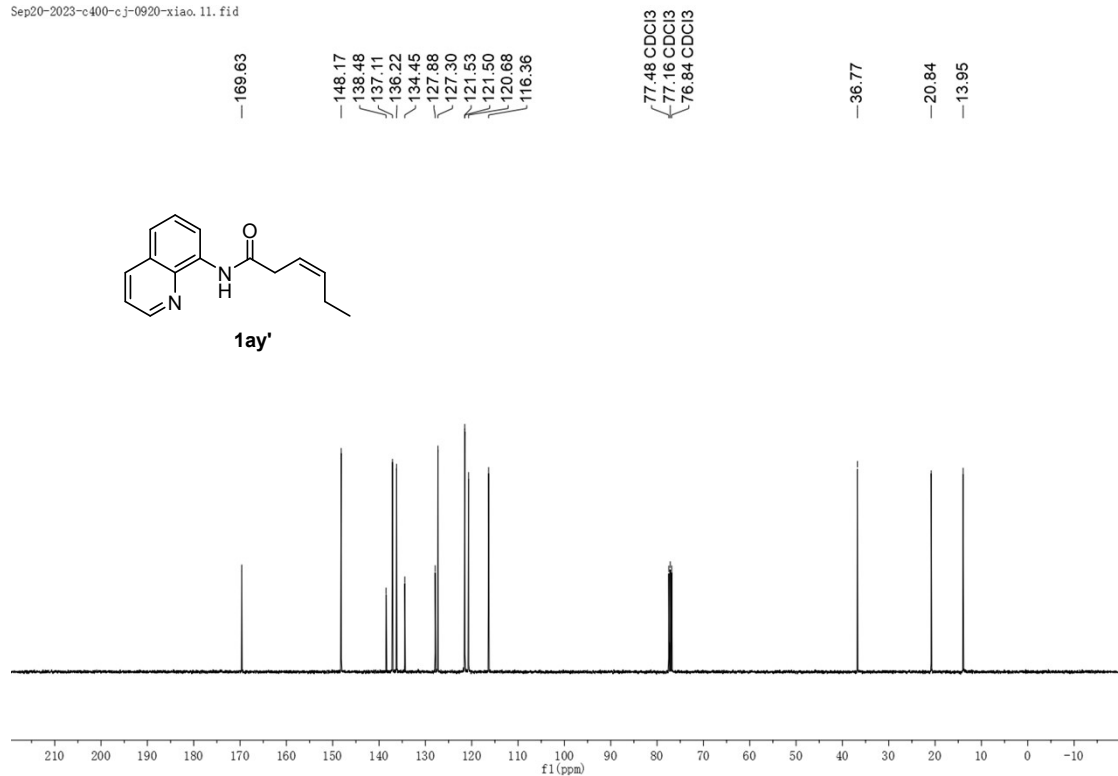



# <sup>1</sup>H NMR of 1b (CDCl<sub>3</sub>, 400 MHz)

Oct25-2022-H400-CJ-1024-ME. 10. fid

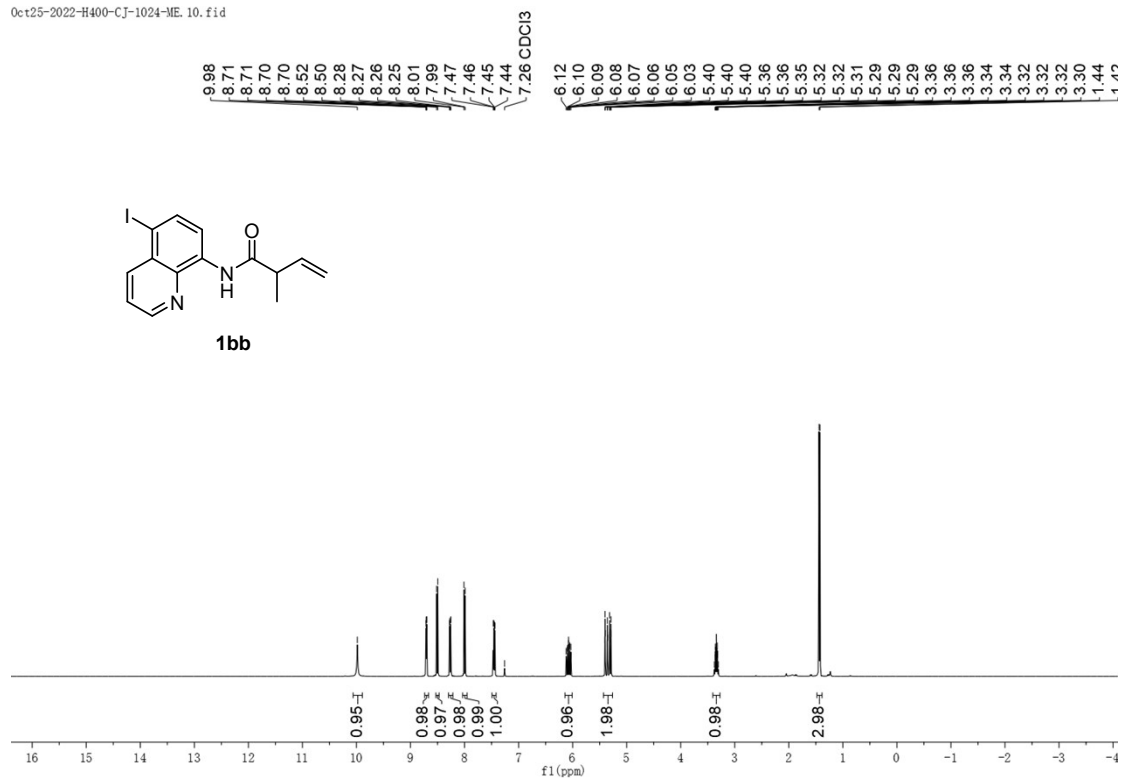

# <sup>13</sup>C NMR of 1b (CDCl<sub>3</sub>, 101 MHz)

Oct25-2022-C400-CJ-1024-ME. 12. fid

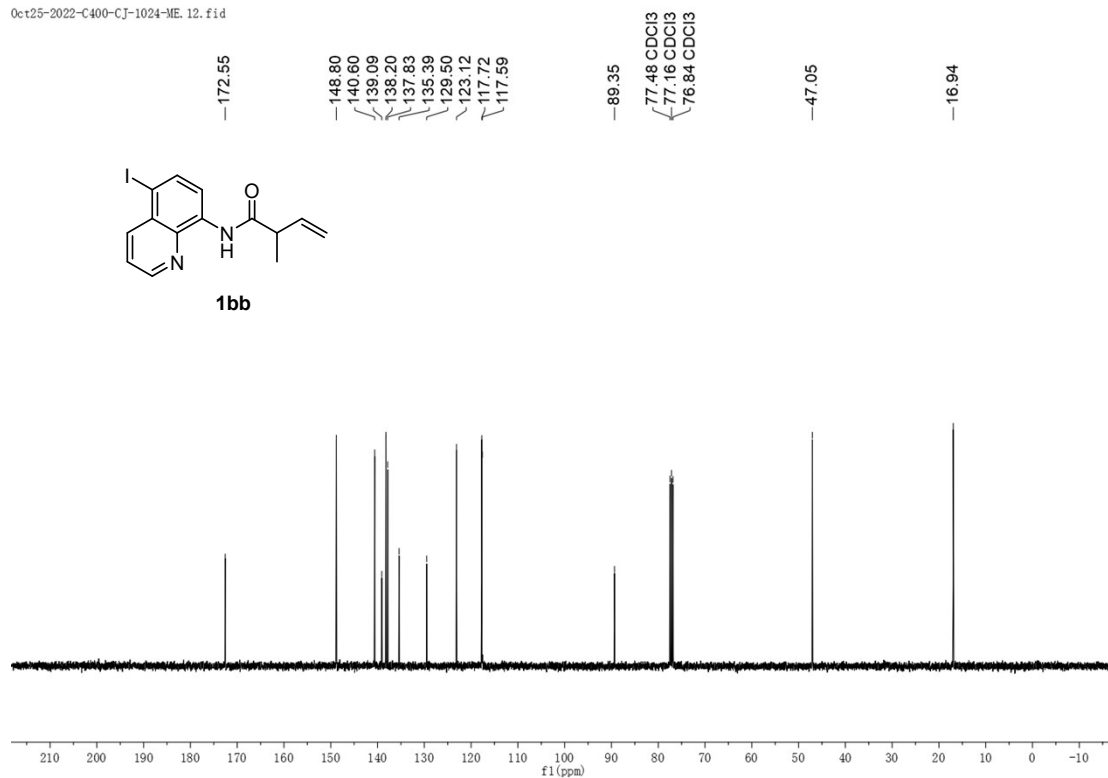

# <sup>1</sup>H NMR of 1bc (CDCl<sub>3</sub>, 400 MHz)

Oct27-2022-h400-cj-1027-et.10.fid

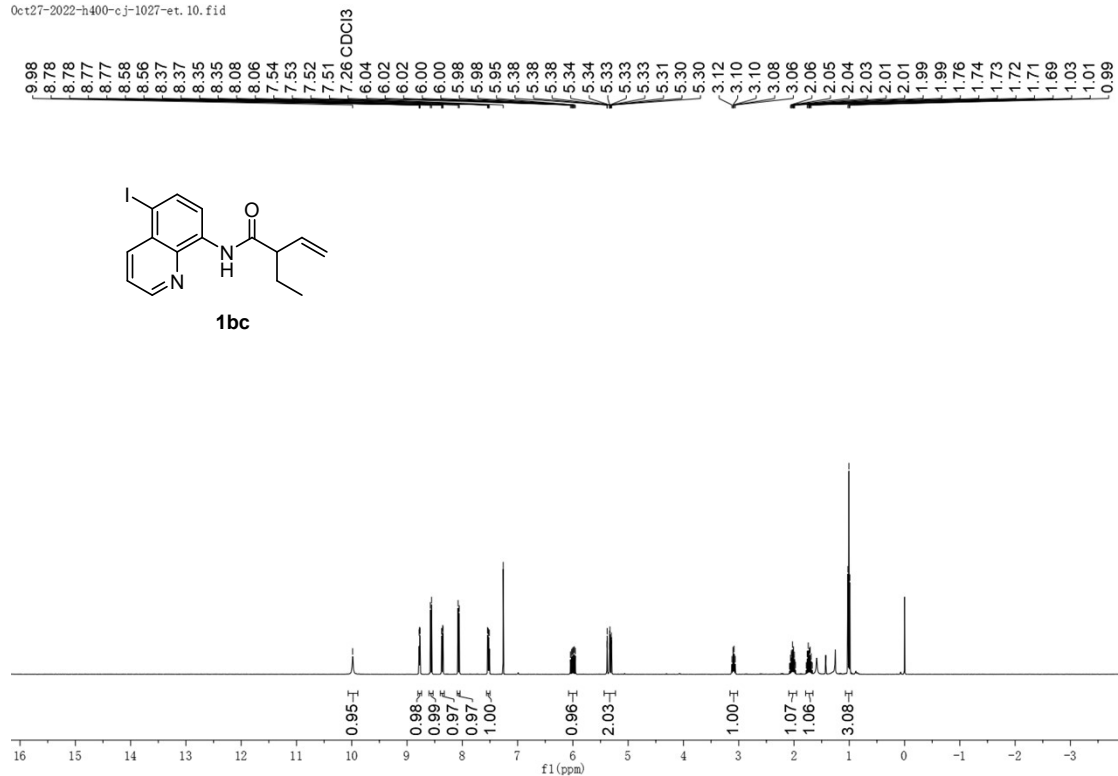

# <sup>13</sup>C NMR of 1bc (CDCl<sub>3</sub>, 101 MHz)

Oct27-2022-c400-cj-1027-et.10.fid

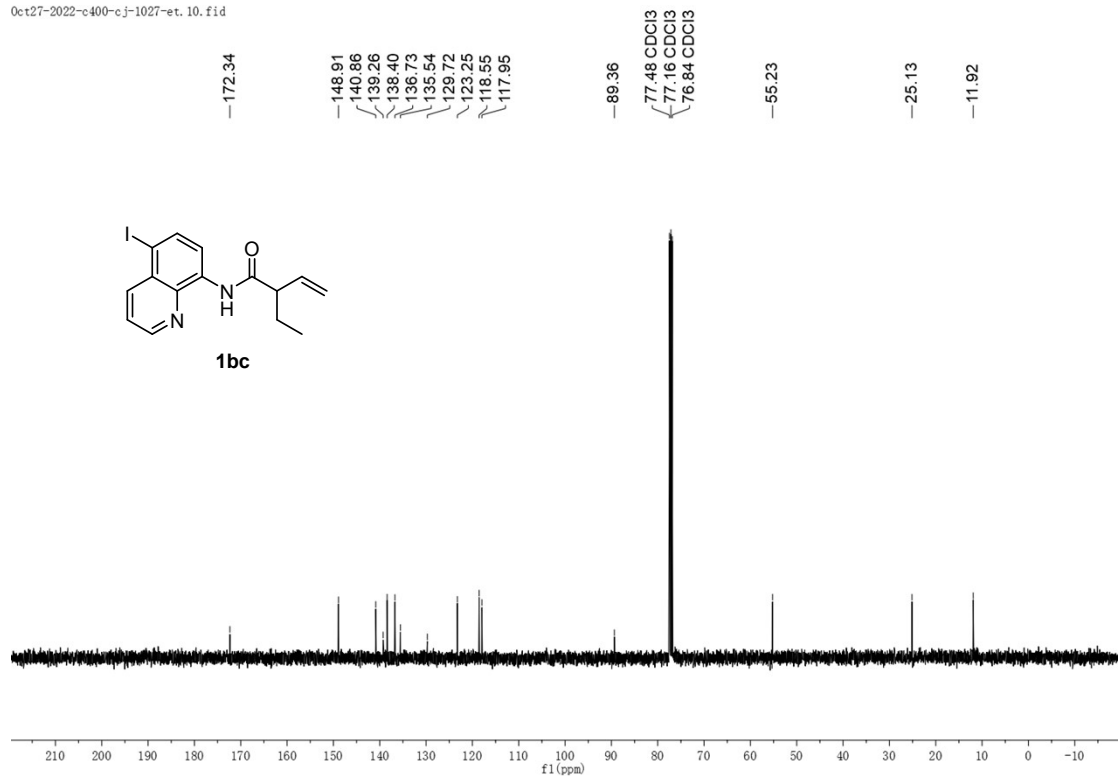

# <sup>1</sup>H NMR of 1bd (CDCl<sub>3</sub>, 400 MHz)

Oct27-2022-h400-cj-1027-cp3.10.fid

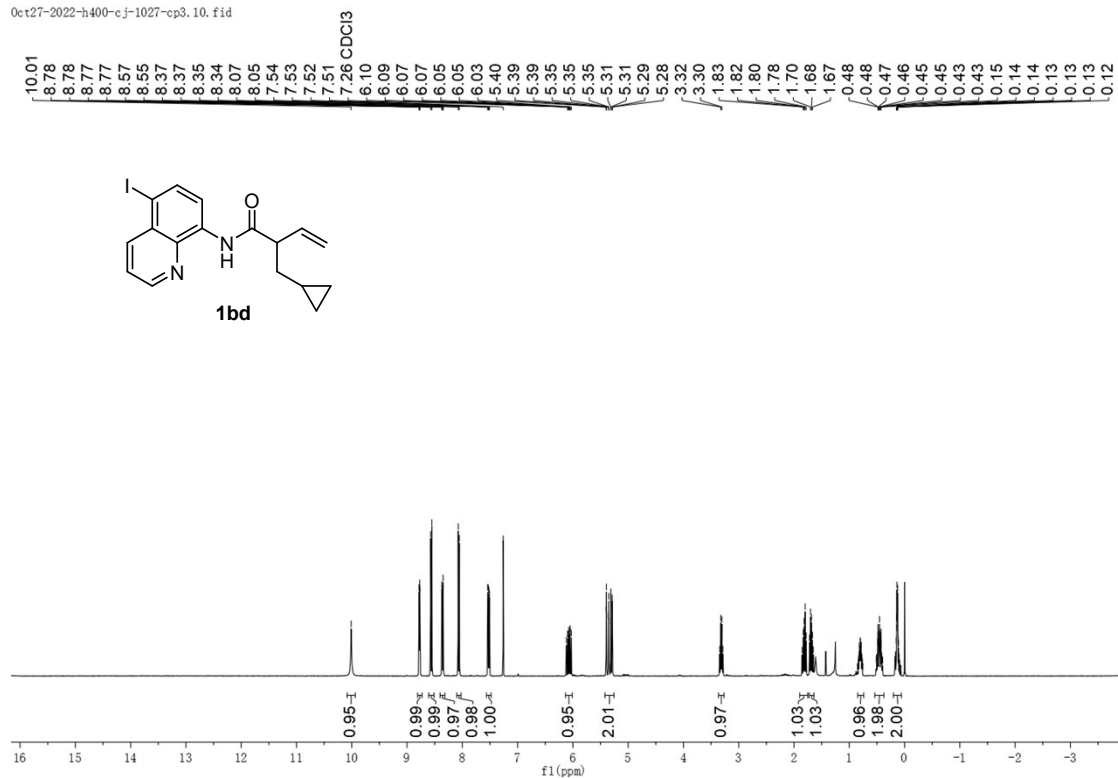

# <sup>13</sup>C NMR of 1bd (CDCl<sub>3</sub>, 101 MHz)

Oct27-2022-c400-cj-1027-cp3.10.fid

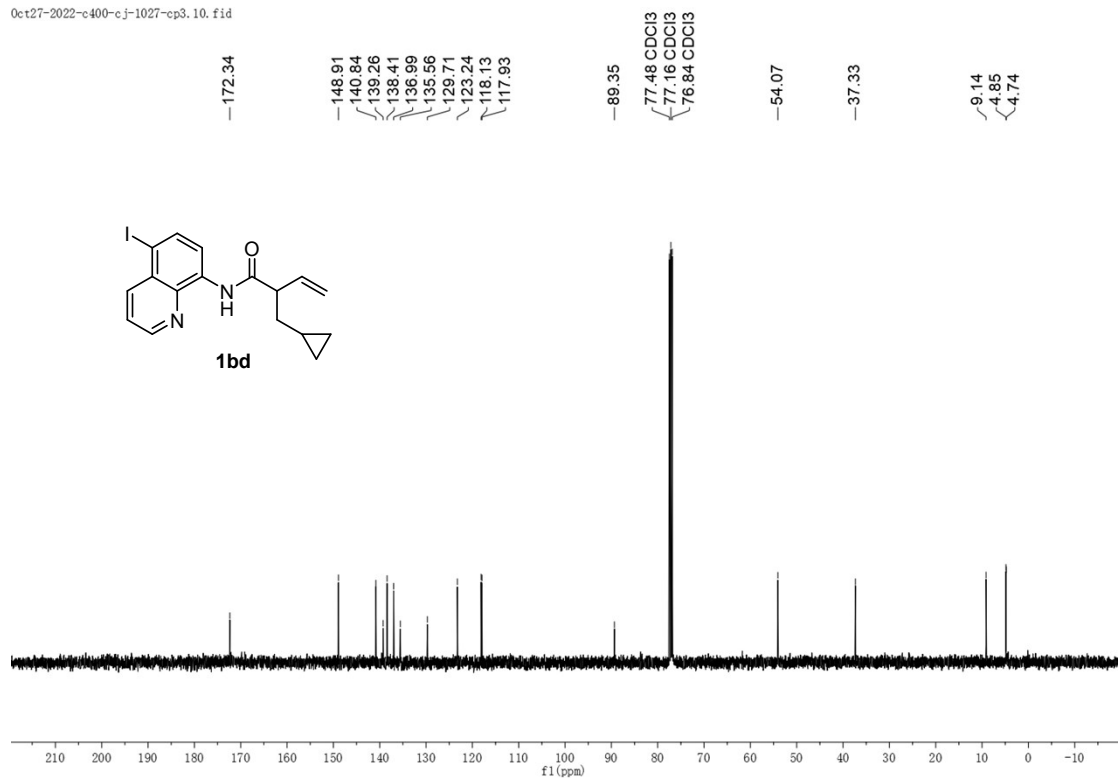

# <sup>1</sup>H NMR of 1be (CDCl<sub>3</sub>, 400 MHz)

Nov01-2022-h400-cj-1101-CD4.10.fid

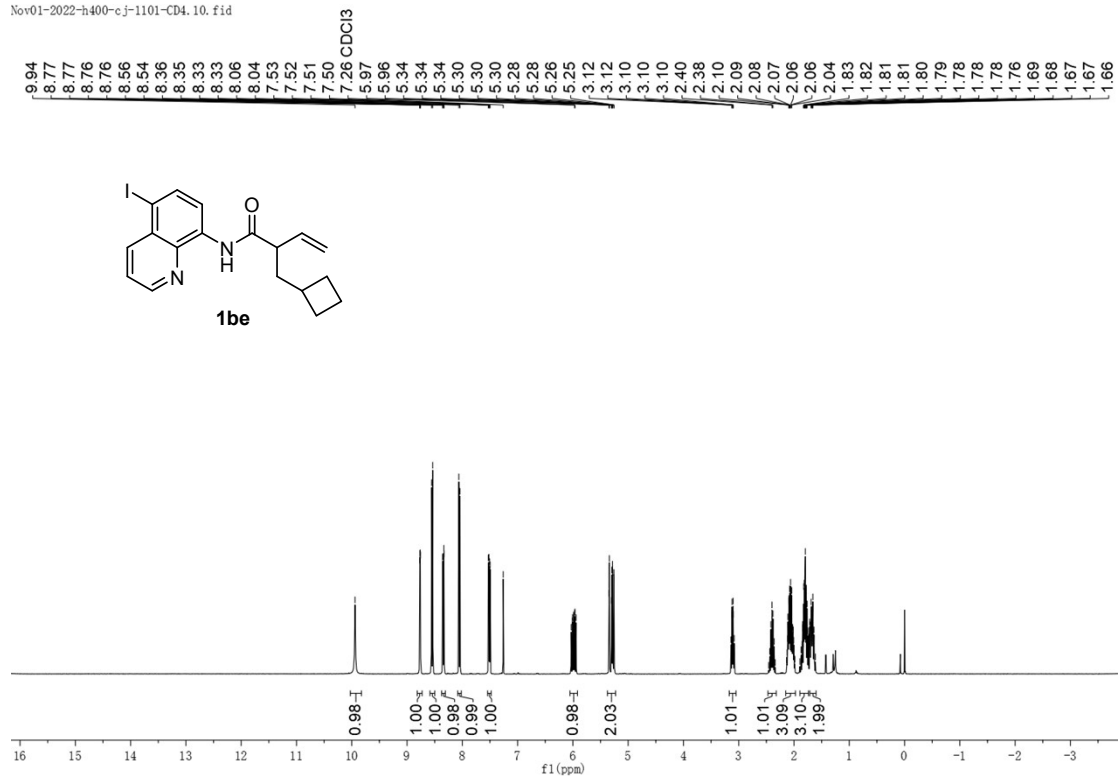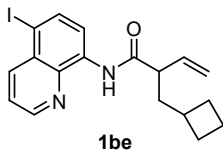

# <sup>13</sup>C NMR of 1be (CDCl<sub>3</sub>, 101 MHz)

Nov01-2022-c400-cj-1101-CD4.10.fid

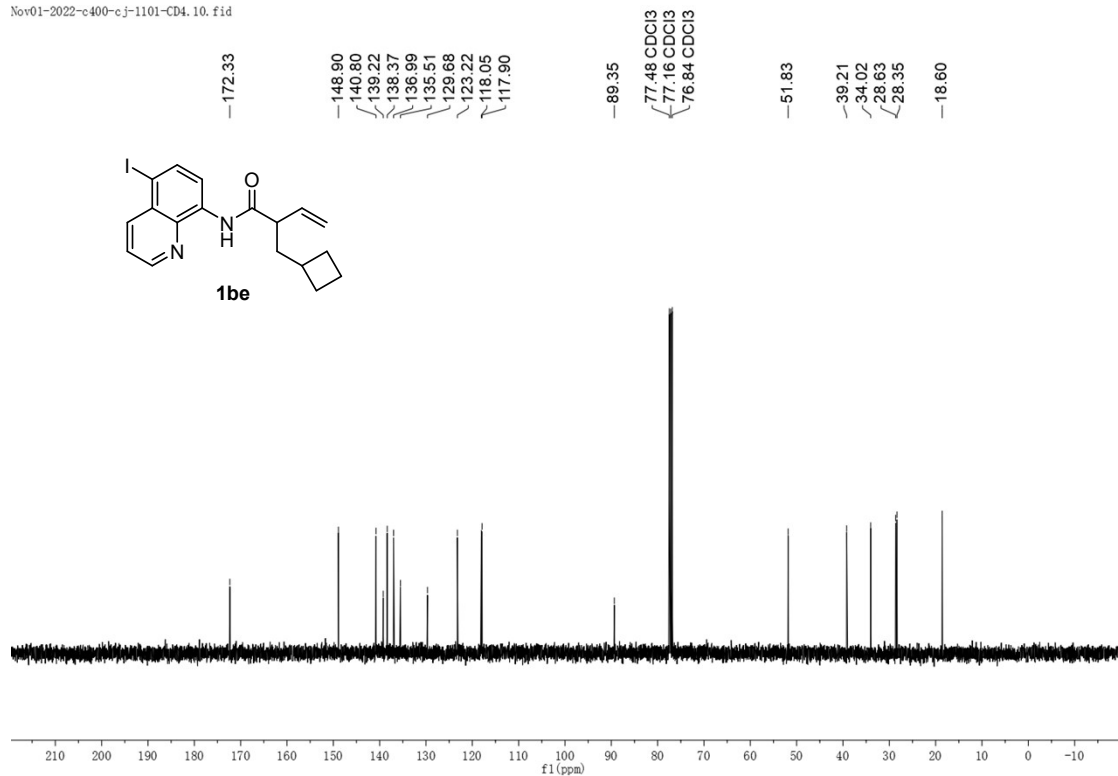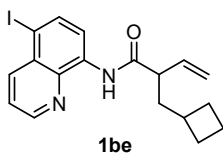

# <sup>1</sup>H NMR of 1bf (CDCl<sub>3</sub>, 400 MHz)

Oct27-2022-h400-cj-1027-cp5.10.fid

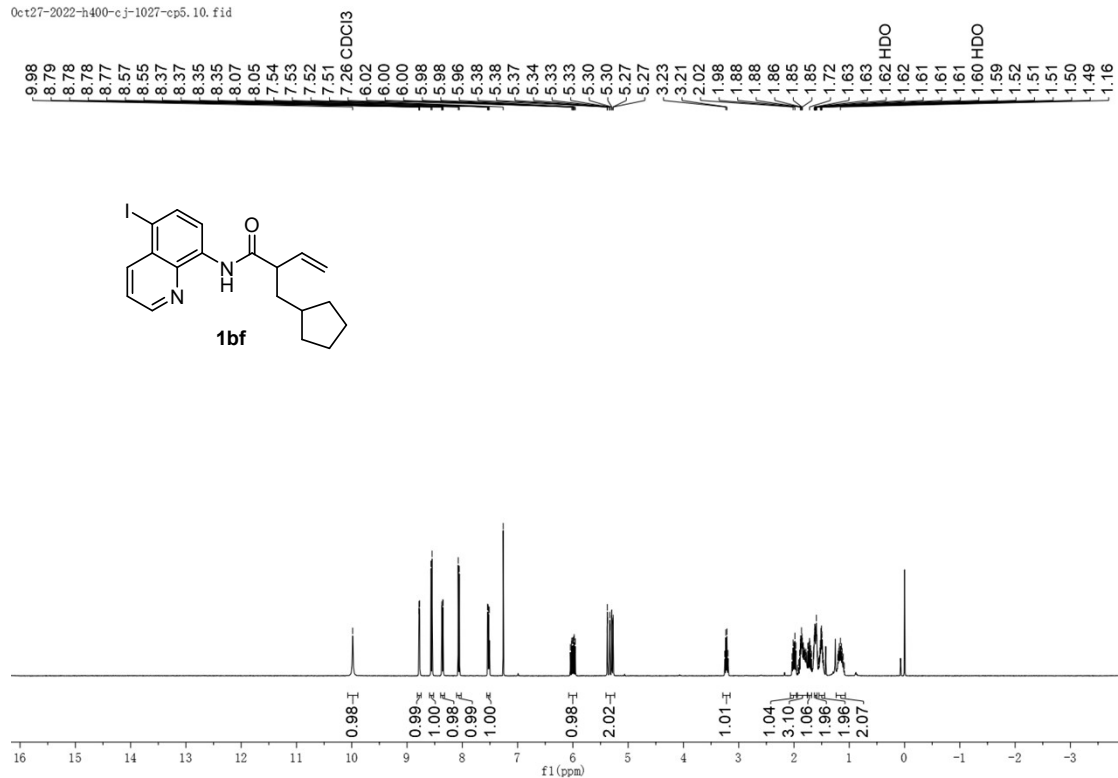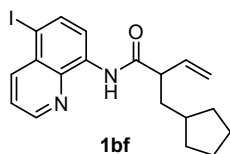

# <sup>13</sup>C NMR of 1bf (CDCl<sub>3</sub>, 101 MHz)

Oct27-2022-c400-cj-1027-cp5.10.fid

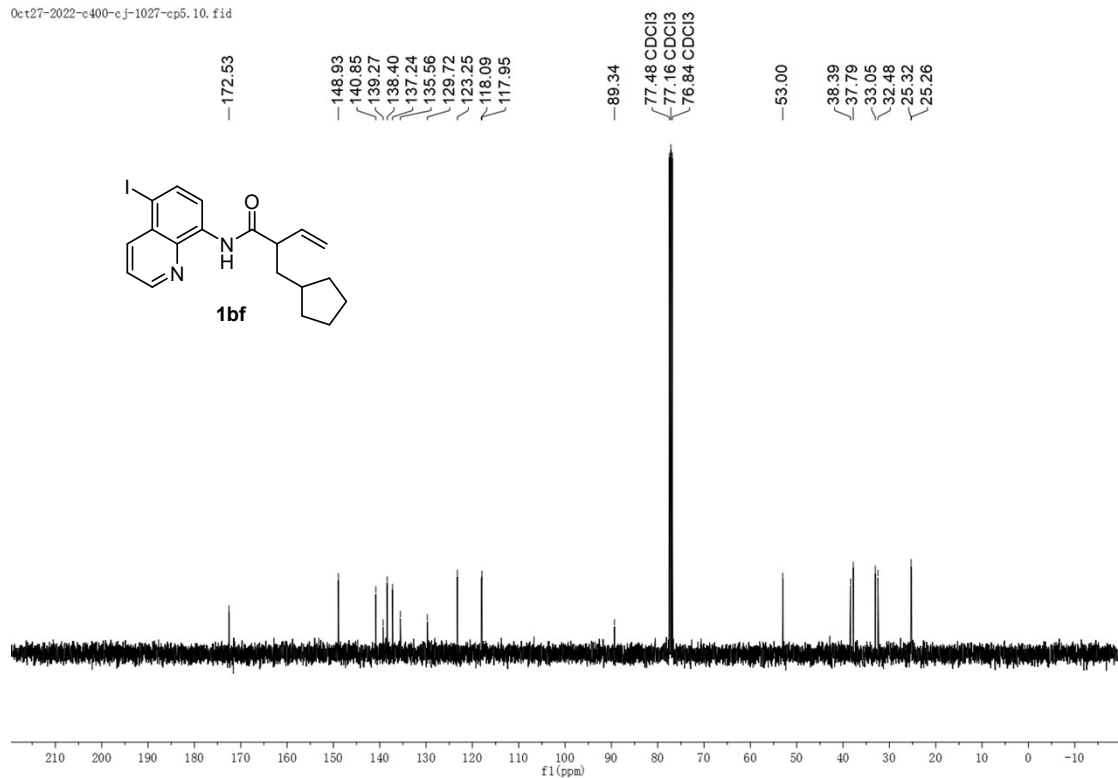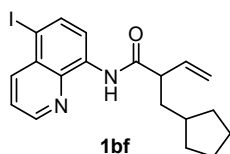

# <sup>1</sup>H NMR of 1bg (CDCl<sub>3</sub>, 400 MHz)

Oct24-2022-h400-cj-1024-iPr. 10. fid

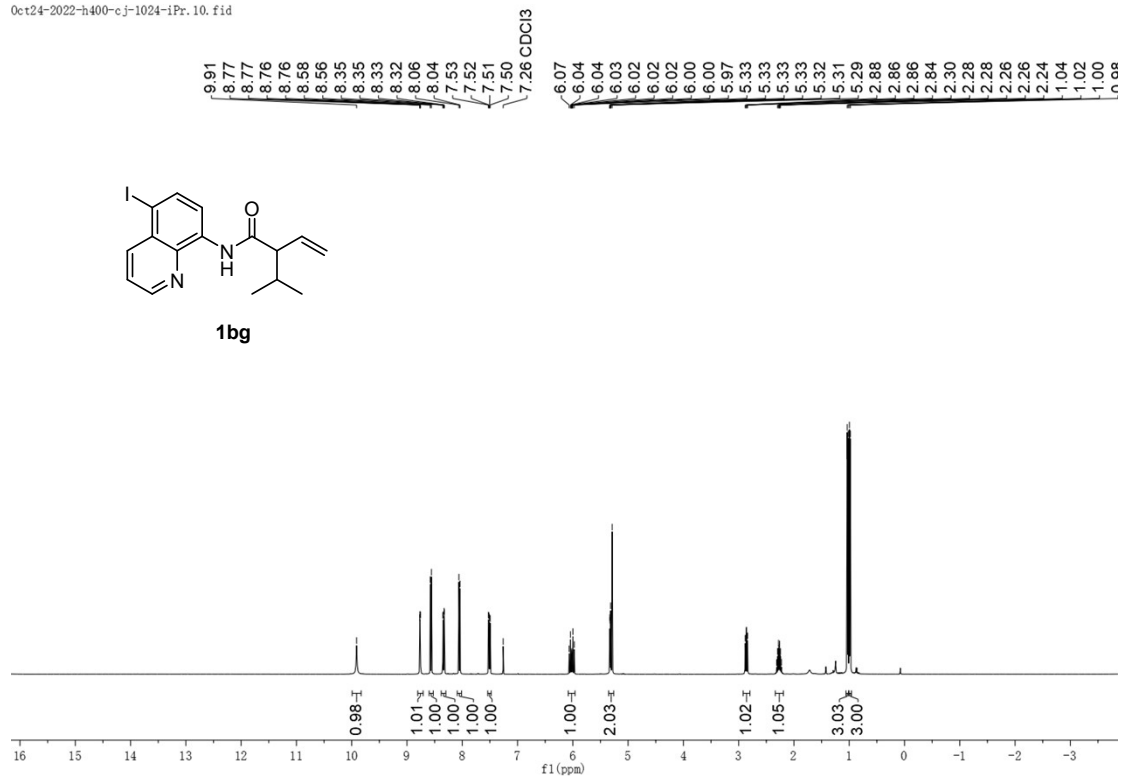

# <sup>13</sup>C NMR of 1bg (CDCl<sub>3</sub>, 101 MHz)

Oct24-2022-c400-cj-1024-iPr. 10. fid

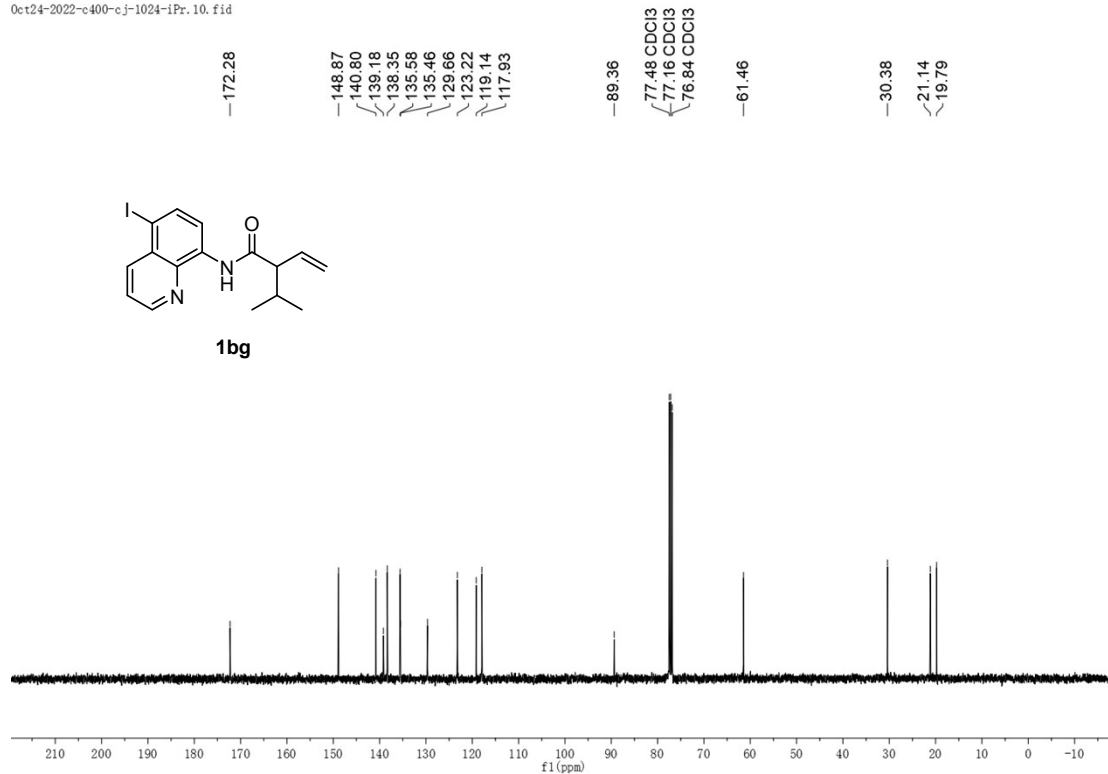

# <sup>1</sup>H NMR of 1b (CDCl<sub>3</sub>, 400 MHz)

Nov08-2022-h400-cj-1108-bn.10.fid

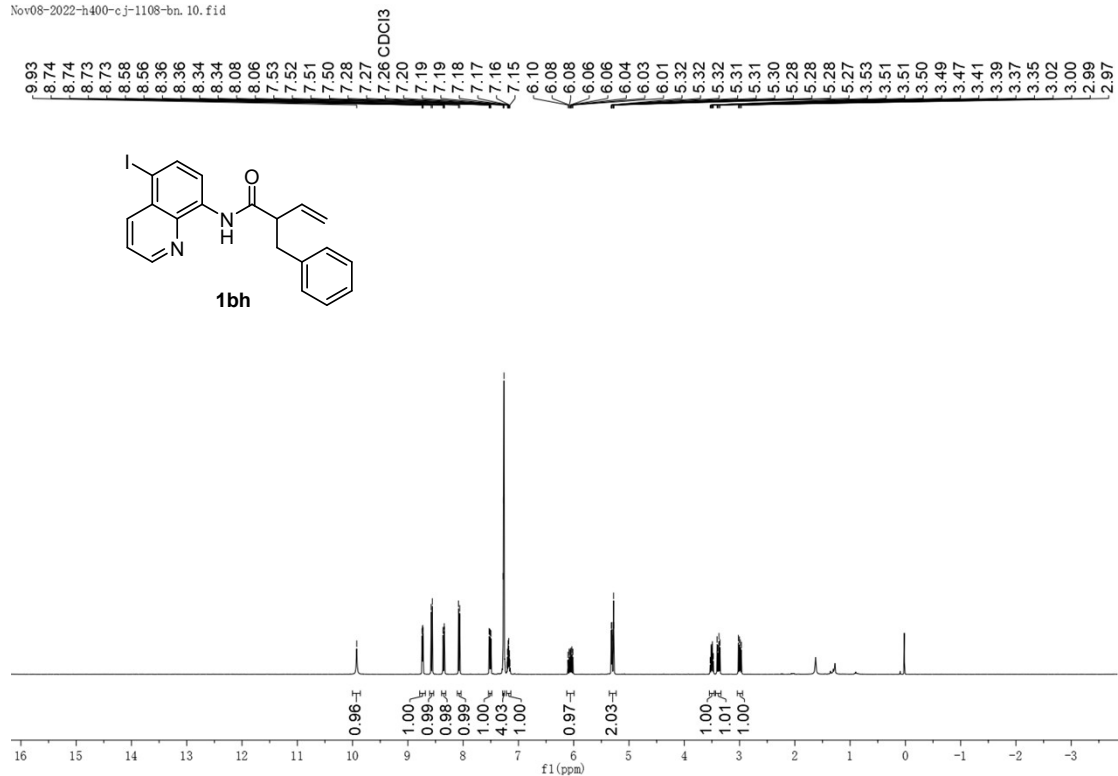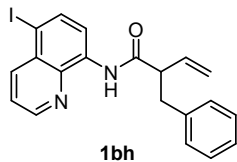

# <sup>13</sup>C NMR of 1b (CDCl<sub>3</sub>, 101 MHz)

Nov08-2022-c400-cj-1108-bn.10.fid

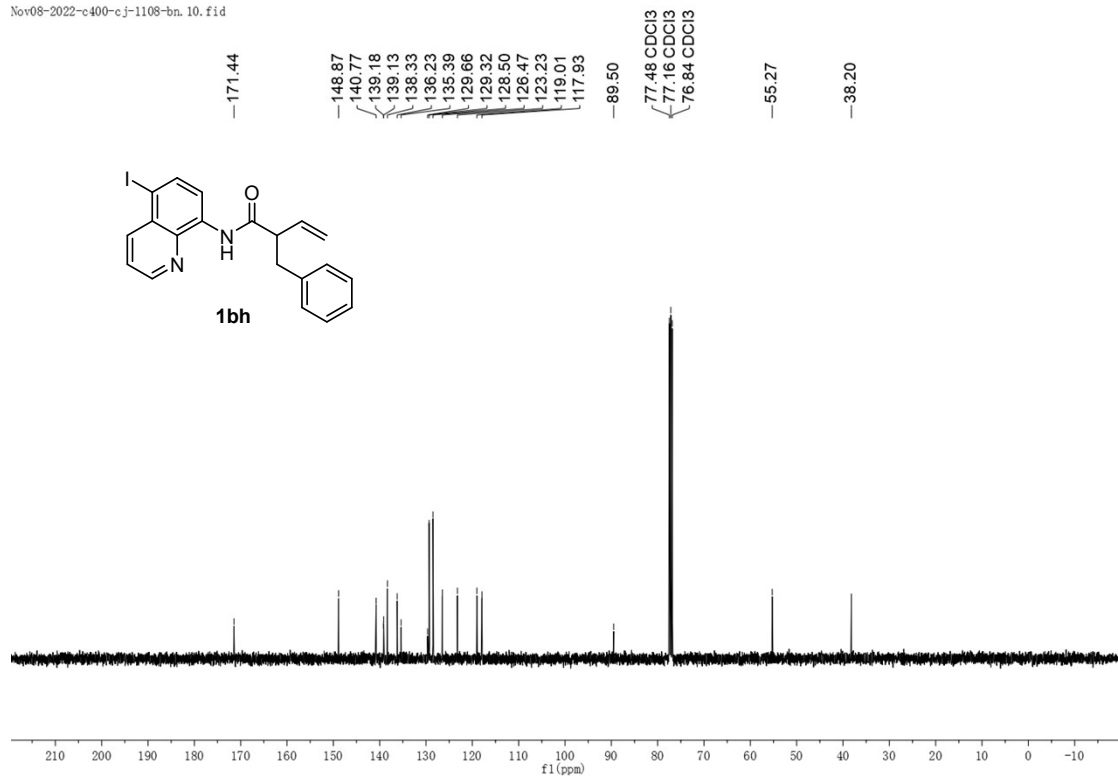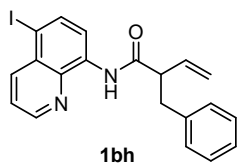

# <sup>1</sup>H NMR of 1bi (CDCl<sub>3</sub>, 400 MHz)

Nov22-2022-h400-c-j-1122-mme.10.fid

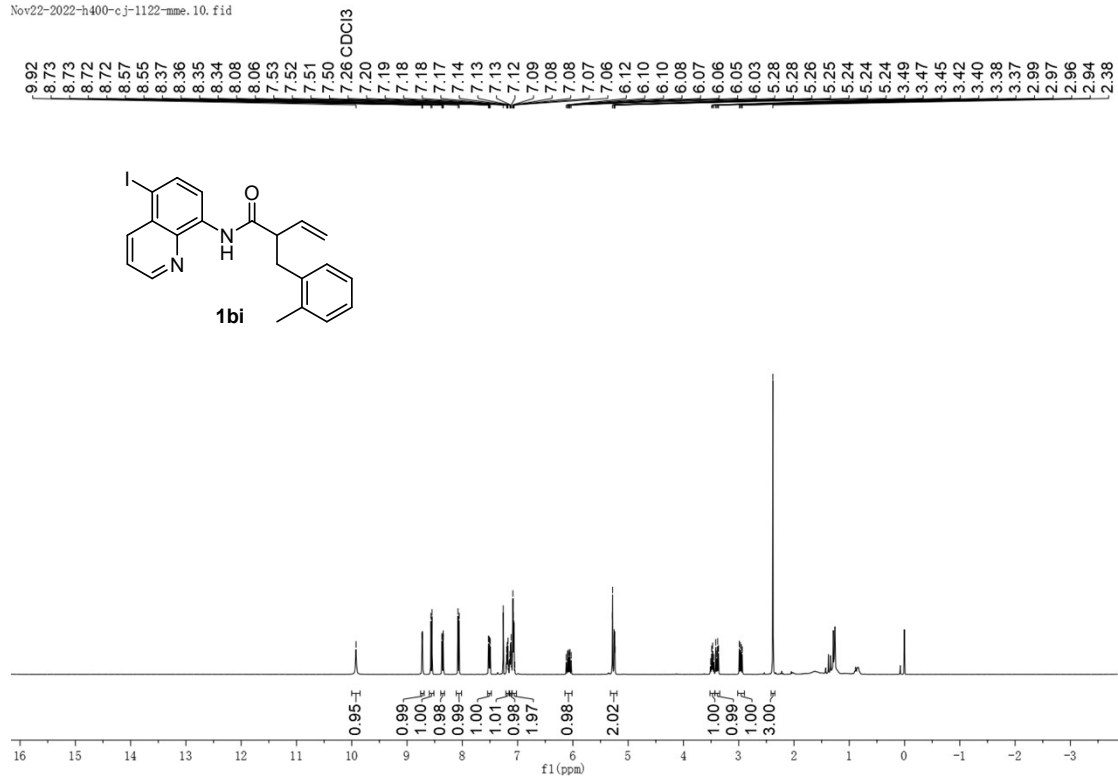

# <sup>13</sup>C NMR of 1bi (CDCl<sub>3</sub>, 101 MHz)

Nov22-2022-c400-c-j-1122-mme.10.fid

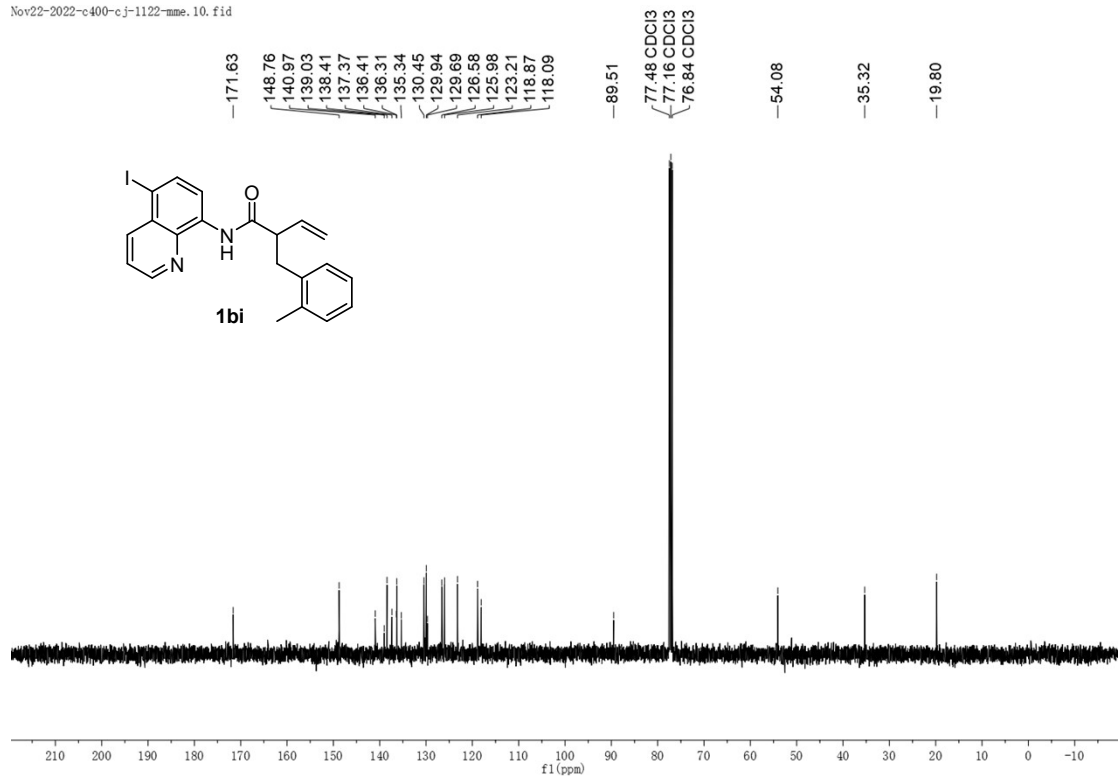



# <sup>1</sup>H NMR of 1bj(CDCl<sub>3</sub>, 400 MHz)

Nov25-2022-h400-c-j-1125-ome.10.fid

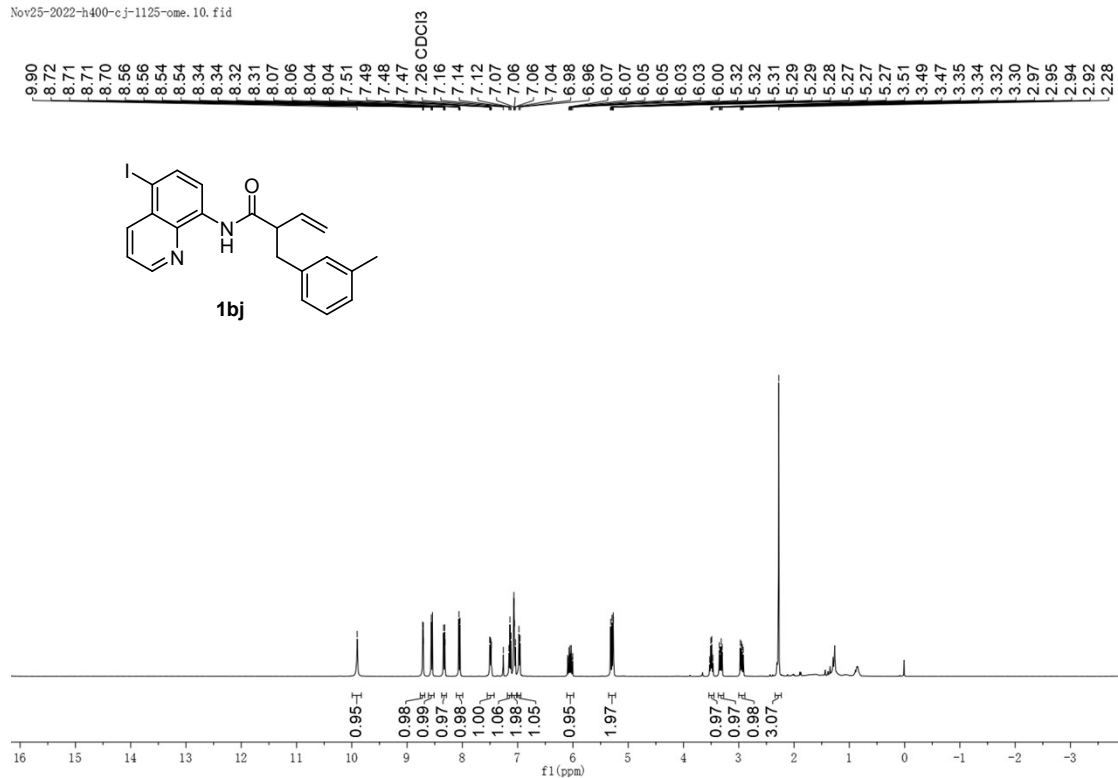

# <sup>13</sup>C NMR of 1bj (CDCl<sub>3</sub>, 101 MHz)

Nov25-2022-c400-c-j-1125-ome.10.fid

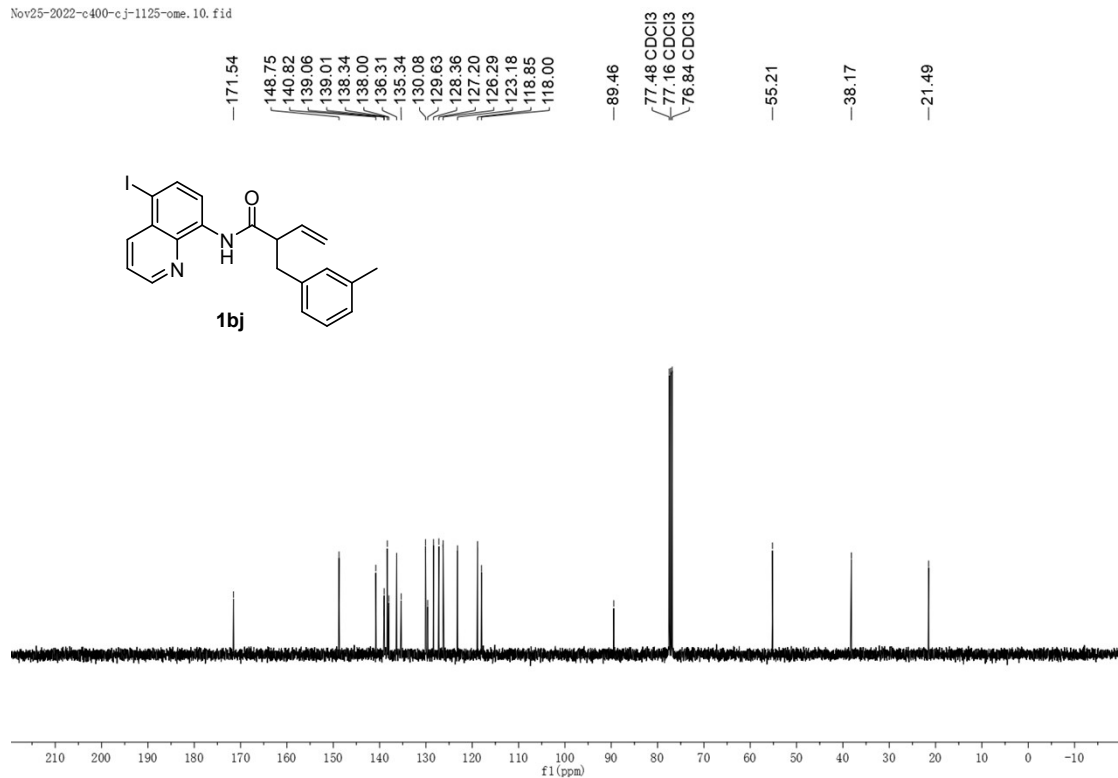

# <sup>1</sup>H NMR of 1bk (CDCl<sub>3</sub>, 400 MHz)

Nov22-2022-h400-c-j-1122-pme.10.fid

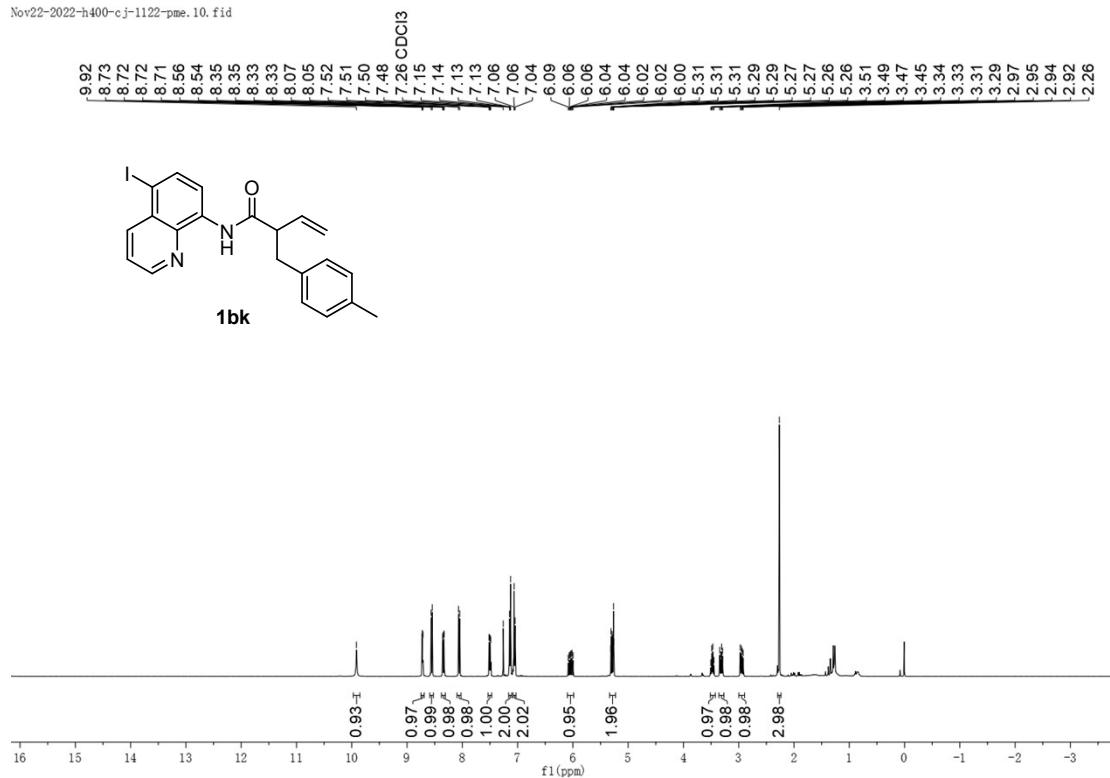

# <sup>13</sup>C NMR of 1bk (CDCl<sub>3</sub>, 101 MHz)

Nov22-2022-h400-c-j-1122-pme.11.fid

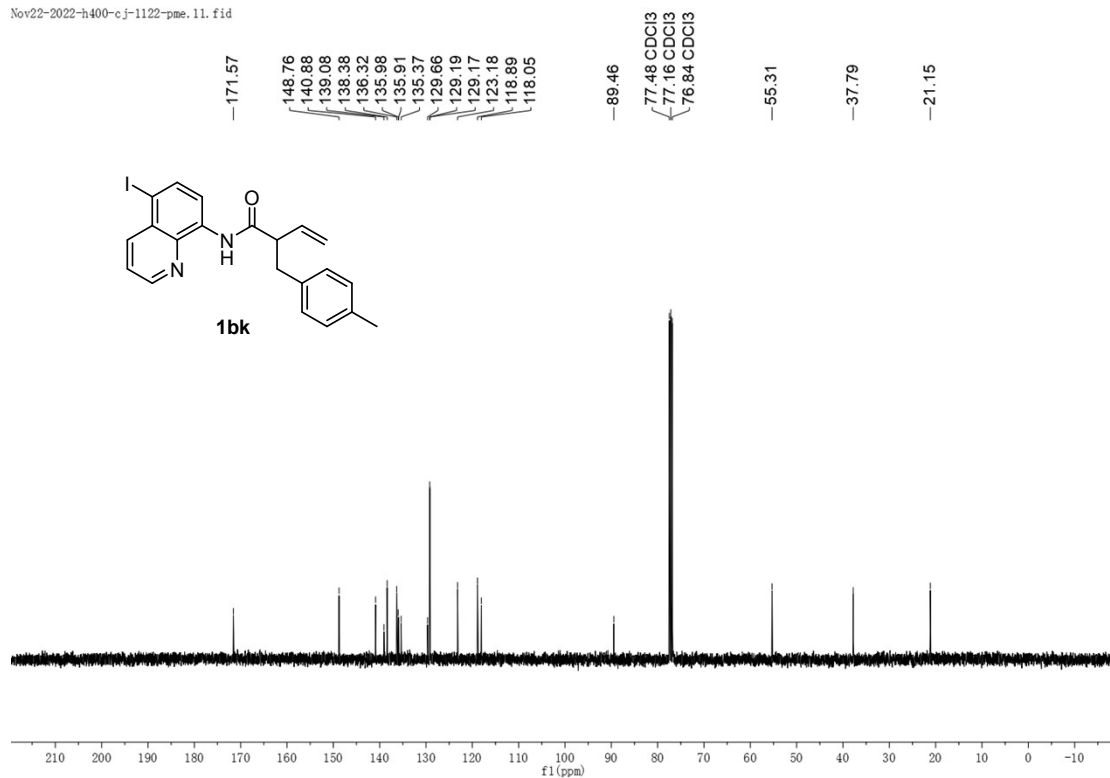

# <sup>1</sup>H NMR of 1b1 (CDCl<sub>3</sub>, 400 MHz)

Nov10-2022-H400-cj-1110-f1.10.fid

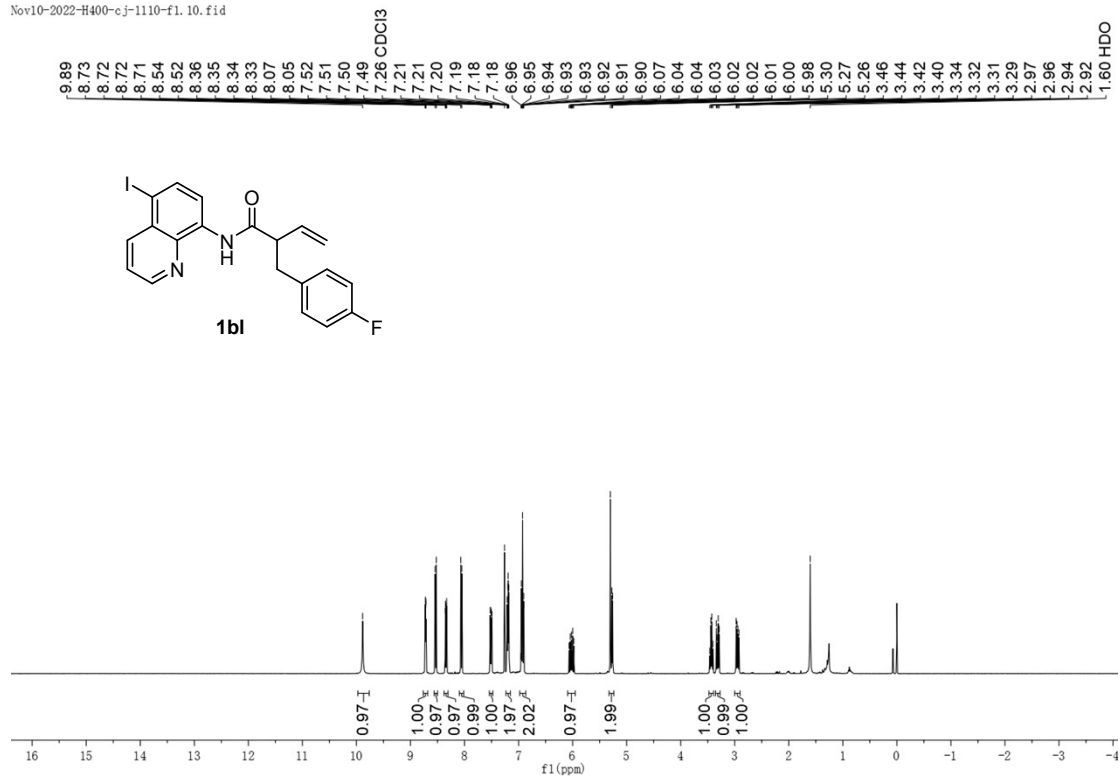

# <sup>13</sup>C NMR of 1b1 (CDCl<sub>3</sub>, 101 MHz)

Nov10-2022-C400-CJ-1110-F1.10.fid

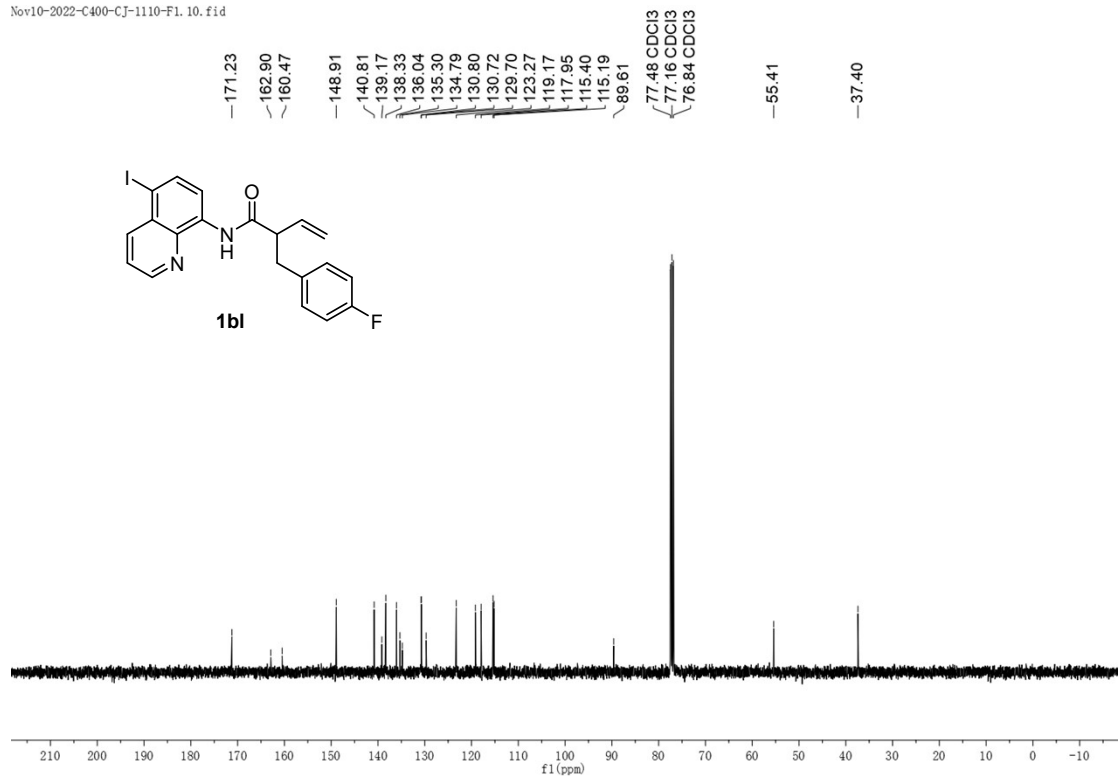

# <sup>19</sup>F NMR of 1b1 (CDCl<sub>3</sub>, 376 MHz)

Nov24-2022-H400-cj-1124-F.10.fid

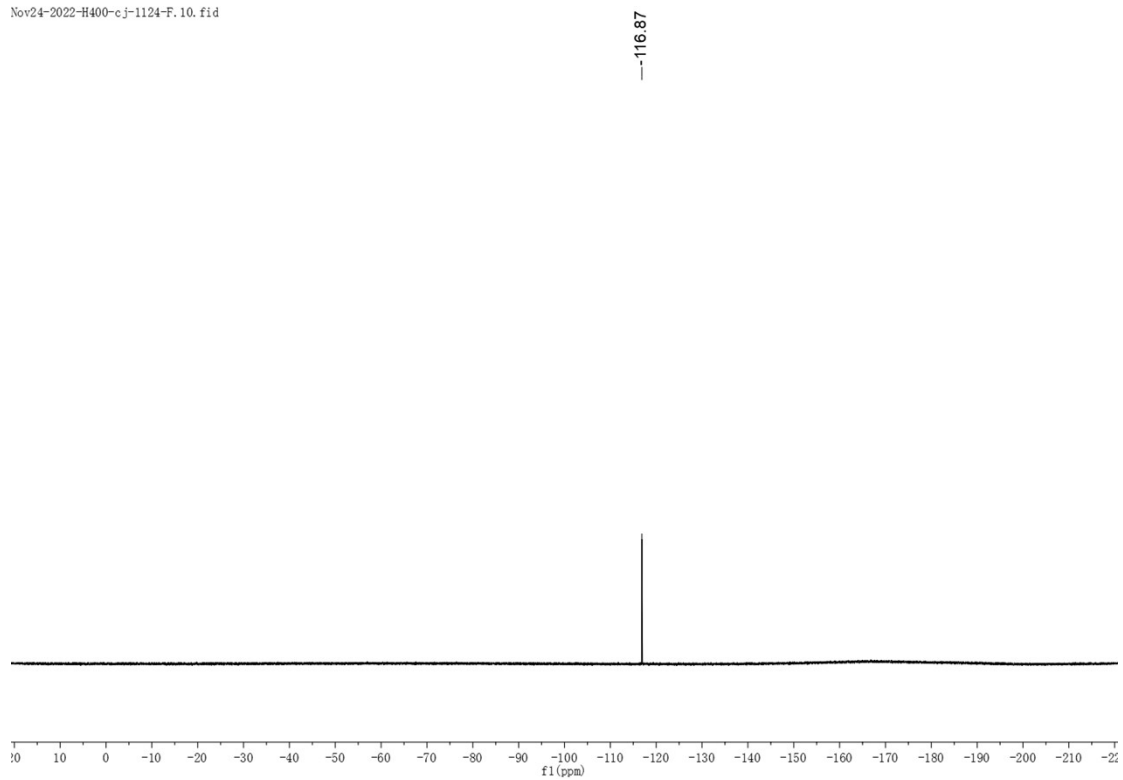

# <sup>1</sup>H NMR of 1bm (CDCl<sub>3</sub>, 400 MHz)

Nov01-2022-h400-cj-1101-EtX. 10. fid

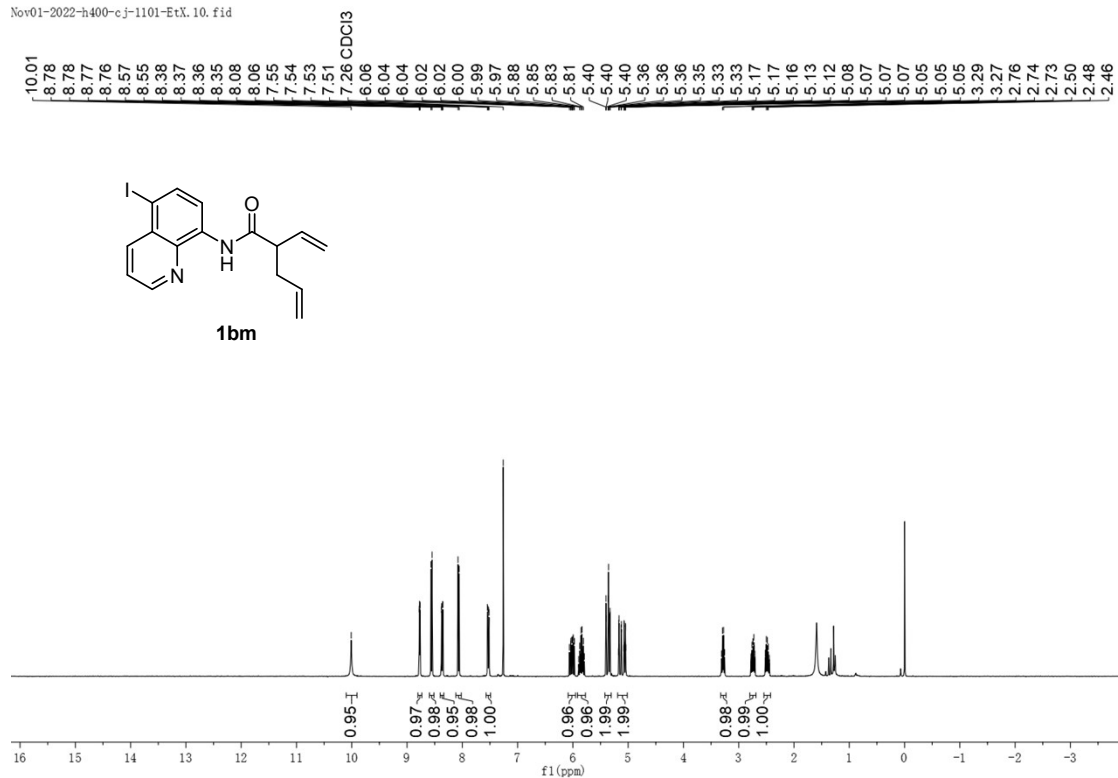

# <sup>13</sup>C NMR of 1bm (CDCl<sub>3</sub>, 101 MHz)

May22-2023-C400-cj-0524-4EtX. 10. fid

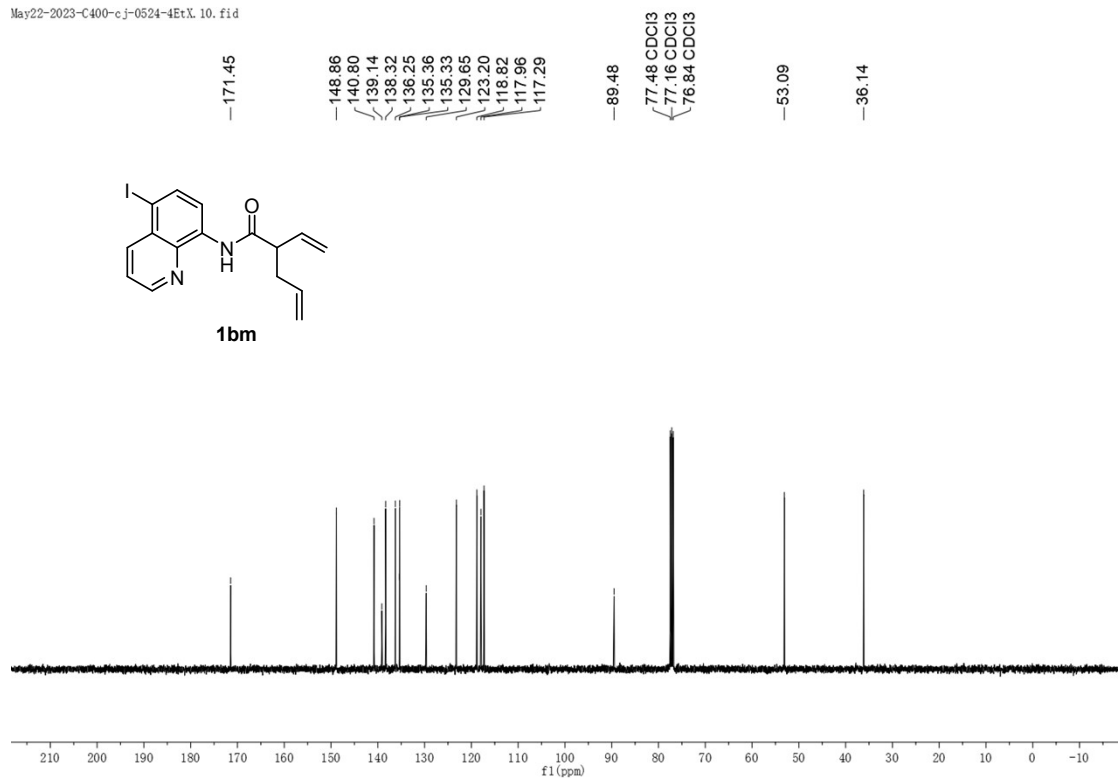

# <sup>1</sup>H NMR of 1bn (CDCl<sub>3</sub>, 400 MHz)

Nov17-2023-h400-cj-1117-cl.10.fid

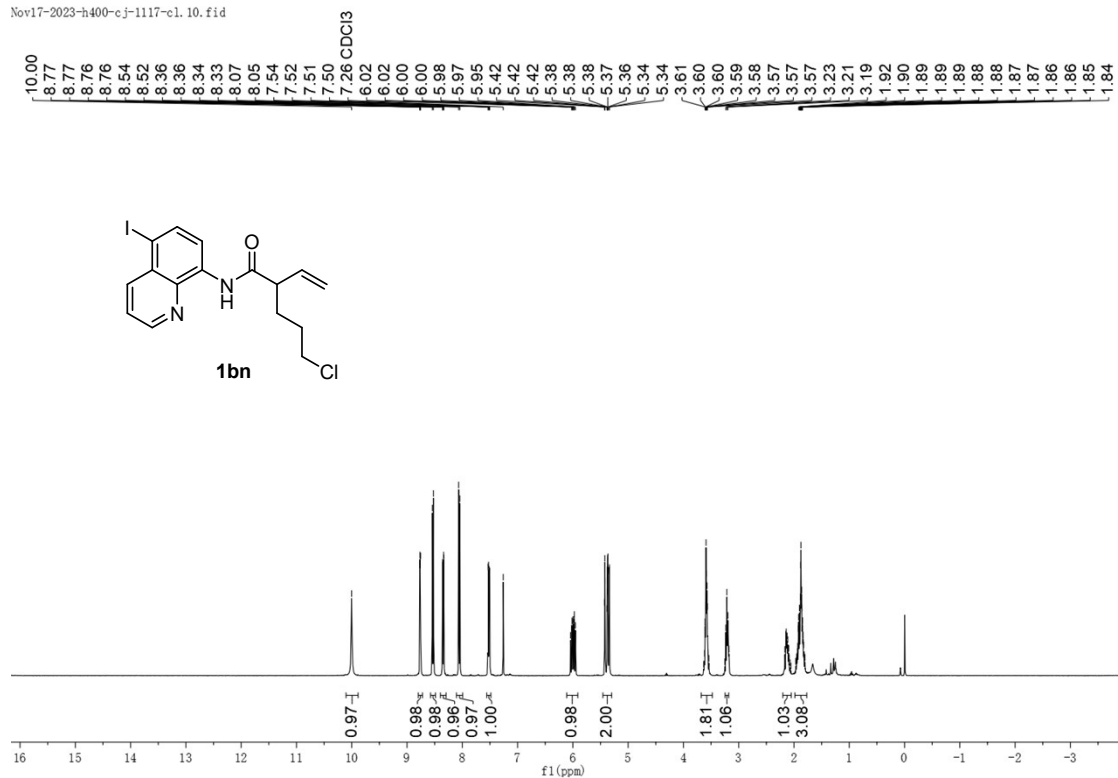

# <sup>13</sup>C NMR of 1bn (CDCl<sub>3</sub>, 101 MHz)

Nov21-2023-c400-cj-1117-cl.10.fid

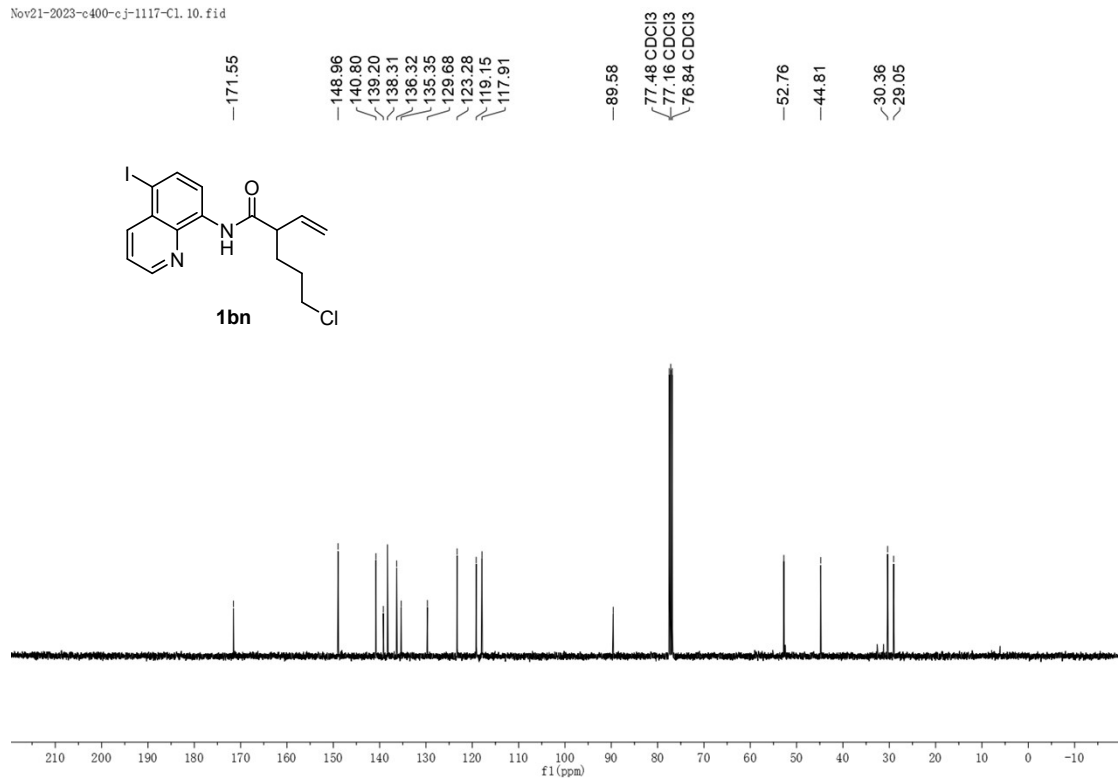

# <sup>1</sup>H NMR of 1bo (CDCl<sub>3</sub>, 400 MHz)

Nov08-2022-h400-c-j-1108-bnc.10.fid

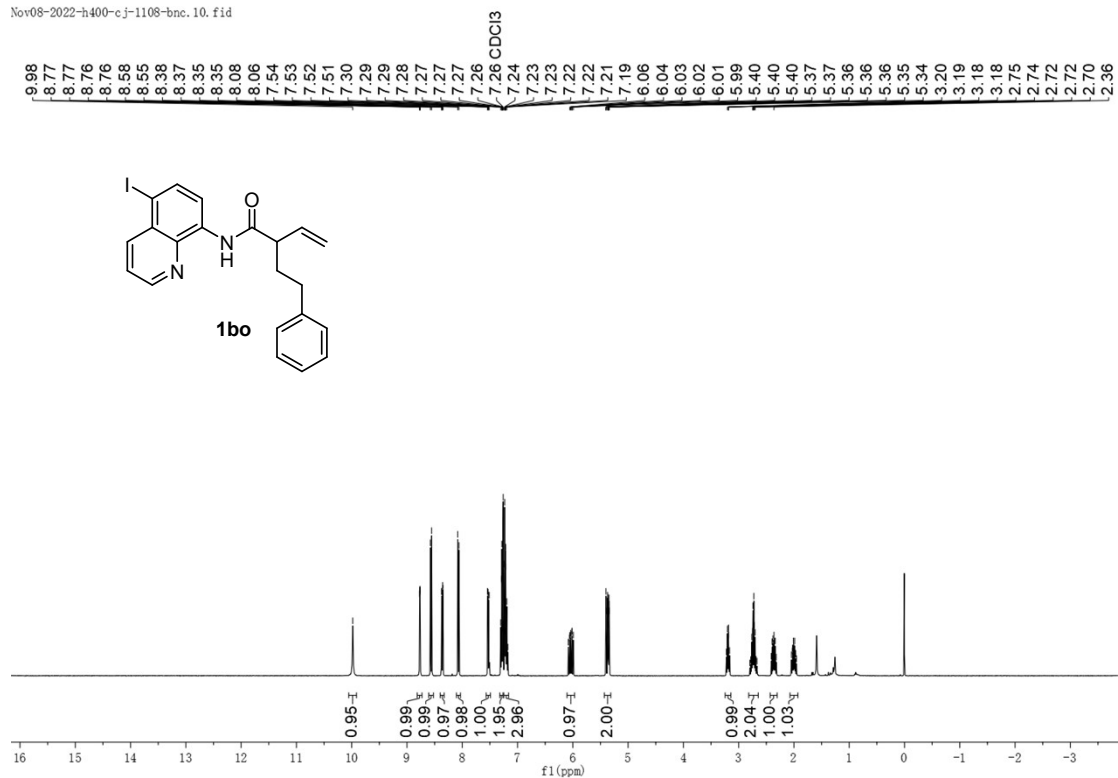

# <sup>13</sup>C NMR of 1bo (CDCl<sub>3</sub>, 101 MHz)

Nov08-2022-c400-c-j-1108-bnc.10.fid

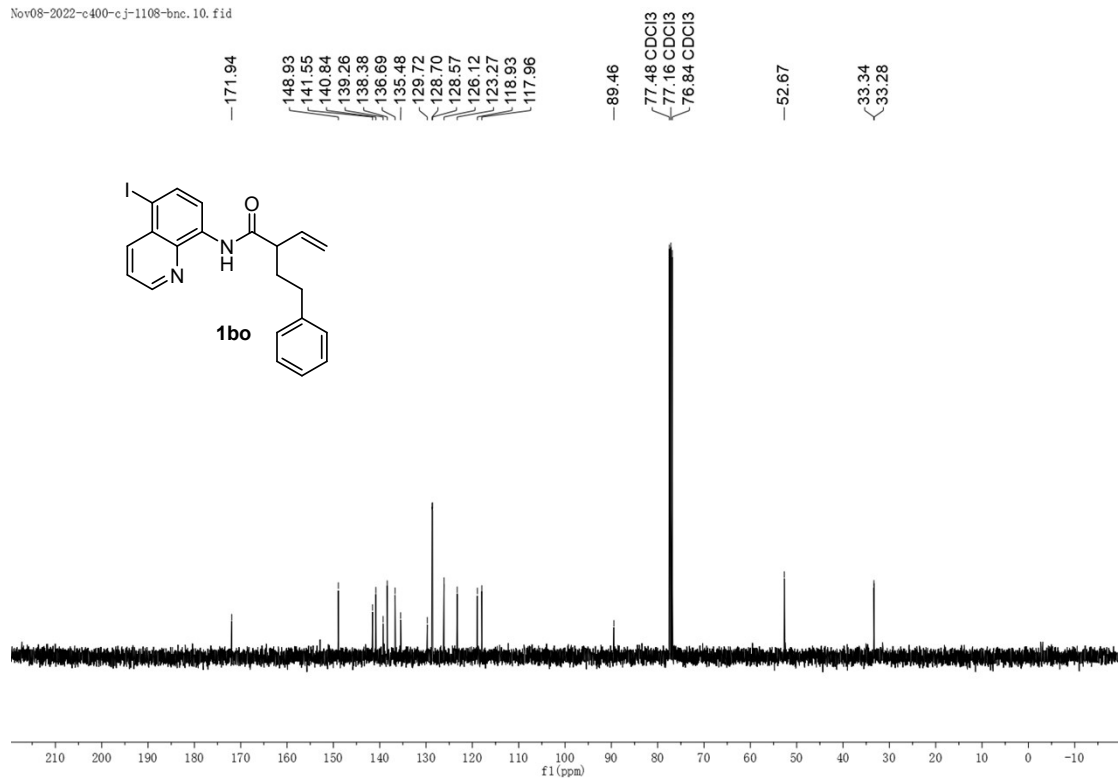

# <sup>1</sup>H NMR of 1bp (CDCl<sub>3</sub>, 400 MHz)

Oct11-2022-h400-cj-1011-2Me.10.fid

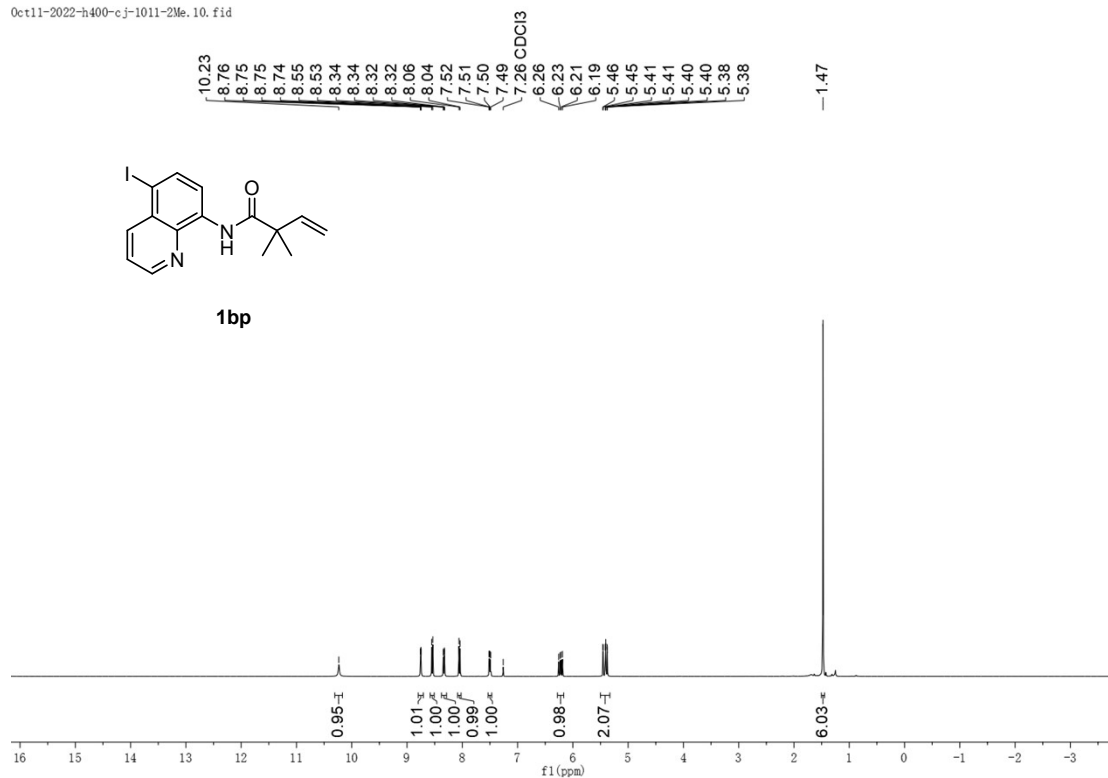

# <sup>13</sup>C NMR of 1bp (CDCl<sub>3</sub>, 101 MHz)

Oct11-2022-c400-cj-1011-2Me.10.fid

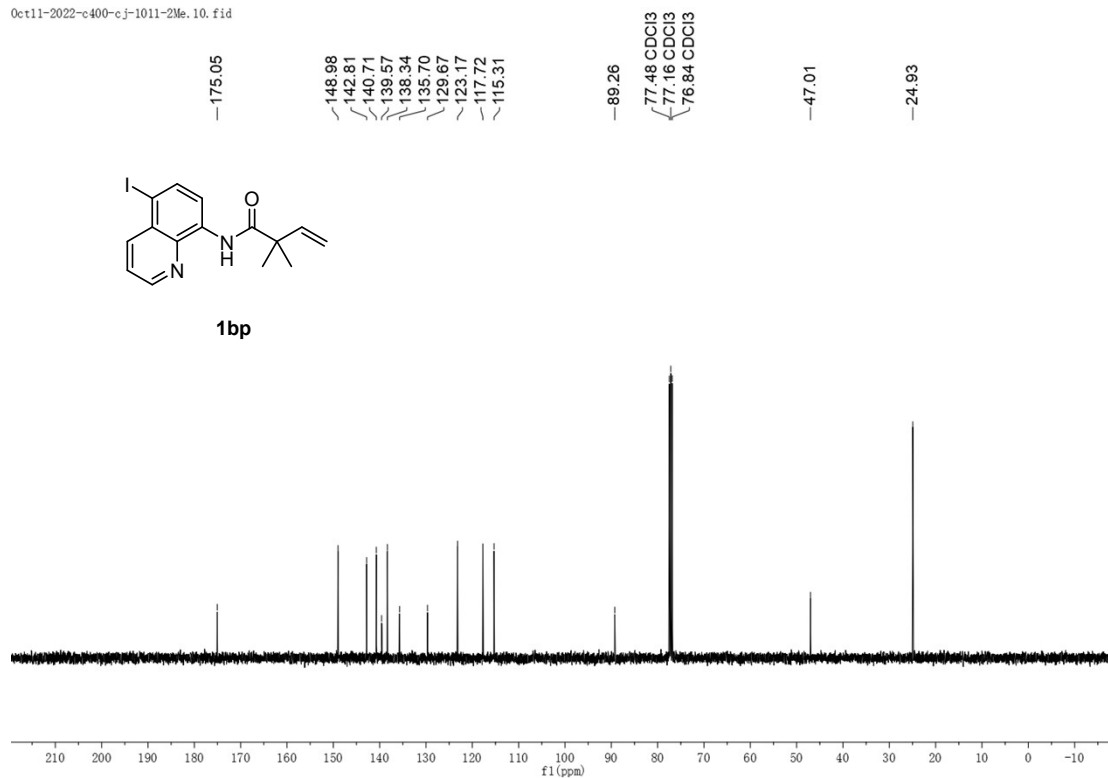



# <sup>1</sup>H NMR of 1bq (CDCl<sub>3</sub>, 400 MHz)

Nov17-2023-h400-cj-1117-me. 10. fid

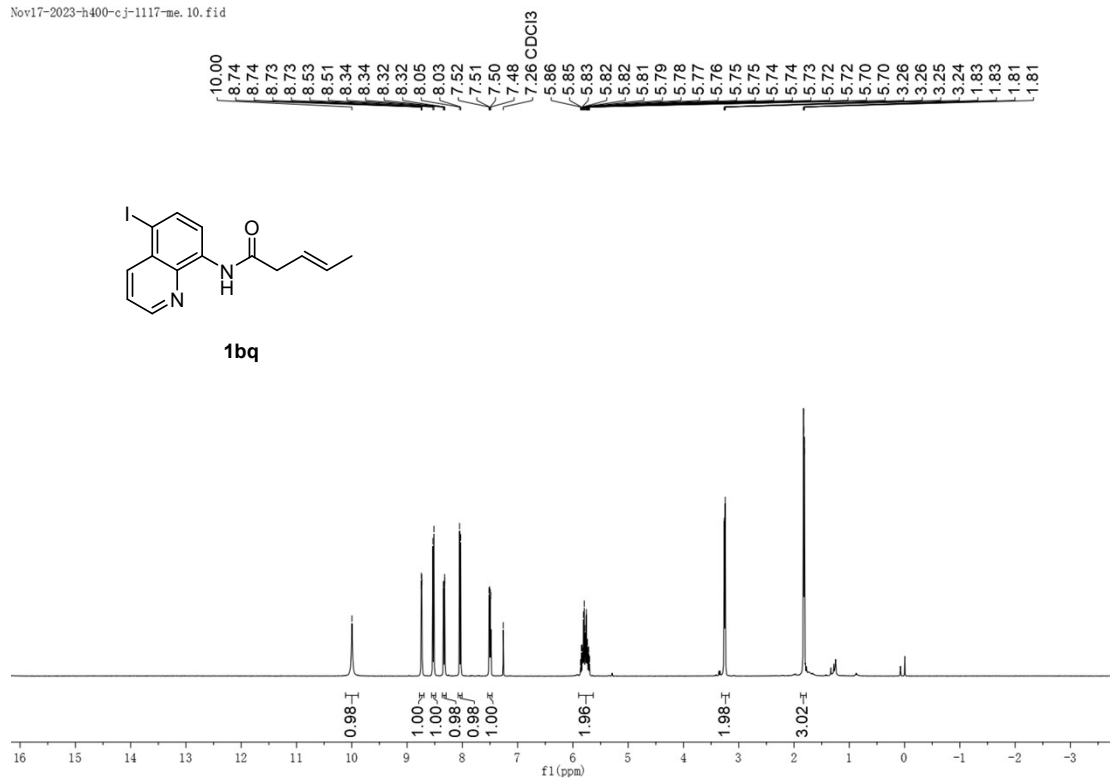

# <sup>13</sup>C NMR of 1bq (CDCl<sub>3</sub>, 101 MHz)

Nov21-2023-c400-cj-1117-me. 10. fid

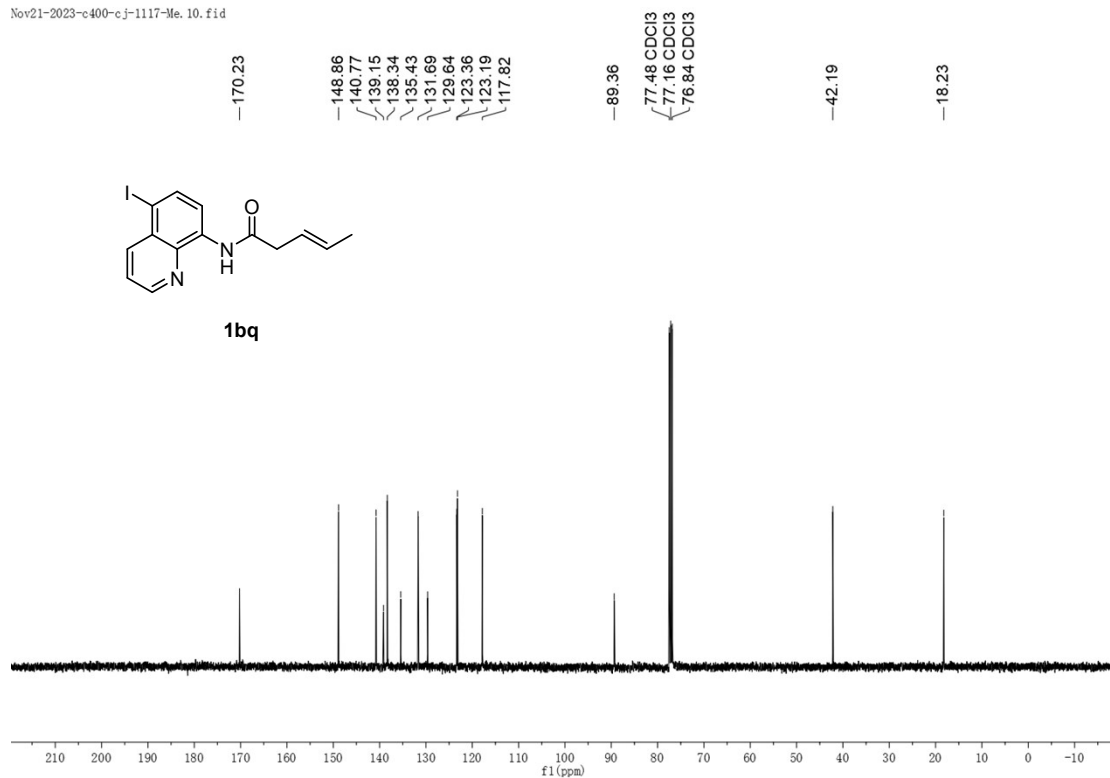

# <sup>1</sup>H NMR of 1br (CDCl<sub>3</sub>, 400 MHz)

Nov14-2023-h400-wxy-1107-Et2.10.fid

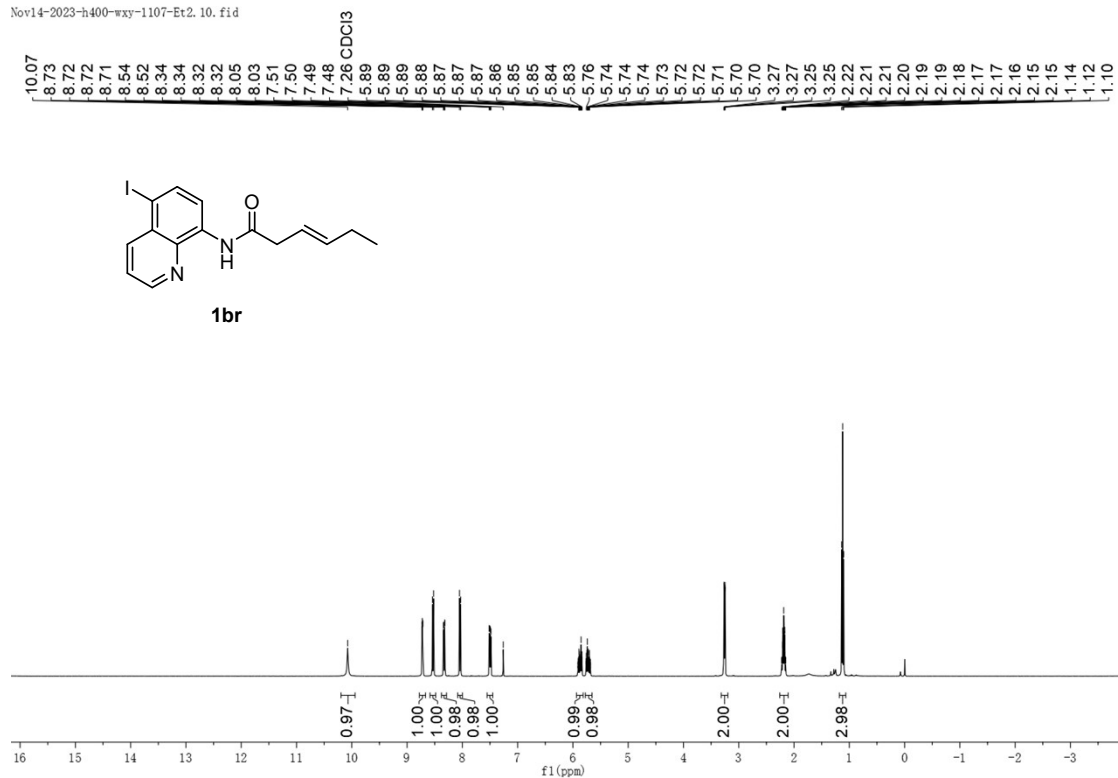

# <sup>13</sup>C NMR of 1br (CDCl<sub>3</sub>, 101 MHz)

Nov14-2023-h400-wxy-1107-Et2.11.fid

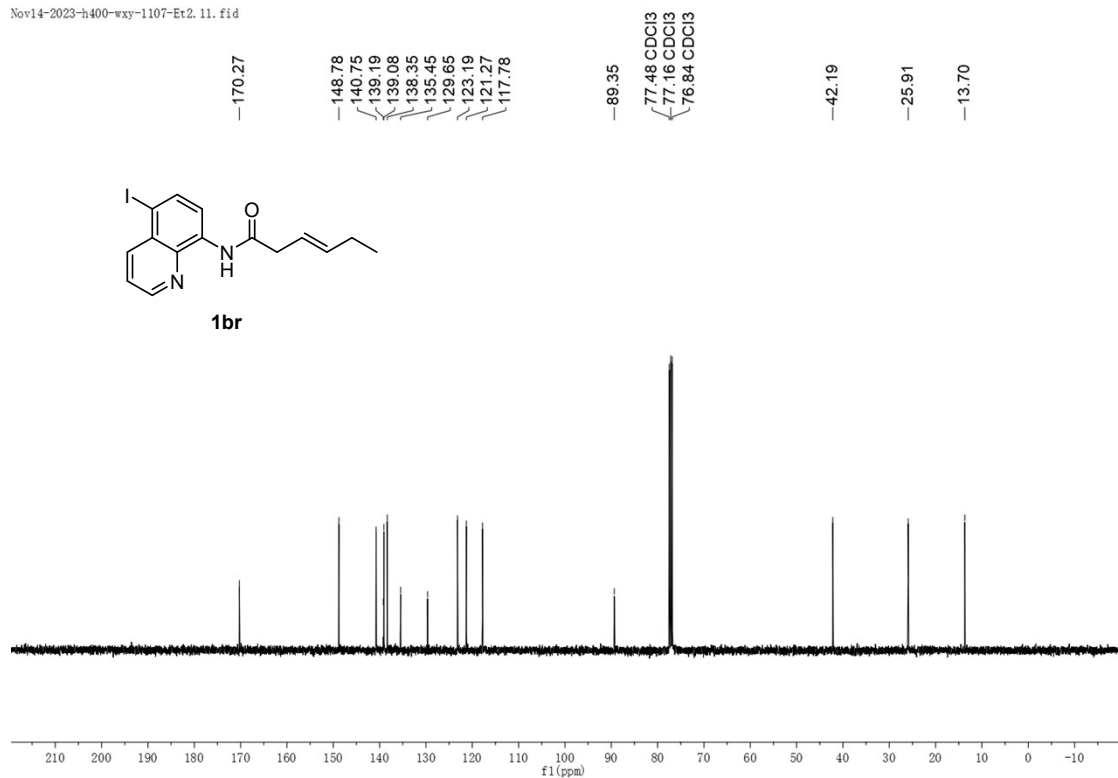

# <sup>1</sup>H NMR of 3'-AQ (CDCl<sub>3</sub>, 400 MHz)

Sep27-2023-h400-cj-0927-2.10.fid

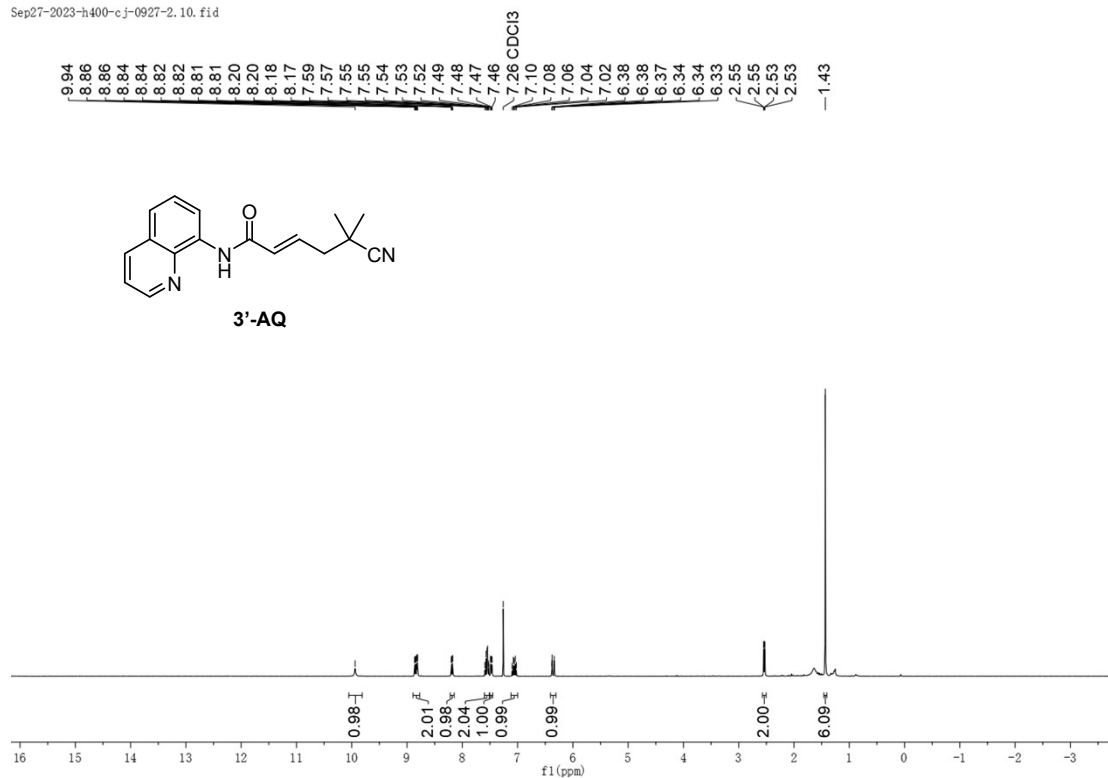

# <sup>13</sup>C NMR of 3'-AQ (CDCl<sub>3</sub>, 101 MHz)

Oct10-2023-c400-cj-0927-2.10.fid

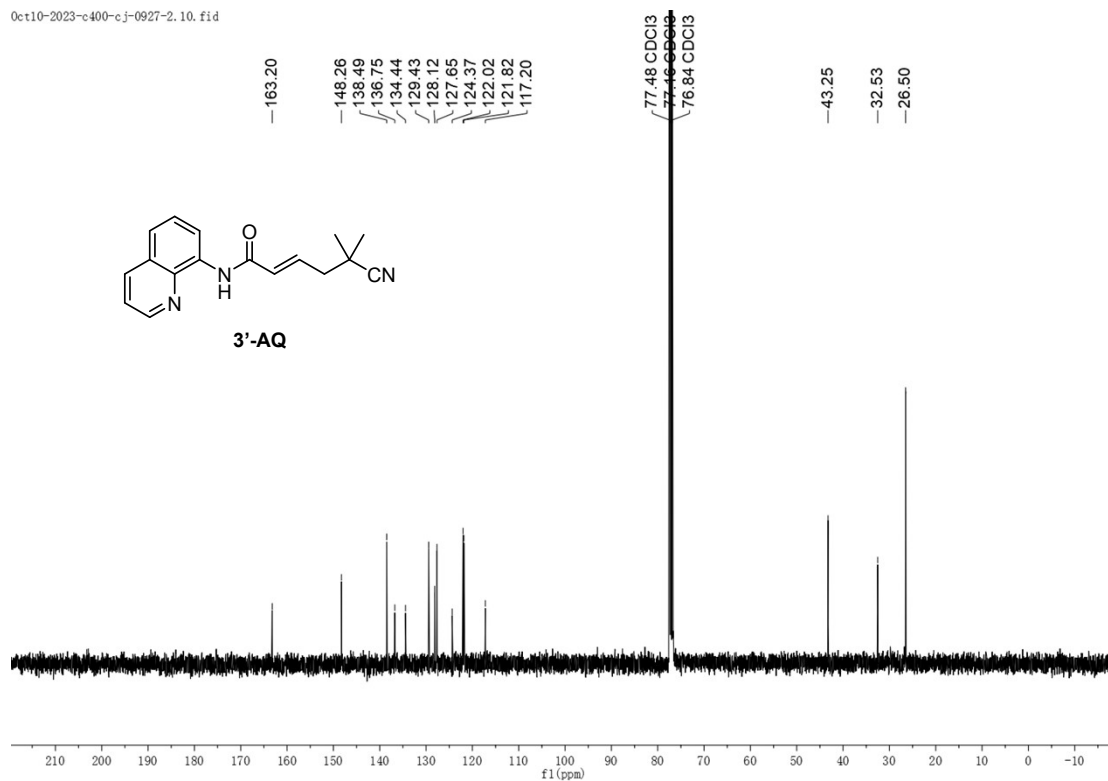

# <sup>1</sup>H NMR of 3aa (CDCl<sub>3</sub>, 400 MHz)

Jun30-2023-h400-cj-0630-34.10.fid

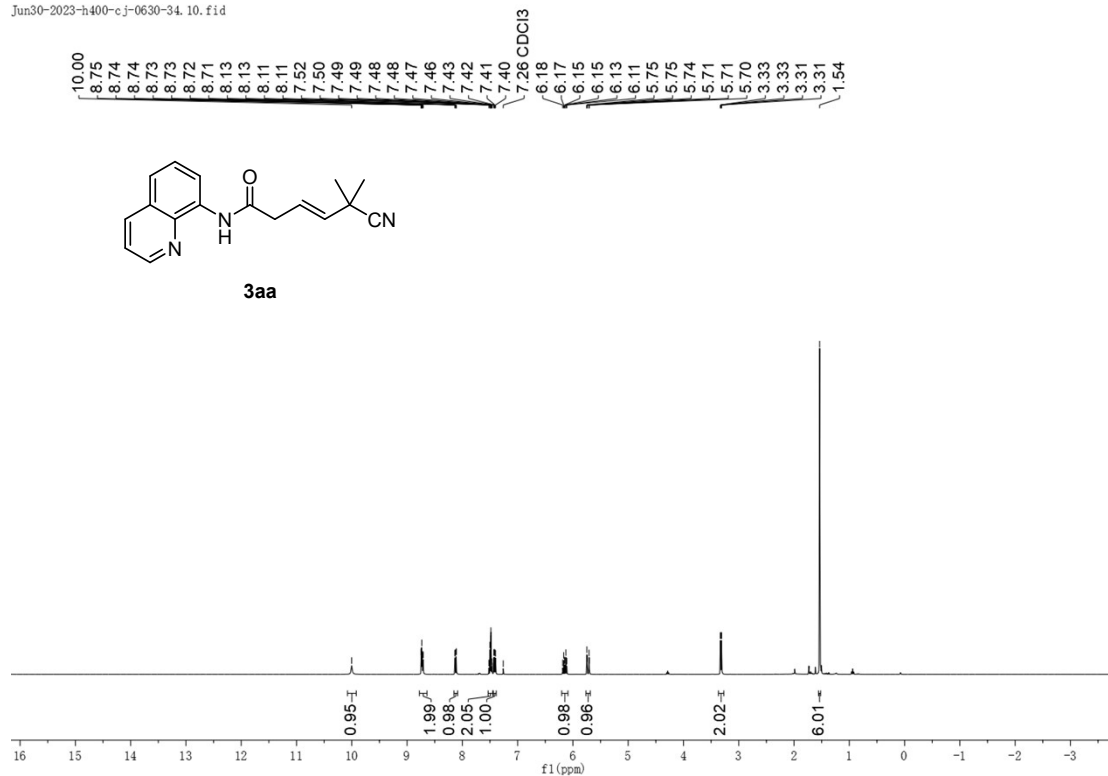

# <sup>13</sup>C NMR of 3aa (CDCl<sub>3</sub>, 101 MHz)

Jun30-2023-c400-cj-0630-34.11.fid

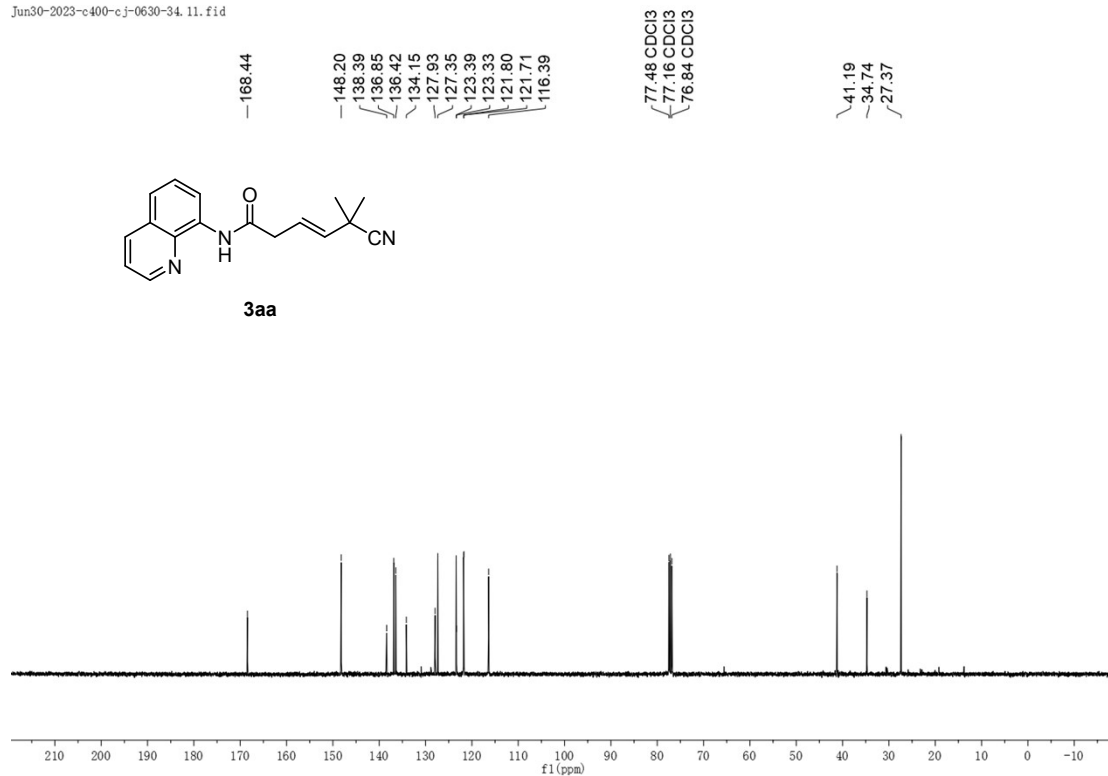

# <sup>1</sup>H NMR of 3ab (CDCl<sub>3</sub>, 400 MHz)

Jul24-2023-h400-cj-0724-36.10.fid

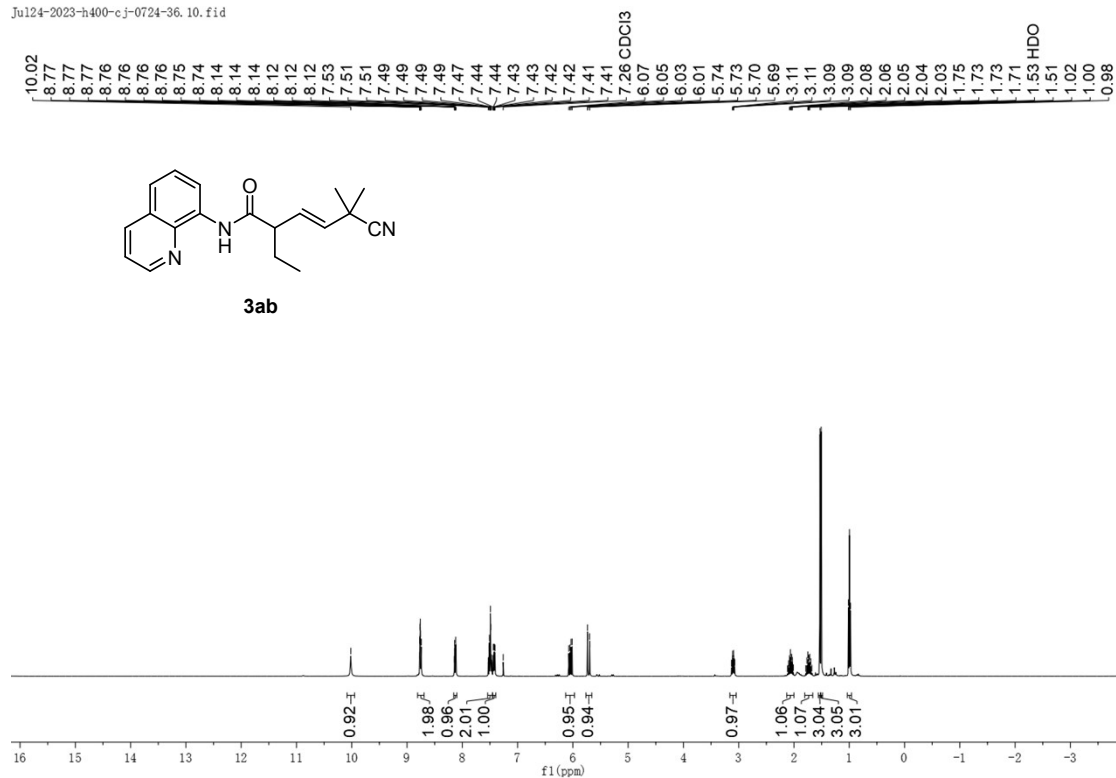

# <sup>13</sup>C NMR of 3ab (CDCl<sub>3</sub>, 101 MHz)

Jul24-2023-c400-cj-0724-36.11.fid

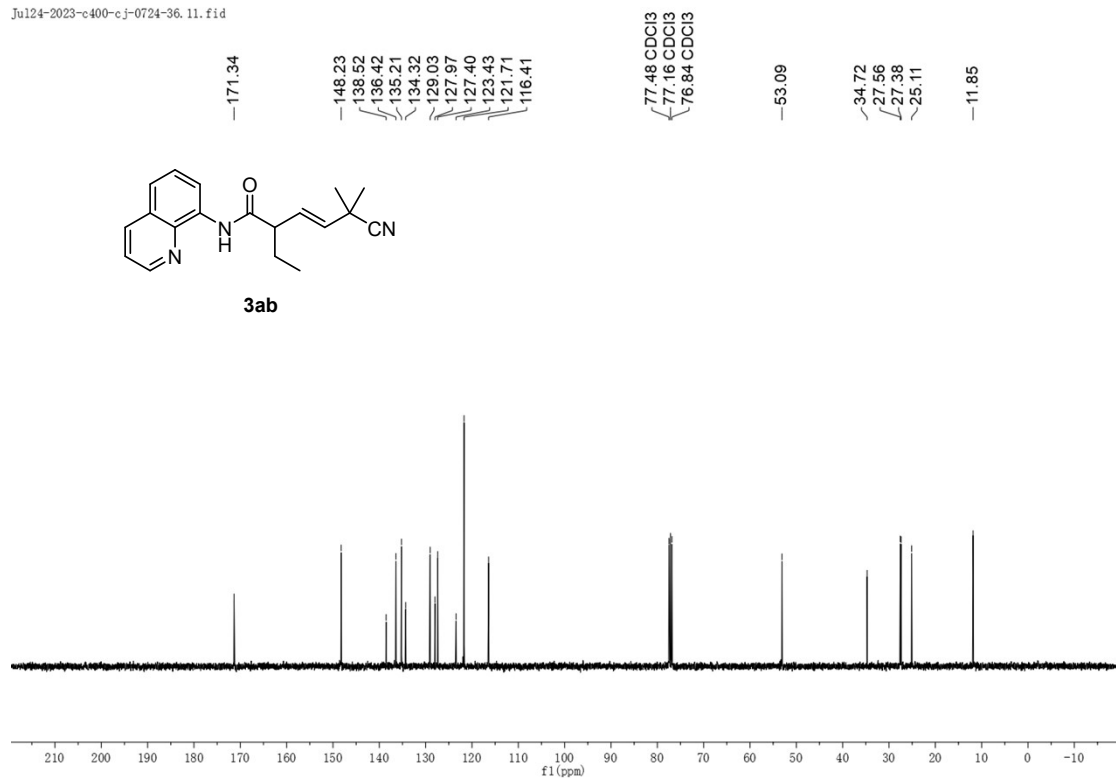

# <sup>1</sup>H NMR of 3ac (CDCl<sub>3</sub>, 400 MHz)

Sep13-2023-h400-cj-0913-JCN. 10. fid

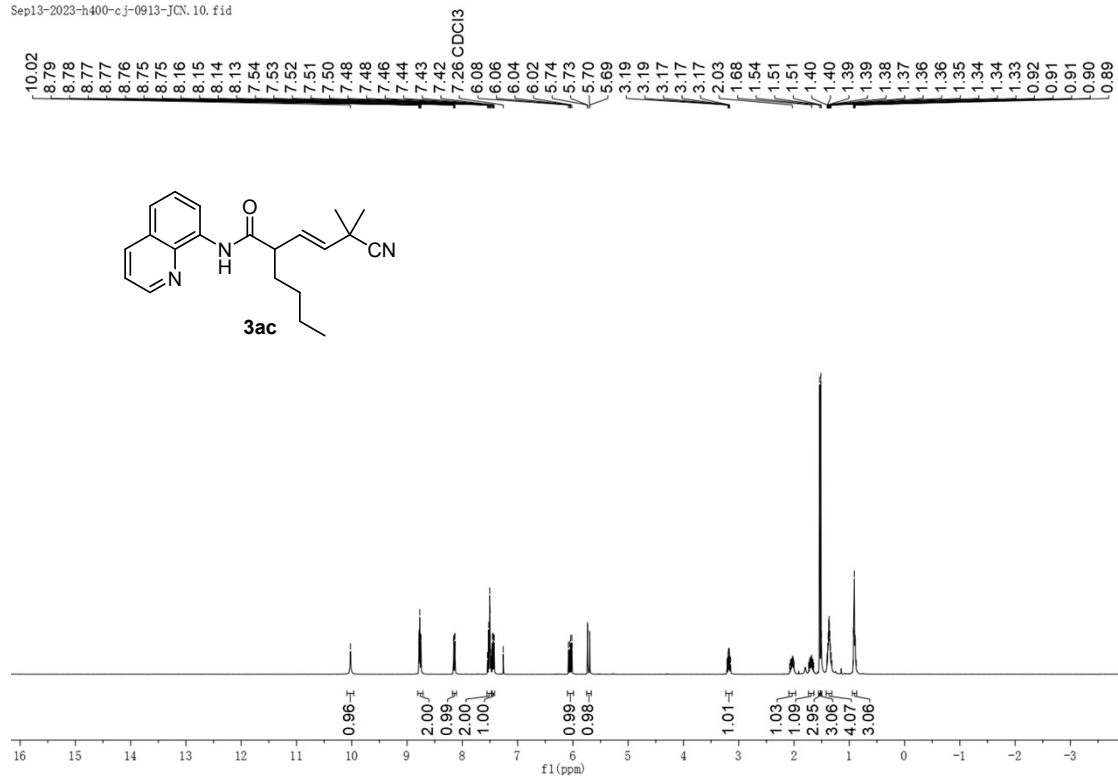

# <sup>13</sup>C NMR of 3ac (CDCl<sub>3</sub>, 101 MHz)

Sep13-2023-c400-cj-0913-JCN. 11. fid

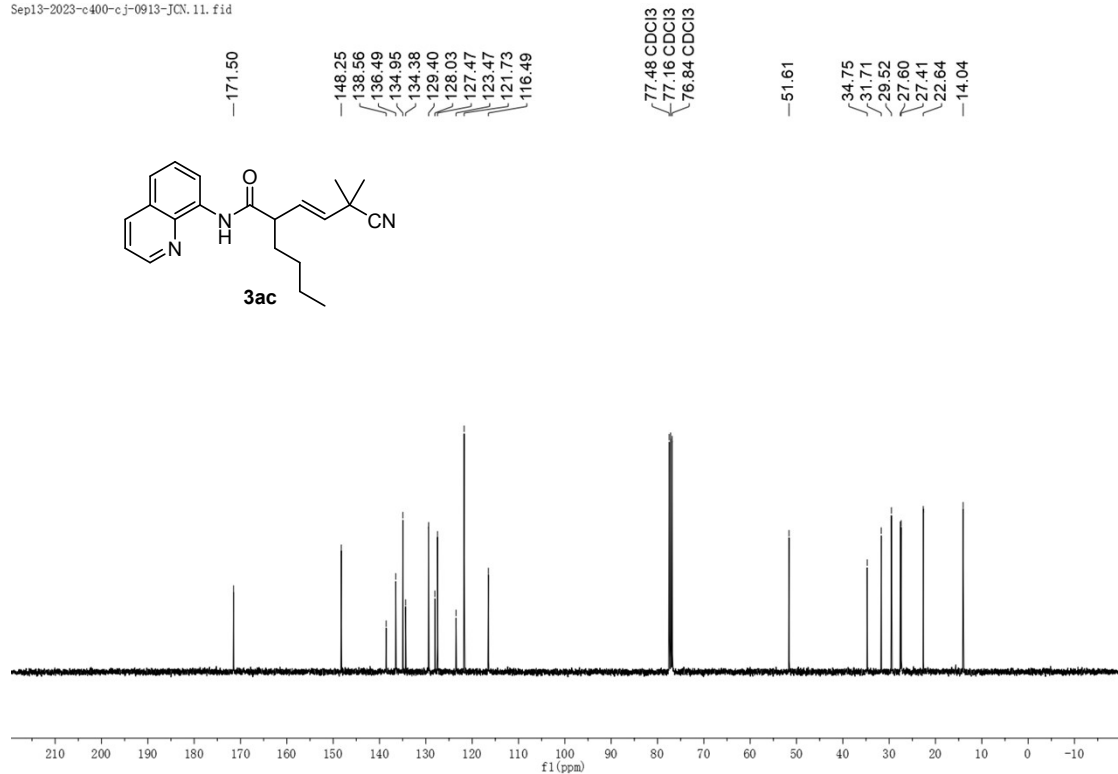

# <sup>1</sup>H NMR of 3ad (CDCl<sub>3</sub>, 400 MHz)

Jul24-2023-h400-cj-0724-46.10.fid

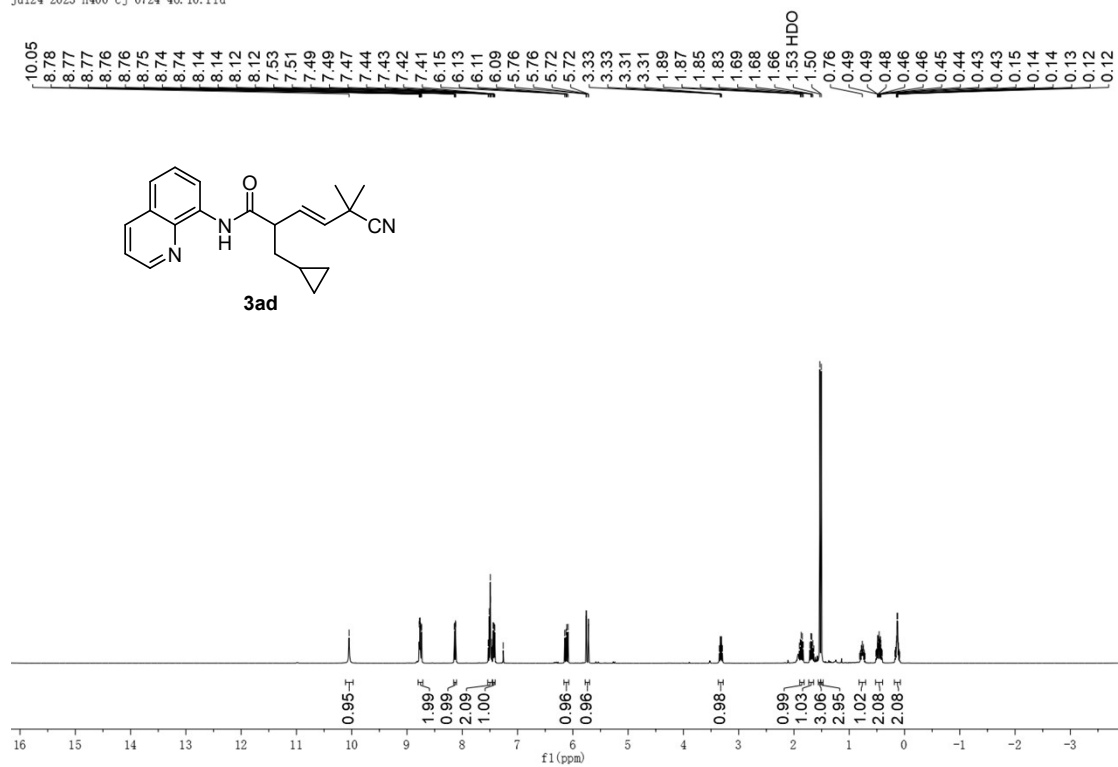

# <sup>13</sup>C NMR of 3ad (CDCl<sub>3</sub>, 101 MHz)

Jul25-2023-c400-cj-0724-46.10.fid

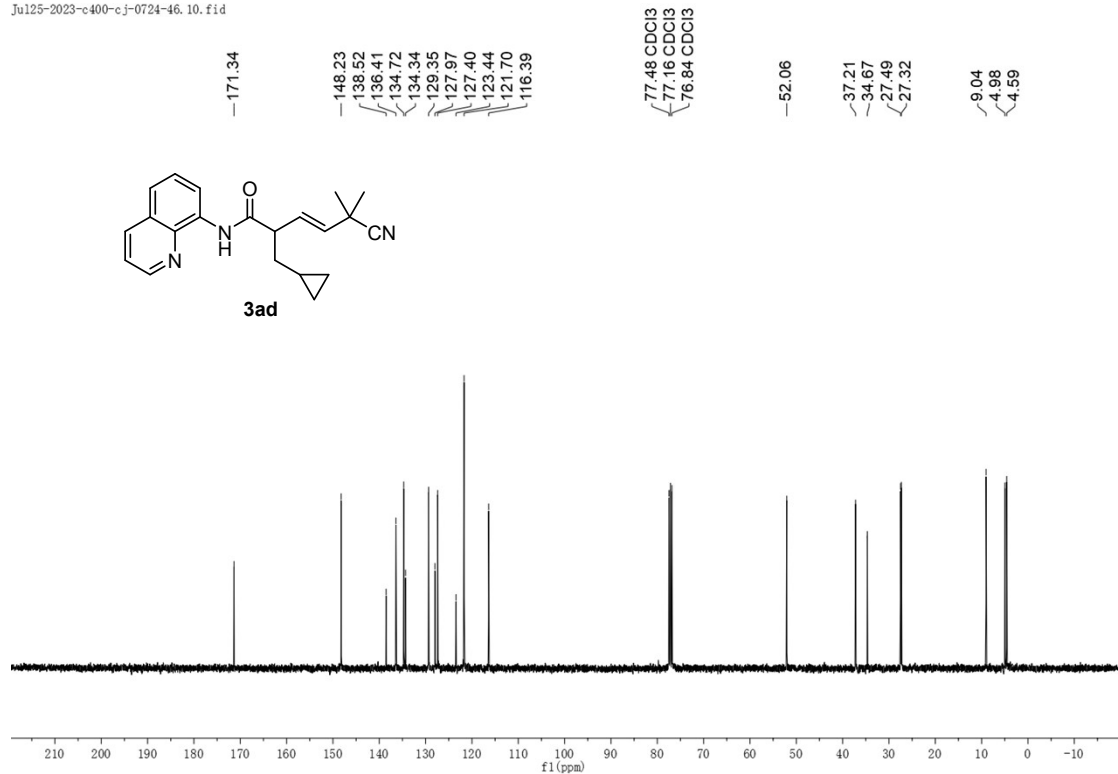

# <sup>1</sup>H NMR of 3ae (CDCl<sub>3</sub>, 400 MHz)

Ju105-2023-H400-cj-0705-47.10.fid

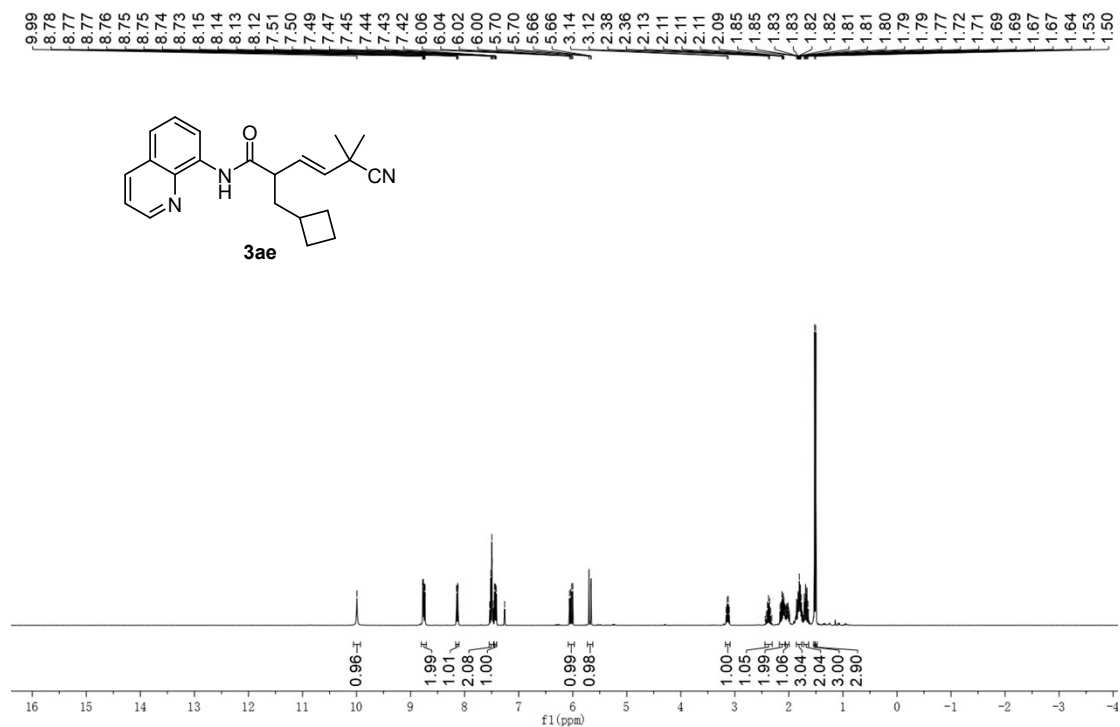

# <sup>13</sup>C NMR of 3ae (CDCl<sub>3</sub>, 101 MHz)

Ju106-2023-C400-cj-0705-47.10.fid

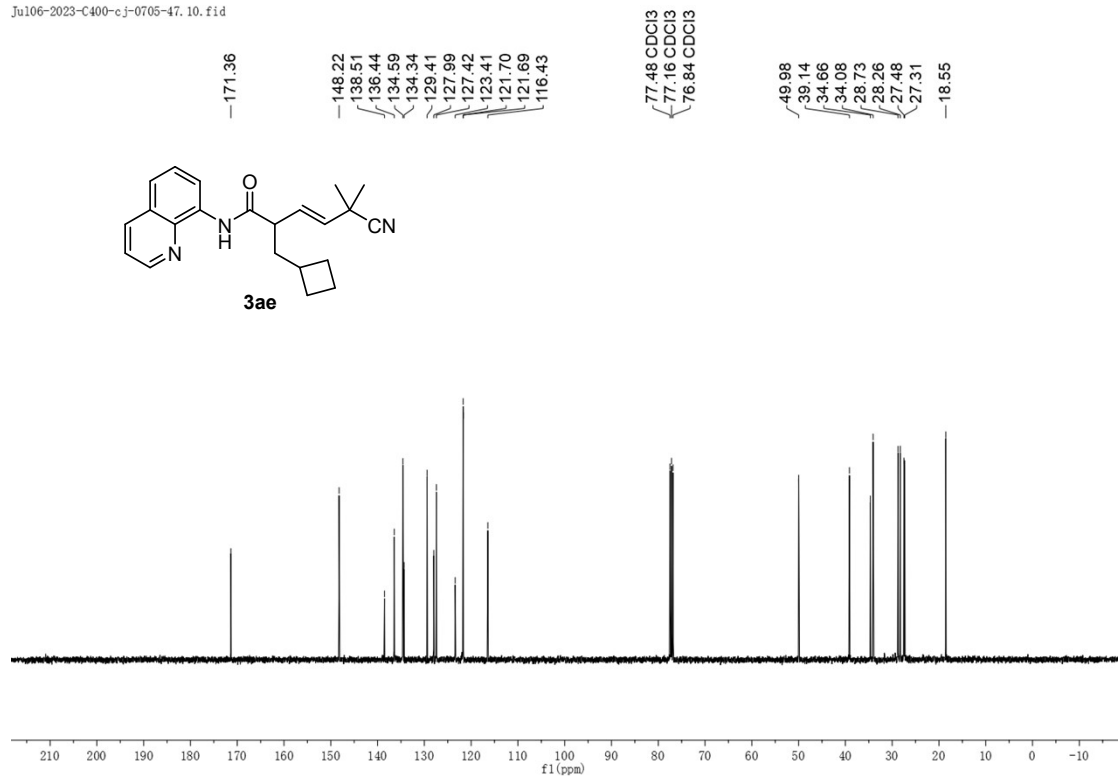



# <sup>1</sup>H NMR of 3af (CDCl<sub>3</sub>, 400 MHz)

Ju103-2023-h400-cj-0703-37.10.fid

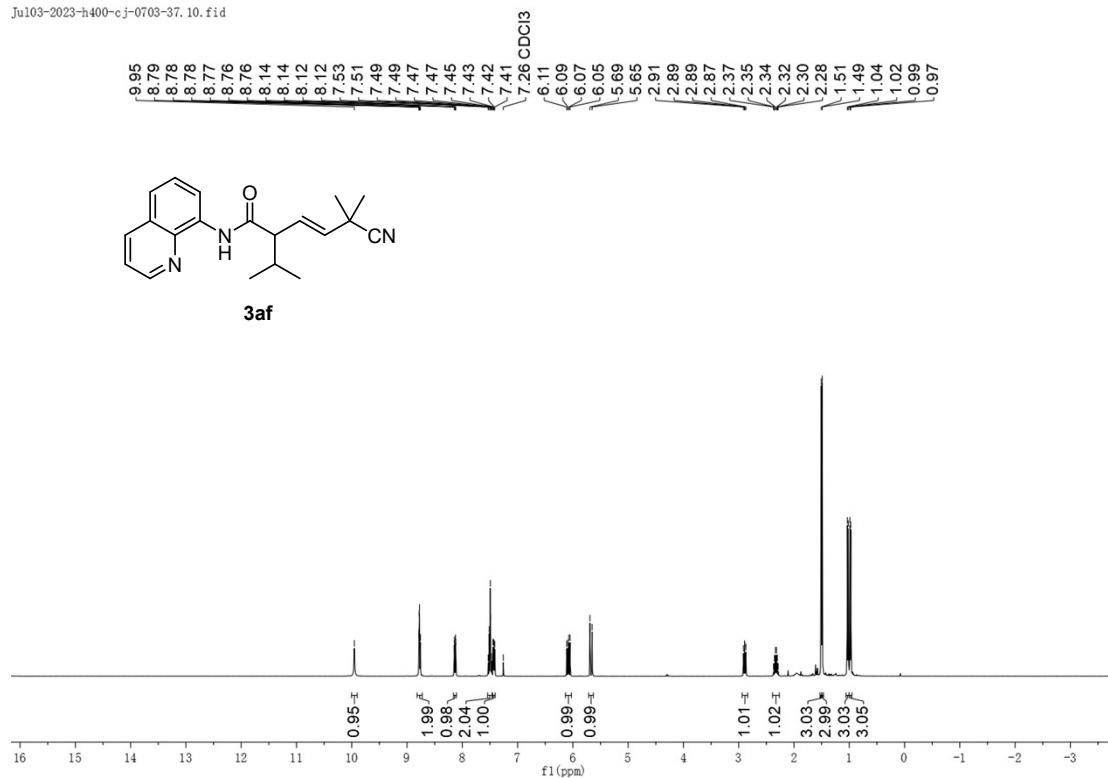

# <sup>13</sup>C NMR of 3af (CDCl<sub>3</sub>, 101 MHz)

Ju103-2023-c400-cj-0703-37.11.fid

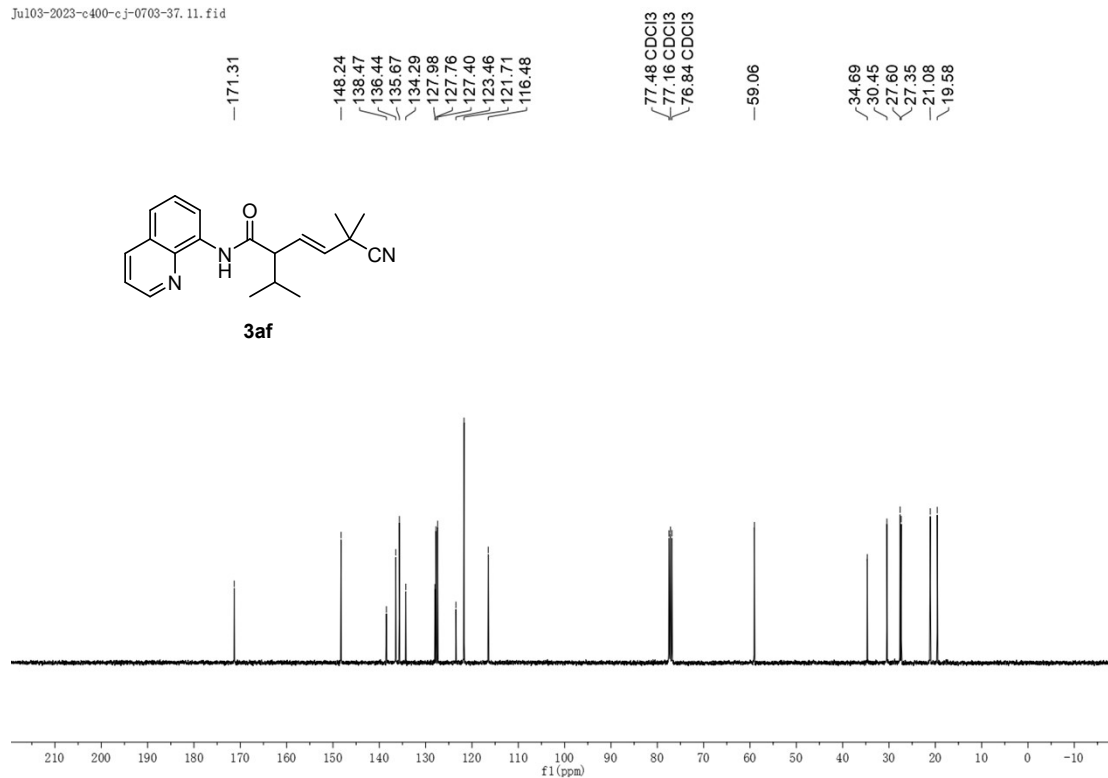

# <sup>1</sup>H NMR of 3ag (CDCl<sub>3</sub>, 400 MHz)

Sep08-2023-H400-cj-0908-56.10.fid

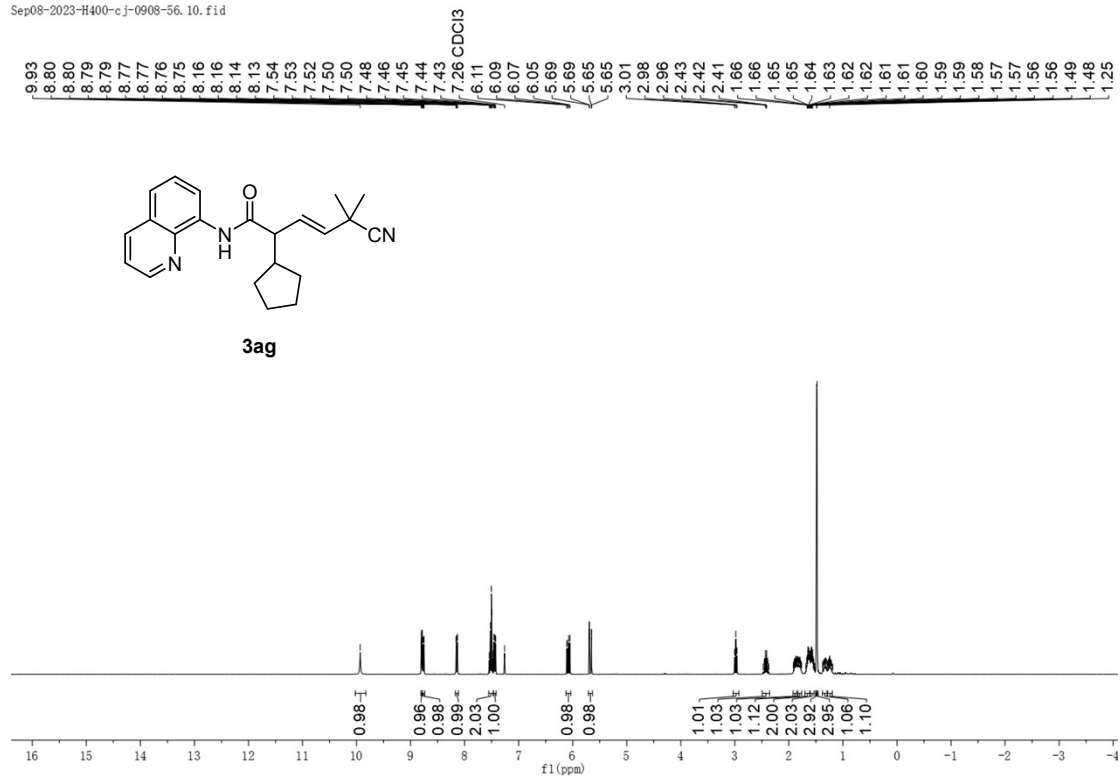

# <sup>13</sup>C NMR of 3ag (CDCl<sub>3</sub>, 101 MHz)

Sep08-2023-C400-cj-0908-56.11.fid

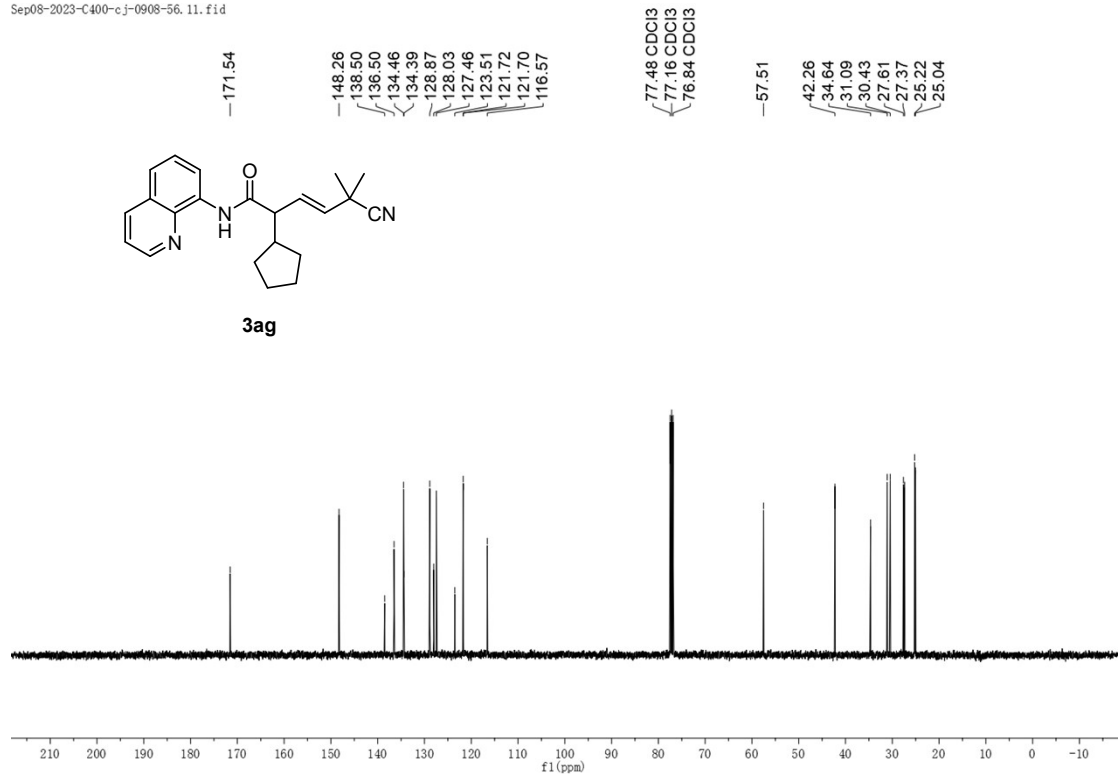



### $^1\text{H}$ NMR of 3ai (CDCl<sub>3</sub>, 400 MHz)

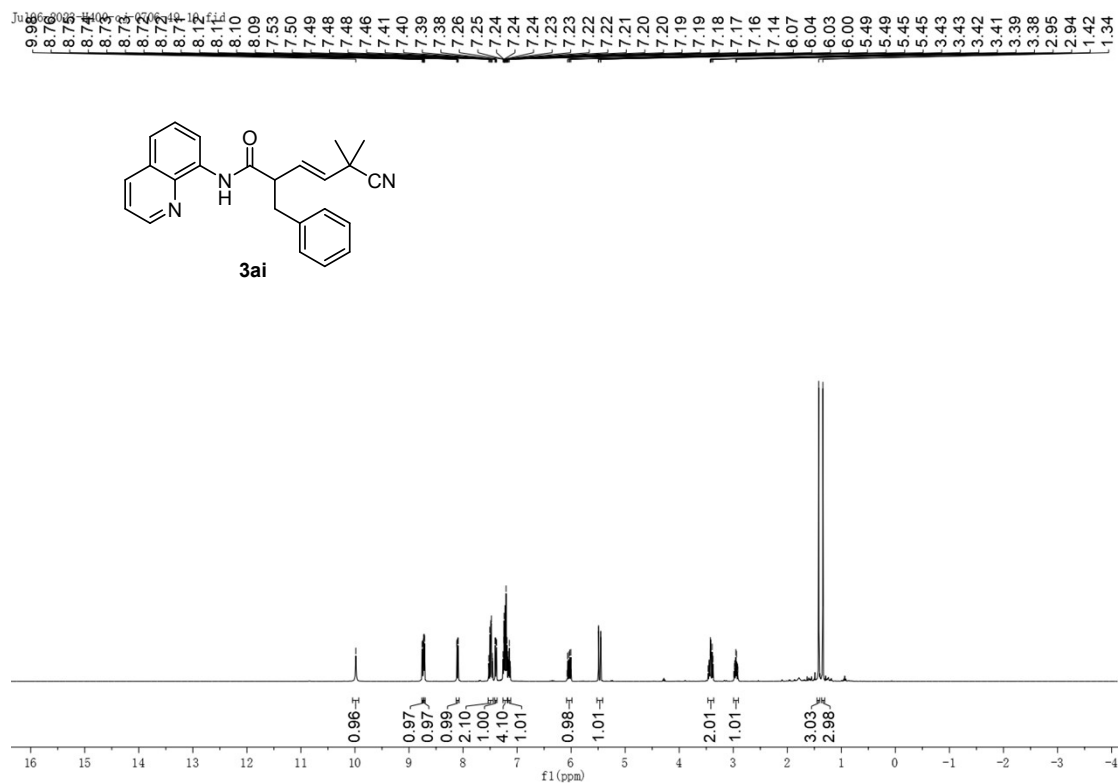

### $^{13}\text{C}$ NMR of 3ai (CDCl<sub>3</sub>, 101 MHz)

Jul07-2023-c400-cj-0706-49.10.fid

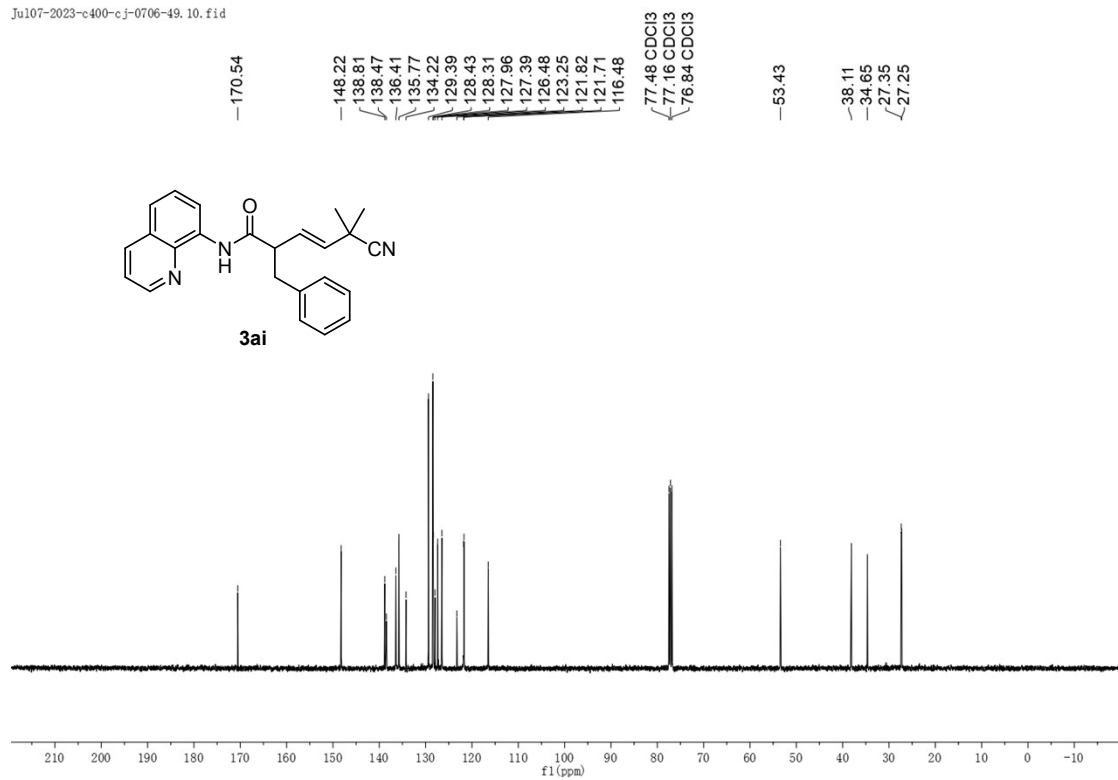

# <sup>1</sup>H NMR of 3aj (CDCl<sub>3</sub>, 400 MHz)

Jul07-2023-h400-cj-0706-50.10.fid

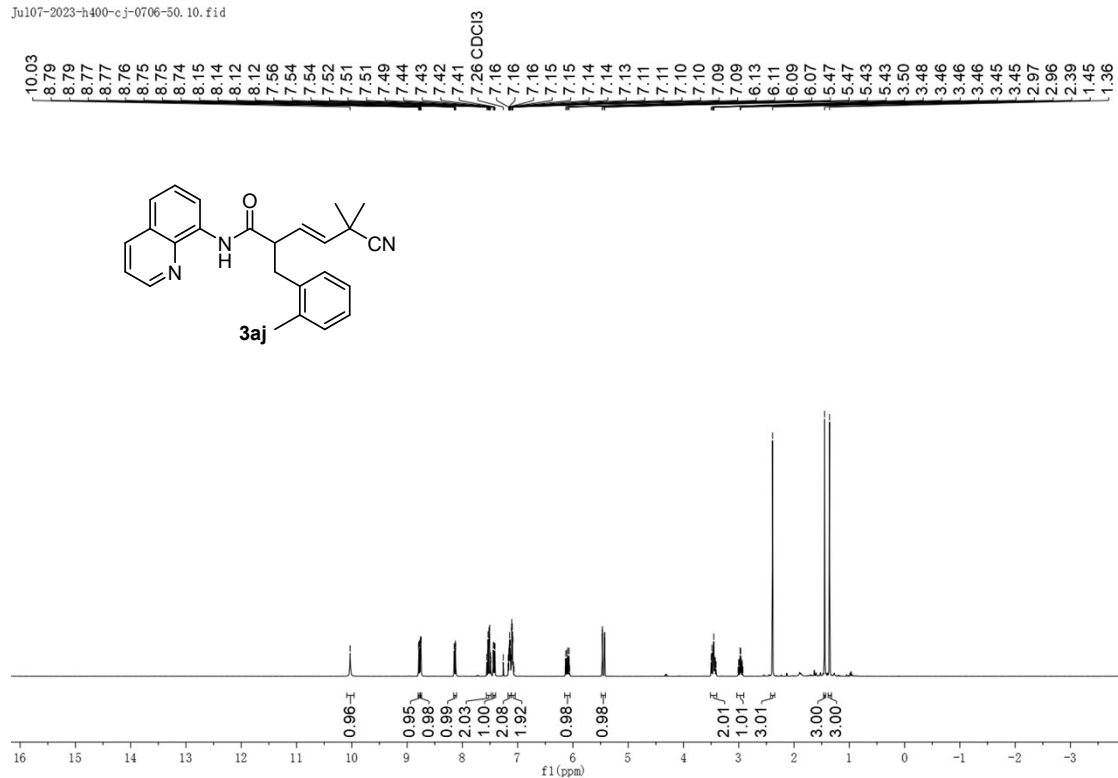

# <sup>13</sup>C NMR of 3aj (CDCl<sub>3</sub>, 101 MHz)

Jul07-2023-c400-cj-0706-50.11.fid

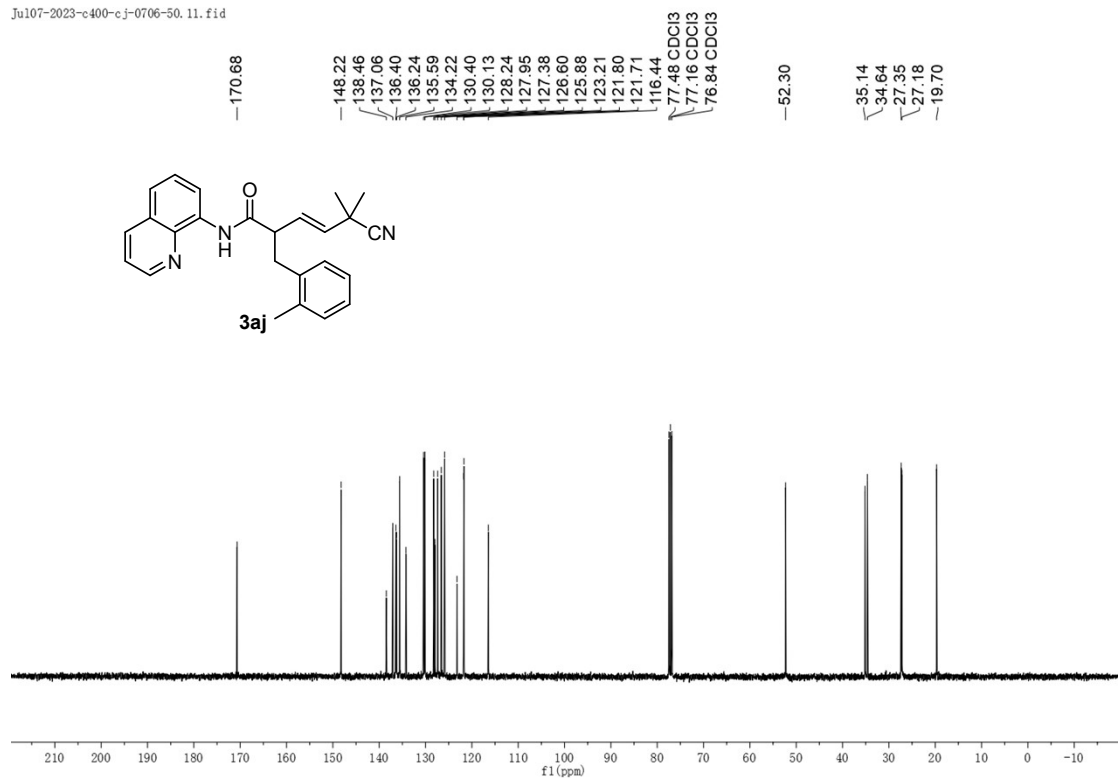

# <sup>1</sup>H NMR of 3ak (CDCl<sub>3</sub>, 400 MHz)

Jul19-2023-H400-cj-0719-51.10.fid

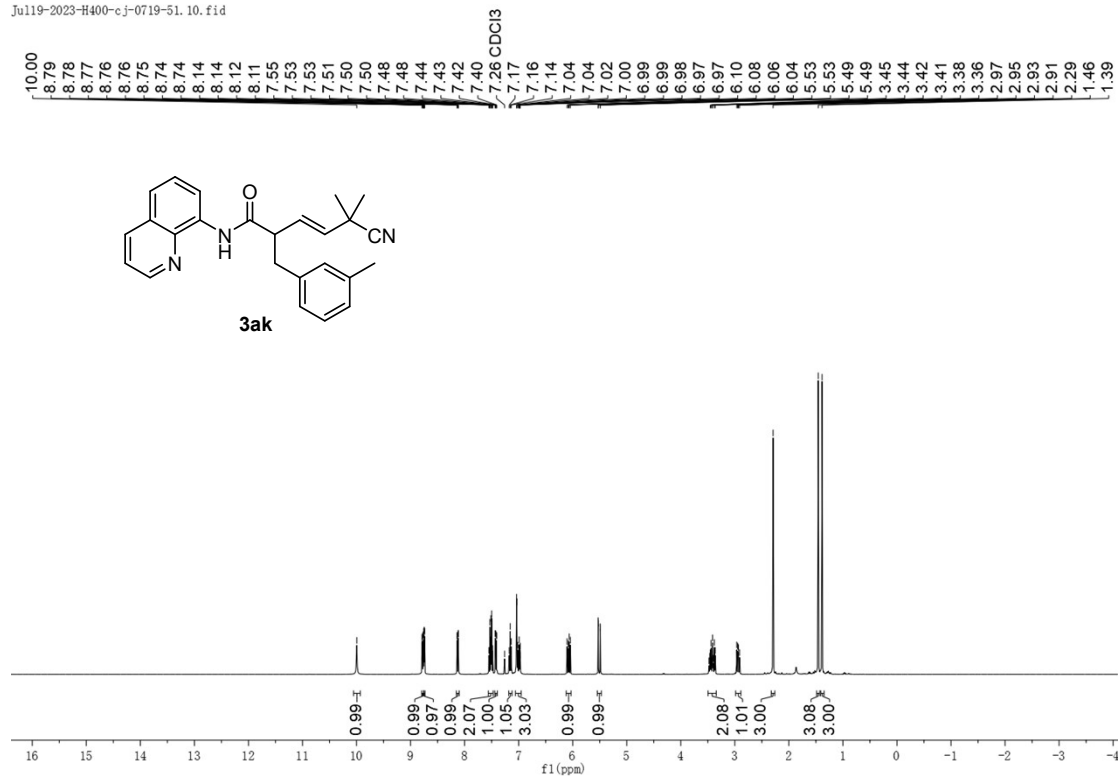

# <sup>13</sup>C NMR of 3ak (CDCl<sub>3</sub>, 101 MHz)

Jul19-2023-C400-cj-0719-51.11.fid

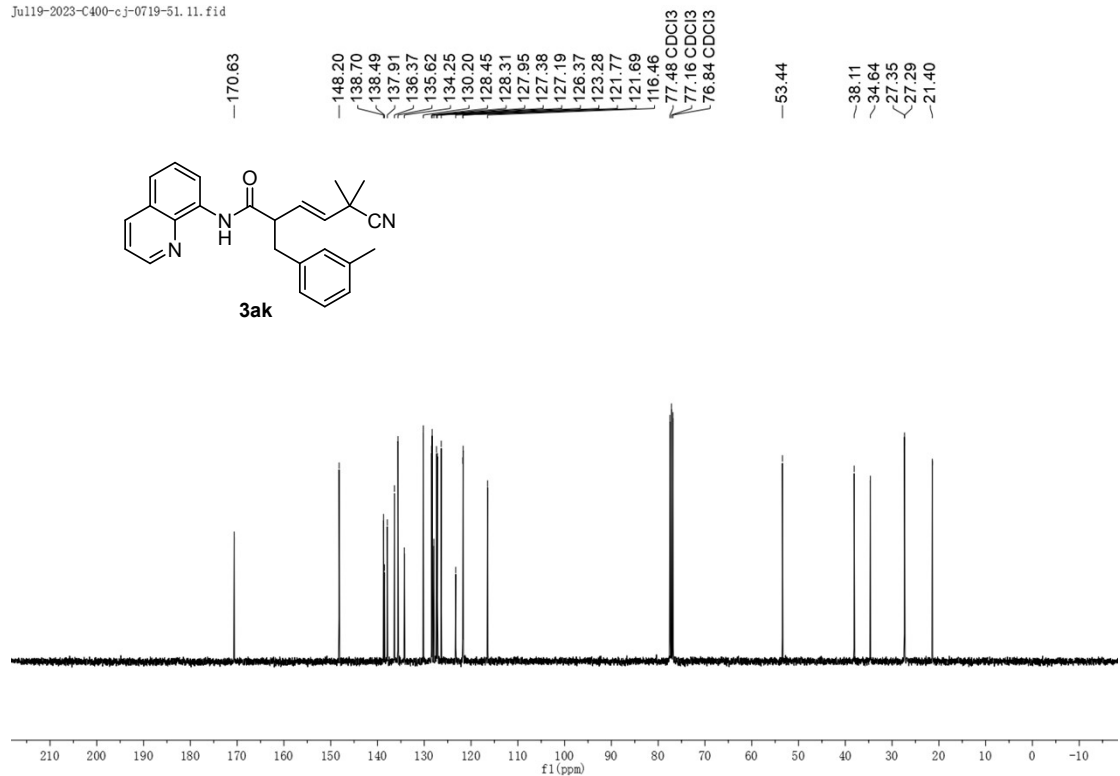

# <sup>1</sup>H NMR of 3al (CDCl<sub>3</sub>, 400 MHz)

Jul21-2023-h400-cj-0721-52.10.fid

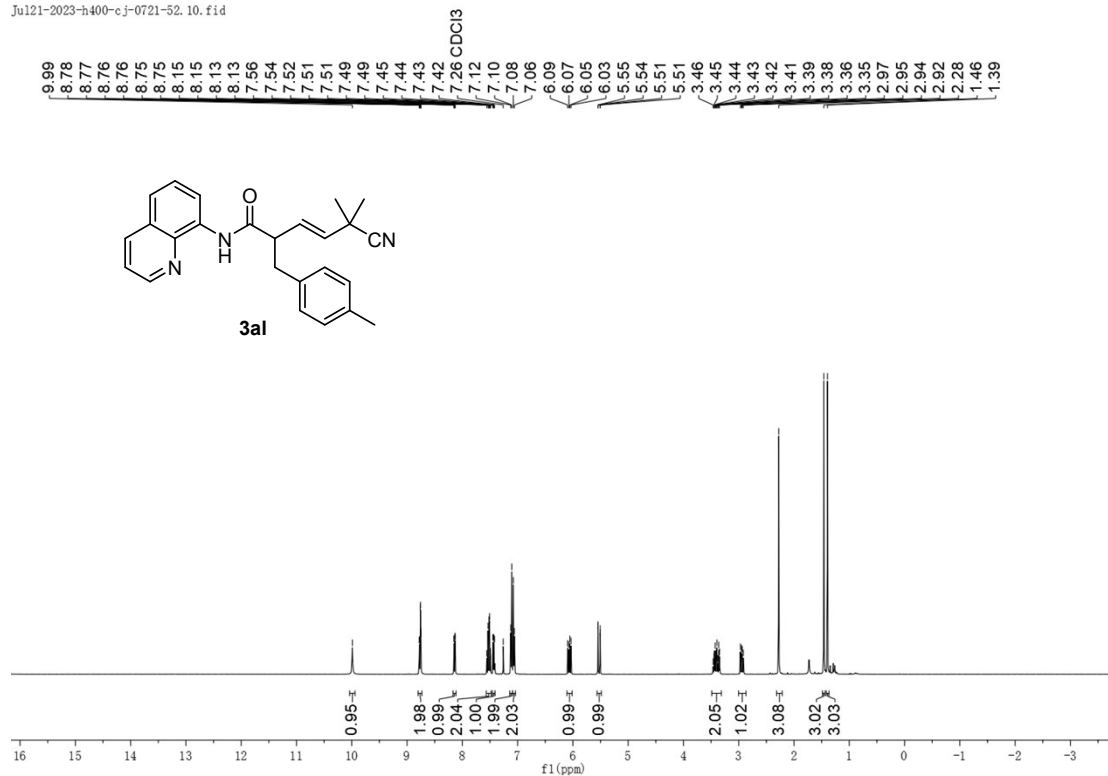

# <sup>13</sup>C NMR of 3al (CDCl<sub>3</sub>, 101 MHz)

Jul21-2023-c400-cj-0721-52.11.fid

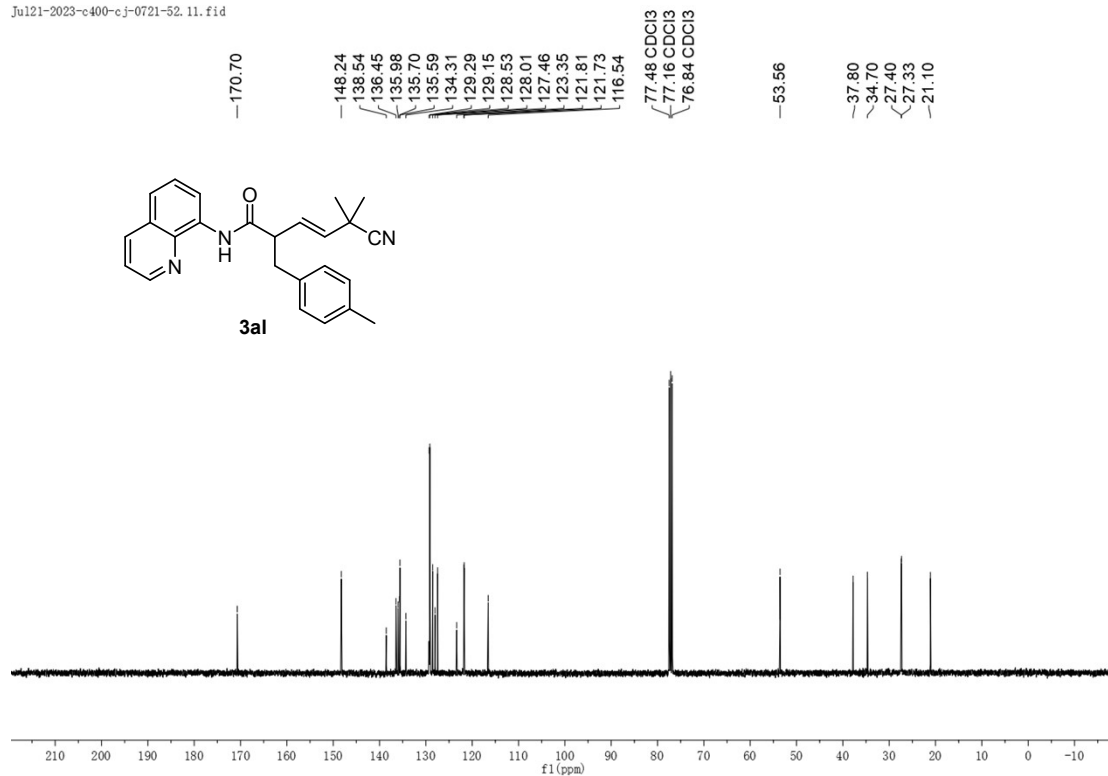

# <sup>1</sup>H NMR of 3am (CDCl<sub>3</sub>, 400 MHz)

Jul17-2023-h400-cj-0717-57.10.fid

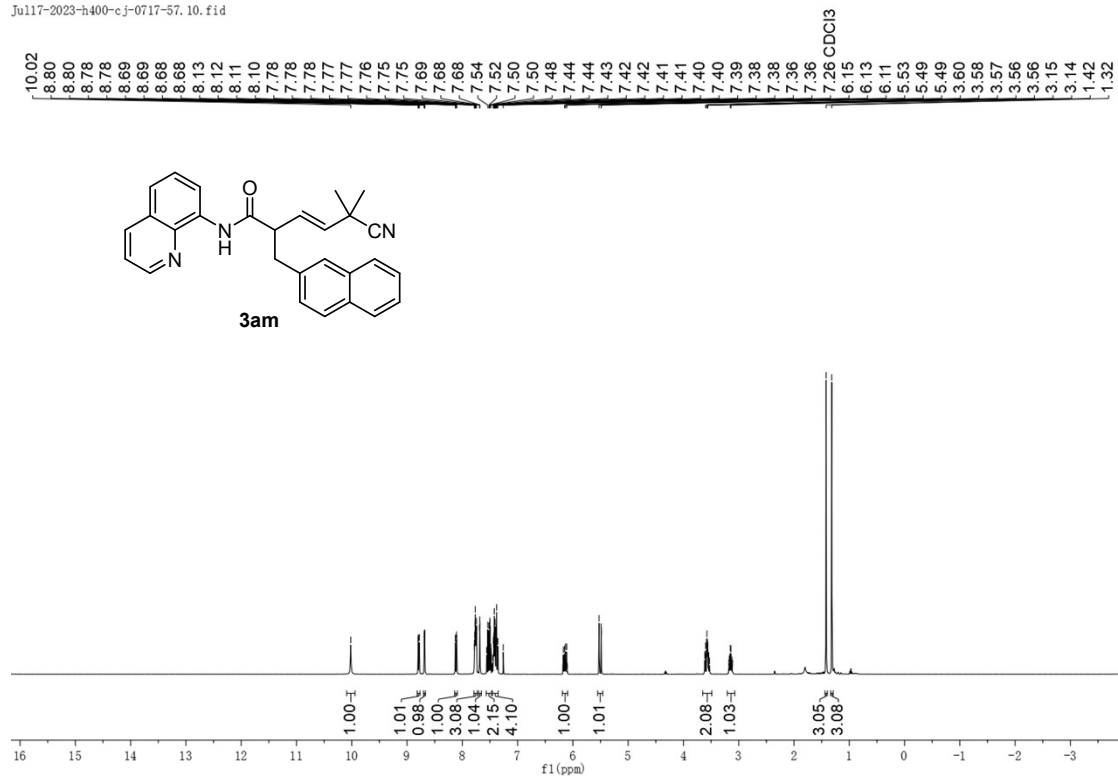

# <sup>13</sup>C NMR of 3am (CDCl<sub>3</sub>, 101 MHz)

Jul17-2023-c400-cj-0717-57.11.fid

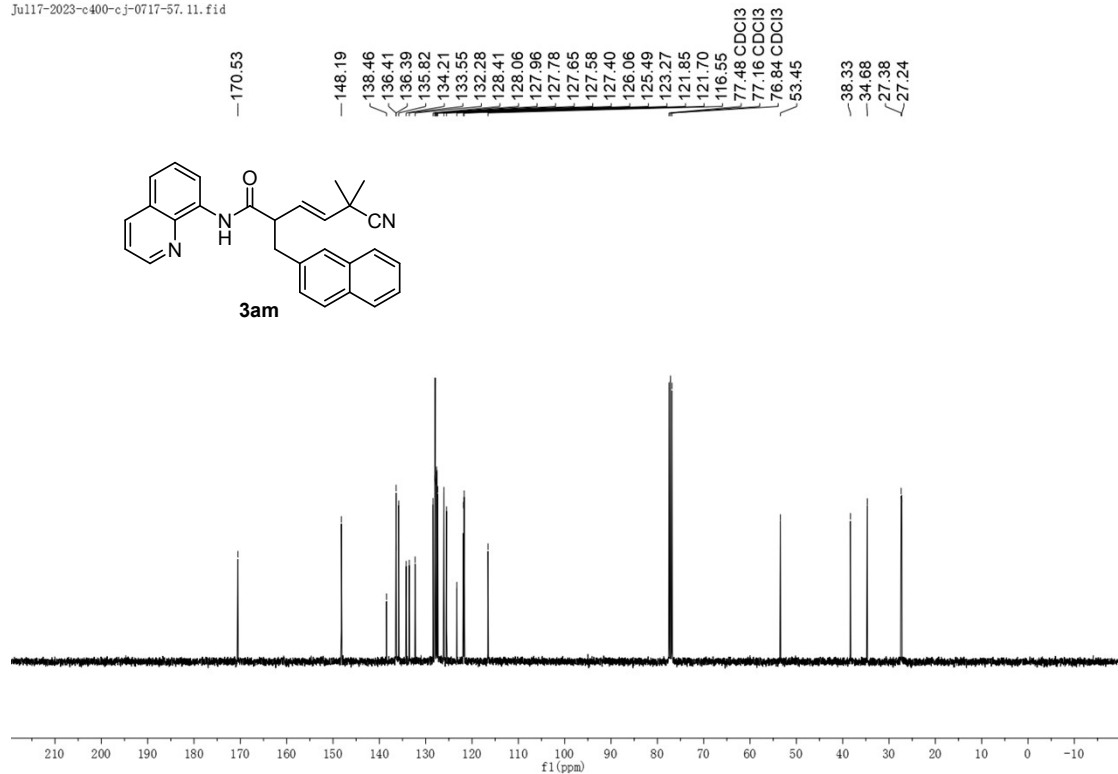



# <sup>1</sup>H NMR of 3an (CDCl<sub>3</sub>, 400 MHz)

Jul11-2023-h400-cj-0710-53.10.fid

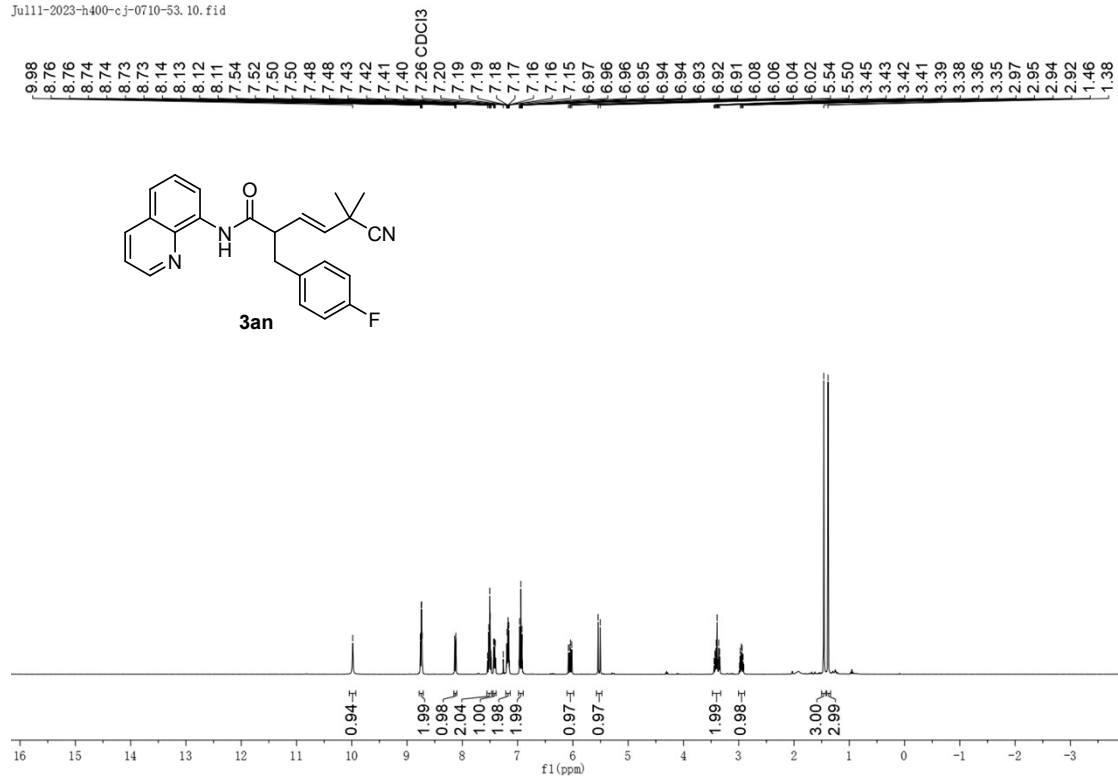

# <sup>13</sup>C NMR of 3an (CDCl<sub>3</sub>, 101 MHz)

Jul11-2023-c400-cj-0710-53.11.fid

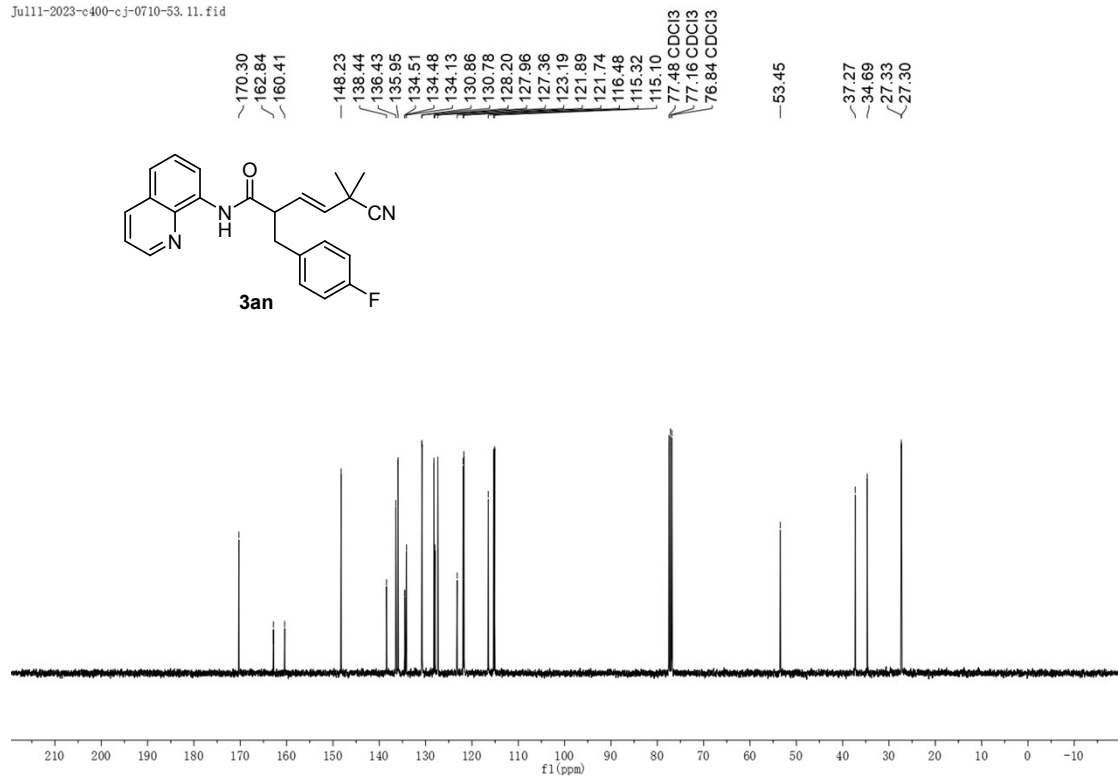

# <sup>19</sup>F NMR of 3an (CDCl<sub>3</sub>, 376 MHz)

Nov21-2023-F400-cj-1120-53.10.fid

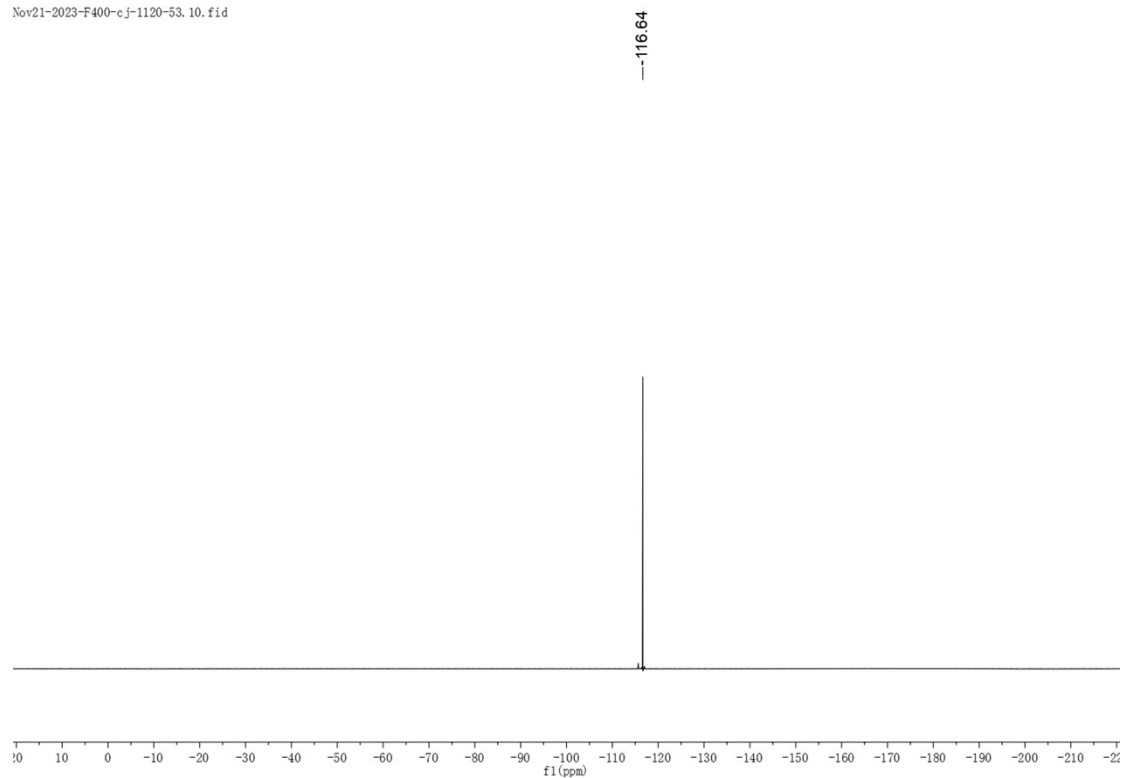

# <sup>1</sup>H NMR of 3ao (CDCl<sub>3</sub>, 400 MHz)

Jul12-2023-H400-cj-0712-54.10.fid

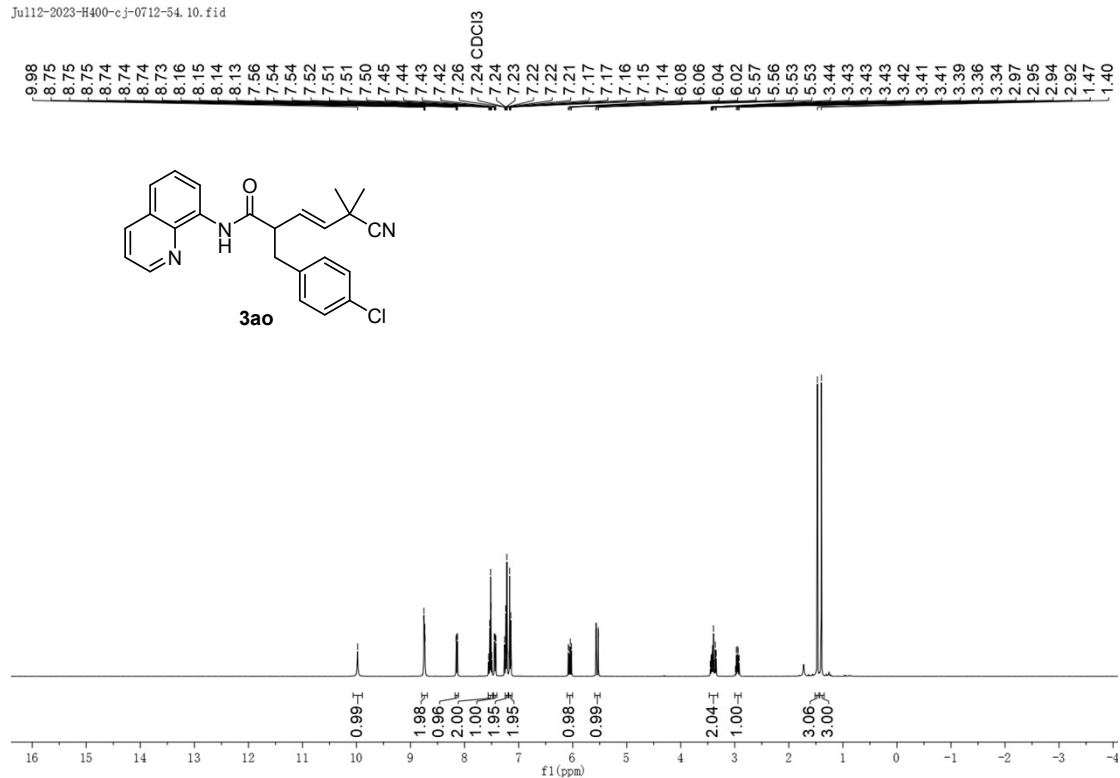

# <sup>13</sup>C NMR of 3ao (CDCl<sub>3</sub>, 101 MHz)

Jul12-2023-C400-cj-0712-54.11.fid

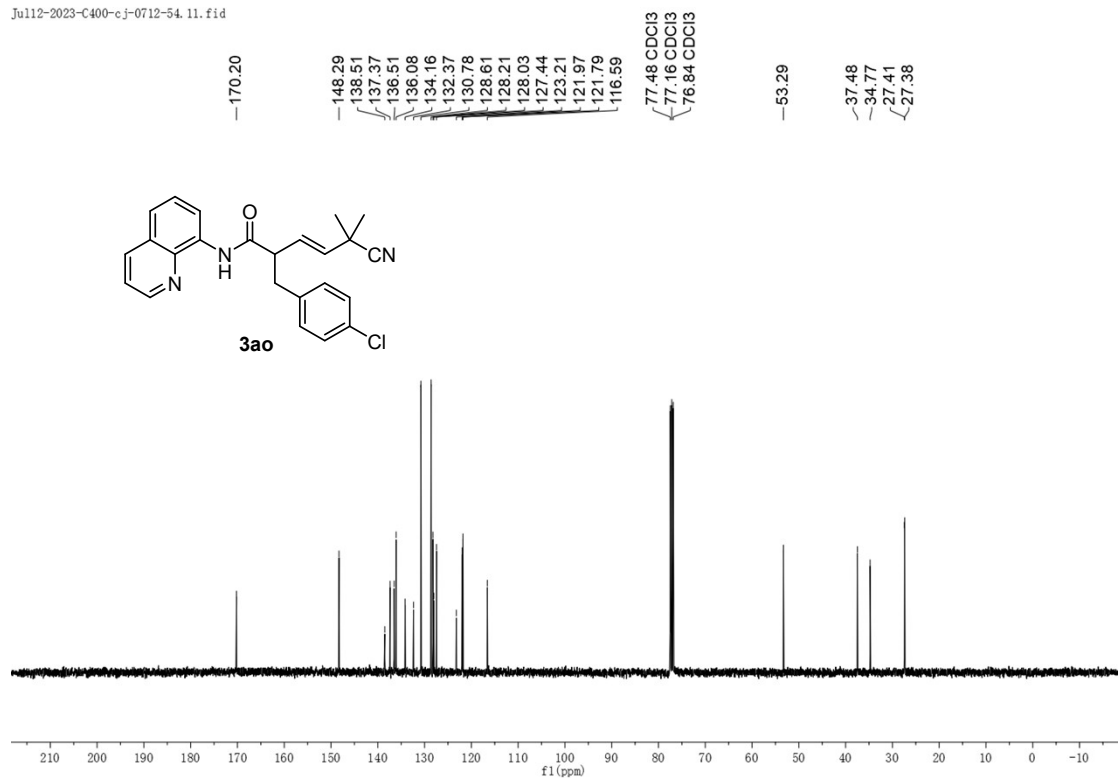

# <sup>1</sup>H NMR of 3ap (CDCl<sub>3</sub>, 400 MHz)

Jul14-2023-h400-cj-0714-55.10.fid

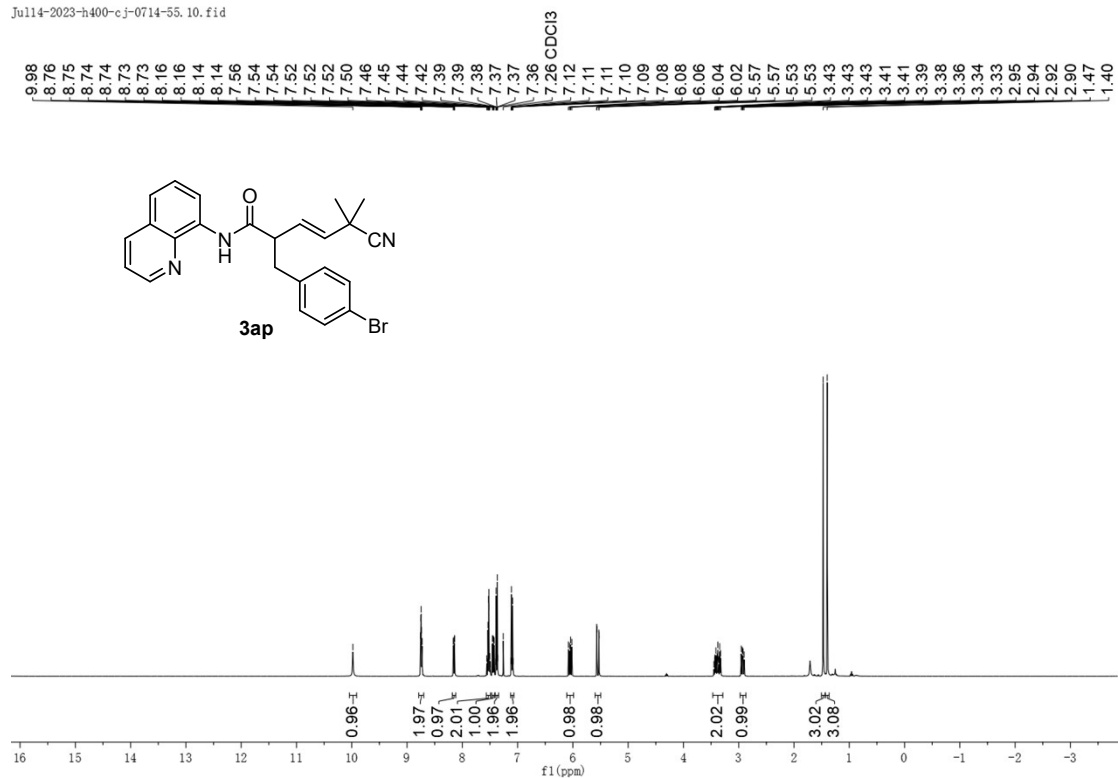

# <sup>13</sup>C NMR of 3ap (CDCl<sub>3</sub>, 101 MHz)

Jul14-2023-c400-cj-0714-55.11.fid

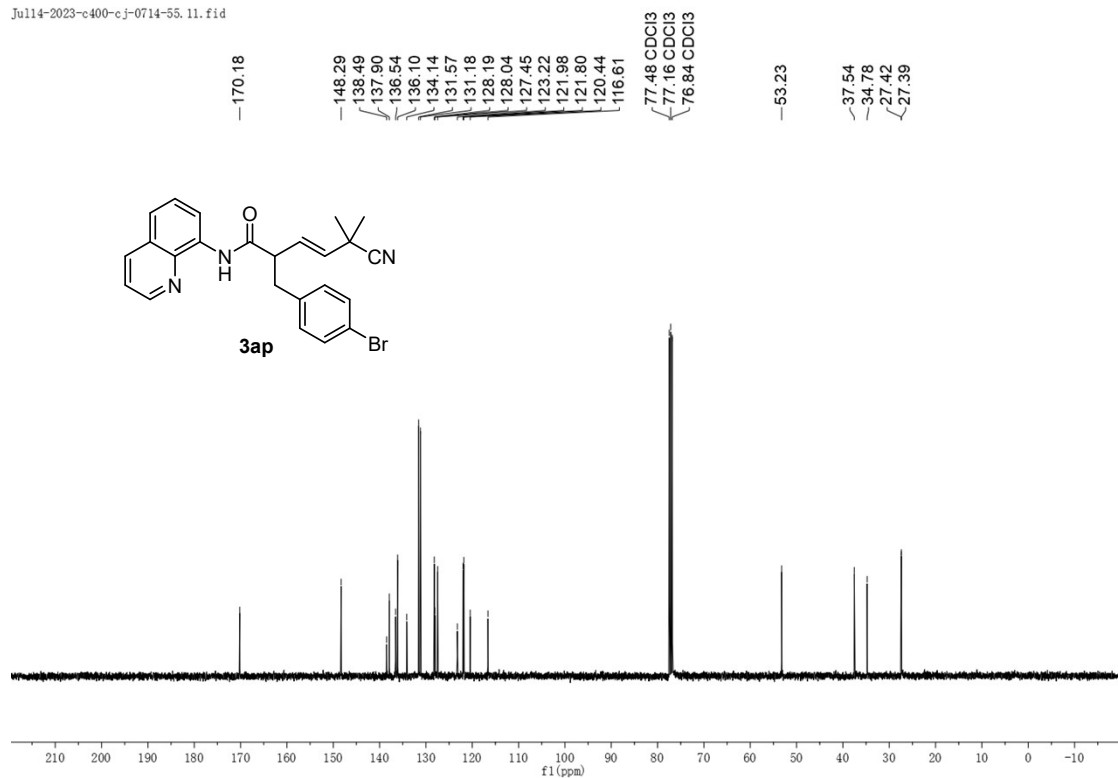

# <sup>1</sup>H NMR of 3aq (CDCl<sub>3</sub>, 400 MHz)

Jul04-2023-h400-cj-0704-40.10.fid

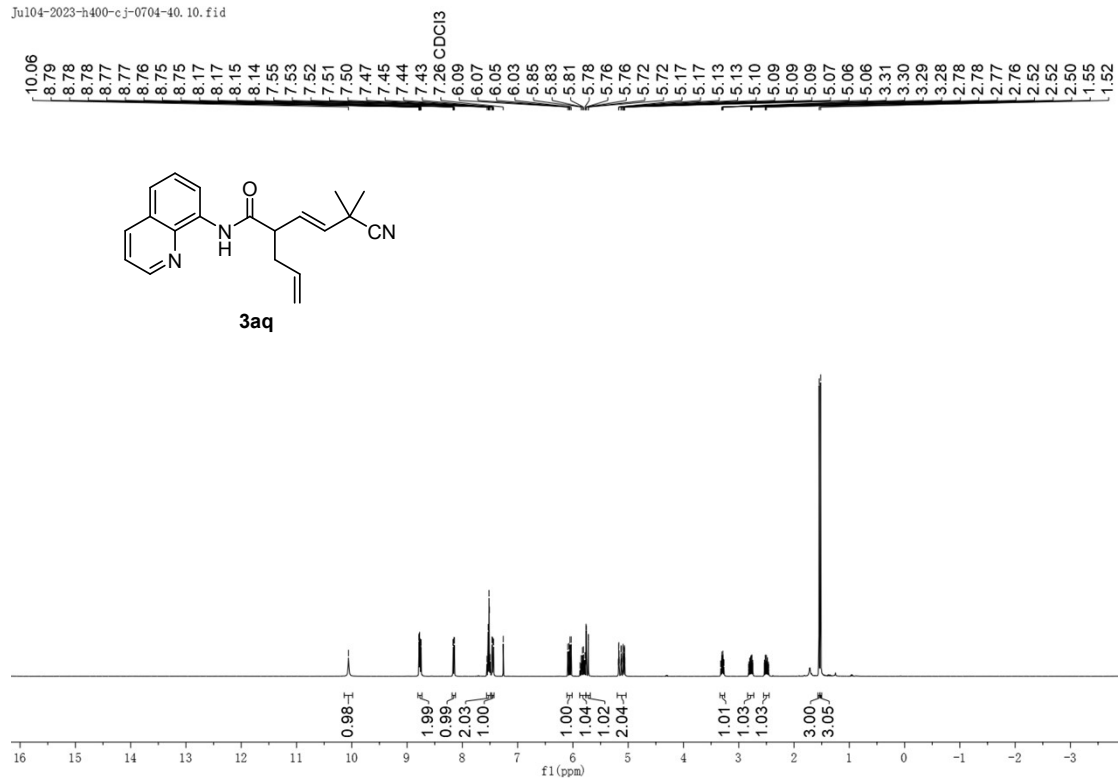

# <sup>13</sup>C NMR of 3aq (CDCl<sub>3</sub>, 101 MHz)

Jul04-2023-c400-cj-0704-40.11.fid

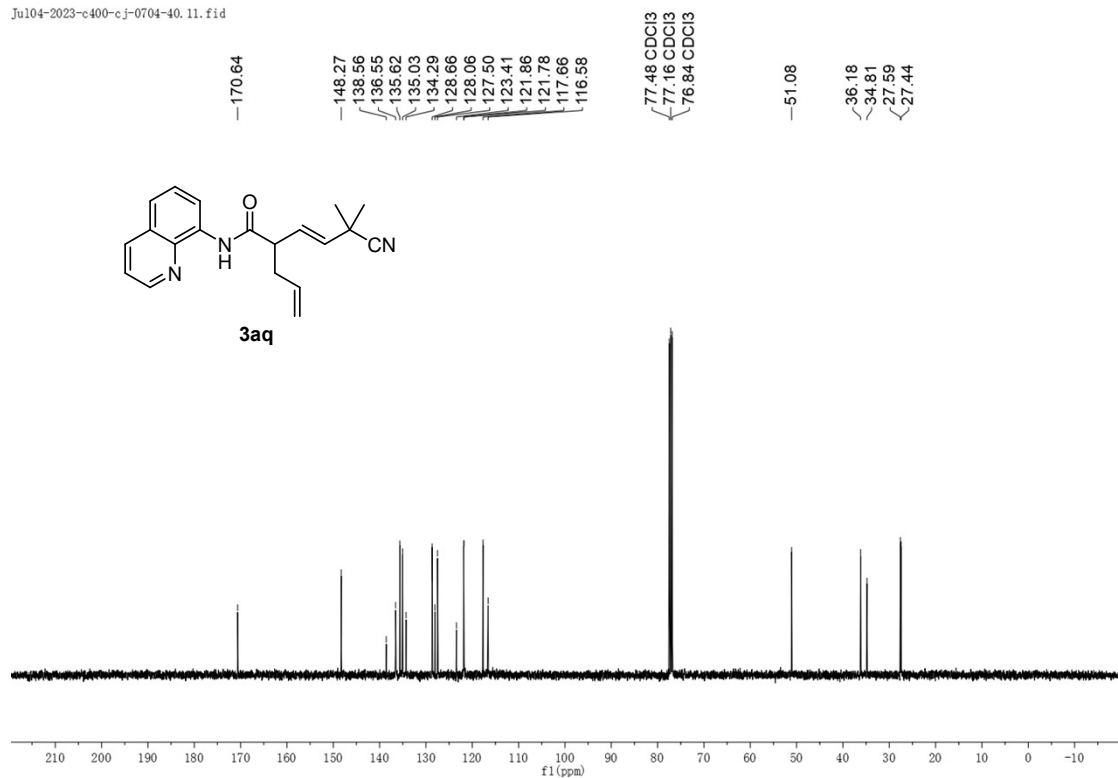

# <sup>1</sup>H NMR of 3ar (CDCl<sub>3</sub>, 400 MHz)

Jul13-2023-H400-cj-0713-41.10.fid

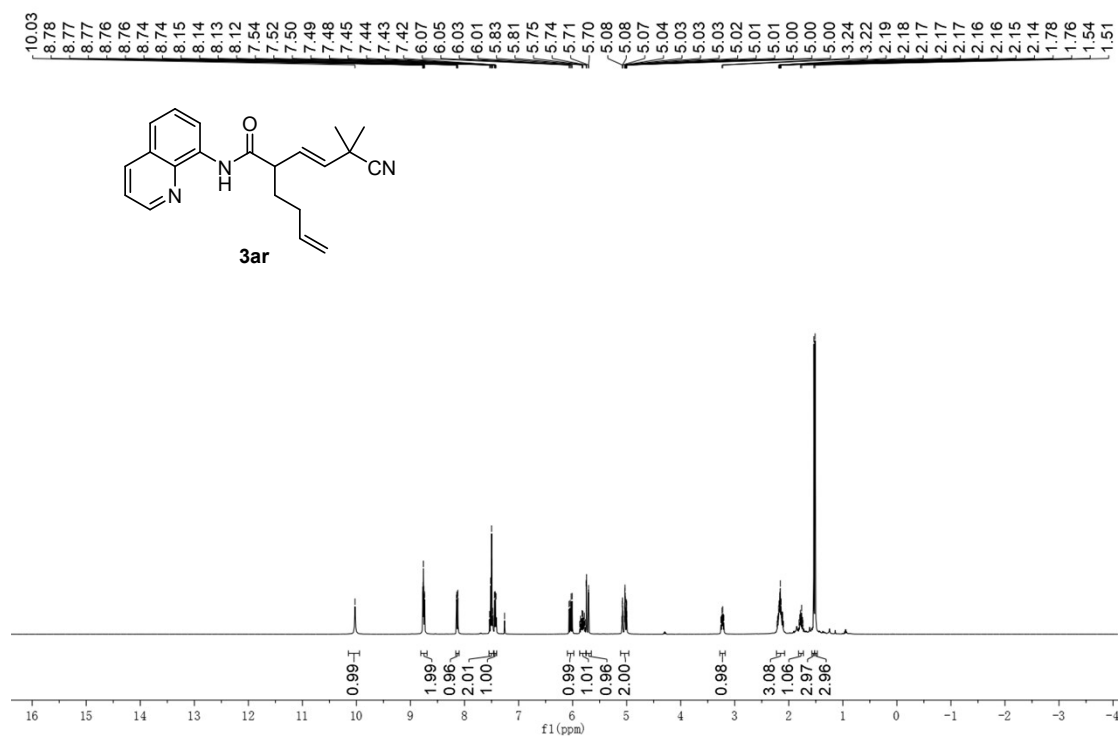

# <sup>13</sup>C NMR of 3ar (CDCl<sub>3</sub>, 101 MHz)

Jul13-2023-C400-cj-0713-41.11.fid

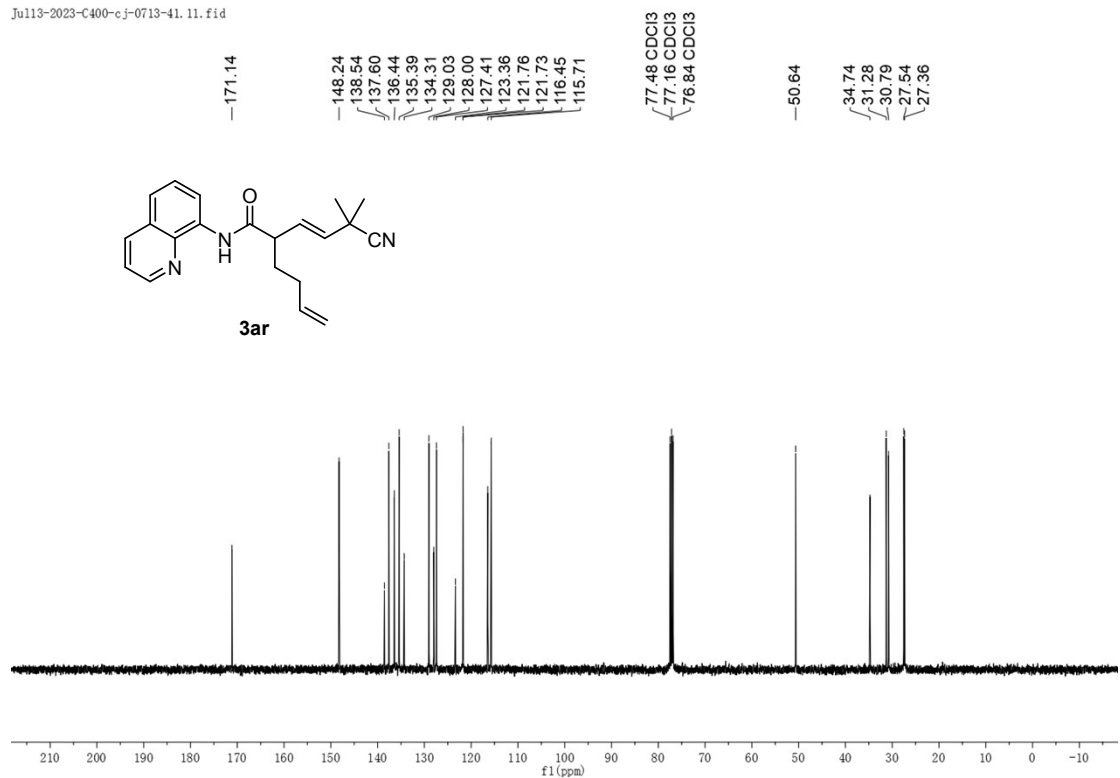

# <sup>1</sup>H NMR of 3as (CDCl<sub>3</sub>, 400 MHz)

Jul131-2023-h400-cj-0731-42.10.fid

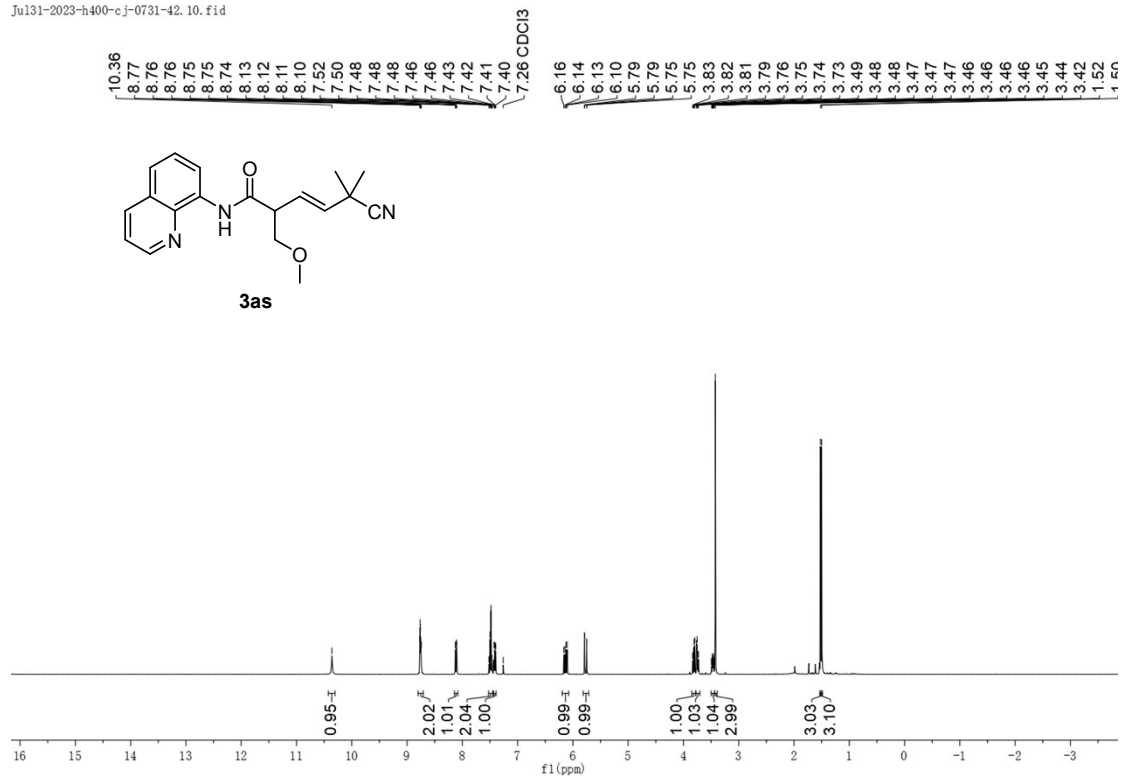

# <sup>13</sup>C NMR of 3as (CDCl<sub>3</sub>, 101 MHz)

Jul131-2023-c400-cj-0731-42.11.fid

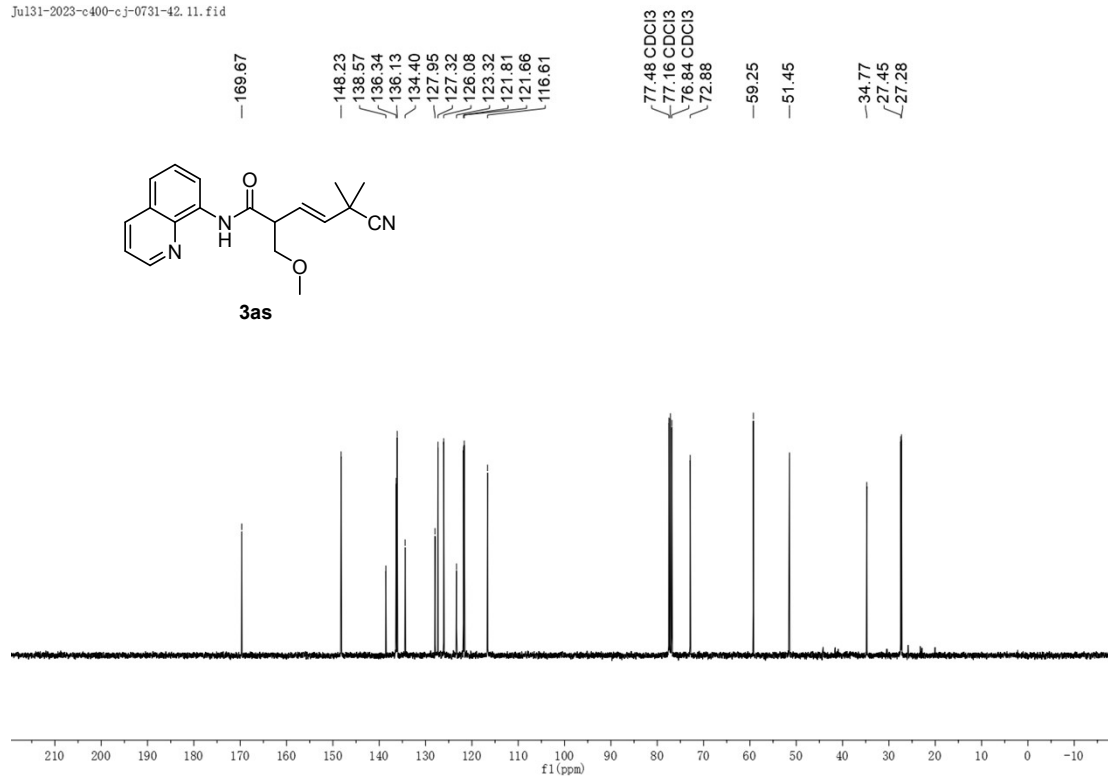

# <sup>1</sup>H NMR of 3at (CDCl<sub>3</sub>, 400 MHz)

Aug03-2023-H400-cj-0803-43.10.fid

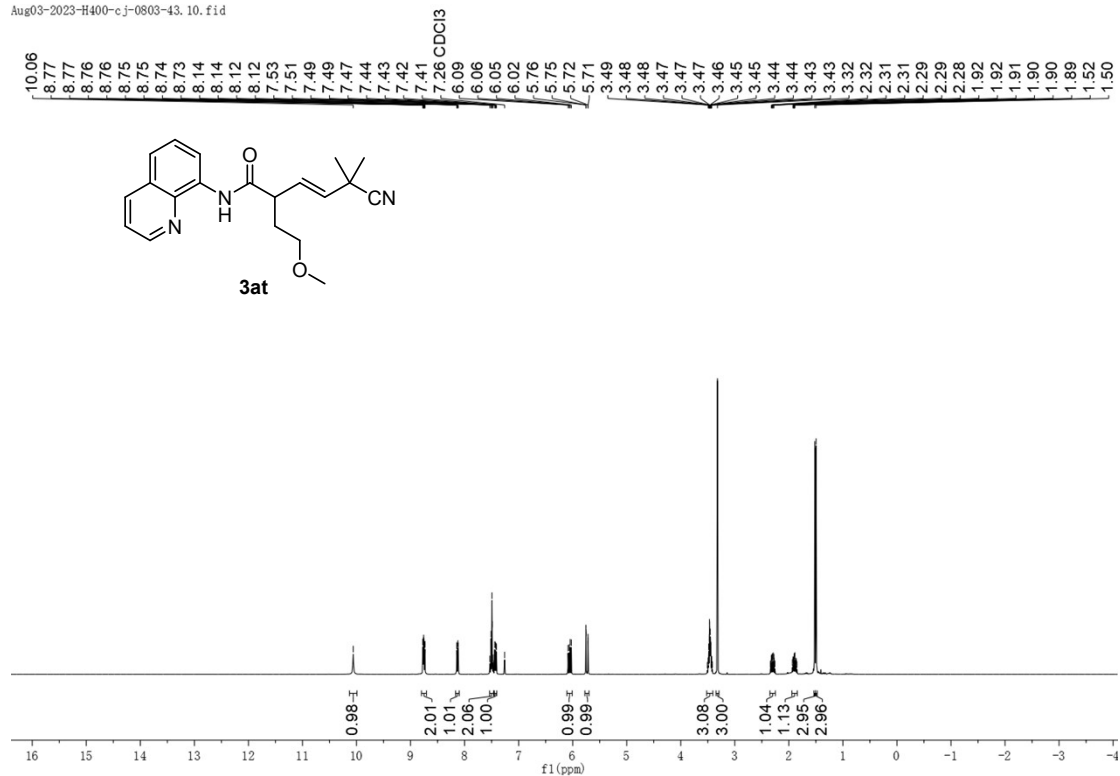

# <sup>13</sup>C NMR of 3at (CDCl<sub>3</sub>, 101 MHz)

Aug03-2023-C400-cj-0803-43.11.fid

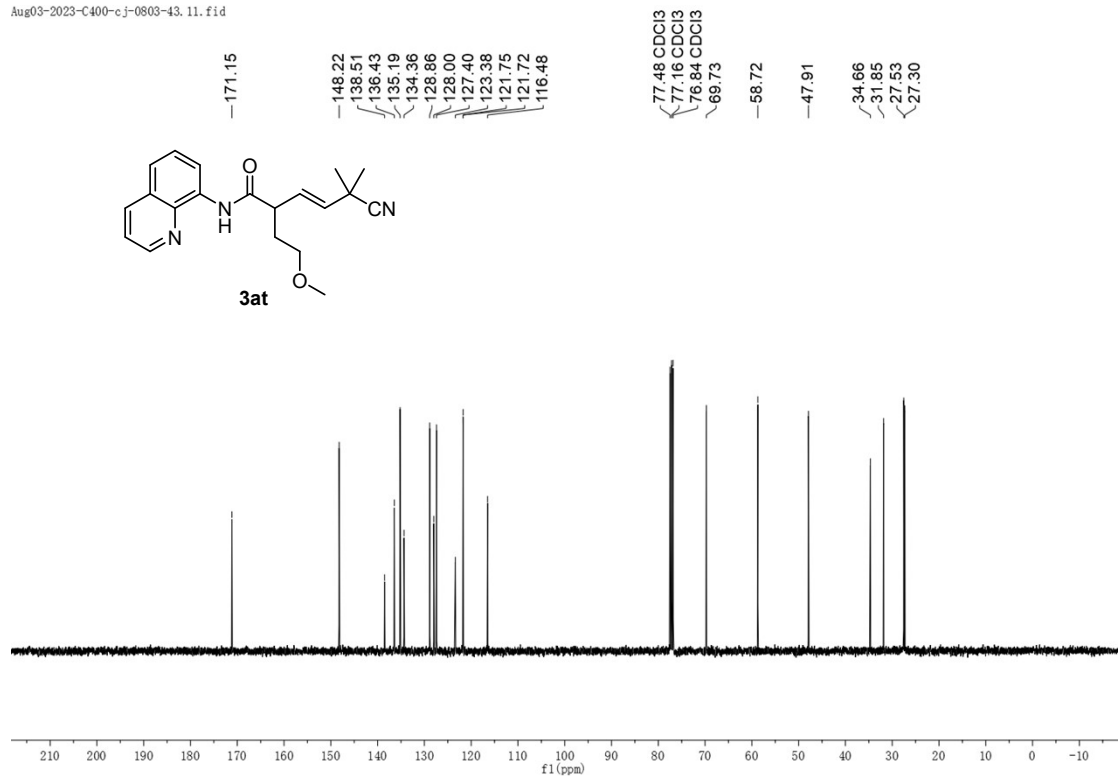



# <sup>1</sup>H NMR of 3au (CDCl<sub>3</sub>, 400 MHz)

Jul21-2023-h400-cj-0721-39.10.fid

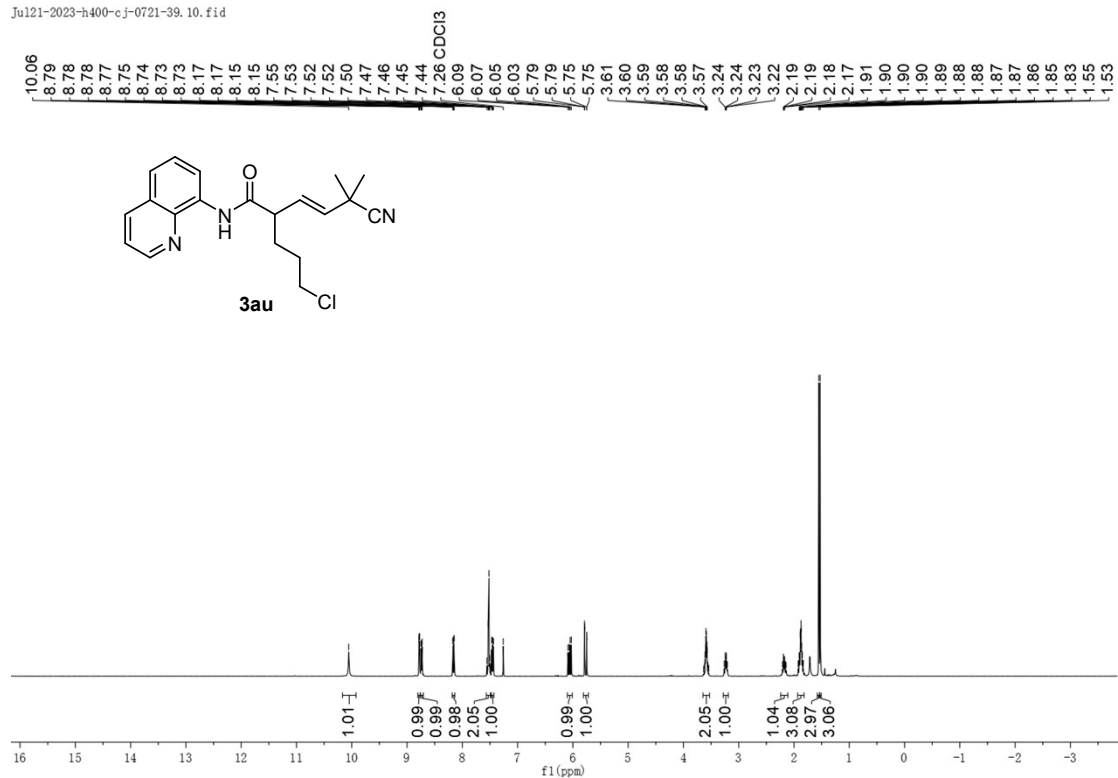

# <sup>13</sup>C NMR of 3au (CDCl<sub>3</sub>, 101 MHz)

Jul21-2023-c400-cj-0721-39.11.fid

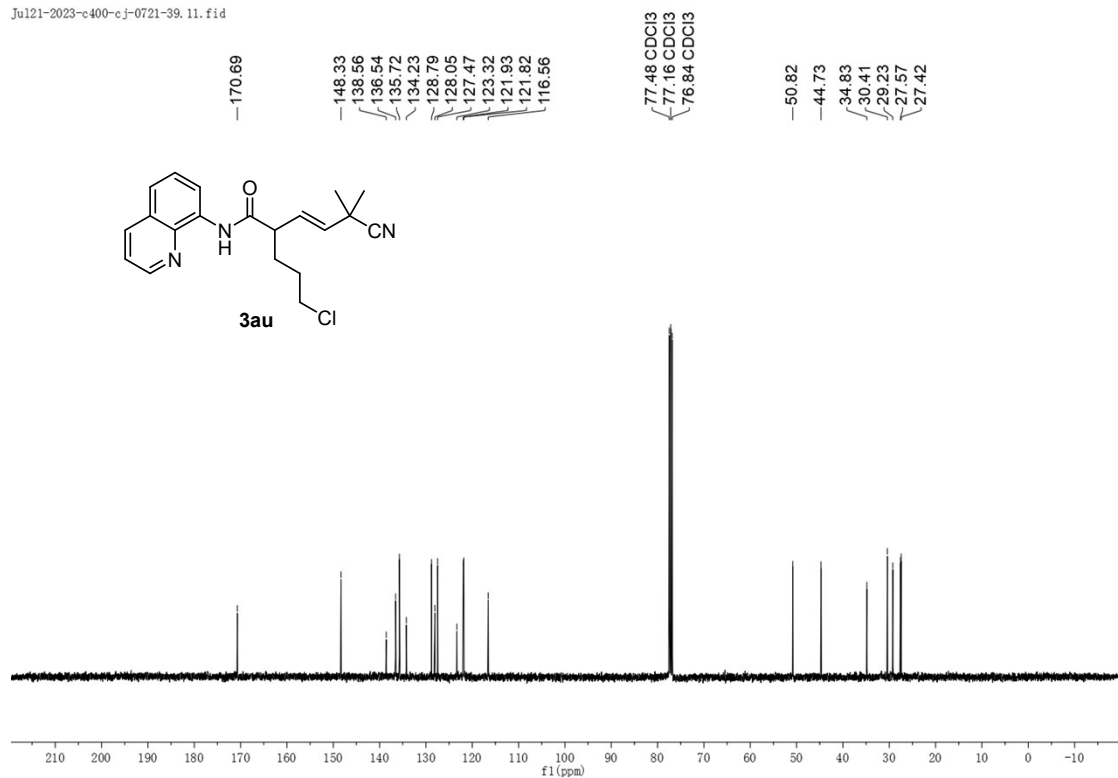

# <sup>1</sup>H NMR of 3av (CDCl<sub>3</sub>, 400 MHz)

Jul18-2023-h400-cj-0718-58.10.fid

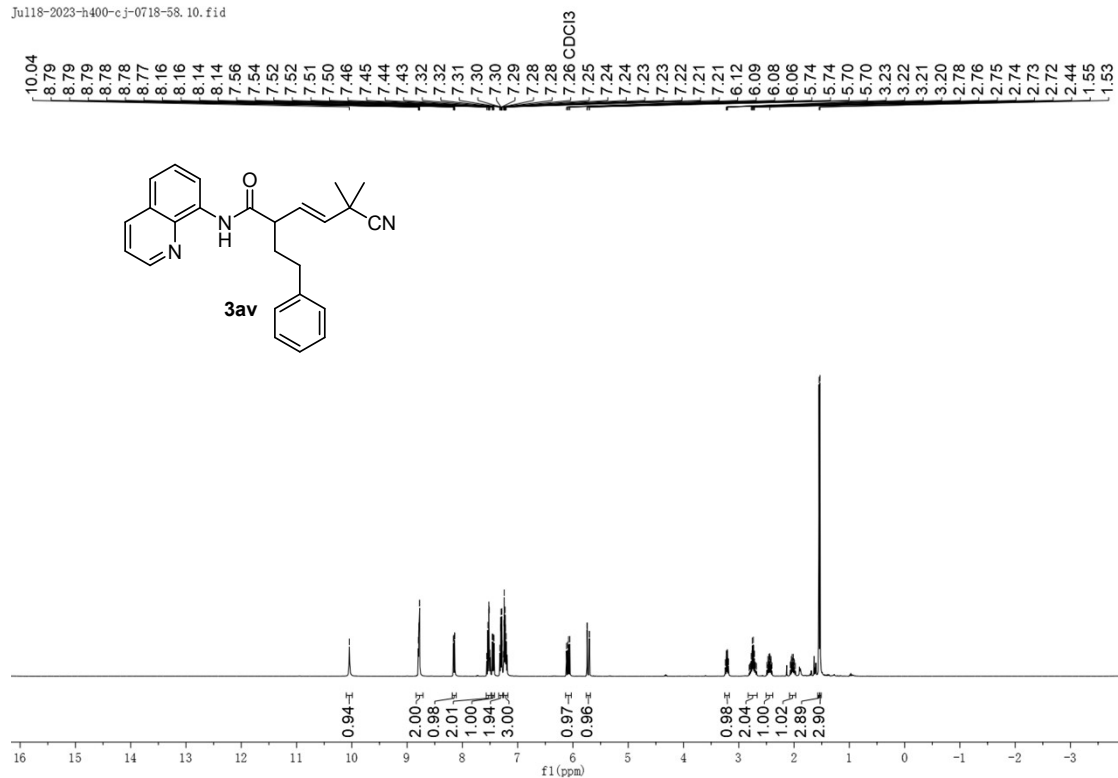

# <sup>13</sup>C NMR of 3av (CDCl<sub>3</sub>, 101 MHz)

Jul18-2023-c400-cj-0718-58.11.fid

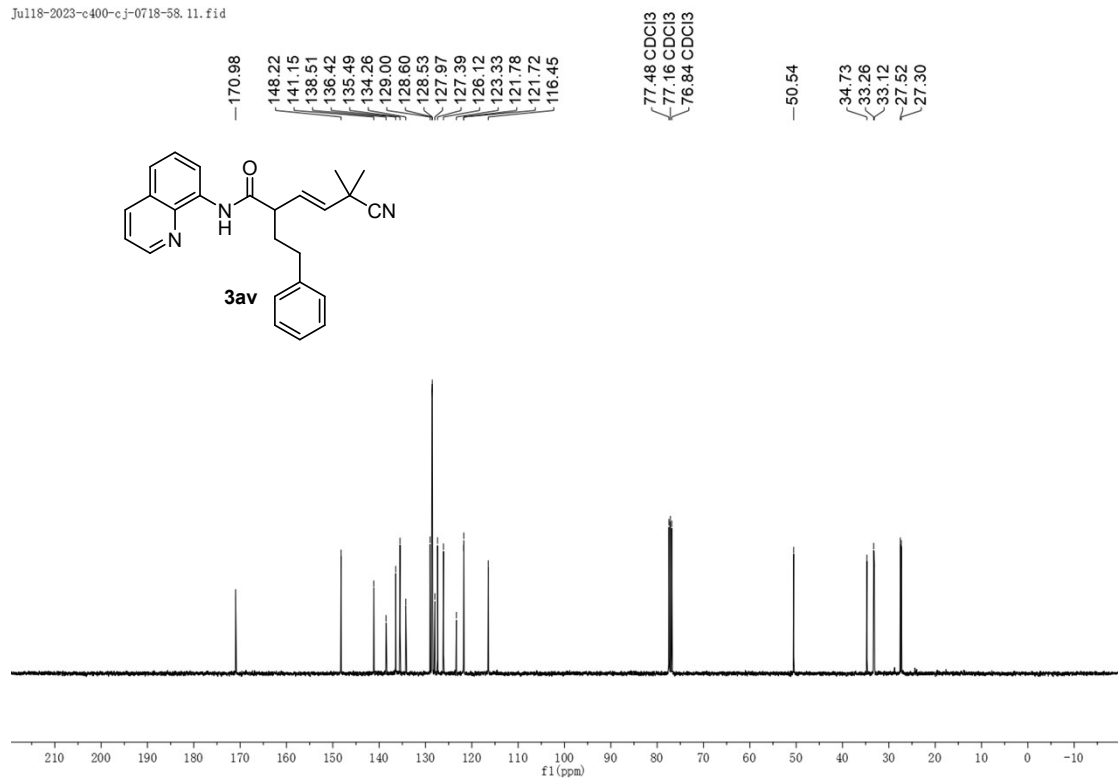

# <sup>1</sup>H NMR of 3aw (CDCl<sub>3</sub>, 400 MHz)

Aug03-2023-H400-cj-0803-72.10.fid

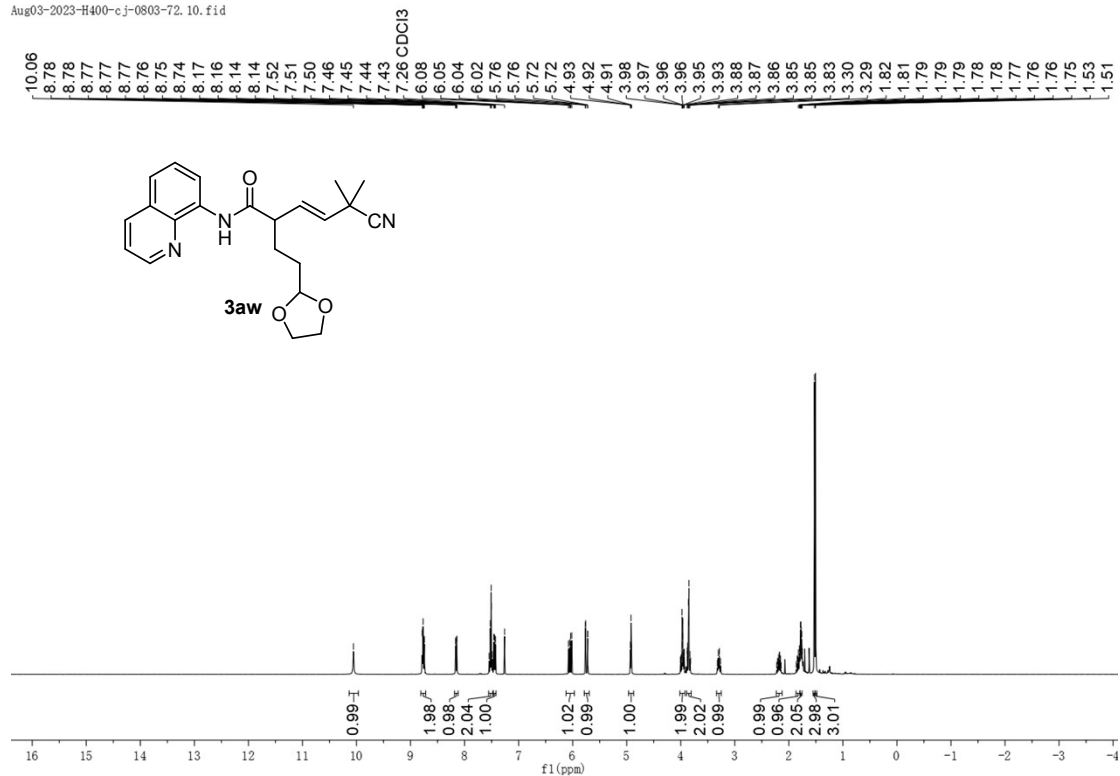

# <sup>13</sup>C NMR of 3aw (CDCl<sub>3</sub>, 101 MHz)

Aug03-2023-C400-cj-0803-72.11.fid

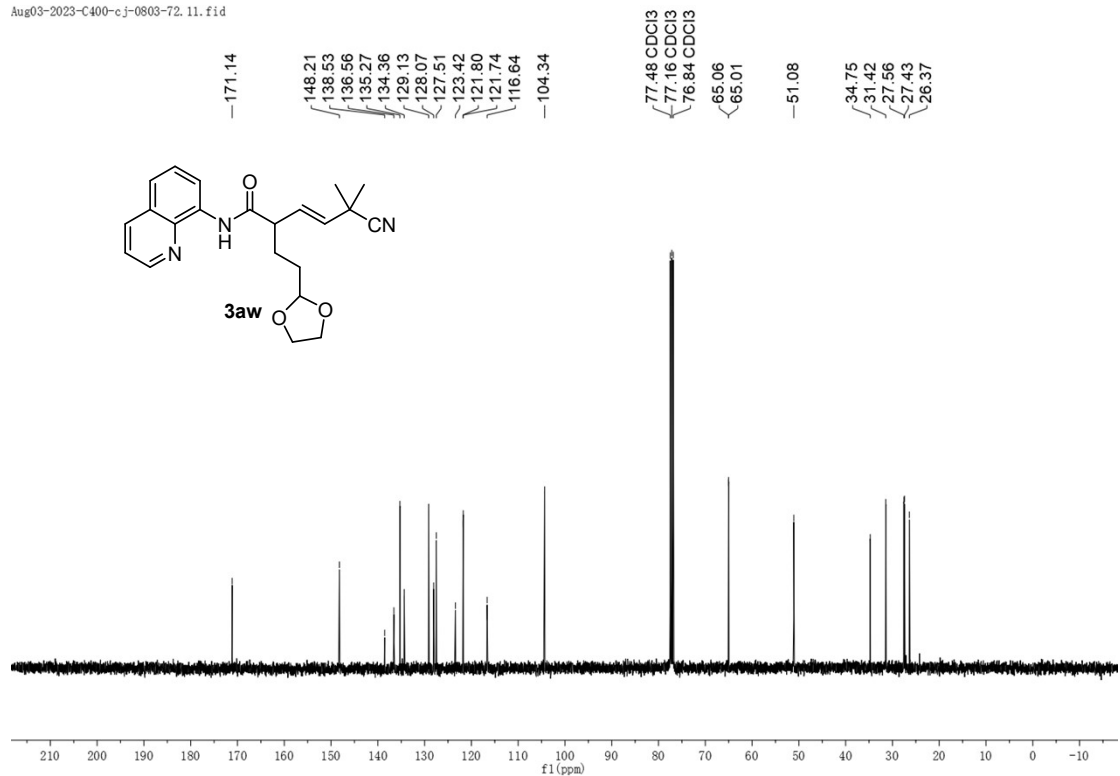

# <sup>1</sup>H NMR of 3ax (CDCl<sub>3</sub>, 400 MHz)

Oct10-2023-h400-c-j-1010-da.10.fid

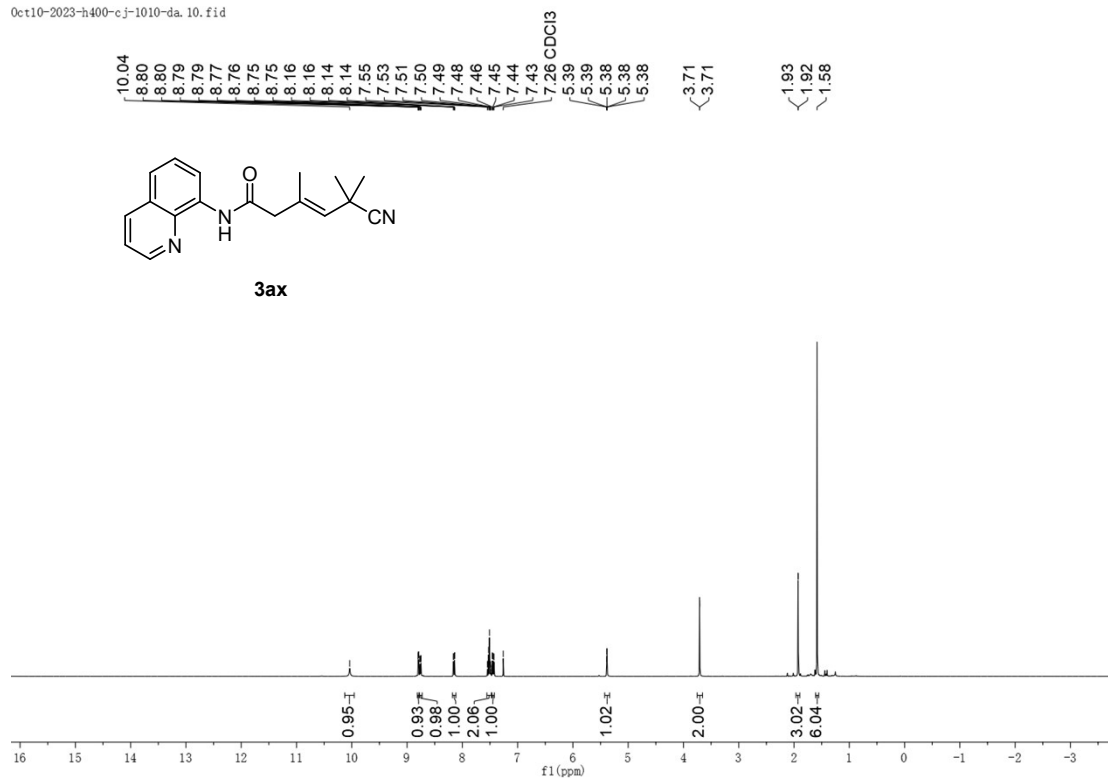

# <sup>13</sup>C NMR of 3ax (CDCl<sub>3</sub>, 101 MHz)

Oct10-2023-c400-c-j-1010-da.11.fid

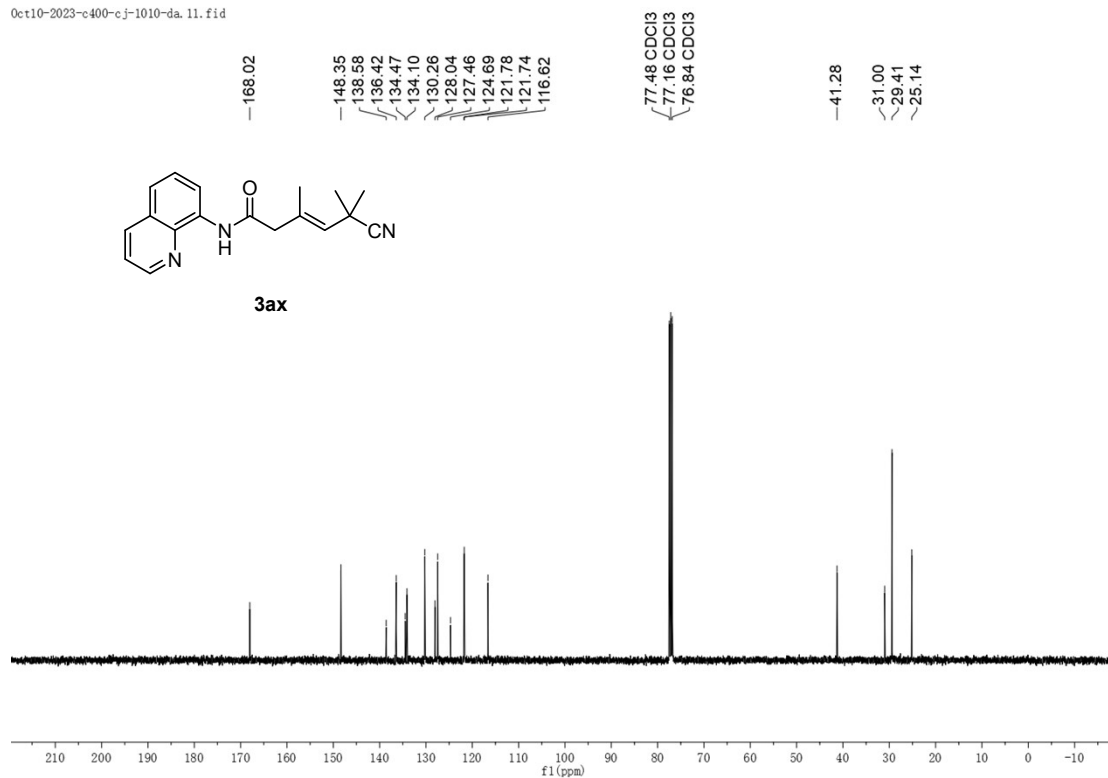

# <sup>1</sup>H NMR of 3ay' (CDCl<sub>3</sub>, 400 MHz)

Sep27-2023-h400-cj-0927-yi.10.fid

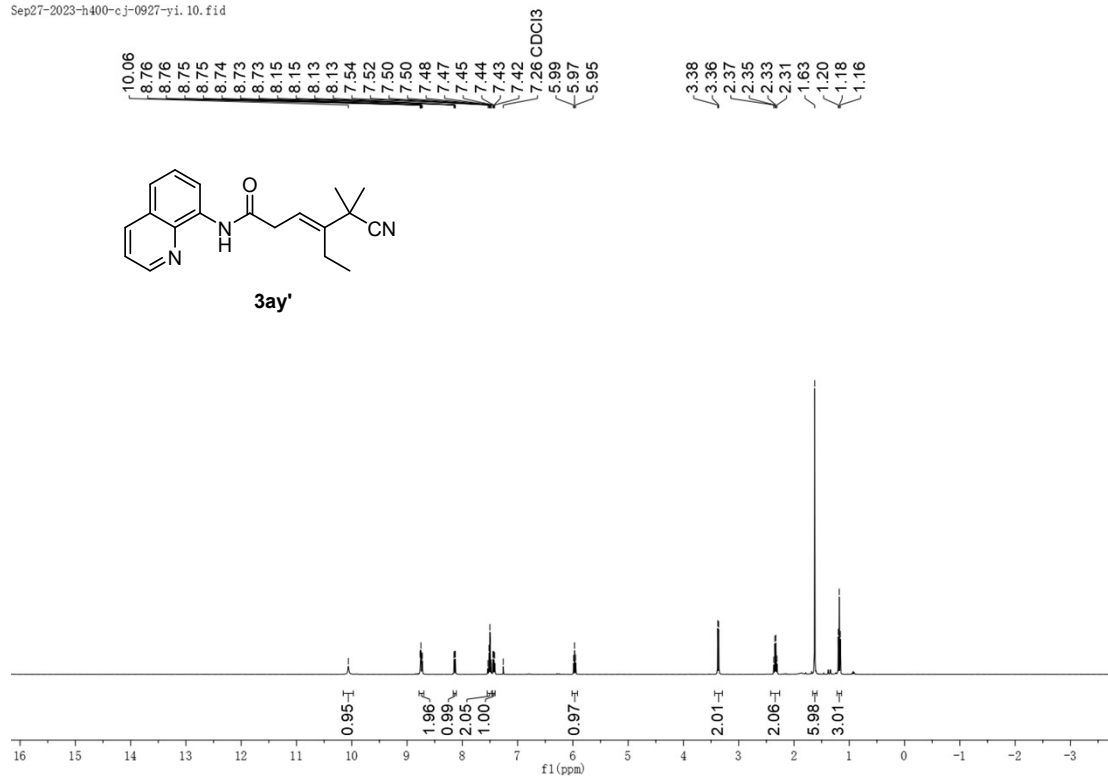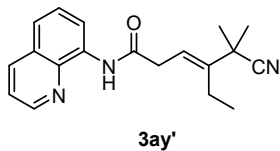

# <sup>13</sup>C NMR of 3ay' (CDCl<sub>3</sub>, 101 MHz)

Sep27-2023-c400-cj-0927-yi.11.fid

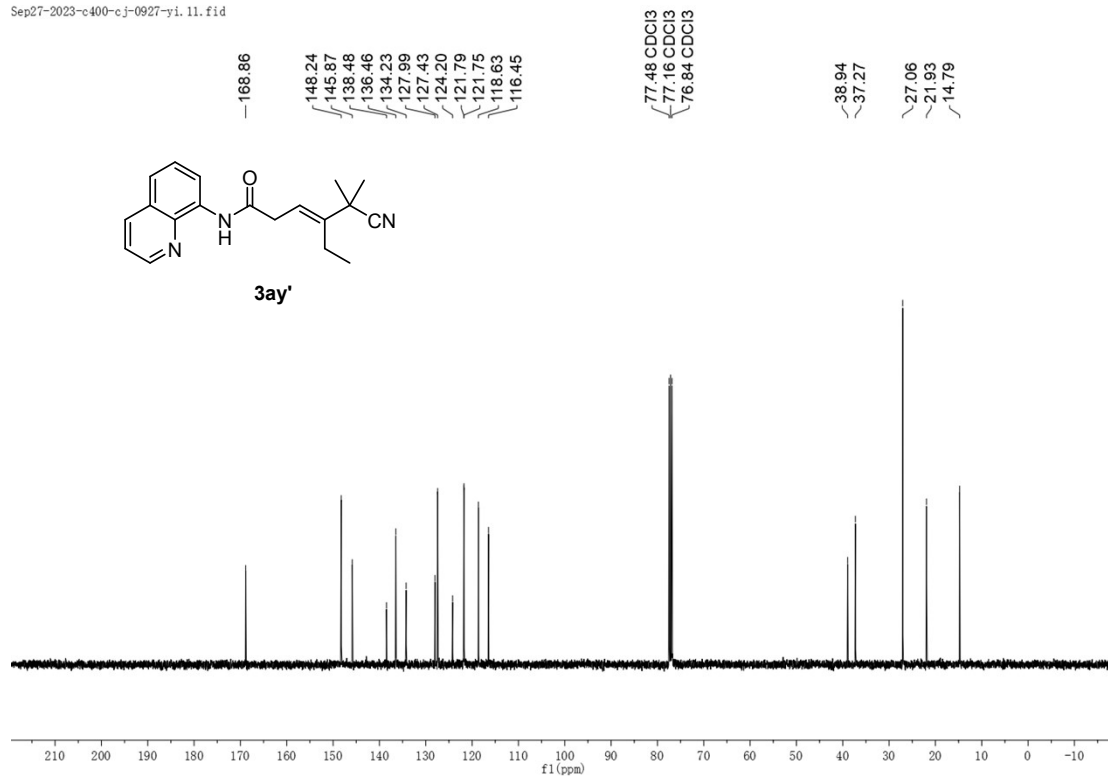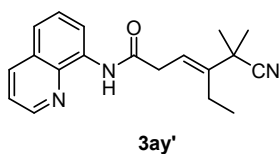

# <sup>1</sup>H NMR of 3az (CDCl<sub>3</sub>, 400 MHz)

Jul26-2023-H400-cj-0726-65.10.fid

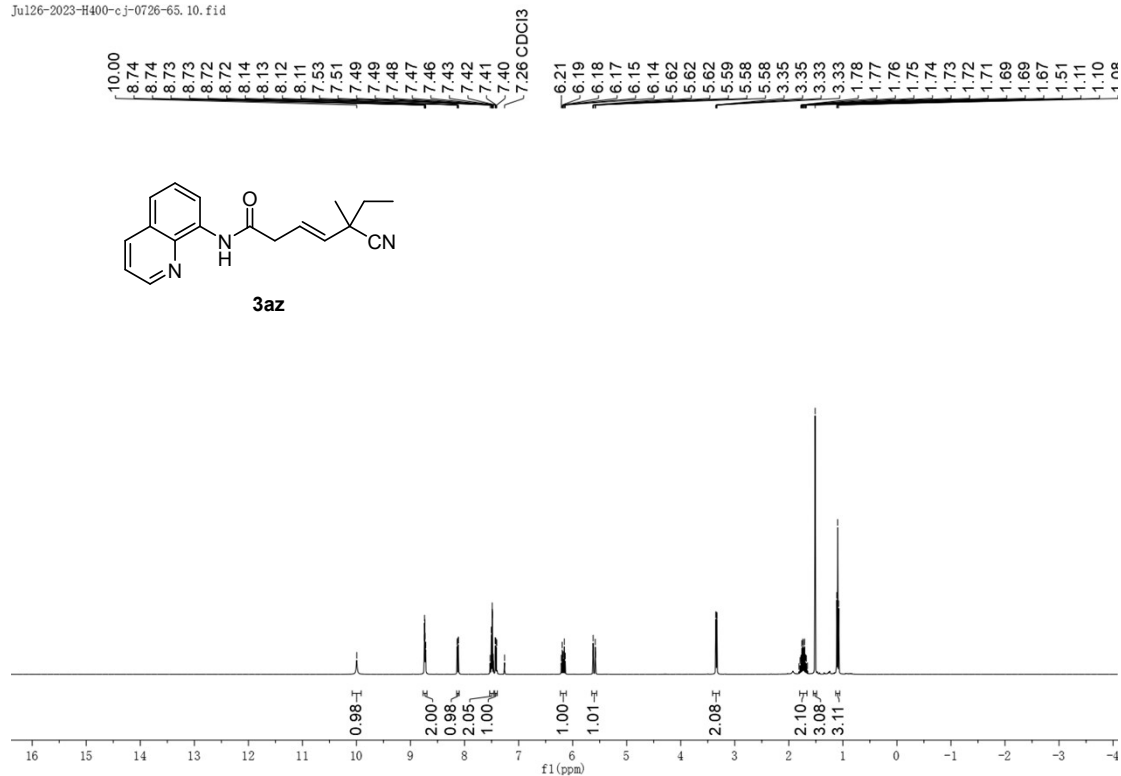

# <sup>13</sup>C NMR of 3az (CDCl<sub>3</sub>, 101 MHz)

Jul26-2023-C400-cj-0726-65.11.fid

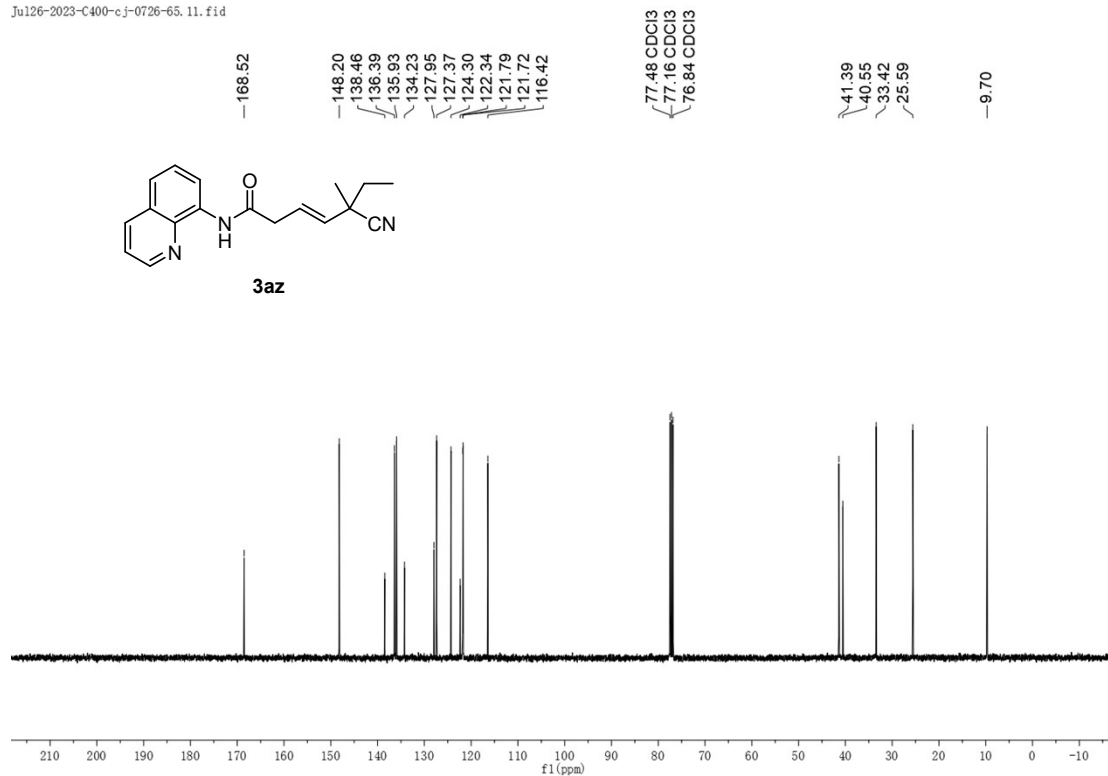

# <sup>1</sup>H NMR of 3az' (CDCl<sub>3</sub>, 400 MHz)

Jul27-2023-H400-cj-0727-66.10.fid

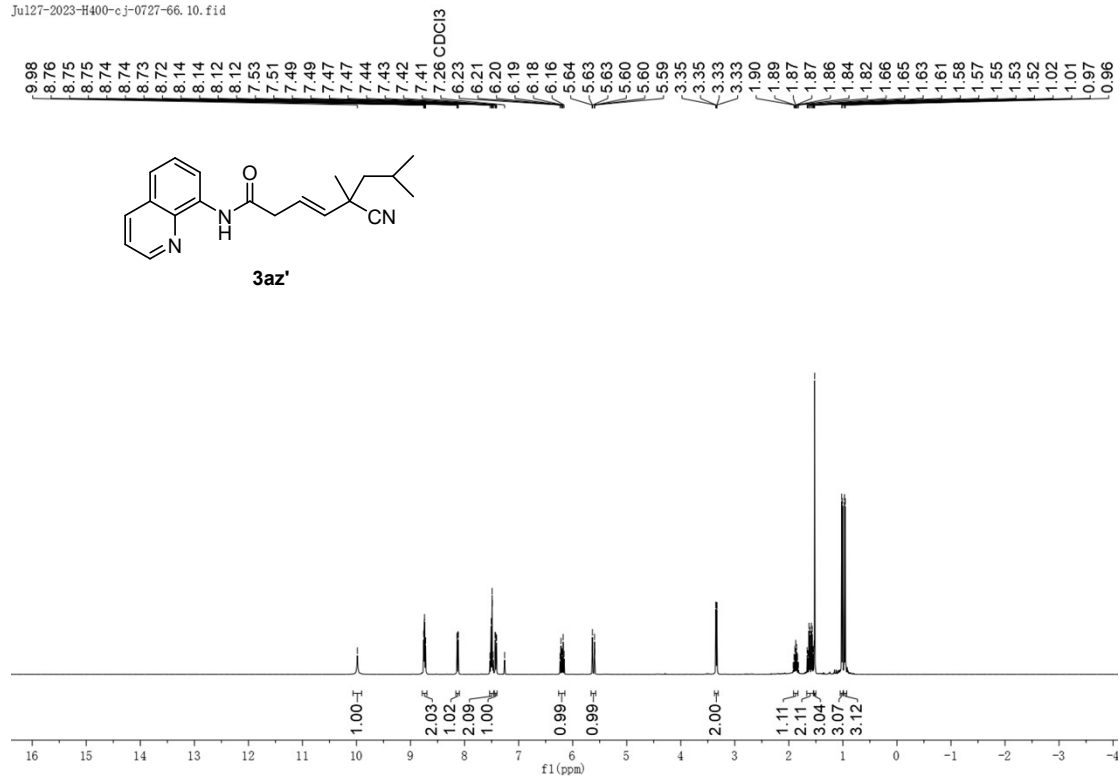

# <sup>13</sup>C NMR of 3az' (CDCl<sub>3</sub>, 101 MHz)

Jul27-2023-C400-cj-0727-66.11.fid

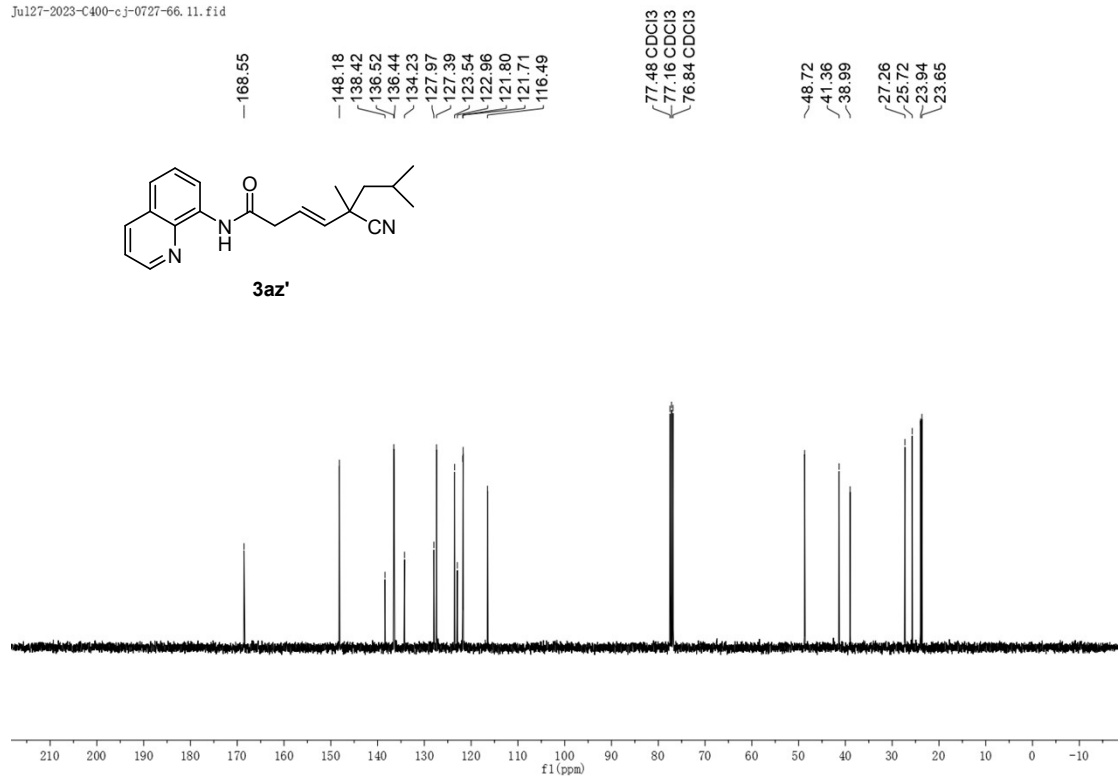

# <sup>1</sup>H NMR of 4aa (CDCl<sub>3</sub>, 400 MHz)

Apr19-2023-h400-wxy-0419-CN. 10. fid

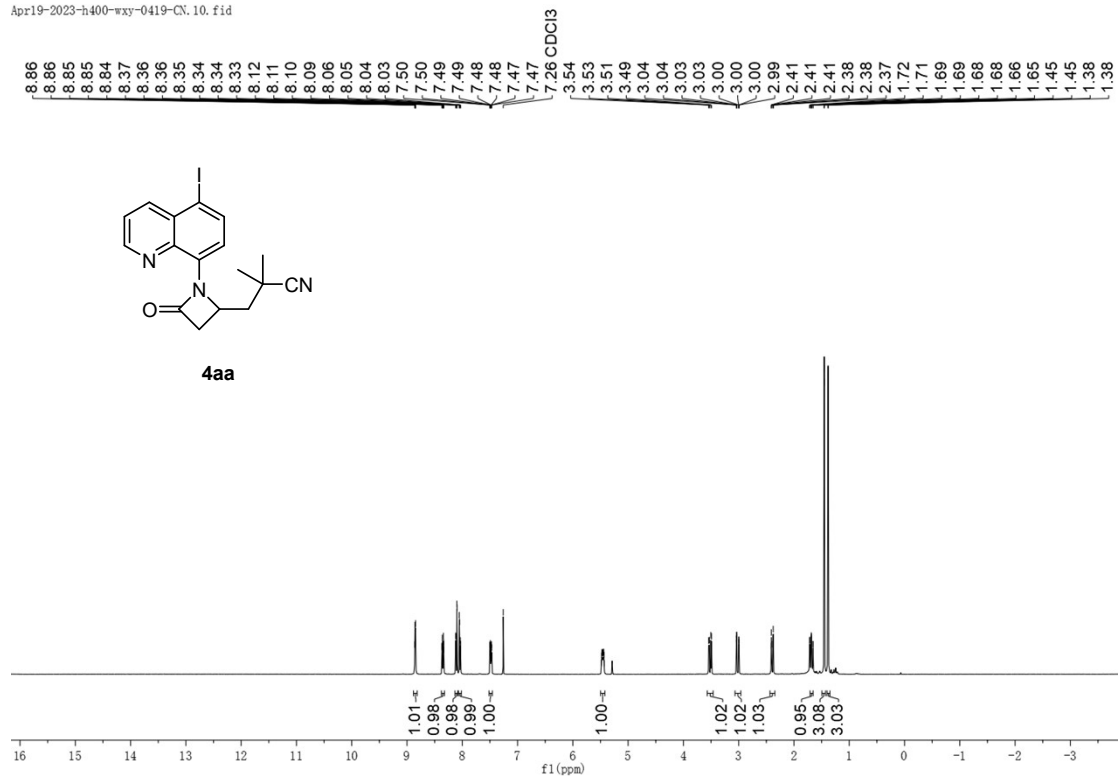

# <sup>13</sup>C NMR of 4aa (CDCl<sub>3</sub>, 101 MHz)

Apr20-2023-c400-wxy-0419-CN. 10. fid

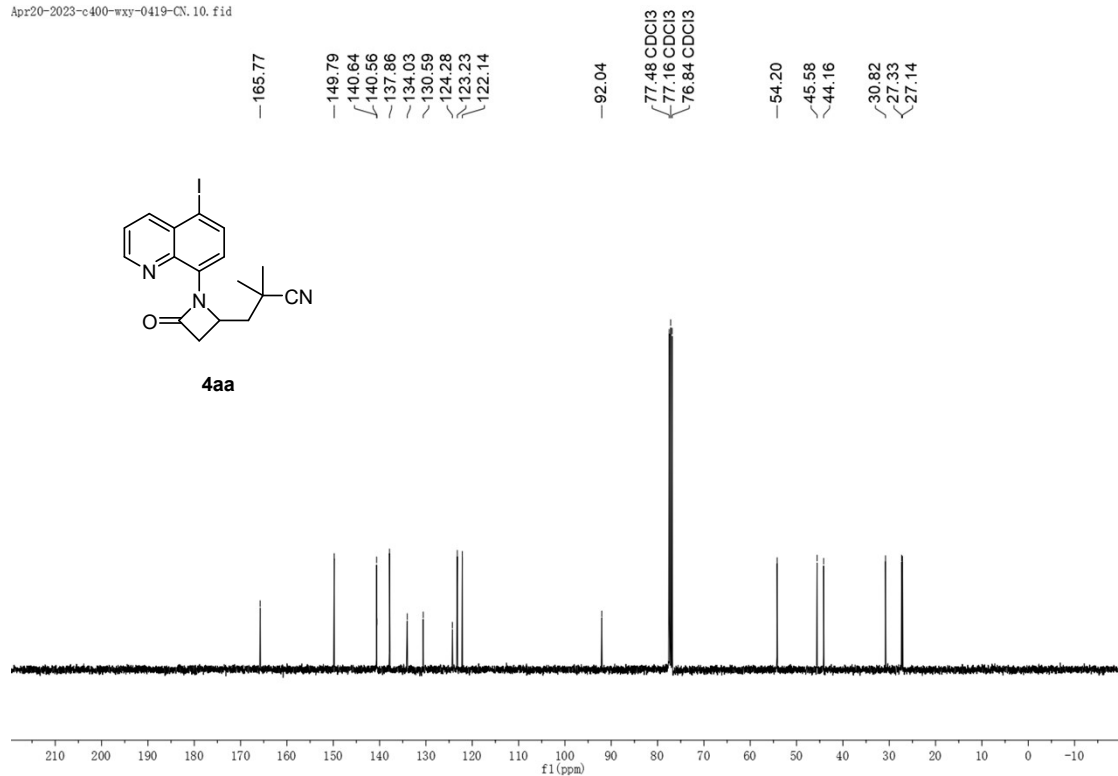



# <sup>1</sup>H NMR of 4ab (CDCl<sub>3</sub>, 400 MHz)

Feb28-2023-h400-wxy-0228-mez. 10. fid

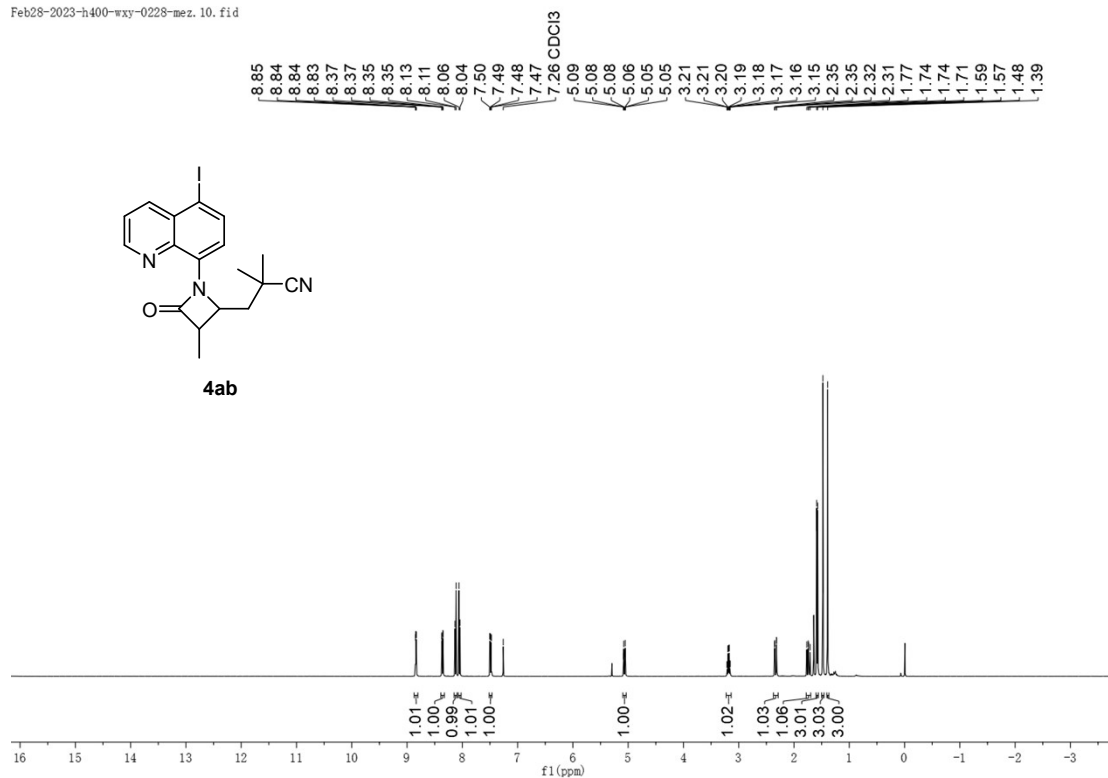

# <sup>13</sup>C NMR of 4ab (CDCl<sub>3</sub>, 101 MHz)

Feb28-2023-c400-wxy-0228-mez. 10. fid

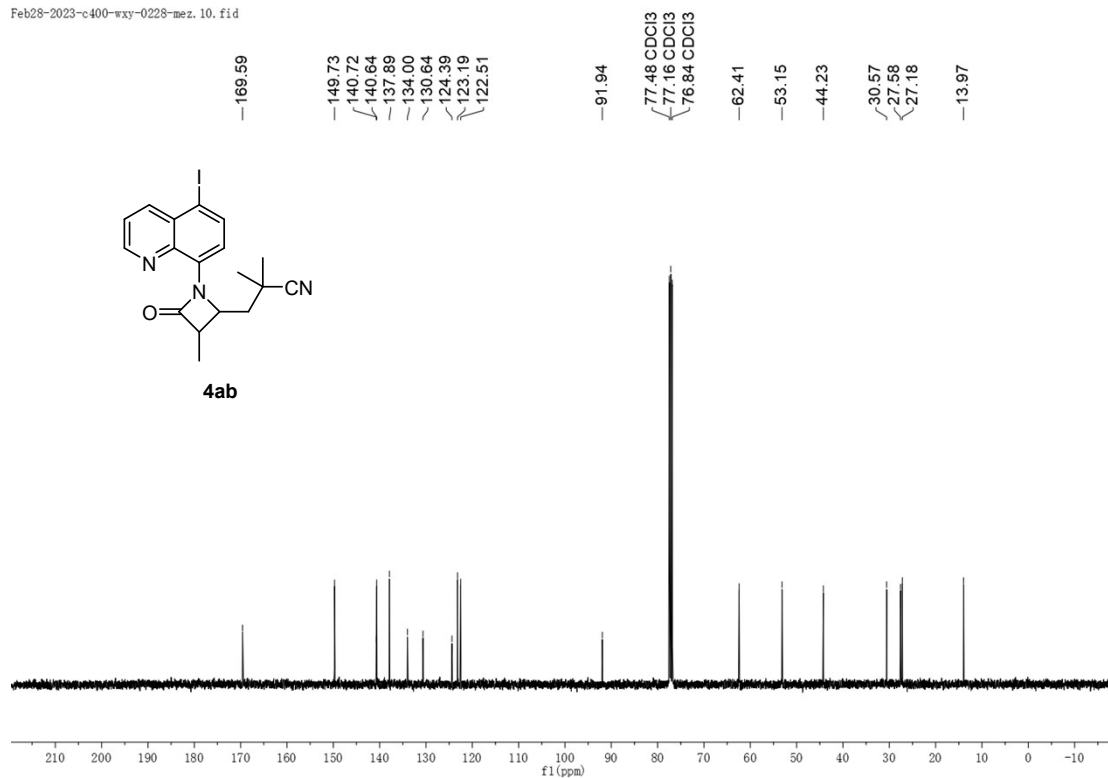

# $^1\text{H}$ NMR of 4ac ( $\text{CDCl}_3$ , 400 MHz)

Mar07-2023-h400-wxy-0307-et. 10. fid

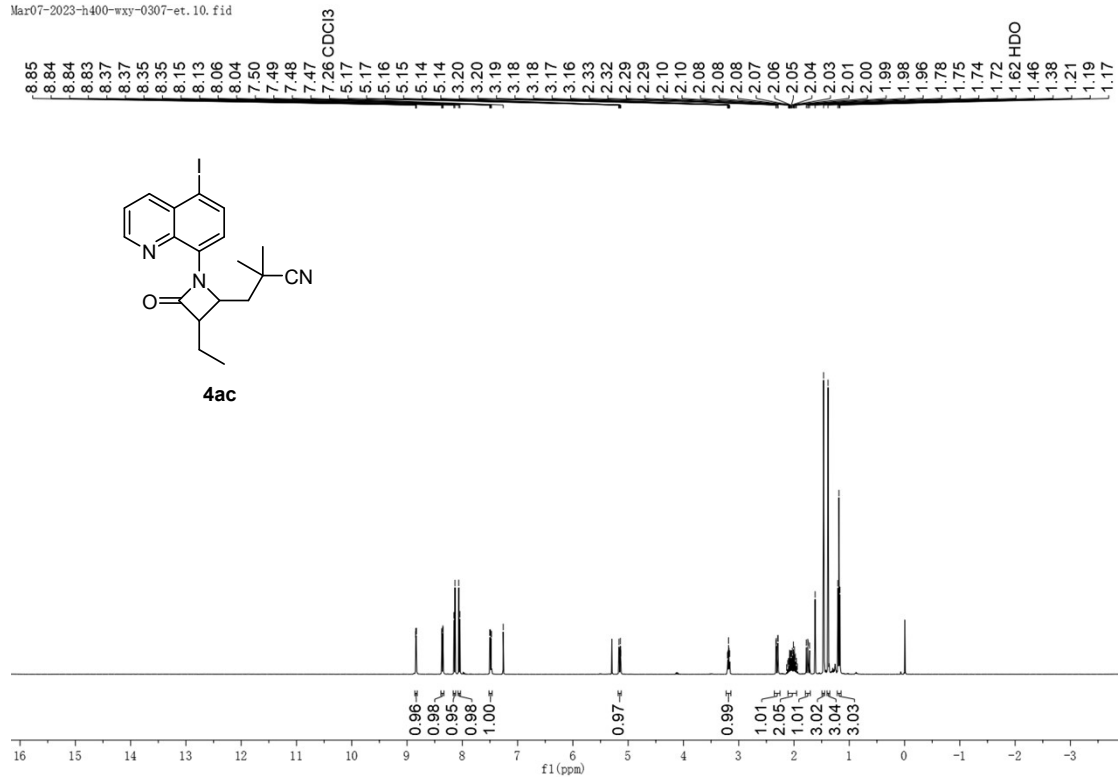

# $^{13}\text{C}$ NMR of 4ac ( $\text{CDCl}_3$ , 101 MHz)

Mar07-2023-c400-wxy-0307-et. 10. fid

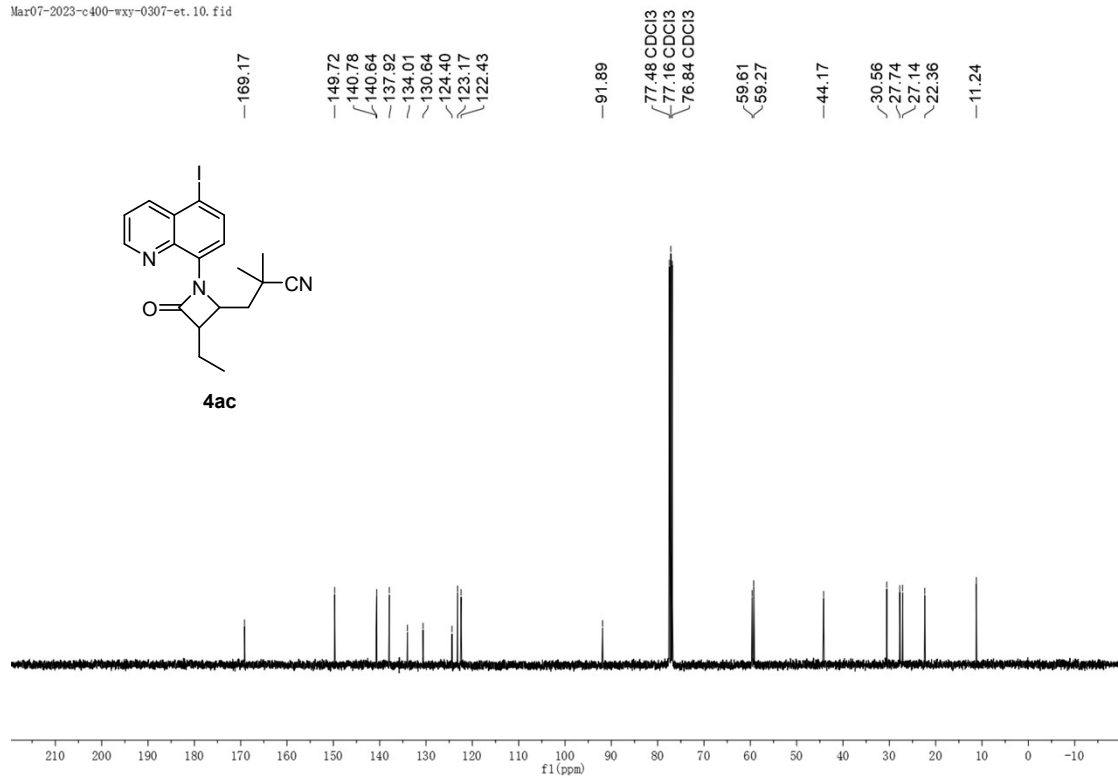

# <sup>1</sup>H NMR of 4ad (CDCl<sub>3</sub>, 400 MHz)

Feb28-2023-h400-wxy-0228-3hz. 10. fid

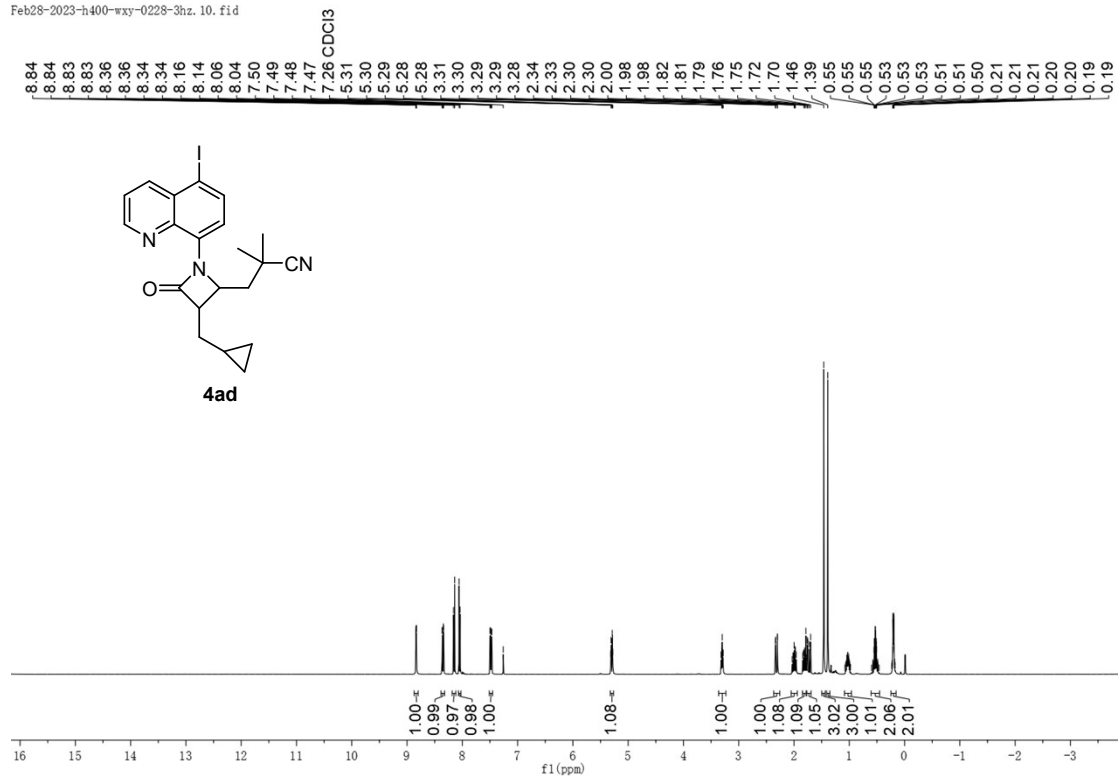

# <sup>13</sup>C NMR of 4ad (CDCl<sub>3</sub>, 101 MHz)

Feb28-2023-c400-wxy-0228-3hz. 10. fid

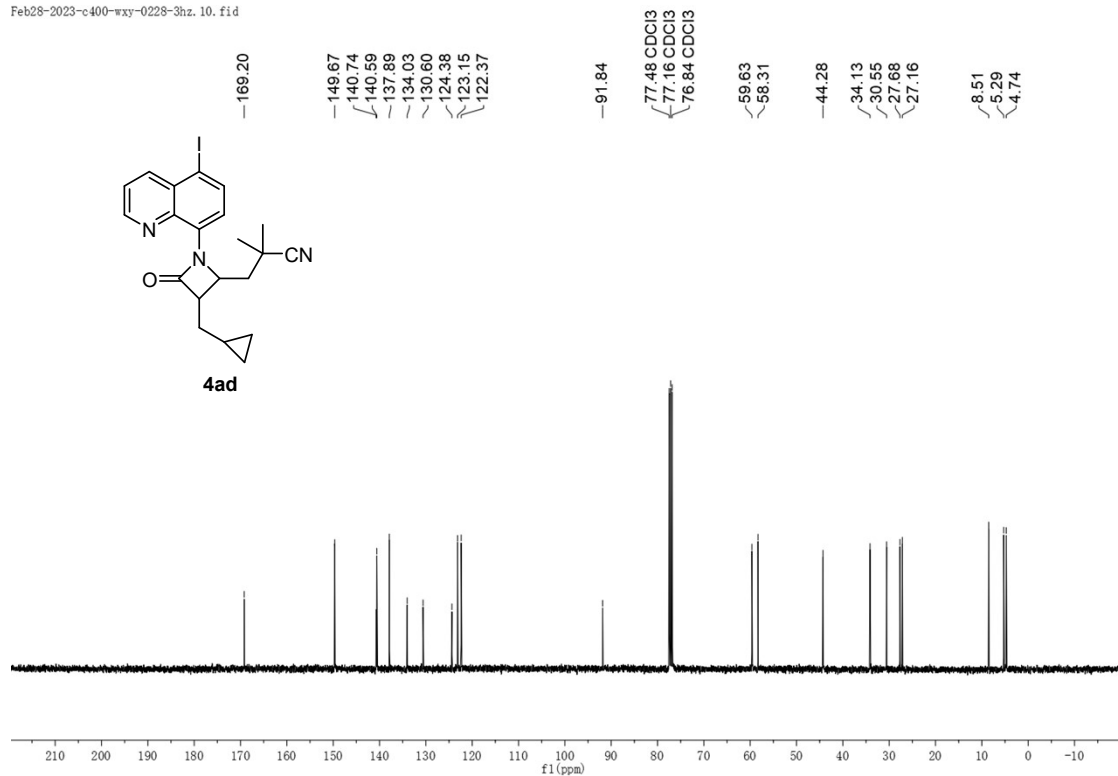

# <sup>1</sup>H NMR of 4ae (CDCl<sub>3</sub>, 400 MHz)

Apr07-2023-H400-wxy-0407-4h. 10. fid

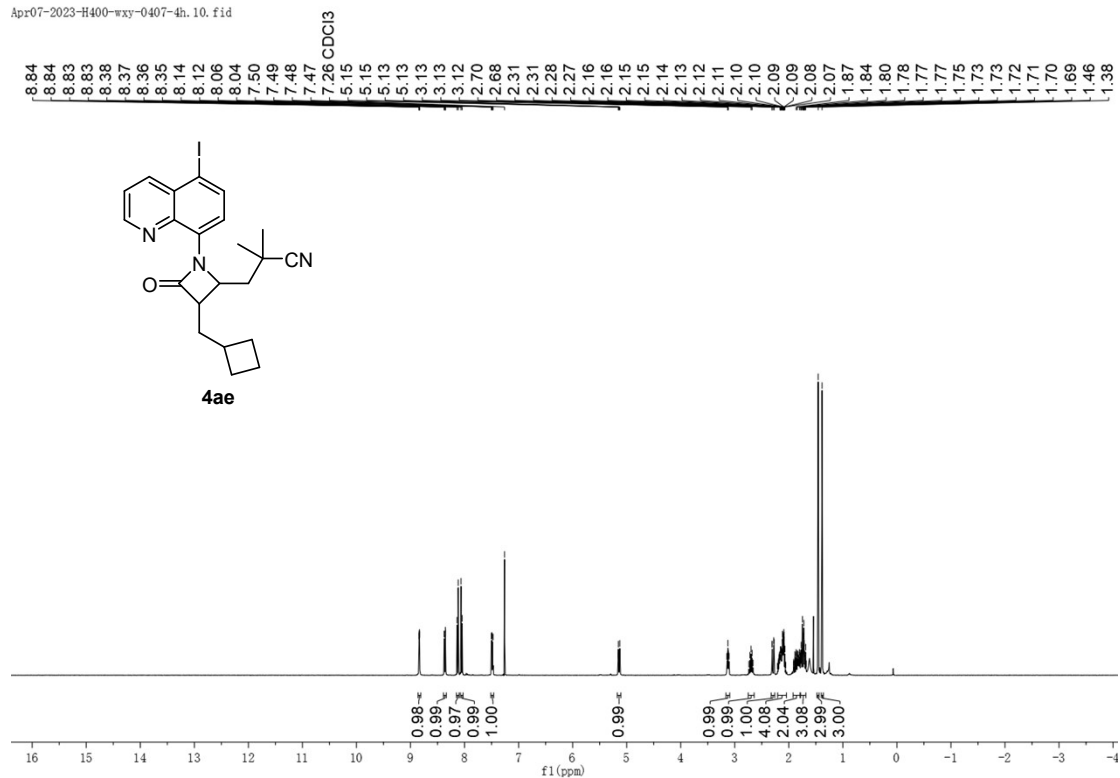

# <sup>13</sup>C NMR of 4ae (CDCl<sub>3</sub>, 101 MHz)

Apr21-2023-c400-wxy-0407-4h. 10. fid

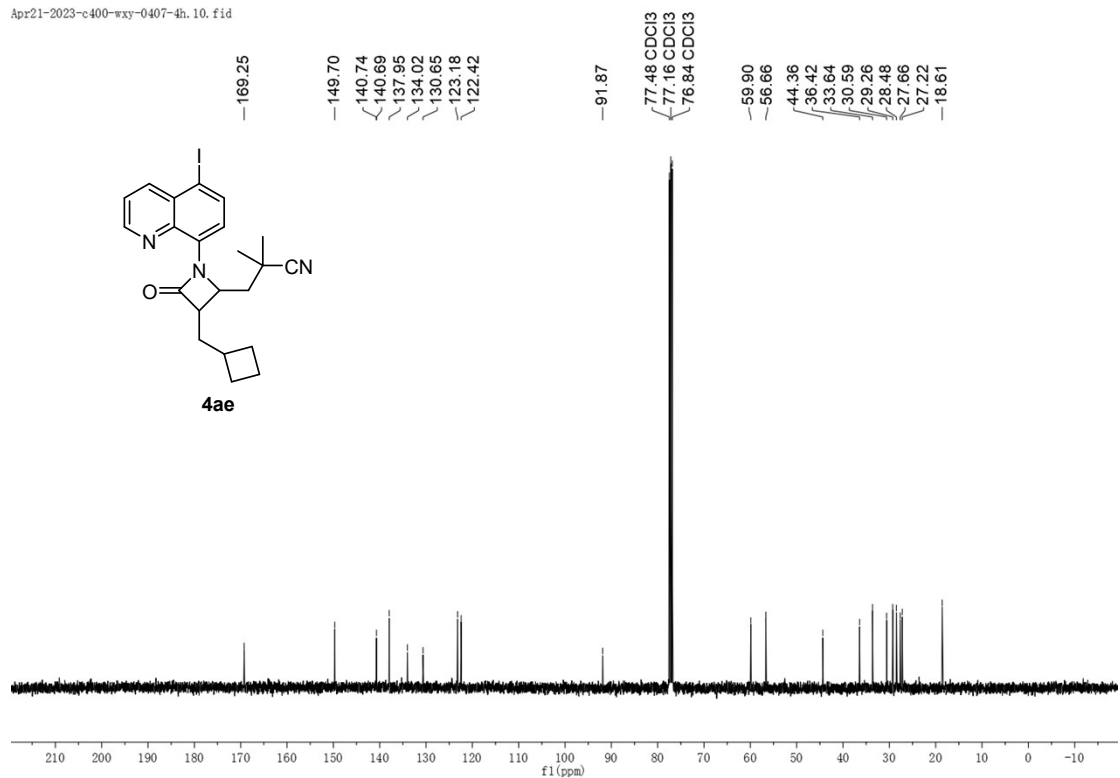

# <sup>1</sup>H NMR of 4af (CDCl<sub>3</sub>, 400 MHz)

Nov17-2023-h400-c-j-1117-5.10.fid

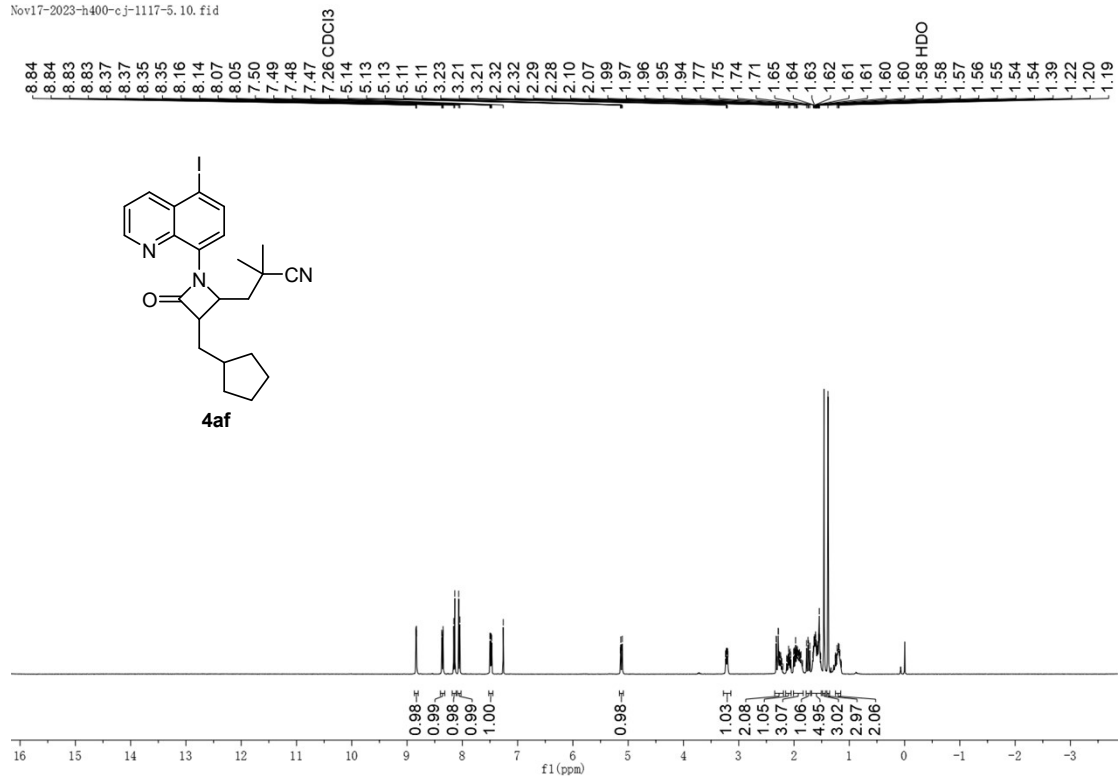

# <sup>13</sup>C NMR of 4af (CDCl<sub>3</sub>, 101 MHz)

Nov21-2023-c400-c-j-1117-5.10.fid

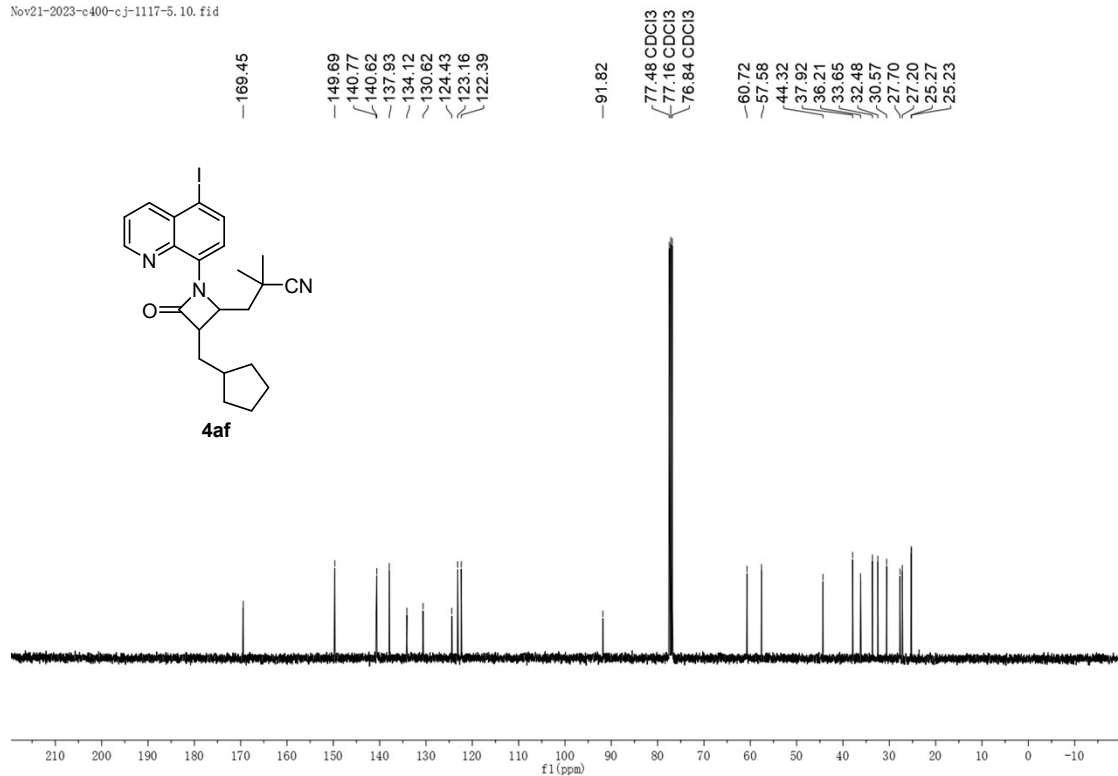

# $^1\text{H}$ NMR of 4ag ( $\text{CDCl}_3$ , 400 MHz)

Mar13-2023-h400-wxy-0310-y. 10. fid

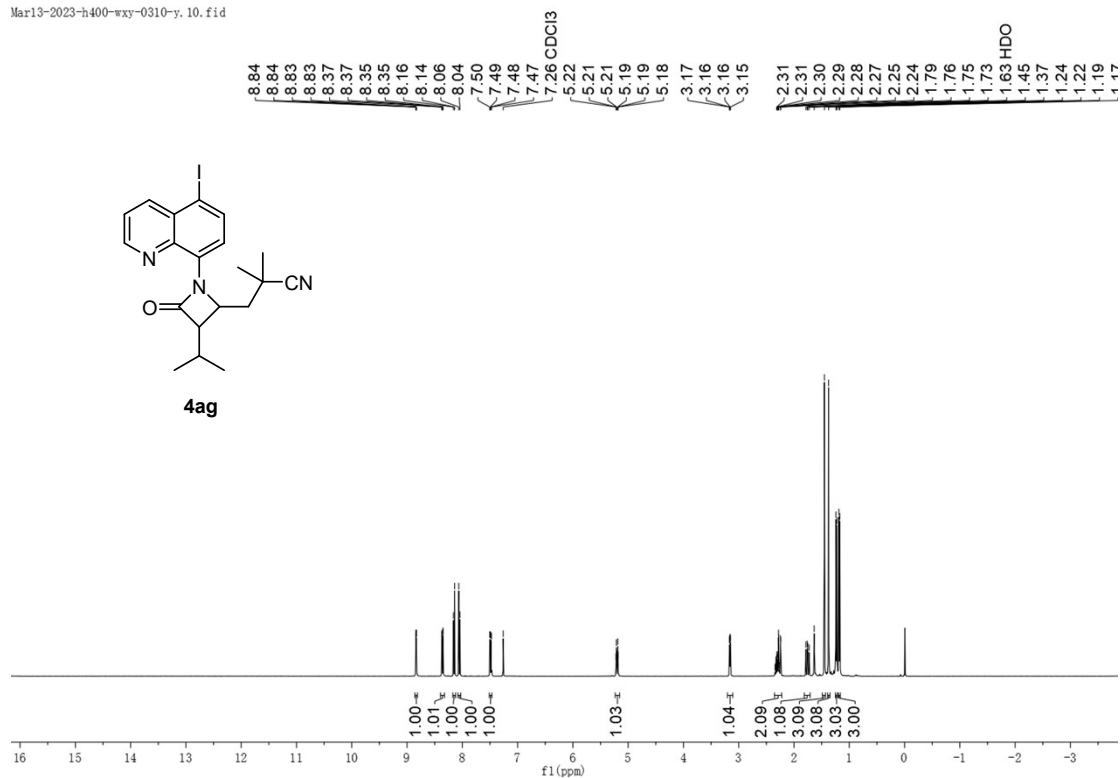

# $^{13}\text{C}$ NMR of 4ag ( $\text{CDCl}_3$ , 101 MHz)

Mar14-2023-c400-wxy-0314-y. 10. fid

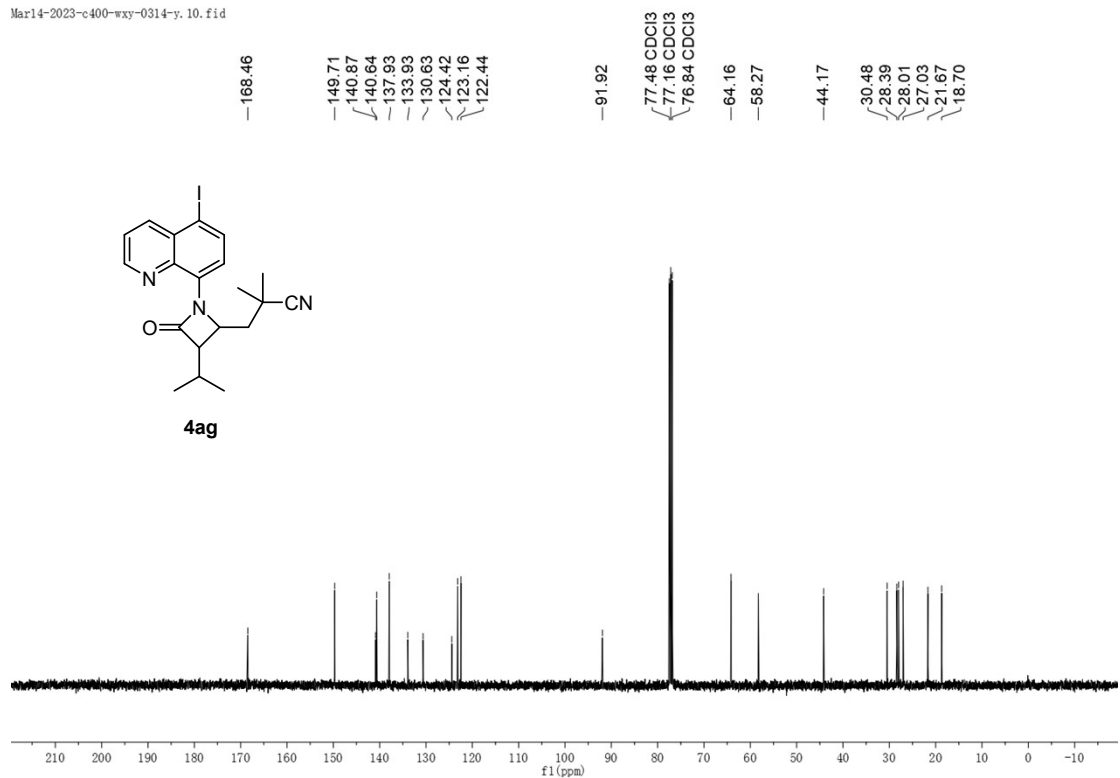

# <sup>1</sup>H NMR of 4ah (CDCl<sub>3</sub>, 400 MHz)

Mar07-2023-h400-wxy-0307-bn.10.fid

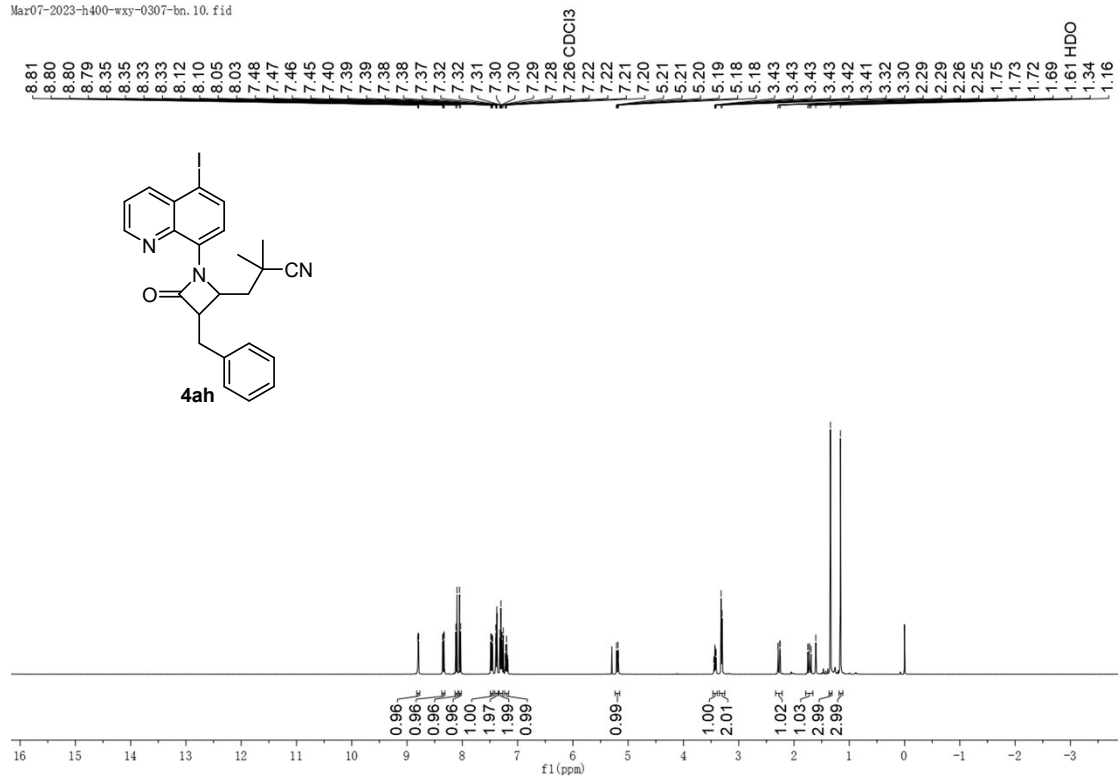

# <sup>13</sup>C NMR of 4ah (CDCl<sub>3</sub>, 101 MHz)

Mar07-2023-c400-wxy-0307-bn.10.fid

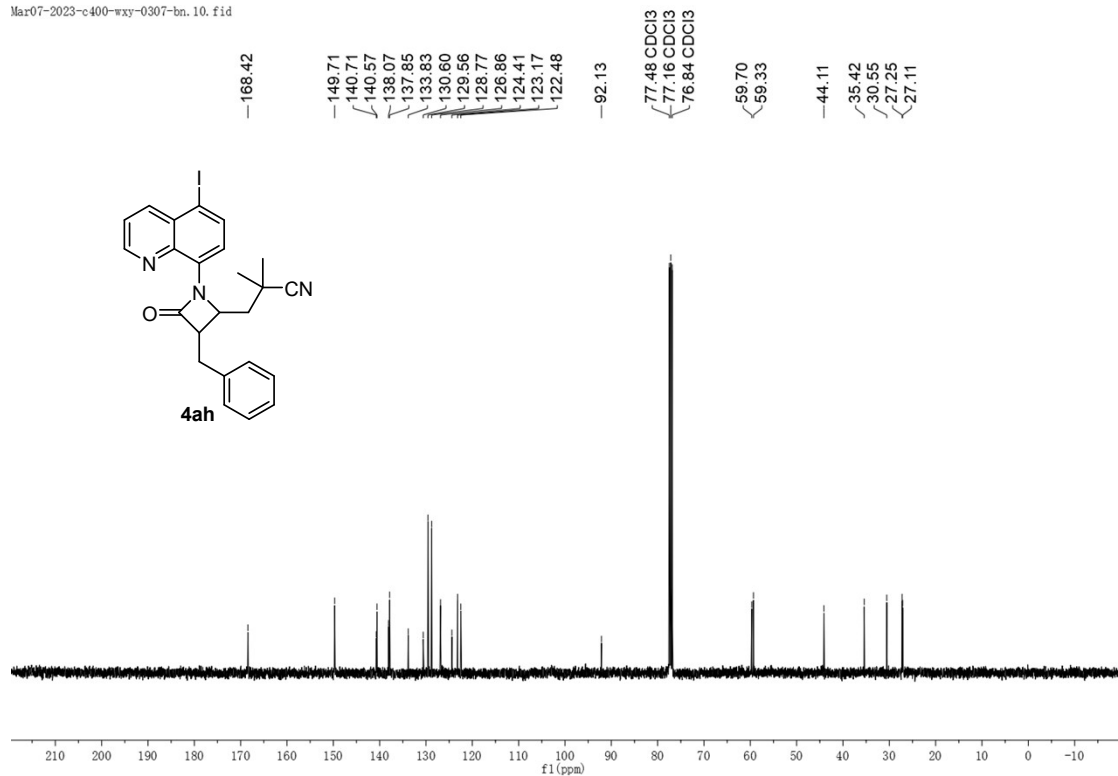

# <sup>1</sup>H NMR of 4ai (CDCl<sub>3</sub>, 400 MHz)

Mar20-2023-h400-wxy-0317-1-bn. 10. fid

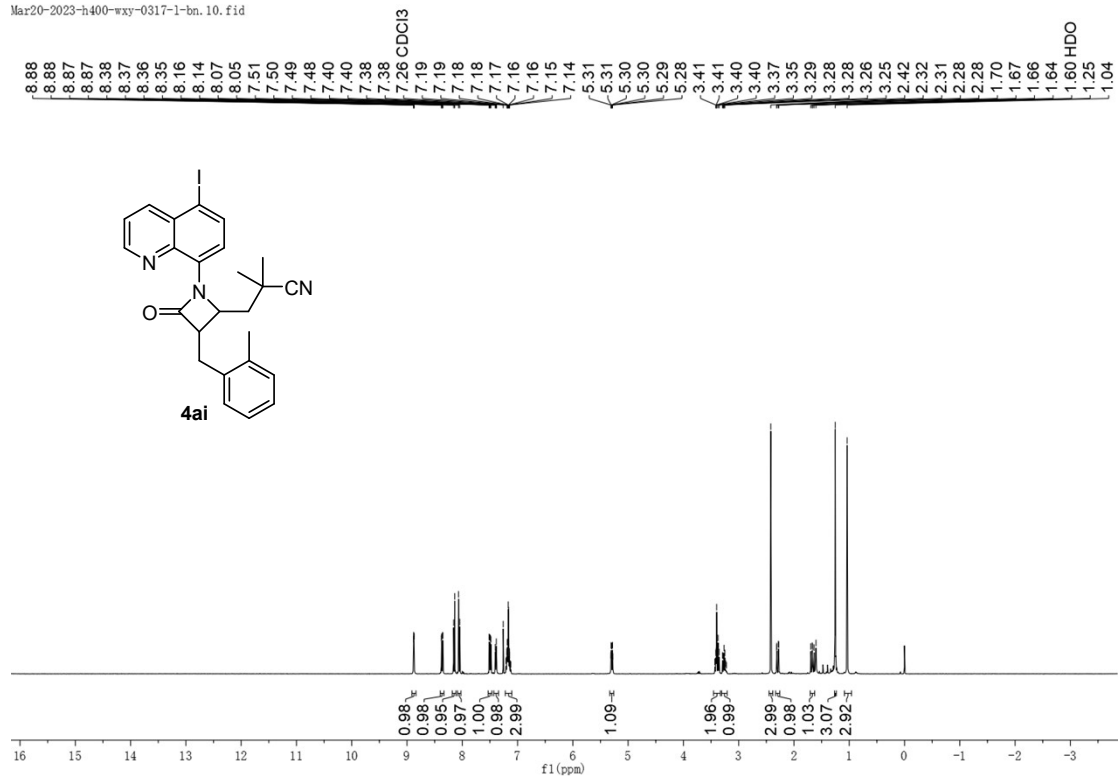

# <sup>13</sup>C NMR of 4ai (CDCl<sub>3</sub>, 101 MHz)

Mar23-2023-c400-wxy-0317-L-Bn. 10. fid

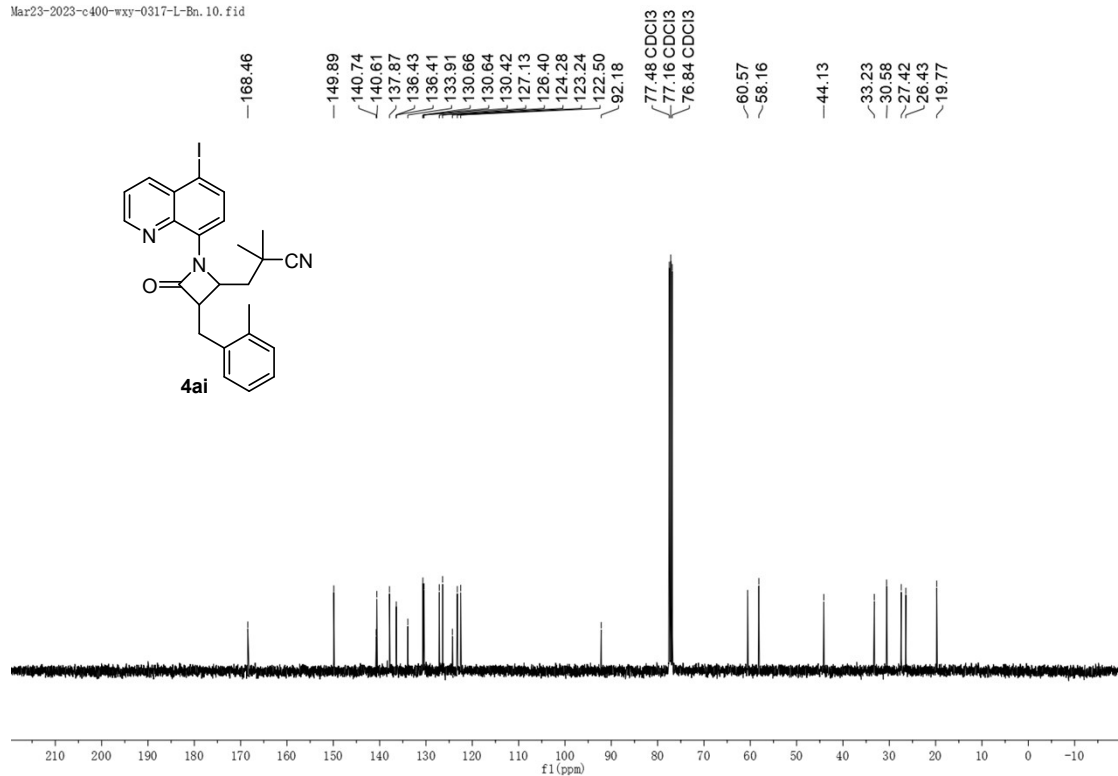



# <sup>1</sup>H NMR of 4aj (CDCl<sub>3</sub>, 400 MHz)

Apr12-2023-h400-wxy-0407-jBn. 10. fid

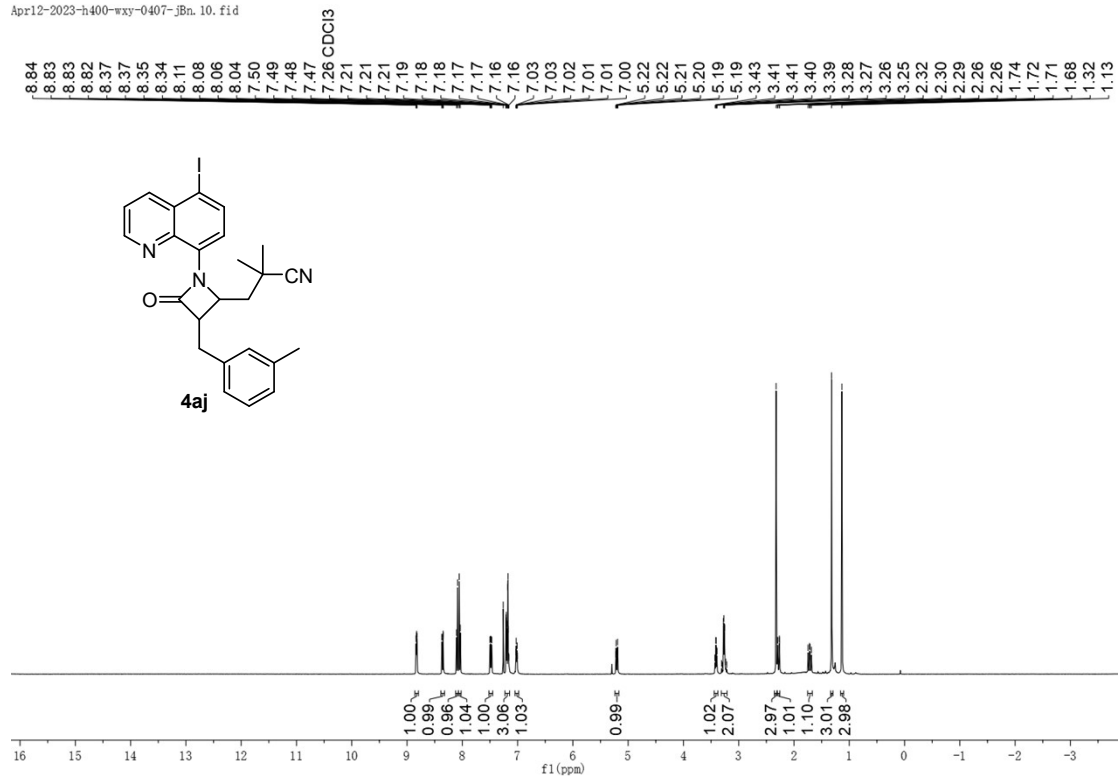

# <sup>13</sup>C NMR of 4aj (CDCl<sub>3</sub>, 101 MHz)

Apr17-2023-c400-wxy-0407-jBn. 10. fid

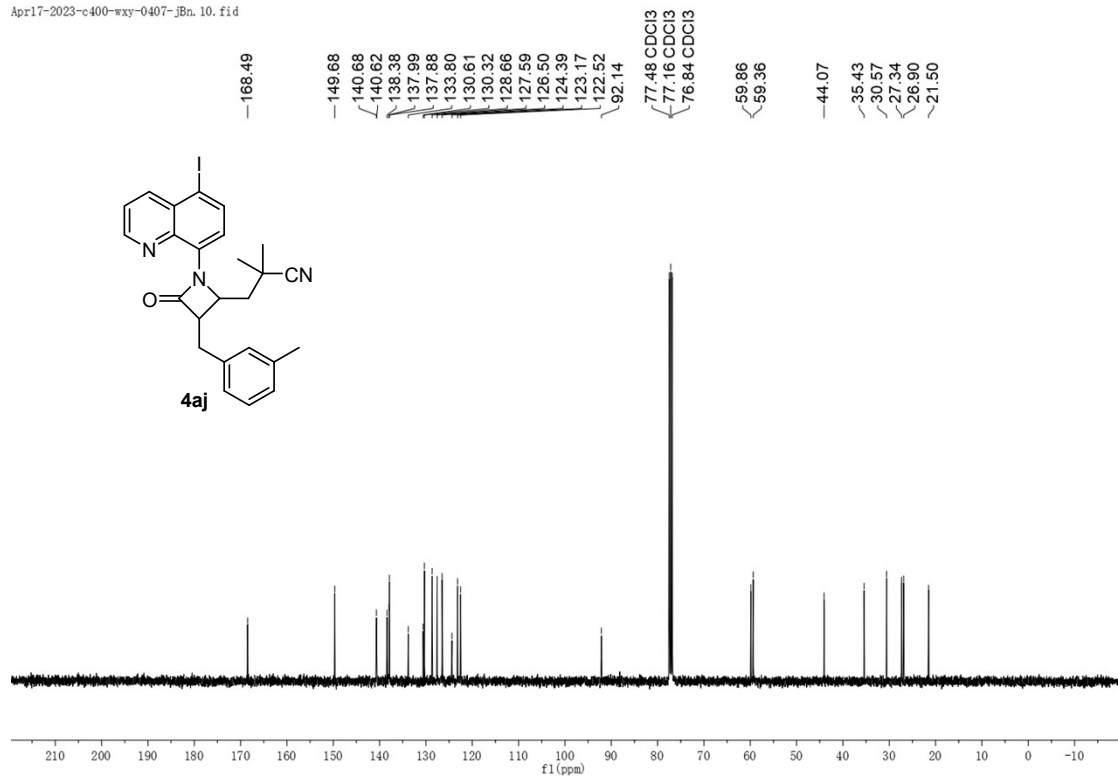

# <sup>1</sup>H NMR of 4ak (CDCl<sub>3</sub>, 400 MHz)

Mar14-2023-h400-wxy-0314-1-bn.10.fid

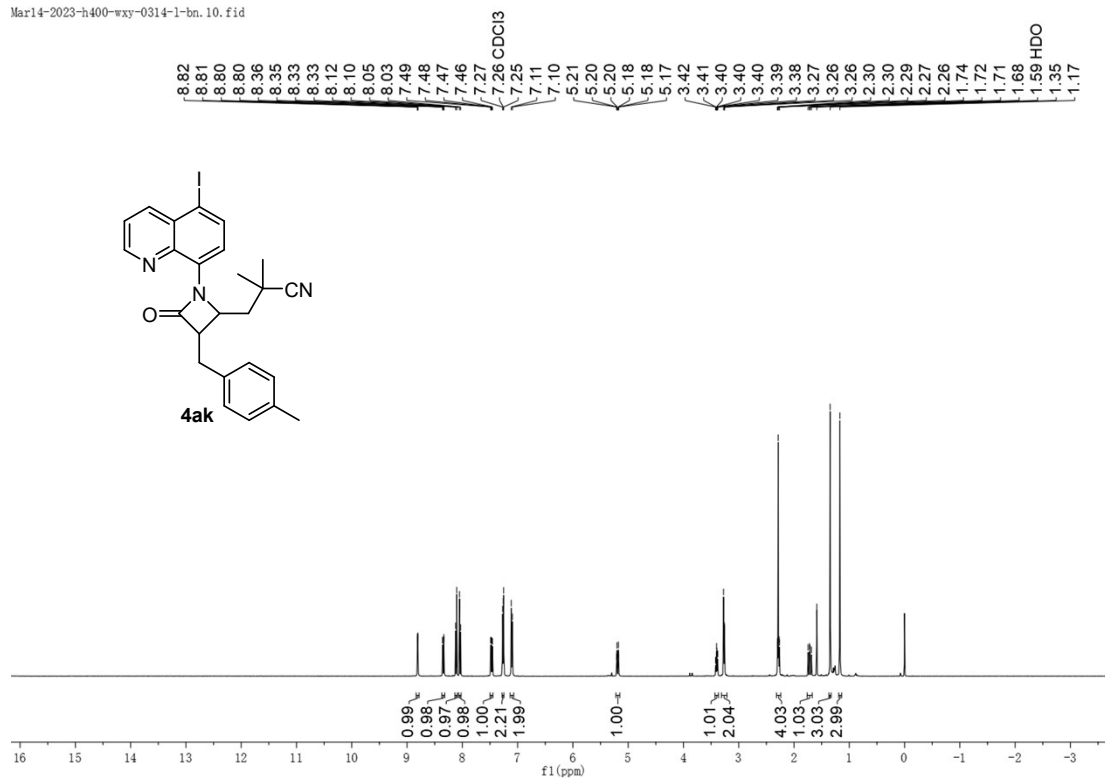

# <sup>13</sup>C NMR of 4ak (CDCl<sub>3</sub>, 101 MHz)

Mar14-2023-c400-wxy-0314-1-bn.10.fid

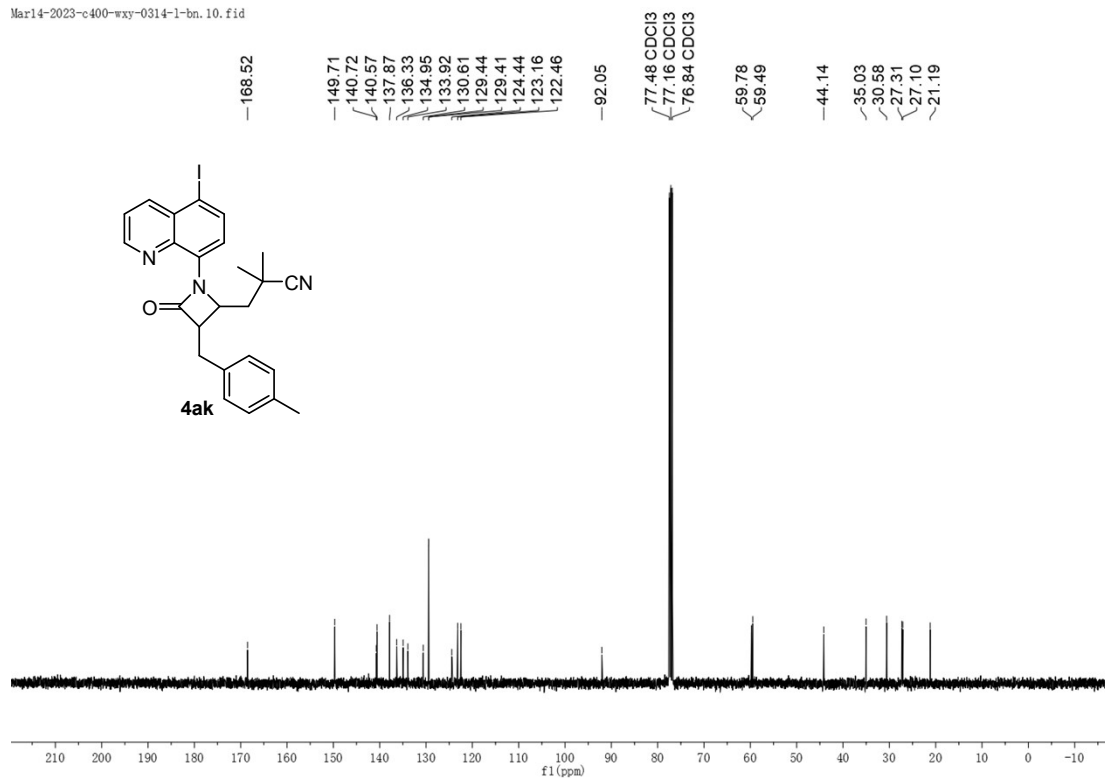

# <sup>1</sup>H NMR of 4al (CDCl<sub>3</sub>, 400 MHz)

Apr12-2023-h400-wxy-0412-F.10.fid

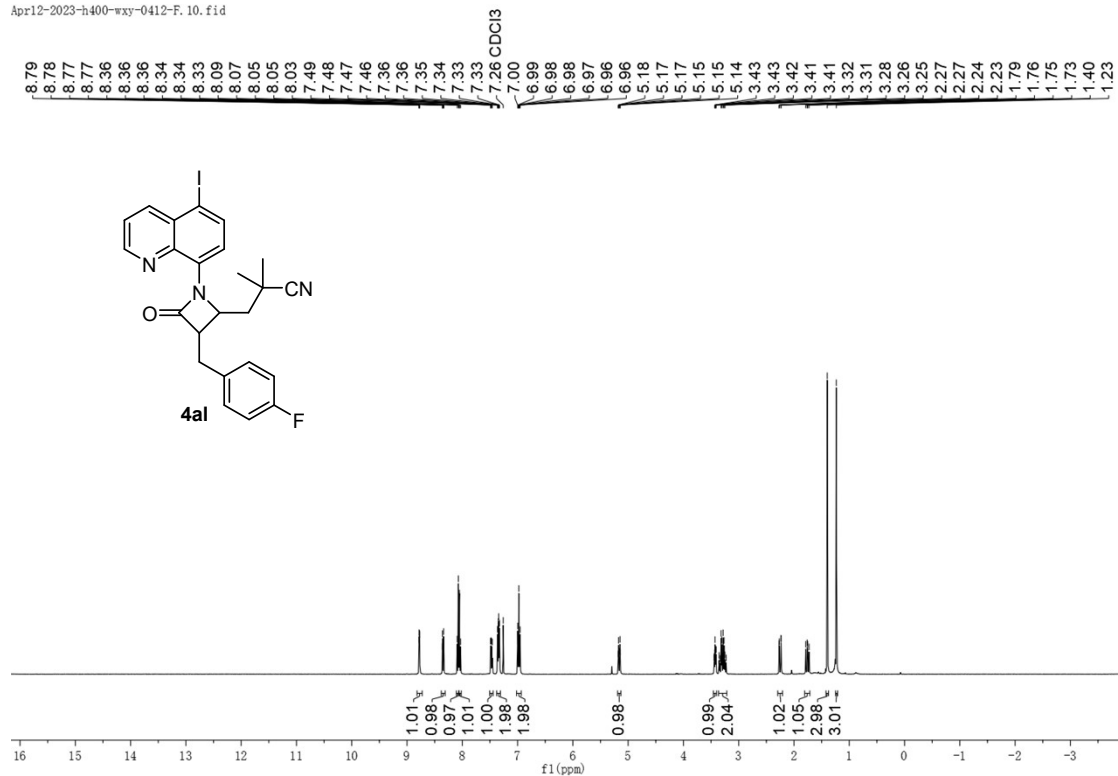

# <sup>13</sup>C NMR of 4al (CDCl<sub>3</sub>, 101 MHz)

Apr17-2023-c400-wxy-0407-4F.10.fid

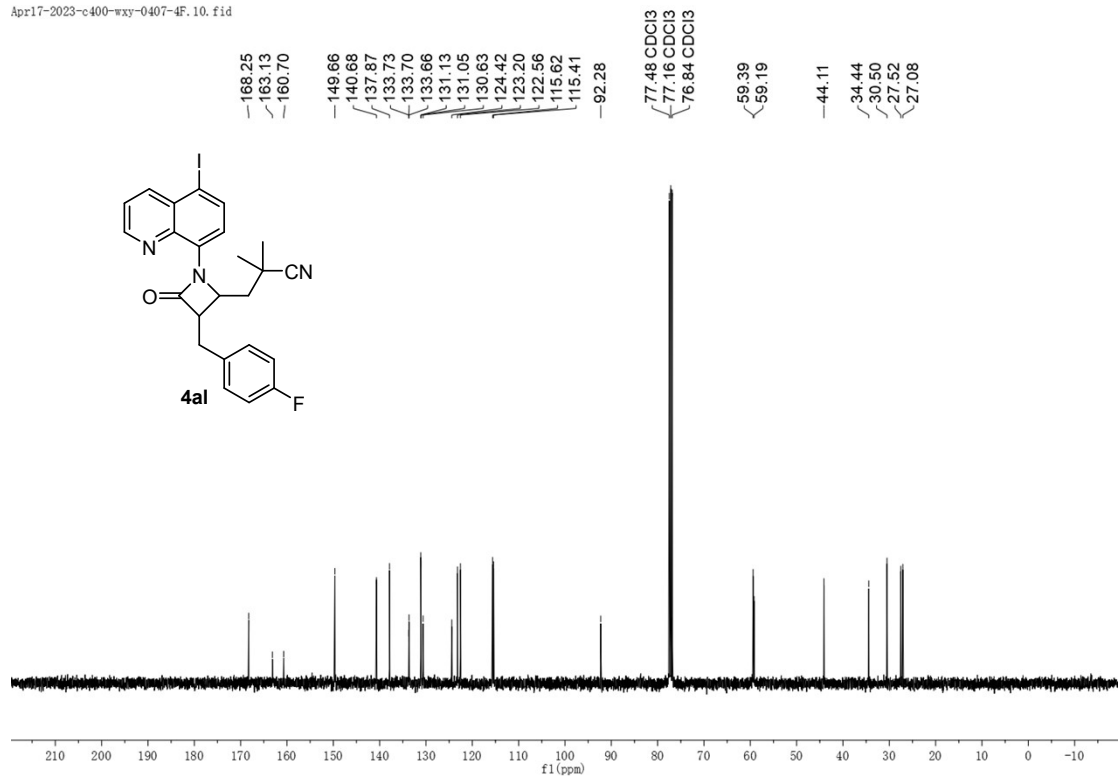

# <sup>19</sup>F NMR of 4al (CDCl<sub>3</sub>, 376 MHz)

Desktop. 10. fid

-116.38

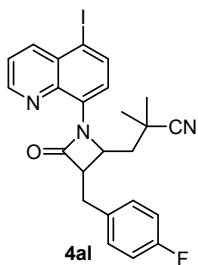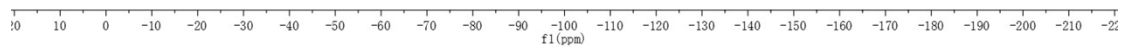

# <sup>1</sup>H NMR of 4am (CDCl<sub>3</sub>, 400 MHz)

Mar14-2023-h400-wxy-0314-xbj.10.fid

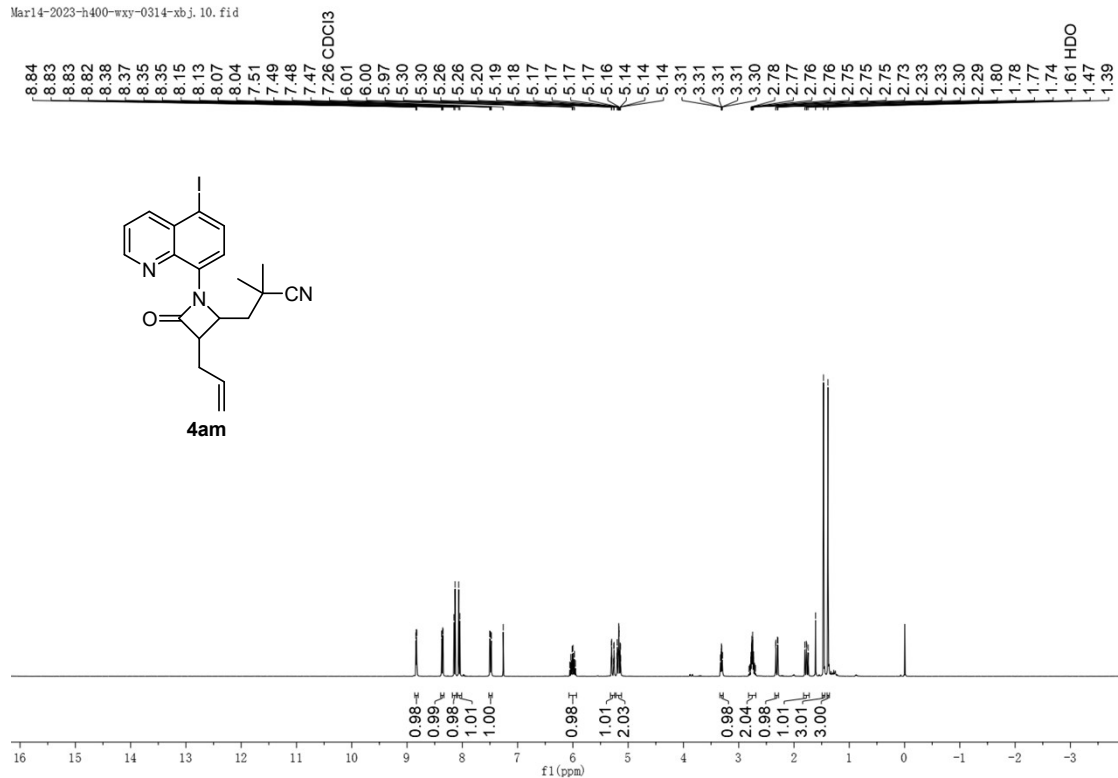

# <sup>13</sup>C NMR of 4am (CDCl<sub>3</sub>, 101 MHz)

Mar14-2023-c400-wxy-0314-xbj.10.fid

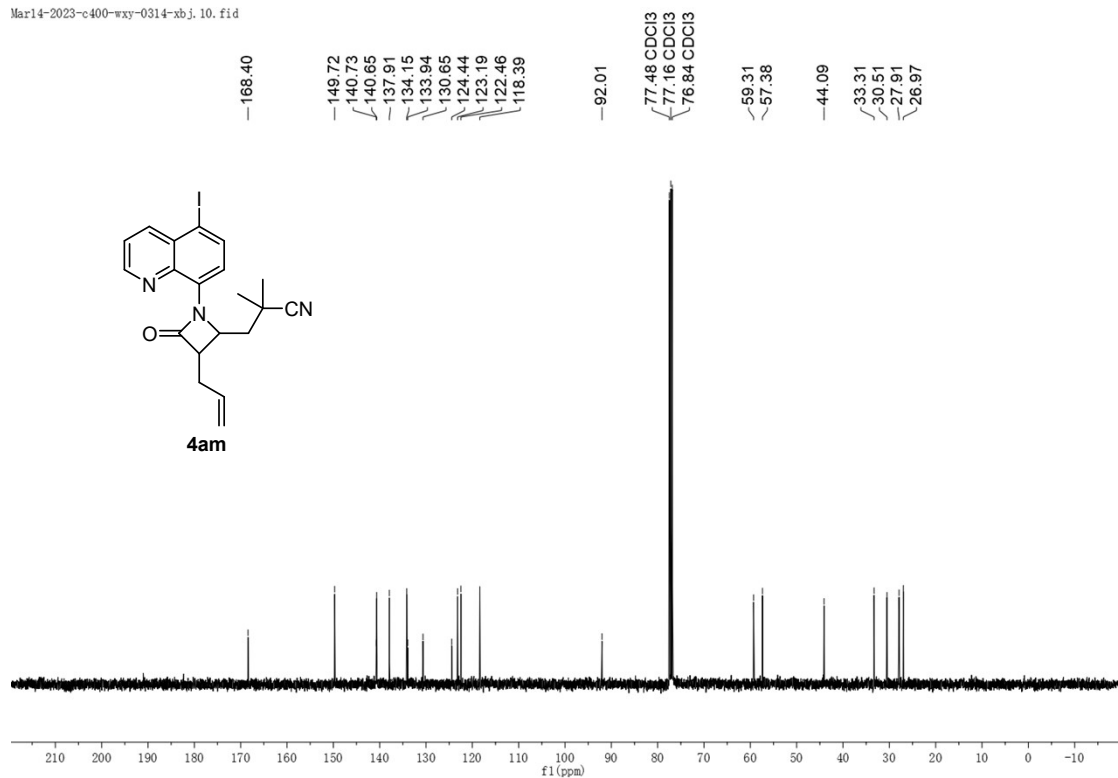

# <sup>1</sup>H NMR of 4an (CDCl<sub>3</sub>, 400 MHz)

Jun09-2023-h400-wxy-0609-Cl.10.fid

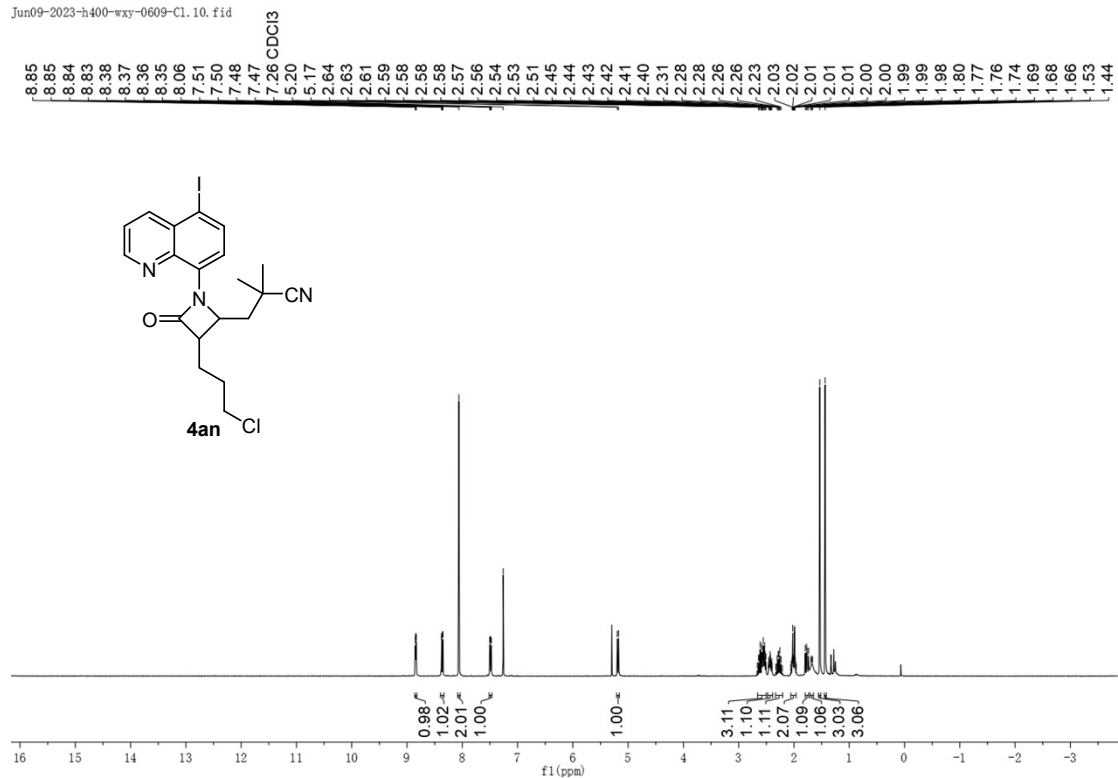

# <sup>13</sup>C NMR of 4an (CDCl<sub>3</sub>, 101 MHz)

Jul28-2023-c400-wxy-0728-Cl.10.fid

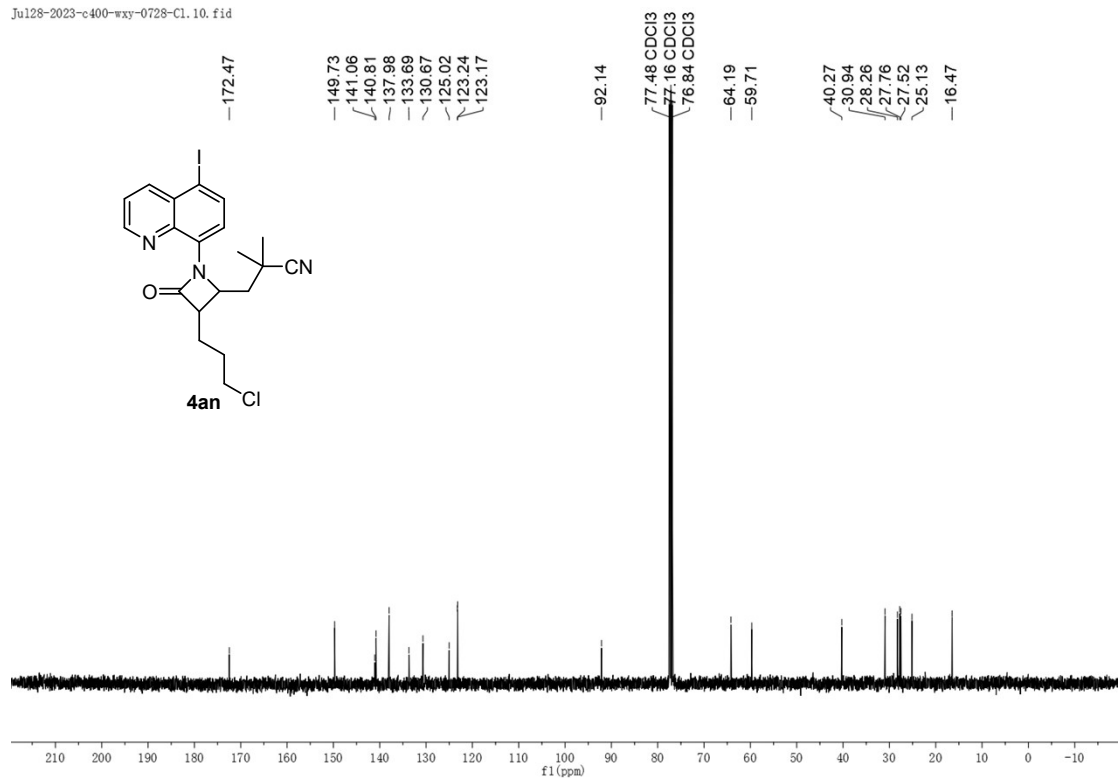

### <sup>1</sup>H NMR of 4ao (CDCl<sub>3</sub>, 400 MHz)

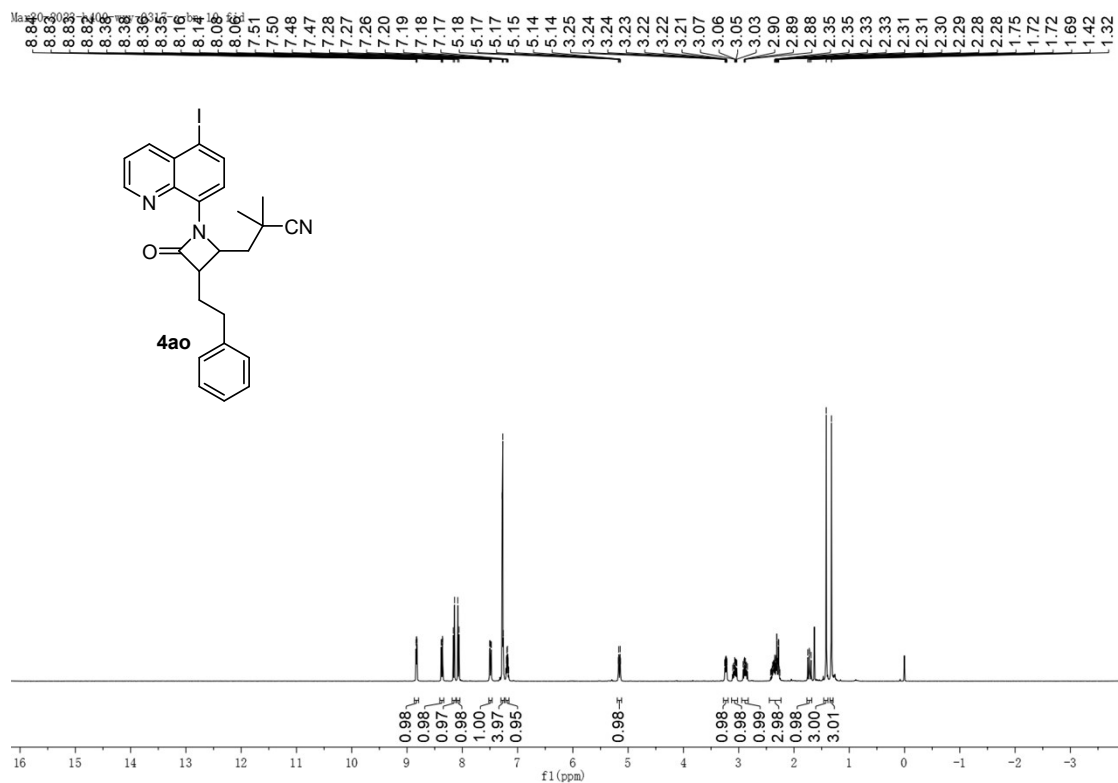

### <sup>13</sup>C NMR of 4ao (CDCl<sub>3</sub>, 101 MHz)

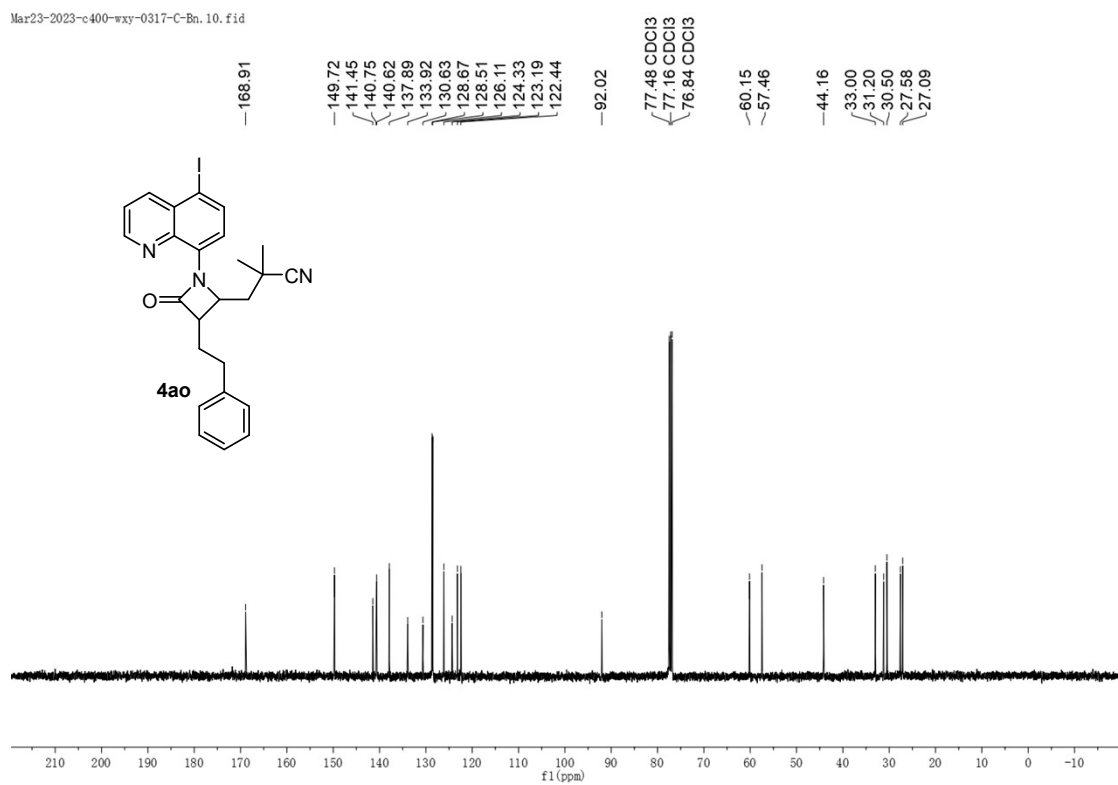

# <sup>1</sup>H NMR of 4ap (CDCl<sub>3</sub>, 400 MHz)

Mar14-2023-h400-wxy-0314-2me. 10. fid

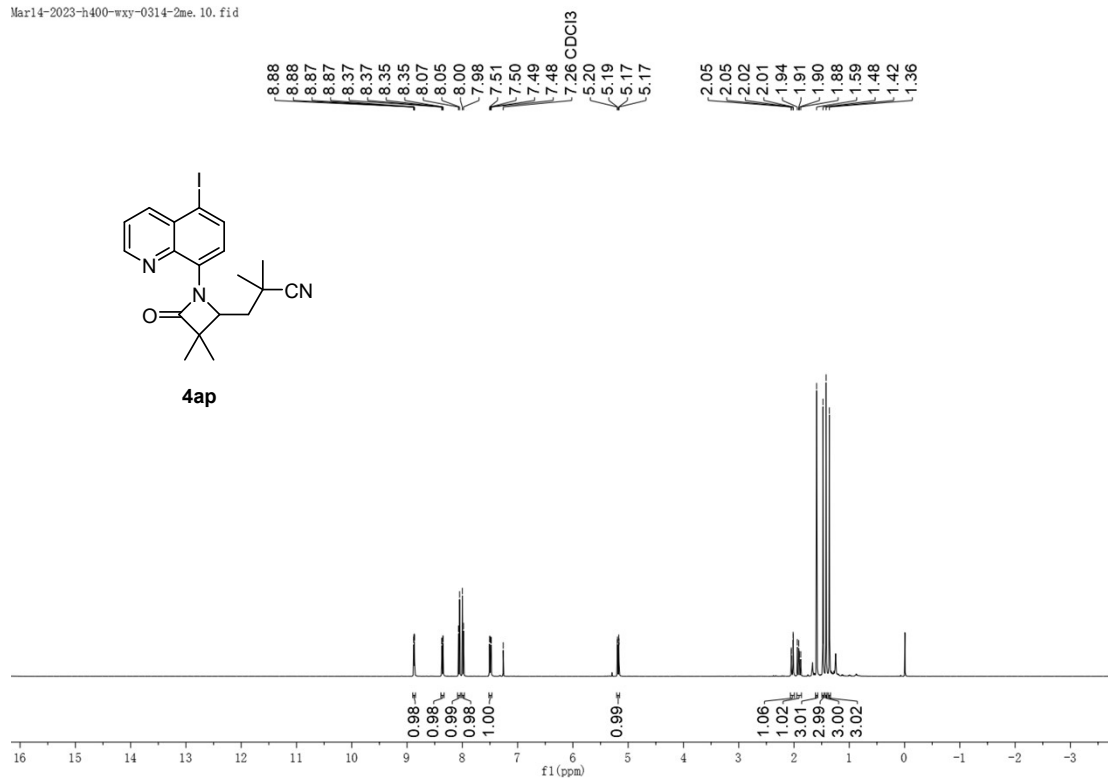

# <sup>13</sup>C NMR of 4ap (CDCl<sub>3</sub>, 101 MHz)

Mar14-2023-c400-wxy-0314-2me. 10. fid

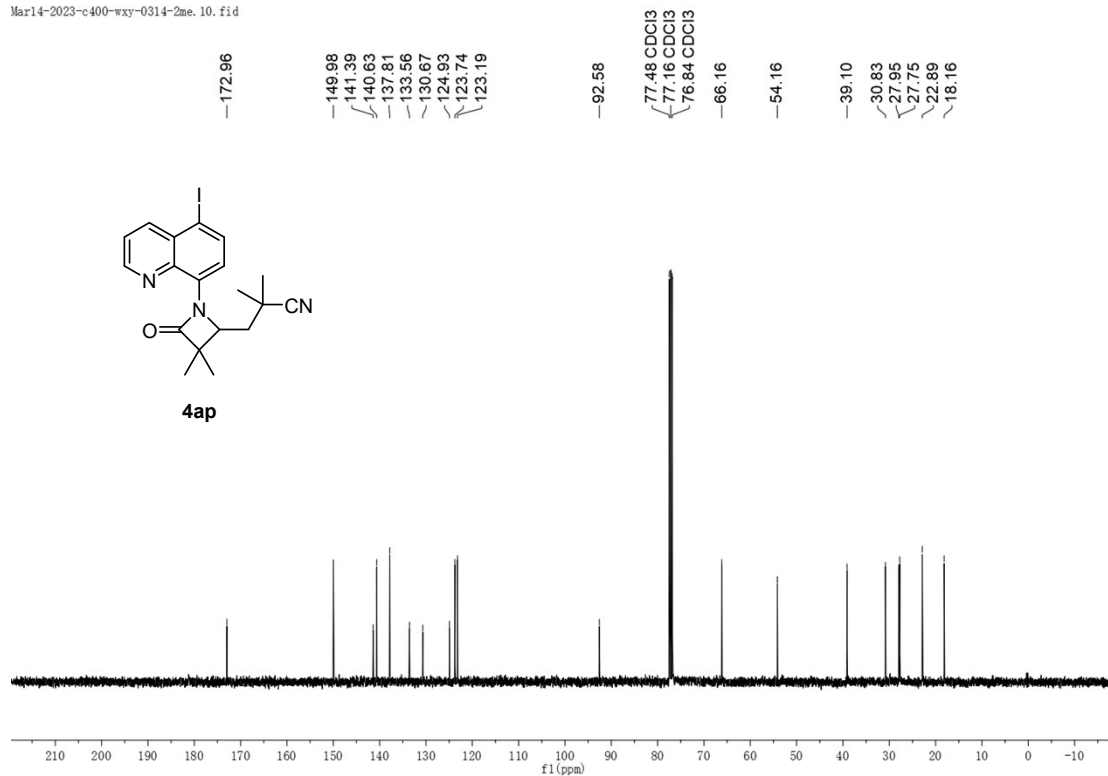



# <sup>1</sup>H NMR of 4as (CDCl<sub>3</sub>, 400 MHz)

Jul27-2023-H400-wxy-0727-01.10.fid

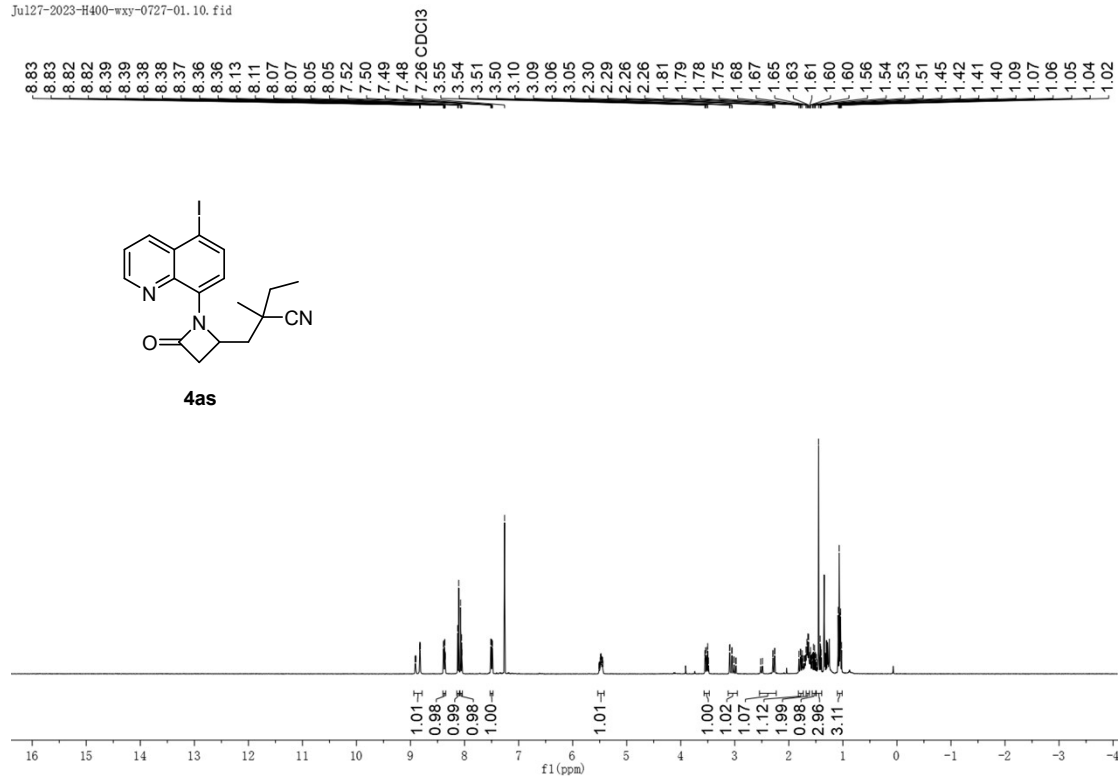

# <sup>13</sup>C NMR of 4as (CDCl<sub>3</sub>, 101 MHz)

Jul28-2023-c400-wxy-0727-01.10.fid

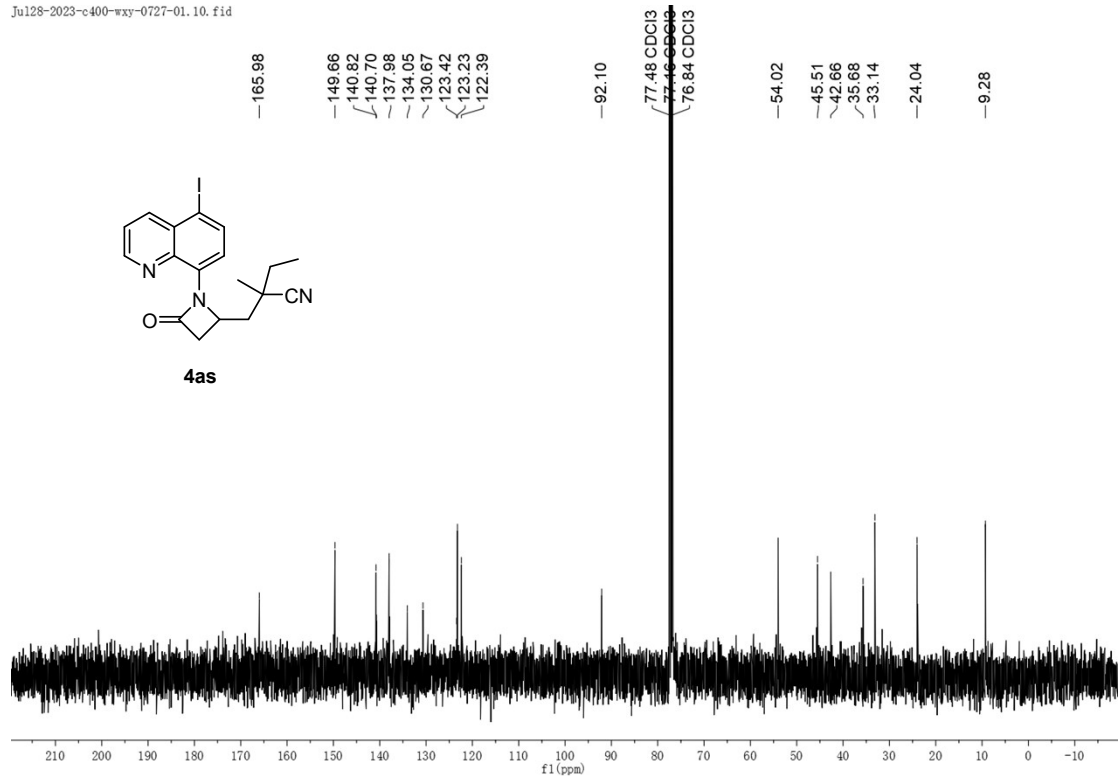



# $^1\text{H}$ NMR of **5** ( $\text{CDCl}_3$ , 400 MHz)

Nov24-2023-h400-cj-1124-BHT. 10. fid

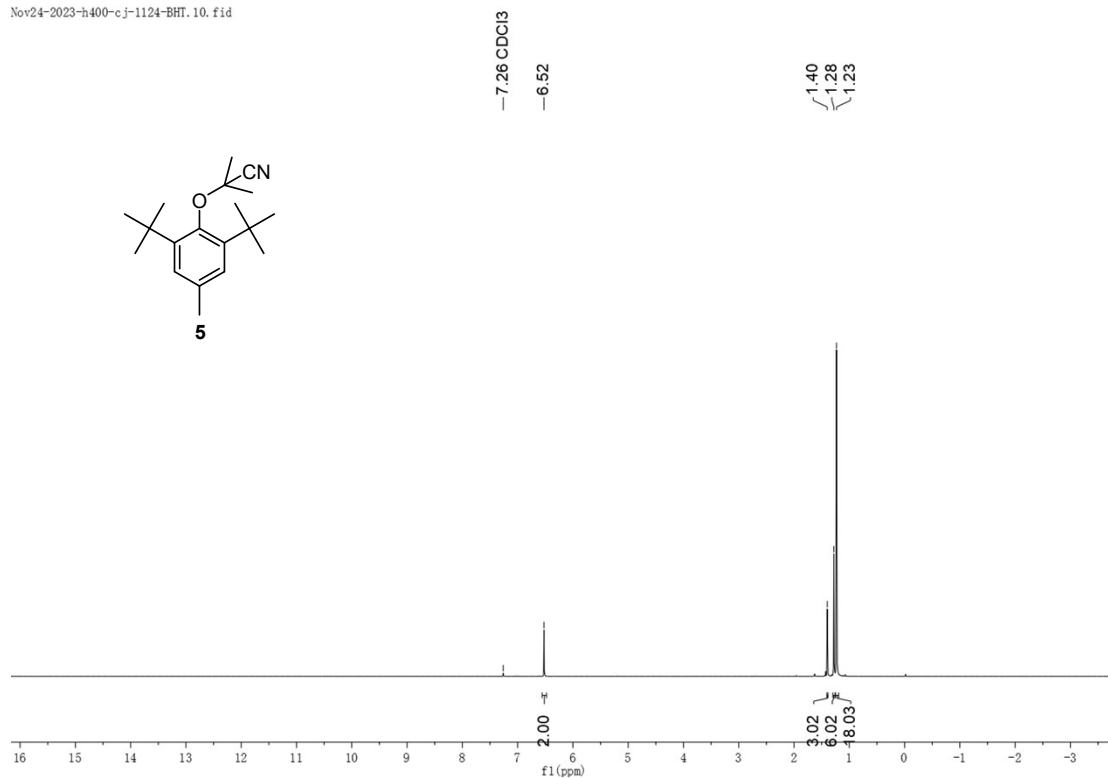

# $^{13}\text{C}$ NMR of **4at** ( $\text{CDCl}_3$ , 101 MHz)

Nov24-2023-c400-cj-1124-BHT. 11. fid

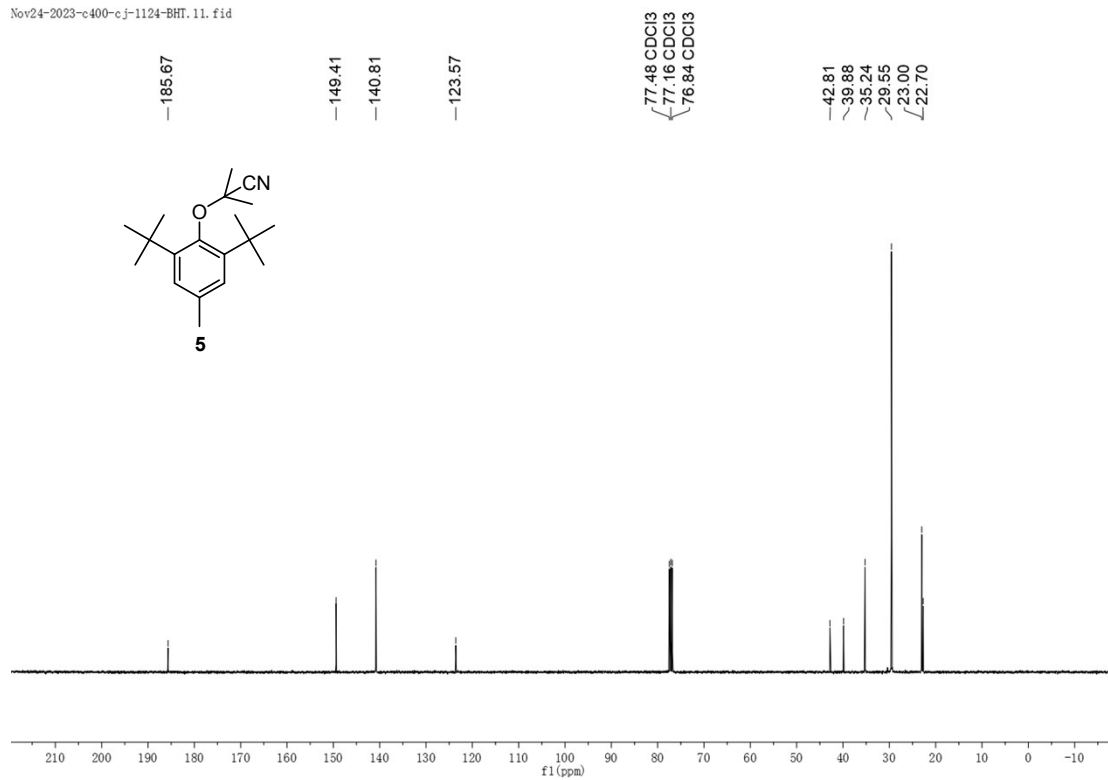

Supplement: d4ra04113e1.pdf [file d4ra04113e1.pdf]
